# Supplementary material for: Merging metabolomics and genomics provides a catalog of genetic factors that influence molecular phenotypes in pigs linking relevant metabolic pathways
Source: Genet Sel Evol. 2025 Mar 6;57:11. doi: 10.1186/s12711-025-00960-8 (PMC11887101; doi:10.1186/s12711-025-00960-8)
Supplement: Supplementary file 1 — Additional file 1: Table S1. Metabolites included in the study. Summary statistics of metabolite levels for the Large White and Duroc pig populations are provided. Table S2. List of the components of the basic diet for the piglets involved in the nutrigenetic longitudinal study. Table S3. Analyzed composition of the basic diet for the piglets involved in the nutrigenetic longitudinal study. Table S8. Narrow sense heritability (h2P) and genomic heritability (h2SNP) of the metabolite level. Description: Estimates are provided for the Large White and Duroc pig populations. Negative estimates are not reported. Table S9. All genetic association signals obtained in the Large White and Duroc pig populations. Description: Results include the study of both single metabolites and metabolite ratios. Table S10. All genetic association signals obtained in the meta-analyses. Description: Results include the study of both single metabolites and metabolite ratios. Table S11. Complete list of mQTL identified in pigs and comparative analysis of mQTL between pigs and humans. Table S12. Extended information obtained from GWAS Catalog of mQTL identified in humans. Table S14. Genetic variants identified from whole-genome resequencing of Large White, Duroc and Landrace pigs. Description: Only missense variants, frameshift variants, in-frame deletions and insertions, stop gained and start lost variants are reported. For each pig breed (Large White, Duroc and Landrace), the number of animals carrying the three genotypes and allele frequencies are provided. Table S18. All significant Gaussian Graphical Model (GGM) edge weights (i.e. Partial Correlation Coefficients, PCC > 0.3) obtained from the metabolomic profiles of the investigated Large White and Duroc pigs. Description: Comparative information reported in previous studies in humans, the linked mQTL and the proposed metabolic pathway explanations are provided. [file 12711_2025_960_MOESM1_ESM.xlsx]

## Sheet: Legend
Additional file 1
Merging metabolomics and genomics provides a catalog of genetic factors that influence molecular phenotypes in pigs linking relevant metabolic pathways
Samuele Bovo1*, Anisa Ribani1, Flaminia Fanelli2,3, Giuliano Galimberti4, Pier Luigi Martelli5, Paolo Trevisi6, Francesca Bertolini1, Matteo Bolner1, Rita Casadio5, Stefania Dall’Olio1, Maurizio Gallo7, Diana Luise6, Gianluca Mazzoni1, Giuseppina Schiavo1, Valeria Taurisano1, Paolo Zambonelli1, Paolo Bosi6, Uberto Pagotto2,3, Luca Fontanesi1*
1Animal and Food Genomics Group, Division of Animal Sciences, Department of Agricultural and Food Sciences, University of Bologna, Bologna, Italy
2Endocrinology Research Group, Center for Applied Biomedical Research, Department of Medical and Surgical Sciences, University of Bologna, Bologna, Italy
3Division of Endocrinology and Prevention and Care of Diabetes, IRCCS Azienda Ospedaliero-Universitaria di Bologna, Policlinico di Sant’Orsola, Bologna, Italy
4Department of Statistical Sciences “Paolo Fortunati”, University of Bologna, Bologna, Italy
5Biocomputing Group, Department of Pharmacology and Biotechnology, University of Bologna, Bologna, Italy
6Laboratory on Animal Nutrition and Feeding for Livestock Sustainability and Resilience, Division of Animal Sciences, Department of Agricultural and Food Sciences, University of Bologna, Bologna, Italy
7Associazione Nazionale Allevatori Suini, Roma, Italy
*Corresponding authors: Luca Fontanesi, luca.fontanesi@unibo.it; Samuele Bovo, samuele.bovo@unibo.it
Legends for the Supplementary Tables
Table S1. Metabolites included in the study. Summary statistics of metabolite levels for the Large White and Duroc pig populations are provided.
Table S8. Narrow sense heritability (h2P) and genomic heritability (h2SNP) of the metabolite level. Estimates are provided for the Large White and Duroc pig populations. Negative estimates are not reported.
Table S9. All genetic association signals obtained in the Large White and Duroc pig populations. Results include the study of both single metabolites and metabolite ratios.
Table S10. All genetic association signals obtained in the meta-analyses. Results include the study of both the single metabolite and metabolite ratios.
Table S11. Complete list of mQTL identified in pigs and comparative analysis of mQTL between pigs and humans.
Table S12. Extended information obtained from GWAS Catalog of mQTL identified in humans.
Table S14. Genetic variants identified from whole-genome resequencing of Large White, Duroc and Landrace pigs. Only missense, frameshift, in-frame deletions and insertion, stop gained and start lost variants are reported. For each pig breed (Large White, Duroc and Landrace), the number of animals carrying the three genotypes and allele frequencies are provided.
Table S18. All significant Gaussian Graphical Model (GGM) edge weights (i.e. Partial Correlation Coefficients, PCC>0.3) obtained from the metabolomic profiles of the investigated Large White and Duroc pigs. Comparative information reported in previous studies in humans, the linked mQTL and the proposed metabolic pathway explanations are provided.

## Sheet: Table_S1
Table S1. Metabolites included in the study. Summary statistics of metabolite levels for the Large White and Duroc pig populations are provided.
						Large White			Duroc
Metabolite number	Class	Metabolite	Biochemical name	Coefficient of variation in Large White	Coefficient of variation in Duroc	Mean	S.D.	Median	Mean	S.D.	Median
1	Acylcarnitine	C0	Carnitine	CV<30	CV<30	6.44724	1.61795	6.23	6.899	1.163	6.825
2	Acylcarnitine	C10	Decanoylcarnitine	CV<30	CV<30	0.0894079	0.0326604	0.082	0.145	0.07	0.112
3	Acylcarnitine	C10:1	Decenoylcarnitine	CV<30	CV<30	0.0434307	0.0148443	0.04	0.067	0.015	0.065
4	Acylcarnitine	C10:2	Decadienylcarnitine	CV<30	CV<30	0.0231703	0.00809483	0.021	0.034	0.01	0.032
5	Acylcarnitine	C12	Dodecanoylcarnitine	CV<30	CV<30	0.0755667	0.136137	0.045	0.052	0.016	0.049
6	Acylcarnitine	C12:1	Dodecenoylcarnitine	CV<30	CV<30	0.0467255	0.0214486	0.04	0.056	0.012	0.055
7	Acylcarnitine	C12-DC	Dodecanedioylcarnitine	CV<30	CV<30	0.167501	0.0417385	0.162	0.233	0.023	0.232
8	Acylcarnitine	C14	Tetradecanoylcarnitine	CV<30	CV<30	0.0145934	0.00411615	0.014	0.022	0.007	0.019
9	Acylcarnitine	C14:1	Tetradecenoylcarnitine	CV<30	CV<30	0.023338	0.0072524	0.022	0.03	0.006	0.03
10	Acylcarnitine	C14:1-OH	Hydroxytetradecenoylcarnitine	CV<30	CV<30	0.00687802	0.00243604	0.006	0.014	0.006	0.011
11	Acylcarnitine	C14:2	Tetradecadienylcarnitine	CV<30	CV<30	0.00577382	0.00284003	0.005	0.01	0.005	0.008
12	Acylcarnitine	C14:2-OH	Hydroxytetradecadienylcarnitine	CV<30	CV<30	0.00689327	0.00201299	0.007	0.012	0.004	0.011
13	Acylcarnitine	C16	Hexadecanoylcarnitine	CV<30	CV<30	0.0229187	0.00916535	0.021	0.027	0.009	0.025
14	Acylcarnitine	C16:1	Hexadecenoylcarnitine	CV<30	CV<30	0.00744091	0.00222096	0.007	0.012	0.004	0.011
15	Acylcarnitine	C16:1-OH	Hydroxyhexadecenoylcarnitine	CV<30	CV<30	0.00583355	0.00383676	0.006	0.008	0.003	0.007
16	Acylcarnitine	C16:2	Hexadecadienylcarnitine	CV<30	CV<30	0.0270623	0.00845708	0.025	0.057	0.005	0.057
17	Acylcarnitine	C16:2-OH	Hydroxyhexadecadienylcarnitine	CV<30	CV<30	0.00660356	0.00207799	0.007	0.013	0.005	0.012
18	Acylcarnitine	C16-OH	Hydroxyhexadecanoylcarnitine	CV<30	CV<30	0.00395172	0.00156282	0.004	0.007	0.003	0.006
19	Acylcarnitine	C18	Octadecanoylcarnitine	CV<30	CV<30	0.0182033	0.00742497	0.017	0.021	0.007	0.019
20	Acylcarnitine	C18:1	Octadecenoylcarnitine	CV<30	CV<30	0.0261753	0.0122659	0.023	0.03	0.01	0.029
21	Acylcarnitine	C18:1-OH	Hydroxyoctadecenoylcarnitine	CV<30	CV<30	0.0106989	0.00352728	0.01	0.014	0.002	0.014
22	Acylcarnitine	C18:2	Octadecadienylcarnitine	CV<30	CV<30	0.0101741	0.00380249	0.01	0.015	0.005	0.015
23	Acylcarnitine	C2	Acetylcarnitine	CV<30	CV<30	1.65214	1.74948	1.33	1.2	0.317	1.153
24	Acylcarnitine	C3	Propionylcarnitine	CV<30	CV<30	0.0940661	0.0462127	0.084	0.119	0.034	0.112
25	Acylcarnitine	C3:1	Propenonylcarnitine	CV<30	CV<30	0.0129301	0.00732415	0.011	0.031	0.011	0.028
26	Acylcarnitine	C3-DC (C4-OH)	Hydroxybutyrylcarnitine	CV<30	CV<30	0.0480775	0.0324936	0.042	0.065	0.017	0.06
27	Acylcarnitine	C3-OH	Hydroxypropionylcarnitine	CV<30	CV<30	0.0783926	0.0346439	0.076	0.151	0.065	0.134
28	Acylcarnitine	C4	Butyrylcarnitine	CV<30	CV<30	0.0465832	0.0203451	0.041	0.072	0.023	0.065
29	Acylcarnitine	C4:1	Butenylcarnitine	CV<30	CV<30	0.0307764	0.0109464	0.028	0.049	0.012	0.046
30	Acylcarnitine	C5	Valerylcarnitine	CV<30	CV<30	0.0311423	0.0140594	0.028	0.056	0.025	0.046
31	Acylcarnitine	C5:1	Tiglylcarnitine	CV<30	CV<30	0.025892	0.00888296	0.025	0.046	0.013	0.044
32	Acylcarnitine	C5:1-DC	Glutaconylcarnitine	CV<30	CV>30	0.0107166	0.00658227	0.009	-	-	-
33	Acylcarnitine	C5-DC (C6-OH)	Glutarylcarnitine	CV<30	CV<30	0.0139949	0.00550453	0.013	0.031	0.015	0.026
34	Acylcarnitine	C5-M-DC	Methylglutarylcarnitine	CV<30	CV<30	0.0387535	0.0142576	0.034	0.062	0.034	0.048
35	Acylcarnitine	C5-OH (C3-DC-M)	Hydroxyvalerylcarnitine (Methylmalonylcarnitine)	CV<30	CV>30	0.0818526	0.0619347	0.063	-	-	-
36	Acylcarnitine	C6 (C4:1-DC)	Hexanoylcarnitine	CV<30	CV<30	0.0396264	0.0124319	0.04	0.064	0.025	0.052
37	Acylcarnitine	C6:1	Hexenoylcarnitine	CV<30	CV<30	0.0226455	0.00830839	0.022	0.036	0.012	0.031
38	Acylcarnitine	C7-DC	Pimelylcarnitine	CV<30	CV>30	0.0134168	0.00529334	0.012	-	-	-
39	Acylcarnitine	C8	Octanoylcarnitine	CV<30	CV<30	0.0833837	0.0332534	0.075	0.137	0.049	0.113
40	Acylcarnitine	C9	Nonaylcarnitine	CV<30	CV>30	0.0332109	0.0157782	0.03	-	-	-
41	Amino acid	Ala	Alanine	CV<30	CV<30	464.895	119.757	456	394.503	91.534	384.5
42	Amino acid	Arg	Arginine	CV<30	CV<30	120.152	27.7075	117	105.801	21.962	104
43	Amino acid	Asn	Asparagine	CV<30	CV<30	51.1197	13.3147	49.7	32.568	8.935	31.2
44	Amino acid	Asp	Aspartate	CV>30	CV>30	-	-	-	-	-	-
45	Amino acid	Cit	Citrulline	CV<30	CV<30	79.6493	22.5404	77.1	63.78	17.391	61.75
46	Amino acid	Gln	Glutamine	CV<30	CV<30	458.56	99.3176	444	346.874	64.322	343
47	Amino acid	Glu	Glutamate	CV<30	CV<30	199.439	75.2885	189	201.035	58.022	192.5
48	Amino acid	Gly	Glycine	CV<30	CV<30	710.376	175.449	696	575.804	85.391	575.5
49	Amino acid	His	Histidine	CV<30	CV<30	89.8531	17.4731	88.1	76.699	13.452	75.9
50	Amino acid	Ile	Isoleucine	CV<30	CV<30	105.13	21.8828	103	104.374	19.505	104
51	Amino acid	Leu	Leucine	CV<30	CV<30	196.552	41.0684	191	187.121	33.269	185
52	Amino acid	Lys	Lysine	CV<30	CV<30	225.268	58.0365	219	160.336	27.043	160
53	Amino acid	Met	Methionine	CV<30	CV<30	33.7939	7.95259	32.8	32.329	6.529	31.95
54	Amino acid	Orn	Ornithine	CV<30	CV<30	75.0437	22.3371	71.6	58.518	11.528	58
55	Amino acid	Phe	Phenylalanine	CV<30	CV<30	80.7766	14.6284	79	79.038	12.202	78.7
56	Amino acid	Pro	Proline	CV<30	CV<30	179.828	37.5021	175	182.262	29.87	180
57	Amino acid	Ser	Serine	CV<30	CV<30	105.697	24.1552	102	92.987	18.174	92.75
58	Amino acid	Thr	Threonine	CV<30	CV<30	146.099	34.4729	142	119.377	24.319	117
59	Amino acid	Trp	Tryptophan	CV<30	CV<30	48.7767	9.55669	48.1	54.997	9.514	54.75
60	Amino acid	Tyr	Tyrosine	CV<30	CV<30	78.372	17.0585	76.6	73.581	14.406	72.3
61	Amino acid	Val	Valine	CV<30	CV<30	223.215	43.6658	221	206.399	29.152	206
62	Biogenic amine	Ac-Orn	Acetylornithine	CV<30	CV<30	10.065	5.1363	9.17	5.083	2.923	4.515
63	Biogenic amine	ADMA	Asymmetric dimethylarginine	CV<30	CV<30	1.2474	0.333684	1.19	1.065	0.269	1.04
64	Biogenic amine	alpha-AAA	alpha-Aminoadipic acid	CV<30	CV<30	23.8725	12.1898	21.9	34.548	17.515	31.4
65	Biogenic amine	Carnosine	Carnosine	CV>30	CV<30	-	-	-	32.267	11.346	30.5
66	Biogenic amine	Creatinine	Creatinine	CV<30	CV<30	199.051	41.4701	194	148.47	27.645	144
67	Biogenic amine	Histamine	Histamine	CV>30	CV<30	-	-	-	1.193	0.859	1.035
68	Biogenic amine	Kynurenine	Kynurenine	CV<30	CV<30	1.19306	0.49671	1.14	0.313	0.277	0.241
69	Biogenic amine	Met-SO	Methioninesulfoxide	CV<30	CV<30	0.958025	0.35537	0.931	0.826	0.252	0.835
70	Biogenic amine	Nitro-Tyr	3-nitrotyrosine	CV>30	CV>30	-	-	-	-	-	-
71	Biogenic amine	OH-Pro	Hydroxyproline	CV>30	CV>30	-	-	-	-	-	-
72	Biogenic amine	PEA	Phenylethylamine	CV>30	CV>30	-	-	-	-	-	-
73	Biogenic amine	Putrescine	Putrescine	CV<30	CV<30	0.725338	0.244529	0.675	0.609	0.154	0.594
74	Biogenic amine	Sarcosine	Sarcosine	CV<30	CV>30	8.95931	2.79959	8.47	-	-	-
75	Biogenic amine	SDMA	Symmetric Dimethylarginine	CV>30	CV>30	-	-	-	-	-	-
76	Biogenic amine	Serotonin	Serotonin	CV<30	CV<30	0.897532	0.850155	0.683	1.181	0.815	1.03
77	Biogenic amine	Spermidine	Spermidine	CV<30	CV<30	0.972916	0.426318	0.915	0.657	0.228	0.621
78	Biogenic amine	Spermine	Spermine	CV<30	CV<30	0.539386	0.24858	0.485	0.277	0.084	0.268
79	Biogenic amine	t4-OH-Pro	trans-4-Hydroxyproline	NA	CV<30	NA	NA	NA	55.178	13.528	53.75
80	Biogenic amine	c4-OH-Pro	cis-4-Hydroxyproline	NA	CV>30	NA	NA	NA	-	-	-
81	Biogenic amine	Taurine	Taurine	CV<30	CV<30	151.509	35.8392	150	149.777	38.714	149.5
82	Biogenic amine	total DMA	Sum of ADMA and SDMA	CV<30	CV<30	1.28819	0.371088	1.23	1.154	0.359	1.17
83	Glycerophospholipid	lysoPC a C14:0	lysoPhosphatidylcholine acyl C14:0	CV<30	CV<30	2.01562	0.356457	2.05	2.4	0.152	2.393
84	Glycerophospholipid	lysoPC a C16:0	lysoPhosphatidylcholine acyl C16:0	CV<30	CV<30	49.7146	10.5278	49.3	42.982	8.343	42.665
85	Glycerophospholipid	lysoPC a C16:1	lysoPhosphatidylcholine acyl C16:1	CV<30	CV<30	1.33787	0.254348	1.33	1.112	0.21	1.091
86	Glycerophospholipid	lysoPC a C17:0	lysoPhosphatidylcholine acyl C17:0	CV<30	CV<30	1.12096	0.305059	1.1	1.091	0.27	1.083
87	Glycerophospholipid	lysoPC a C18:0	lysoPhosphatidylcholine acyl C18:0	CV<30	CV<30	31.6829	6.49093	31.5	26.635	5.436	26.46
88	Glycerophospholipid	lysoPC a C18:1	lysoPhosphatidylcholine acyl C18:1	CV<30	CV<30	16.3781	3.62684	16.3	13.937	3.174	13.422
89	Glycerophospholipid	lysoPC a C18:2	lysoPhosphatidylcholine acyl C18:2	CV<30	CV<30	19.6358	5.68901	18.8	19.1	5.114	17.949
90	Glycerophospholipid	lysoPC a C20:3	lysoPhosphatidylcholine acyl C20:3	CV<30	CV<30	1.16551	0.410775	1.09	1.23	0.388	1.167
91	Glycerophospholipid	lysoPC a C20:4	lysoPhosphatidylcholine acyl C20:4	CV<30	CV<30	9.79695	2.78837	9.42	9.119	2.748	8.554
92	Glycerophospholipid	lysoPC a C24:0	lysoPhosphatidylcholine acyl C24:0	CV<30	CV>30	0.302028	0.25688	0.196	-	-	-
93	Glycerophospholipid	lysoPC a C26:0	lysoPhosphatidylcholine acyl C26:0	CV>30	CV>30	-	-	-	-	-	-
94	Glycerophospholipid	lysoPC a C26:1	lysoPhosphatidylcholine acyl C26:1	CV>30	CV>30	-	-	-	-	-	-
95	Glycerophospholipid	lysoPC a C28:0	lysoPhosphatidylcholine acyl C28:0	CV>30	CV>30	-	-	-	-	-	-
96	Glycerophospholipid	lysoPC a C28:1	lysoPhosphatidylcholine acyl C28:1	CV>30	CV>30	-	-	-	-	-	-
97	Glycerophospholipid	PC aa C24:0	Phosphatidylcholine diacyl C24:0	CV>30	CV>30	-	-	-	-	-	-
98	Glycerophospholipid	PC aa C26:0	Phosphatidylcholine diacyl C26:0	CV<30	CV>30	1.12147	0.913635	0.746	-	-	-
99	Glycerophospholipid	PC aa C28:1	Phosphatidylcholine diacyl C28:1	CV<30	CV<30	0.529719	0.186082	0.498	0.803	0.197	0.774
100	Glycerophospholipid	PC aa C30:0	Phosphatidylcholine diacyl C30:0	CV<30	CV<30	1.06707	0.197217	1.05	1.544	0.27	1.539
101	Glycerophospholipid	PC aa C30:2	Phosphatidylcholine diacyl C30:2	CV<30	CV<30	0.215052	0.14874	0.162	1.372	0.296	1.363
102	Glycerophospholipid	PC aa C32:0	Phosphatidylcholine diacyl C32:0	CV<30	CV<30	4.32294	1.03716	4.19	5.187	1.09	5.08
103	Glycerophospholipid	PC aa C32:1	Phosphatidylcholine diacyl C32:1	CV<30	CV<30	2.02641	0.584999	1.98	1.763	0.453	1.693
104	Glycerophospholipid	PC aa C32:2	Phosphatidylcholine diacyl C32:2	CV<30	CV<30	0.61485	0.157715	0.596	0.89	0.162	0.878
105	Glycerophospholipid	PC aa C32:3	Phosphatidylcholine diacyl C32:3	CV<30	CV<30	0.103408	0.0359702	0.094	0.219	0.052	0.211
106	Glycerophospholipid	PC aa C34:1	Phosphatidylcholine diacyl C34:1	CV<30	CV<30	78.2724	19.5026	76.4	75.155	16.604	74.121
107	Glycerophospholipid	PC aa C34:2	Phosphatidylcholine diacyl C34:2	CV<30	CV<30	105.061	30.0343	101	111.93	24.64	110.762
108	Glycerophospholipid	PC aa C34:3	Phosphatidylcholine diacyl C34:3	CV<30	CV<30	3.49601	0.910875	3.42	3.554	0.778	3.472
109	Glycerophospholipid	PC aa C34:4	Phosphatidylcholine diacyl C34:4	CV<30	CV<30	0.235071	0.0566445	0.229	0.256	0.048	0.253
110	Glycerophospholipid	PC aa C36:0	Phosphatidylcholine diacyl C36:0	CV<30	CV<30	0.564443	0.250117	0.596	0.531	0.136	0.528
111	Glycerophospholipid	PC aa C36:1	Phosphatidylcholine diacyl C36:1	CV<30	CV<30	38.9349	9.58153	38.2	38.413	8.442	37.805
112	Glycerophospholipid	PC aa C36:2	Phosphatidylcholine diacyl C36:2	CV<30	CV<30	113.307	26.2063	112	123.407	23.216	121.595
113	Glycerophospholipid	PC aa C36:3	Phosphatidylcholine diacyl C36:3	CV<30	CV<30	26.6552	8.0772	25.3	27.954	6.636	27.35
114	Glycerophospholipid	PC aa C36:4	Phosphatidylcholine diacyl C36:4	CV<30	CV<30	57.8421	14.6249	57.5	57.633	11.058	57.828
115	Glycerophospholipid	PC aa C36:5	Phosphatidylcholine diacyl C36:5	CV<30	CV<30	1.9998	0.533956	1.95	1.918	0.443	1.896
116	Glycerophospholipid	PC aa C36:6	Phosphatidylcholine diacyl C36:6	CV<30	CV<30	0.0947675	0.0221049	0.093	0.121	0.026	0.118
117	Glycerophospholipid	PC aa C38:0	Phosphatidylcholine diacyl C38:0	CV<30	CV<30	0.376719	0.089012	0.368	0.46	0.108	0.445
118	Glycerophospholipid	PC aa C38:1	Phosphatidylcholine diacyl C38:1	CV<30	CV<30	0.430737	0.137256	0.426	0.492	0.13	0.477
119	Glycerophospholipid	PC aa C38:3	Phosphatidylcholine diacyl C38:3	CV<30	CV<30	22.0454	6.635	21.4	21.452	5.732	20.664
120	Glycerophospholipid	PC aa C38:4	Phosphatidylcholine diacyl C38:4	CV<30	CV<30	155.103	31.7123	154	143.661	24.209	142.349
121	Glycerophospholipid	PC aa C38:5	Phosphatidylcholine diacyl C38:5	CV<30	CV<30	30.4654	6.42533	30.4	28.889	5.39	28.907
122	Glycerophospholipid	PC aa C38:6	Phosphatidylcholine diacyl C38:6	CV<30	CV<30	9.76329	2.60181	9.46	11.002	2.64	10.668
123	Glycerophospholipid	PC aa C40:1	Phosphatidylcholine diacyl C40:1	CV<30	CV<30	0.20764	0.05504	0.197	0.277	0.05	0.27
124	Glycerophospholipid	PC aa C40:2	Phosphatidylcholine diacyl C40:2	CV<30	CV<30	0.282809	0.0754775	0.276	0.294	0.064	0.287
125	Glycerophospholipid	PC aa C40:3	Phosphatidylcholine diacyl C40:3	CV<30	CV<30	0.450183	0.121544	0.433	0.474	0.076	0.472
126	Glycerophospholipid	PC aa C40:4	Phosphatidylcholine diacyl C40:4	CV<30	CV<30	11.4162	3.529	10.8	8.636	2.444	8.609
127	Glycerophospholipid	PC aa C40:5	Phosphatidylcholine diacyl C40:5	CV<30	CV<30	22.8738	6.01372	22.1	19.365	3.942	19.07
128	Glycerophospholipid	PC aa C40:6	Phosphatidylcholine diacyl C40:6	CV<30	CV<30	9.16537	2.99396	8.52	10.255	3.067	9.553
129	Glycerophospholipid	PC aa C42:0	Phosphatidylcholine diacyl C42:0	CV<30	CV<30	0.110783	0.0331888	0.105	0.137	0.026	0.136
130	Glycerophospholipid	PC aa C42:1	Phosphatidylcholine diacyl C42:1	CV<30	CV<30	0.0775591	0.0256724	0.073	0.102	0.021	0.1
131	Glycerophospholipid	PC aa C42:2	Phosphatidylcholine diacyl C42:2	CV<30	CV<30	0.108553	0.022602	0.107	0.138	0.021	0.136
132	Glycerophospholipid	PC aa C42:4	Phosphatidylcholine diacyl C42:4	CV<30	CV<30	0.129057	0.0290756	0.127	0.147	0.026	0.146
133	Glycerophospholipid	PC aa C42:5	Phosphatidylcholine diacyl C42:5	CV<30	CV<30	0.165149	0.045898	0.16	0.162	0.035	0.157
134	Glycerophospholipid	PC aa C42:6	Phosphatidylcholine diacyl C42:6	CV<30	CV<30	0.431532	0.0984314	0.409	0.305	0.066	0.294
135	Glycerophospholipid	PC ae C30:0	Phosphatidylcholine acyl-alkyl C30:0	CV<30	CV<30	0.243075	0.0743763	0.228	0.33	0.069	0.32
136	Glycerophospholipid	PC ae C30:1	Phosphatidylcholine acyl-alkyl C30:1	CV>30	CV>30	-	-	-	-	-	-
137	Glycerophospholipid	PC ae C30:2	Phosphatidylcholine acyl-alkyl C30:2	CV>30	CV>30	-	-	-	-	-	-
138	Glycerophospholipid	PC ae C32:1	Phosphatidylcholine acyl-alkyl C32:1	CV<30	CV<30	1.02121	0.225383	0.997	1.327	0.254	1.313
139	Glycerophospholipid	PC ae C32:2	Phosphatidylcholine acyl-alkyl C32:2	CV<30	CV<30	0.256013	0.0506815	0.252	0.368	0.066	0.365
140	Glycerophospholipid	PC ae C34:0	Phosphatidylcholine acyl-alkyl C34:0	CV<30	CV<30	0.48646	0.114467	0.476	0.631	0.123	0.63
141	Glycerophospholipid	PC ae C34:1	Phosphatidylcholine acyl-alkyl C34:1	CV<30	CV<30	4.48187	0.990032	4.42	4.849	0.891	4.84
142	Glycerophospholipid	PC ae C34:2	Phosphatidylcholine acyl-alkyl C34:2	CV<30	CV<30	5.44248	1.33452	5.31	5.508	1.227	5.369
143	Glycerophospholipid	PC ae C34:3	Phosphatidylcholine acyl-alkyl C34:3	CV<30	CV<30	2.48368	0.59566	2.45	2.749	0.563	2.697
144	Glycerophospholipid	PC ae C36:0	Phosphatidylcholine acyl-alkyl C36:0	CV<30	CV>30	0.215912	0.0627779	0.206	-	-	-
145	Glycerophospholipid	PC ae C36:1	Phosphatidylcholine acyl-alkyl C36:1	CV<30	CV<30	3.07795	0.860511	2.99	3.317	0.759	3.293
146	Glycerophospholipid	PC ae C36:2	Phosphatidylcholine acyl-alkyl C36:2	CV<30	CV<30	5.68679	1.53495	5.52	6.067	1.38	6.024
147	Glycerophospholipid	PC ae C36:3	Phosphatidylcholine acyl-alkyl C36:3	CV<30	CV<30	3.53229	0.855239	3.49	3.616	0.737	3.653
148	Glycerophospholipid	PC ae C36:4	Phosphatidylcholine acyl-alkyl C36:4	CV<30	CV<30	3.80088	0.880732	3.75	3.677	0.763	3.64
149	Glycerophospholipid	PC ae C36:5	Phosphatidylcholine acyl-alkyl C36:5	CV<30	CV<30	1.6132	0.37069	1.6	1.571	0.319	1.564
150	Glycerophospholipid	PC ae C38:0	Phosphatidylcholine acyl-alkyl C38:0	CV<30	CV<30	0.376808	0.103204	0.359	0.444	0.104	0.427
151	Glycerophospholipid	PC ae C38:1	Phosphatidylcholine acyl-alkyl C38:1	CV<30	CV<30	0.496831	0.131717	0.489	0.65	0.175	0.643
152	Glycerophospholipid	PC ae C38:2	Phosphatidylcholine acyl-alkyl C38:2	CV<30	CV<30	0.976133	0.228594	0.963	1.133	0.239	1.138
153	Glycerophospholipid	PC ae C38:3	Phosphatidylcholine acyl-alkyl C38:3	CV<30	CV<30	1.28034	0.336735	1.24	1.406	0.287	1.41
154	Glycerophospholipid	PC ae C38:4	Phosphatidylcholine acyl-alkyl C38:4	CV<30	CV<30	7.55764	1.7177	7.51	7.128	1.431	7.083
155	Glycerophospholipid	PC ae C38:5	Phosphatidylcholine acyl-alkyl C38:5	CV<30	CV<30	4.2425	0.985313	4.13	3.884	0.787	3.837
156	Glycerophospholipid	PC ae C38:6	Phosphatidylcholine acyl-alkyl C38:6	CV<30	CV<30	0.850172	0.17837	0.839	0.887	0.171	0.879
157	Glycerophospholipid	PC ae C40:1	Phosphatidylcholine acyl-alkyl C40:1	CV<30	CV<30	0.679938	0.241591	0.639	0.827	0.206	0.797
158	Glycerophospholipid	PC ae C40:2	Phosphatidylcholine acyl-alkyl C40:2	CV<30	CV<30	0.336117	0.0545684	0.336	0.42	0.067	0.419
159	Glycerophospholipid	PC ae C40:3	Phosphatidylcholine acyl-alkyl C40:3	CV<30	CV<30	0.419701	0.0914855	0.412	0.569	0.144	0.551
160	Glycerophospholipid	PC ae C40:4	Phosphatidylcholine acyl-alkyl C40:4	CV<30	CV<30	1.48753	0.310097	1.48	1.553	0.298	1.543
161	Glycerophospholipid	PC ae C40:5	Phosphatidylcholine acyl-alkyl C40:5	CV<30	CV<30	1.85937	0.406547	1.85	1.778	0.363	1.753
162	Glycerophospholipid	PC ae C40:6	Phosphatidylcholine acyl-alkyl C40:6	CV<30	CV<30	0.940334	0.212024	0.926	1	0.217	0.984
163	Glycerophospholipid	PC ae C42:0	Phosphatidylcholine acyl-akyl C42:0	CV<30	CV<30	0.399645	0.081334	0.392	0.532	0.088	0.517
164	Glycerophospholipid	PC ae C42:1	Phosphatidylcholine acyl-alkyl C42:1	CV<30	CV>30	0.646436	0.359762	0.546	-	-	-
165	Glycerophospholipid	PC ae C42:2	Phosphatidylcholine acyl-alkyl C42:2	CV<30	CV<30	0.347663	0.124553	0.328	0.397	0.099	0.388
166	Glycerophospholipid	PC ae C42:3	Phosphatidylcholine acyl-alkyl C42:3	CV<30	CV<30	0.166483	0.0564532	0.153	0.219	0.054	0.212
167	Glycerophospholipid	PC ae C42:4	Phosphatidylcholine acyl-alkyl C42:4	CV<30	CV<30	0.216194	0.0504691	0.212	0.225	0.047	0.224
168	Glycerophospholipid	PC ae C42:5	Phosphatidylcholine acyl-alkyl C42:5	CV<30	CV<30	0.562353	0.0760016	0.557	0.539	0.063	0.532
169	Glycerophospholipid	PC ae C44:3	Phosphatidylcholine acyl-alkyl C44:3	CV<30	CV>30	0.0999657	0.0518794	0.085	-	-	-
170	Glycerophospholipid	PC ae C44:4	Phosphatidylcholine acyl-alkyl C44:4	CV<30	CV<30	0.108685	0.0222423	0.106	0.11	0.018	0.109
171	Glycerophospholipid	PC ae C44:5	Phosphatidylcholine acyl-alkyl C44:5	CV<30	CV<30	0.190835	0.0443052	0.187	0.197	0.035	0.192
172	Glycerophospholipid	PC ae C44:6	Phosphatidylcholine acyl-alkyl C44:6	CV<30	CV<30	0.20646	0.0562876	0.198	0.199	0.047	0.194
173	Sphingomyelin	SM (OH) C14:1	Hydroxysphingomyeline C14:1	CV<30	CV<30	1.26425	0.26082	1.23	1.787	0.329	1.8
174	Sphingomyelin	SM (OH) C16:1	Hydroxysphingomyeline C16:1	CV<30	CV<30	1.95485	0.409891	1.92	2.669	0.544	2.643
175	Sphingomyelin	SM (OH) C22:1	Hydroxysphingomyeline C22:1	CV<30	CV<30	3.19581	0.657409	3.17	3.679	0.654	3.701
176	Sphingomyelin	SM (OH) C22:2	Hydroxysphingomyeline C22:2	CV<30	CV<30	1.21671	0.243213	1.19	1.509	0.273	1.483
177	Sphingomyelin	SM (OH) C24:1	Hydroxysphingomyeline C24:1	CV<30	CV<30	0.352795	0.096174	0.351	0.446	0.087	0.449
178	Sphingomyelin	SM C16:0	Sphingomyeline C16:0	CV<30	CV<30	57.7934	10.4692	56.9	76.395	13.105	76.319
179	Sphingomyelin	SM C16:1	Sphingomyeline C16:1	CV<30	CV<30	3.69212	0.942721	3.6	4.907	1.08	4.915
180	Sphingomyelin	SM C18:0	Sphingomyeline C18:0	CV<30	CV<30	13.9574	2.81563	13.8	16.606	3.164	16.369
181	Sphingomyelin	SM C18:1	Sphingomyeline C18:1	CV<30	CV<30	3.21704	0.688007	3.15	4.04	0.857	3.988
182	Sphingomyelin	SM C20:2	Sphingomyeline C20:2	CV<30	CV<30	0.252431	0.0914119	0.248	0.381	0.074	0.382
183	Sphingomyelin	SM C22:3	Sphingomyeline C22:3	CV>30	CV<30	-	-	-	2.713	0.888	2.724
184	Sphingomyelin	SM C24:0	Sphingomyeline C24:0	CV<30	CV<30	9.64991	1.826	9.67	11.495	2.087	11.457
185	Sphingomyelin	SM C24:1	Sphingomyeline C24:1	CV<30	CV<30	13.5166	2.24544	13.4	16.642	2.699	16.618
186	Sphingomyelin	SM C26:0	Sphingomyeline C26:0	CV>30	CV>30	-	-	-	-	-	-
187	Sphingomyelin	SM C26:1	Sphingomyeline C26:1	CV>30	CV<30	-	-	-	0.129	0.042	0.126
188	Sugars	H1	Hexose	CV<30	CV<30	5832.13	1614.94	5551	6131.89	1528.64	5909.35

## Sheet: Table_S8
Table S8. Narrow sense heritability (h2P) and genomic heritability (h2SNP) of the metabolite level. Estimates are provided for the Large White and Duroc pig populations. Negative estimates are not reported.
				Large White				Duroc
Metabolite number	Metabolite class/subclass	Metabolite abbreviation	Metabolite biochemical name	h2P	s.e.(h2P)	h2G	s.e.(h2G)	h2P	s.e.(h2P)	h2G	s.e.(h2G)
1	Acylcarnitine	C0	Carnitine	0.147974	0.0695371	0.228562	0.0650807	0.249573	0.135789	0.222424	0.115724
2	Acylcarnitine	C10	Decanoylcarnitine	0.029853	0.0440195	3.7567e-06	0.0373008	0.0717615	0.0951072	3.65282e-06	0.054414
3	Acylcarnitine	C10:1	Decenoylcarnitine	-	-	0.0288737	0.0374476	-	-	3.65282e-06	0.0658256
4	Acylcarnitine	C10:2	Decadienylcarnitine	-	-	0.0627987	0.0452285	-	-	0.00552098	0.0534377
5	Acylcarnitine	C12	Dodecanoylcarnitine	0.0219066	0.0384928	0.0468808	0.0369332	0.0943889	0.102214	0.024626	0.0518736
6	Acylcarnitine	C12:1	Dodecenoylcarnitine	0.0224631	0.0417845	0.0168349	0.0317436	0.0488086	0.0873386	0.0403826	0.0583482
7	Acylcarnitine	C12-DC	Dodecanedioylcarnitine	0.0231089	0.0421827	0.0371568	0.0339147	0.0659369	0.0837449	0.0283578	0.0627209
8	Acylcarnitine	C14	Tetradecanoylcarnitine	0.0101961	0.0369571	3.7567e-06	0.0298391	-	-	0.0738499	0.0858083
9	Acylcarnitine	C14:1	Tetradecenoylcarnitine	0.0335884	0.0449592	0.0755039	0.0471761	0.0103113	0.0708475	3.65282e-06	-
10	Acylcarnitine	C14:1-OH	Hydroxytetradecenoylcarnitine	0.0605748	0.0517788	0.00150178	0.0280664	-	-	0.117081	0.0984189
11	Acylcarnitine	C14:2	Tetradecadienylcarnitine	-	-	0.0359541	0.0362654	0.124578	0.110724	3.65282e-06	0.0776917
12	Acylcarnitine	C14:2-OH	Hydroxytetradecadienylcarnitine	0.00267165	0.0353448	0.0170691	0.0297765	0.0269952	0.0873597	3.65282e-06	-
13	Acylcarnitine	C16	Hexadecanoylcarnitine	0.0402935	0.0860435	0.0773039	0.0416545	0.290993	0.141346	0.0437365	0.089899
14	Acylcarnitine	C16:1	Hexadecadienylcarnitine	0.0794733	0.0559622	0.10594	0.0628309	0.0979483	0.118774	3.65282e-06	-
15	Acylcarnitine	C16:1-OH	Hydroxyhexadecenoylcarnitine	0.0808257	0.0563798	3.7567e-06	0.0462315	-	-	3.65282e-06	0.0599512
16	Acylcarnitine	C16:2	Hydroxyhexadecanoylcarnitine	-	-	0.0216799	0.0406481	-	-	0.0854453	0.0864892
17	Acylcarnitine	C16:2-OH	Hydroxyhexadecadienylcarnitine	0.0352629	0.0582513	3.7567e-06	0.0353341	0.118802	0.109814	0.160271	0.100816
18	Acylcarnitine	C16-OH	Hexadecenoylcarnitine	0.0298681	0.0487001	0.0221373	0.0359884	-	-	3.65282e-06	-
19	Acylcarnitine	C18	Octadecanoylcarnitine	0.117606	0.0635773	0.130663	0.0475357	0.182311	0.12391	0.281583	0.112568
20	Acylcarnitine	C18:1	Octadecenoylcarnitine	0.130367	0.0655138	0.123364	0.047334	0.321408	0.144806	3.65282e-06	0.0578829
21	Acylcarnitine	C18:1-OH	Hydroxyoctadecenoylcarnitine	0.0975904	0.0595853	0.0246212	0.0297886	0.00909505	0.0713984	0.380131	0.114722
22	Acylcarnitine	C18:2	Octadecadienylcarnitine	0.0670634	0.0406393	0.119171	0.0488195	0.562005	0.159179	0.081388	0.0788001
23	Acylcarnitine	C2	Acetylcarnitine	0.273197	0.0838871	0.261652	0.0617758	0.128972	0.111803	0.172203	0.102589
24	Acylcarnitine	C3	Propionylcarnitine	0.197674	0.0754731	0.217864	0.0631339	0.135084	0.113228	3.65282e-06	0.054156
25	Acylcarnitine	C3:1	Propenonylcarnitine	0.215098	0.0776692	3.7567e-06	0.04049	0.0402396	0.0835085	0.0460658	0.056606
26	Acylcarnitine	C3-DC (C4-OH)	Hydroxybutyrylcarnitine	-	-	0.226518	0.0543862	0.0481893	0.0865187	0.147207	0.0986727
27	Acylcarnitine	C3-OH	Hydroxypropionylcarnitine	-	-	0.0125113	0.0338302	-	-	3.65282e-06	0.061174
28	Acylcarnitine	C4	Butyrylcarnitine	0.00914754	0.0377326	0.186099	0.0672294	-	-	0.0288817	0.0573056
29	Acylcarnitine	C4:1	Butenylcarnitine	0.126214	0.0648872	0.0780536	0.0506044	0.0611698	0.091182	3.65282e-06	0.0861683
30	Acylcarnitine	C5	Valerylcarnitine	0.00933771	0.0377335	0.110561	0.0476125	-	-	3.65282e-06	0.331902
31	Acylcarnitine	C5:1	Tiglylcarnitine	0.0886509	0.0577198	0.0812443	0.041781	0.0167087	0.0742994	3.65282e-06	0.0525618
32	Acylcarnitine	C5:1-DC	Glutaconylcarnitine	0.101215	0.0603064	0.01882	0.0272098	-	-	-	-
33	Acylcarnitine	C5-DC (C6-OH)	Glutarylcarnitine	0.0449579	0.0476657	0.0270405	0.0349295	-	-	3.65282e-06	0.141449
34	Acylcarnitine	C5-M-DC	Methylglutarylcarnitine	-	-	3.7567e-06	-	-	-	3.65282e-06	-
35	Acylcarnitine	C5-OH (C3-DC-M)	Hydroxyvalerylcarnitine (Methylmalonylcarnitine)	-	-	0.0181279	0.0304623	-	-	-	-
36	Acylcarnitine	C6 (C4:1-DC)	Hexanoylcarnitine	-	-	3.7567e-06	0.0274759	0.0185651	0.0738112	3.65282e-06	0.273411
37	Acylcarnitine	C6:1	Hexenoylcarnitine	0.00886266	0.0376958	0.0141105	0.0313777	0.0900508	0.101384	0.024154	0.0570407
38	Acylcarnitine	C7-DC	Pimelylcarnitine	-	-	3.7567e-06	0.0319786	-	-	-	-
39	Acylcarnitine	C8	Octanoylcarnitine	0.012623	0.0390318	0.0225619	0.0312288	-	-	3.65282e-06	-
40	Acylcarnitine	C9	Nonaylcarnitine	0.0338277	0.0450192	0.0566365	0.0398167	-	-	-	-
41	Amino acid	Ala	Alanine	0.240982	0.0806733	0.29297	0.0598975	0.213237	0.130413	0.224665	0.0967196
42	Amino acid	Arg	Arginine	0.234109	0.0797667	0.213919	0.053626	0.23775	0.133565	0.30348	0.103572
43	Amino acid	Asn	Asparagine	0.270528	0.0846078	0.191021	0.0578939	0.00284861	0.0648127	0.0225159	0.0576521
45	Amino acid	Cit	Citrulline	0.335675	0.0890458	0.35365	0.0650995	0.284963	0.140387	0.170117	0.10307
46	Amino acid	Gln	Glutamine	0.278608	0.0843826	0.24338	0.0609246	0.0230774	0.0766522	0.204193	0.125401
47	Amino acid	Glu	Glutamate	0.188598	0.0743716	0.242951	0.0586019	0.104017	0.105416	0.27384	0.124564
48	Amino acid	Gly	Glycine	0.261177	0.0831758	0.251305	0.0609133	0.0552932	0.0894035	0.0355002	0.0571815
49	Amino acid	His	Histidine	0.310162	0.0872347	0.24558	0.0533735	0.0603194	0.0912189	0.271825	0.126049
50	Amino acid	Ile	Isoleucine	0.159088	0.0695667	0.189473	0.0573553	-	-	3.65282e-06	0.0641405
51	Amino acid	Leu	Leucine	0.157459	0.0698089	0.193996	0.0583658	0.00672739	0.0692205	0.0512058	0.0663122
52	Amino acid	Lys	Lysine	0.195364	0.0753433	0.219248	0.0602357	0.190561	0.125264	0.107906	0.0827605
53	Amino acid	Met	Methionine	0.293288	0.0856968	0.259745	0.0571927	-	-	0.0656492	0.112532
54	Amino acid	Orn	Ornithine	0.267548	0.0833436	0.33215	0.0635247	0.182101	0.123556	0.294954	0.12622
55	Amino acid	Phe	Phenylalanine	0.189331	0.0738588	0.191233	0.046044	0.031836	0.0803542	0.102321	0.122947
56	Amino acid	Pro	Proline	0.175477	0.0798487	0.304841	0.0665583	0.0112606	0.0717461	0.0468897	0.077861
57	Amino acid	Ser	Serine	0.153866	0.0699727	0.170314	0.0547425	0.202124	0.1274	0.228141	0.0981062
58	Amino acid	Thr	Threonine	0.365018	0.0912186	0.274188	0.064341	0.100945	0.104414	0.166989	0.13292
59	Amino acid	Trp	Tryptophan	0.194208	0.0750082	0.186613	0.0570526	0.208465	0.128809	0.209347	0.105255
60	Amino acid	Tyr	Tyrosine	0.437501	0.0948659	0.270731	0.054069	0.0202666	0.0742383	0.122261	0.104361
61	Amino acid	Val	Valine	0.121407	0.063972	0.135033	0.0506948	-	-	3.65282e-06	-
62	Biogenic amine	Ac-Orn	Acetylornithine	0.29403	0.0858396	0.47075	0.0709181	0.285032	0.140516	0.439486	0.148417
63	Biogenic amine	ADMA	Asymmetric dimethylarginine	0.123997	0.0647131	0.141543	0.0544676	0.0552392	0.0966647	0.115439	0.0746288
64	Biogenic amine	alpha-AAA	alpha-Aminoadipic acid	0.114558	0.0627353	0.113174	0.0428628	0.112714	0.107424	0.224872	0.132077
65	Biogenic amine	Carnosine	Carnosine	-	-	-	-	0.184955	0.128917	0.188198	0.0899071
66	Biogenic amine	Creatinine	Creatinine	0.293998	0.085745	0.271459	0.0618944	0.430689	0.16415	0.290121	0.105777
67	Biogenic amine	Histamine	Histamine	-	-	-	-	0.448894	0.155305	0.483996	0.128275
68	Biogenic amine	Kynurenine	Kynurenine	0.226708	0.0789955	0.375133	0.0703196	0.222582	0.131347	0.182034	0.124429
69	Biogenic amine	Met-SO	Methioninesulfoxide	0.145774	0.0681663	0.188779	0.0582922	-	-	0.117071	0.120762
73	Biogenic amine	Putrescine	Putrescine	0.0929178	0.0589211	0.178521	0.0601542	0.105512	0.105487	0.240218	0.116075
74	Biogenic amine	Sarcosine	Sarcosine	0.408237	0.0939782	0.418918	0.065794	-	-	-	-
76	Biogenic amine	Serotonin	Serotonin	0.203009	0.0762443	0.330212	0.0667698	0.529455	0.158291	0.51998	0.122505
77	Biogenic amine	Spermidine	Spermidine	0.0198548	0.0410457	3.7567e-06	0.0285296	0.171376	0.121619	0.144016	0.115681
78	Biogenic amine	Spermine	Spermine	0.217193	0.0779548	0.162501	0.0550037	0.203348	0.127621	0.195075	0.0922767
79	Biogenic amine	t4-OH-Pro	trans-4-Hydroxyproline	-	-	-	-	0.235523	0.13326	0.282662	0.125284
81	Biogenic amine	Taurine	Taurine	0.0552188	0.0505895	0.192495	0.0617425	0.0347182	0.0818374	0.128204	0.106892
82	Biogenic amine	total DMA	Sum of ADMA and SDMA	0.295994	0.0859998	0.200129	0.0609011	0.128328	0.109917	0.121402	0.0681825
83	Lysophosphatidylcholine	lysoPC a C14:0	lysoPhosphatidylcholine acyl C14:0	0.0412548	0.0468535	0.0740479	0.052709	-	-	0.0279932	0.0861847
84	Lysophosphatidylcholine	lysoPC a C16:0	lysoPhosphatidylcholine acyl C16:0	0.243988	0.0808839	0.252895	0.0625817	0.126575	0.111083	0.108656	0.0772305
85	Lysophosphatidylcholine	lysoPC a C16:1	lysoPhosphatidylcholine acyl C16:1	0.158345	0.0700495	0.239457	0.0635921	0.112361	0.107731	0.105839	0.0936083
86	Lysophosphatidylcholine	lysoPC a C17:0	lysoPhosphatidylcholine acyl C17:0	0.377802	0.0919394	0.301164	0.0649074	0.175899	0.122537	0.199315	0.100446
87	Lysophosphatidylcholine	lysoPC a C18:0	lysoPhosphatidylcholine acyl C18:0	0.259881	0.0825921	0.267676	0.0644894	0.180641	0.123841	0.209678	0.128129
88	Lysophosphatidylcholine	lysoPC a C18:1	lysoPhosphatidylcholine acyl C18:1	0.216423	0.0778429	0.246479	0.0640198	0.233753	0.132887	0.156792	0.089999
89	Lysophosphatidylcholine	lysoPC a C18:2	lysoPhosphatidylcholine acyl C18:2	0.272069	0.0837213	0.254027	0.0614372	0.0730113	0.100698	0.109283	0.144827
90	Lysophosphatidylcholine	lysoPC a C20:3	lysoPhosphatidylcholine acyl C20:3	0.409239	0.093552	0.376339	0.0625255	0.290123	0.141175	0.282185	0.117971
91	Lysophosphatidylcholine	lysoPC a C20:4	lysoPhosphatidylcholine acyl C20:4	0.152756	0.0691419	0.258436	0.0669277	0.205409	0.12859	0.11869	0.124137
98	Phosphatidylcholine	PC aa C26:0	Phosphatidylcholine diacyl C26:0	0.0188576	0.0410629	0.0507013	0.0423657	-	-	-	-
99	Phosphatidylcholine	PC aa C28:1	Phosphatidylcholine diacyl C28:1	0.236856	0.0801259	0.138605	0.0461053	-	-	0.058521	0.0872956
100	Phosphatidylcholine	PC aa C30:0	Phosphatidylcholine diacyl C30:0	0.246257	0.0812997	0.241914	0.0555856	0.354127	0.148238	0.250618	0.113488
101	Phosphatidylcholine	PC aa C30:2	Phosphatidylcholine diacyl C30:2	0.0522885	0.0503527	0.0163875	0.0317881	0.120779	0.109892	0.098736	0.0858357
102	Phosphatidylcholine	PC aa C32:0	Phosphatidylcholine diacyl C32:0	0.231171	0.0795349	0.221871	0.0572791	0.146074	0.115998	0.128706	0.0960499
103	Phosphatidylcholine	PC aa C32:1	Phosphatidylcholine diacyl C32:1	0.196611	0.0753088	0.213617	0.0611945	0.377305	0.150271	0.327156	0.107048
104	Phosphatidylcholine	PC aa C32:2	Phosphatidylcholine diacyl C32:2	0.263491	0.0829216	0.260515	0.0611097	0.323895	0.145468	0.137613	0.137611
105	Phosphatidylcholine	PC aa C32:3	Phosphatidylcholine diacyl C32:3	0.144464	0.0679565	0.0710433	0.0420575	0.0194375	0.074918	0.00228508	0.0601046
106	Phosphatidylcholine	PC aa C34:1	Phosphatidylcholine diacyl C34:1	0.235762	0.0799727	0.265587	0.0655592	0.450611	0.155496	0.371071	0.119842
107	Phosphatidylcholine	PC aa C34:2	Phosphatidylcholine diacyl C34:2	0.28434	0.0848443	0.25589	0.0606019	0.162783	0.119689	0.150849	0.113628
108	Phosphatidylcholine	PC aa C34:3	Phosphatidylcholine diacyl C34:3	0.261718	0.0827367	0.235041	0.0607628	0.17643	0.122578	0.147471	0.109729
109	Phosphatidylcholine	PC aa C34:4	Phosphatidylcholine diacyl C34:4	0.317808	0.0877943	0.279815	0.0631516	0.036175	0.0839592	0.0285991	0.104619
110	Phosphatidylcholine	PC aa C36:0	Phosphatidylcholine diacyl C36:0	0.0447479	0.0482103	0.0810963	0.0501753	-	-	0.315388	0.142893
111	Phosphatidylcholine	PC aa C36:1	Phosphatidylcholine diacyl C36:1	0.382397	0.0921555	0.371419	0.0664073	0.454254	0.15565	0.285119	0.0995605
112	Phosphatidylcholine	PC aa C36:2	Phosphatidylcholine diacyl C36:2	0.305225	0.0867374	0.314802	0.0681658	0.173661	0.122095	0.159478	0.121771
113	Phosphatidylcholine	PC aa C36:3	Phosphatidylcholine diacyl C36:3	0.302118	0.0864246	0.281861	0.0606733	0.159057	0.118829	0.150074	0.105713
114	Phosphatidylcholine	PC aa C36:4	Phosphatidylcholine diacyl C36:4	0.326013	0.0883231	0.350607	0.0656526	0.116437	0.108725	0.212998	0.11968
115	Phosphatidylcholine	PC aa C36:5	Phosphatidylcholine diacyl C36:5	0.180208	0.0731668	0.216846	0.0649377	0.211524	0.129404	0.179323	0.110742
116	Phosphatidylcholine	PC aa C36:6	Phosphatidylcholine diacyl C36:6	0.186951	0.0754311	0.159788	0.0600895	0.218625	0.130705	0.228035	0.115321
117	Phosphatidylcholine	PC aa C38:0	Phosphatidylcholine diacyl C38:0	0.353007	0.09034	0.28117	0.0639409	0.106937	0.106531	0.300629	0.129454
118	Phosphatidylcholine	PC aa C38:1	Phosphatidylcholine diacyl C38:1	0.248815	0.0816507	0.250627	0.064868	0.0851832	0.0989312	0.0962139	0.0814718
119	Phosphatidylcholine	PC aa C38:3	Phosphatidylcholine diacyl C38:3	0.446079	0.09522	0.447647	0.0632536	0.392055	0.151445	0.27068	0.105533
120	Phosphatidylcholine	PC aa C38:4	Phosphatidylcholine diacyl C38:4	0.445467	0.0952519	0.389599	0.0692223	0.389228	0.151606	0.247515	0.123743
121	Phosphatidylcholine	PC aa C38:5	Phosphatidylcholine diacyl C38:5	0.305917	0.0867228	0.353621	0.0623938	0.119386	0.109621	0.163328	0.12383
122	Phosphatidylcholine	PC aa C38:6	Phosphatidylcholine diacyl C38:6	0.28618	0.0851211	0.33479	0.0718398	0.731682	0.157236	0.578178	0.117823
123	Phosphatidylcholine	PC aa C40:1	Phosphatidylcholine diacyl C40:1	0.0580317	0.0514859	0.0576269	0.0433887	0.0587796	0.0911223	3.65282e-06	0.0788719
124	Phosphatidylcholine	PC aa C40:2	Phosphatidylcholine diacyl C40:2	0.420076	0.0944439	0.30248	0.0690769	0.150718	0.117258	0.109949	0.0843051
125	Phosphatidylcholine	PC aa C40:3	Phosphatidylcholine diacyl C40:3	0.263081	0.0833546	0.243459	0.0638512	0.0454603	0.0873306	0.0211873	0.0498755
126	Phosphatidylcholine	PC aa C40:4	Phosphatidylcholine diacyl C40:4	0.590804	0.0985542	0.506473	0.0644515	0.3008	0.142391	0.229589	0.0952143
127	Phosphatidylcholine	PC aa C40:5	Phosphatidylcholine diacyl C40:5	0.692264	0.0982891	0.521979	0.0632196	0.0455052	0.0863852	0.0896062	0.107267
128	Phosphatidylcholine	PC aa C40:6	Phosphatidylcholine diacyl C40:6	0.408585	0.0935284	0.392971	0.0705927	0.596136	0.159276	0.626694	0.111878
129	Phosphatidylcholine	PC aa C42:0	Phosphatidylcholine diacyl C42:0	0.207718	0.0769029	0.129471	0.0517253	0.0483822	0.0875731	0.0515034	0.0815728
130	Phosphatidylcholine	PC aa C42:1	Phosphatidylcholine diacyl C42:1	0.291921	0.0856604	0.172888	0.0534776	0.135763	0.113923	0.115818	0.124369
131	Phosphatidylcholine	PC aa C42:2	Phosphatidylcholine diacyl C42:2	0.163567	0.0730709	0.187869	0.0586163	-	-	0.0257642	0.0826449
132	Phosphatidylcholine	PC aa C42:4	Phosphatidylcholine diacyl C42:4	0.373054	0.0922822	0.321092	0.0634795	-	-	0.0994414	0.130376
133	Phosphatidylcholine	PC aa C42:5	Phosphatidylcholine diacyl C42:5	0.296212	0.086247	0.357448	0.0677824	0.360231	0.149073	0.30471	0.125252
134	Phosphatidylcholine	PC aa C42:6	Phosphatidylcholine diacyl C42:6	0.148505	0.0689248	0.254962	0.068137	0.194791	0.126261	0.202896	0.110498
135	Phosphatidylcholine	PC ae C30:0	Phosphatidylcholine acyl-akyl C30:0	0.243984	0.0809459	0.196442	0.0548221	-	-	0.0755849	0.121342
138	Phosphatidylcholine	PC ae C32:1	Phosphatidylcholine acyl-akyl C32:1	0.324648	0.0883088	0.292561	0.0646223	0.24083	0.134552	0.143342	0.110049
139	Phosphatidylcholine	PC ae C32:2	Phosphatidylcholine acyl-akyl C32:2	0.346075	0.0900261	0.251853	0.0612343	0.125756	0.111474	0.10771	0.107326
140	Phosphatidylcholine	PC ae C34:0	Phosphatidylcholine acyl-akyl C34:0	0.400458	0.0932334	0.313125	0.0651888	-	-	0.0580872	0.105766
141	Phosphatidylcholine	PC ae C34:1	Phosphatidylcholine acyl-akyl C34:1	0.428236	0.0944871	0.436624	0.0651273	0.296819	0.141966	0.252743	0.139166
142	Phosphatidylcholine	PC ae C34:2	Phosphatidylcholine acyl-akyl C34:2	0.428143	0.09452	0.437547	0.0628975	0.453542	0.155723	0.421929	0.144881
143	Phosphatidylcholine	PC ae C34:3	Phosphatidylcholine acyl-akyl C34:3	0.539697	0.0978678	0.435449	0.0626835	0.297131	0.14216	0.382222	0.127437
144	Phosphatidylcholine	PC ae C36:0	Phosphatidylcholine acyl-akyl C36:0	0.186061	0.0744625	0.182288	0.0529455	-	-	-	-
145	Phosphatidylcholine	PC ae C36:1	Phosphatidylcholine acyl-akyl C36:1	0.344775	0.0897119	0.341372	0.065521	0.207911	0.128538	0.152508	0.0962574
146	Phosphatidylcholine	PC ae C36:2	Phosphatidylcholine acyl-akyl C36:2	0.334954	0.0890266	0.284914	0.0633905	0.159804	0.119286	0.117044	0.0977518
147	Phosphatidylcholine	PC ae C36:3	Phosphatidylcholine acyl-akyl C36:3	0.428367	0.0944866	0.412459	0.0641153	0.217859	0.130518	0.267228	0.14668
148	Phosphatidylcholine	PC ae C36:4	Phosphatidylcholine acyl-akyl C36:4	0.429289	0.0945622	0.40968	0.0611625	0.307882	0.14338	0.293815	0.143359
149	Phosphatidylcholine	PC ae C36:5	Phosphatidylcholine acyl-akyl C36:5	0.476779	0.0963971	0.414707	0.0631979	0.380185	0.150649	0.384557	0.119759
150	Phosphatidylcholine	PC ae C38:0	Phosphatidylcholine acyl-akyl C38:0	0.232593	0.0799634	0.193128	0.0636059	0.384968	0.151325	0.252013	0.118263
151	Phosphatidylcholine	PC ae C38:1	Phosphatidylcholine acyl-akyl C38:1	0.244981	0.0813876	0.218911	0.0607825	0.090801	0.101389	0.0521687	0.0632181
152	Phosphatidylcholine	PC ae C38:2	Phosphatidylcholine acyl-akyl C38:2	0.398975	0.093193	0.351811	0.0659696	0.124511	0.111125	0.0851625	0.103693
153	Phosphatidylcholine	PC ae C38:3	Phosphatidylcholine acyl-akyl C38:3	0.323816	0.0881737	0.370054	0.0652339	0.131221	0.112728	0.11288	0.10701
154	Phosphatidylcholine	PC ae C38:4	Phosphatidylcholine acyl-akyl C38:4	0.47296	0.0962258	0.398376	0.0660493	0.149212	0.116581	0.154381	0.097099
155	Phosphatidylcholine	PC ae C38:5	Phosphatidylcholine acyl-akyl C38:5	0.464623	0.0959586	0.403017	0.063309	0.221886	0.131116	0.197218	0.121743
156	Phosphatidylcholine	PC ae C38:6	Phosphatidylcholine acyl-akyl C38:6	0.460031	0.0958439	0.365199	0.0628708	0.372773	0.150079	0.31852	0.122367
157	Phosphatidylcholine	PC ae C40:1	Phosphatidylcholine acyl-akyl C40:1	0.216047	0.0777787	0.227237	0.0611463	0.246174	0.135157	0.190305	0.111635
158	Phosphatidylcholine	PC ae C40:2	Phosphatidylcholine acyl-akyl C40:2	0.265898	0.0843879	0.20664	0.0543849	-	-	3.65282e-06	0.107919
159	Phosphatidylcholine	PC ae C40:3	Phosphatidylcholine acyl-akyl C40:3	0.369555	0.0915289	0.31976	0.066982	-	-	3.65282e-06	0.0702456
160	Phosphatidylcholine	PC ae C40:4	Phosphatidylcholine acyl-akyl C40:4	0.611632	0.0986548	0.465658	0.0664617	0.0722051	0.0957954	0.0757345	0.0866859
161	Phosphatidylcholine	PC ae C40:5	Phosphatidylcholine acyl-akyl C40:5	0.510357	0.0972616	0.421132	0.0651088	0.177878	0.12289	0.137954	0.0851706
162	Phosphatidylcholine	PC ae C40:6	Phosphatidylcholine acyl-akyl C40:6	0.462739	0.0959333	0.3668	0.066642	0.482146	0.156897	0.407535	0.112007
163	Phosphatidylcholine	PC ae C42:0	Phosphatidylcholine acyl-akyl C42:0	0.175413	0.0726549	0.206215	0.0560051	0.480243	0.156862	0.178838	0.0932613
164	Phosphatidylcholine	PC ae C42:1	Phosphatidylcholine acyl-akyl C42:1	0.220439	0.0783067	0.222326	0.0619655	-	-	-	-
165	Phosphatidylcholine	PC ae C42:2	Phosphatidylcholine acyl-akyl C42:2	0.25526	0.0821795	0.230562	0.0631878	0.0214095	0.0763596	0.0358908	0.0602462
166	Phosphatidylcholine	PC ae C42:3	Phosphatidylcholine acyl-akyl C42:3	0.160145	0.0703875	0.136177	0.0671442	-	-	0.0635333	0.0727381
167	Phosphatidylcholine	PC ae C42:4	Phosphatidylcholine acyl-akyl C42:4	0.332083	0.0889806	0.347408	0.0651238	0.181561	0.124362	0.0990522	0.0793396
168	Phosphatidylcholine	PC ae C42:5	Phosphatidylcholine acyl-akyl C42:5	0.402161	0.093423	0.390977	0.0706807	0.224766	0.131953	0.115811	0.0855903
169	Phosphatidylcholine	PC ae C44:3	Phosphatidylcholine acyl-akyl C44:3	0.137351	0.0668152	0.173446	0.0619805	-	-	-	-
170	Phosphatidylcholine	PC ae C44:4	Phosphatidylcholine acyl-akyl C44:4	0.102503	0.06072	0.135058	0.0582954	-	-	3.65282e-06	-
171	Phosphatidylcholine	PC ae C44:5	Phosphatidylcholine acyl-akyl C44:5	0.464528	0.0960347	0.386246	0.0624121	0.128009	0.111475	0.105677	0.0825579
172	Phosphatidylcholine	PC ae C44:6	Phosphatidylcholine acyl-akyl C44:6	0.367671	0.0912158	0.42269	0.0681505	0.3796	0.150297	0.311084	0.101517
173	Sphingomyelin	SM (OH) C14:1	Hydroxysphingomyeline C14:1	0.437919	0.09484	0.377409	0.0596145	0.0310229	0.0806912	0.161311	0.118784
174	Sphingomyelin	SM (OH) C16:1	Hydroxysphingomyeline C16:1	0.487281	0.096763	0.400568	0.0586065	0.360921	0.148947	0.333201	0.107663
175	Sphingomyelin	SM (OH) C22:1	Hydroxysphingomyeline C22:1	0.428807	0.0944423	0.306382	0.0581606	0.384883	0.151085	0.320392	0.118161
176	Sphingomyelin	SM (OH) C22:2	Hydroxysphingomyeline C22:2	0.32482	0.0880643	0.236929	0.0521362	0.311841	0.143902	0.269517	0.125346
177	Sphingomyelin	SM (OH) C24:1	Hydroxysphingomyeline C24:1	0.269715	0.0836015	0.230481	0.052923	0.200222	0.127231	0.248288	0.101238
178	Sphingomyelin	SM C16:0	Sphingomyeline C16:0	0.334542	0.0889627	0.27145	0.0570849	0.178355	0.122898	0.197251	0.123897
179	Sphingomyelin	SM C16:1	Sphingomyeline C16:1	0.325745	0.0882369	0.321068	0.0617522	0.370001	0.149867	0.321616	0.121419
180	Sphingomyelin	SM C18:0	Sphingomyeline C18:0	0.41254	0.0937882	0.33539	0.059127	0.172611	0.121991	0.196427	0.145929
181	Sphingomyelin	SM C18:1	Sphingomyeline C18:1	0.412261	0.093756	0.302664	0.0596633	0.24507	0.135069	0.244789	0.155953
182	Sphingomyelin	SM C20:2	Sphingomyeline C20:2	0.193356	0.0753937	0.203012	0.0561386	0.14828	0.117769	0.132133	0.109216
183	Sphingomyelin	SM C22:3	Sphingomyeline C22:3	-	-	-	-	0.116017	0.108521	0.221787	0.126825
184	Sphingomyelin	SM C24:0	Sphingomyeline C24:0	0.235163	0.0799074	0.254386	0.0529391	0.294813	0.14172	0.235769	0.114046
185	Sphingomyelin	SM C24:1	Sphingomyeline C24:1	0.108977	0.0619295	0.120685	0.0564558	0.0802899	0.0980354	0.15352	0.105973
187	Sphingomyelin	SM C26:1	Sphingomyeline C26:1	-	-	-	-	-	-	3.65282e-06	-
188	Sugars	H1	Hexose	0.290277	0.110592	0.0685494	0.0412432	0.2625	0.181537	0.02	-

## Sheet: Table_S9
Table S9. All genetic association signals obtained in the Large White and Duroc pig populations. Results include the study of both single metabolites and metabolite ratios.
GWAS approach1	Breed	Metabolite or metabolite ratio	SSC	Marker	Position2	Minor Allele	Major Allele	MAF3	Beta4	s.e. of beta	P	p-gain5	No. of pigs with different genotypes6	PVE7
Ratio	Duroc	PC aa C32:0 / PC aa C34:4	1	ALGA0001156	13609429	G	A	0.233	-0.239469	0.0395584	4.50559e-09	1.39718e+06	14/105/167	11.3578
Ratio	Duroc	PC aa C32:0 / PC aa C34:4	1	ALGA0001160	13637577	G	A	0.267	-0.21878	0.0375598	1.55626e-08	1.51623e+06	20/113/153	10.6051
Ratio	Duroc	PC aa C32:0 / PC ae C32:2	1	ALGA0001160	13637577	G	A	0.267	-0.134585	0.0244634	8.45461e-08	279095	20/113/153	9.56983
Ratio	Duroc	PC aa C32:0 / PC aa C34:4	1	DRGA0000138	13639698	G	A	0.267	-0.21878	0.0375598	1.55626e-08	1.51623e+06	20/113/153	10.6051
Ratio	Duroc	PC aa C32:0 / PC ae C32:2	1	DRGA0000138	13639698	G	A	0.267	-0.134585	0.0244634	8.45461e-08	279095	20/113/153	9.56983
Ratio	Duroc	PC aa C32:0 / PC aa C34:4	1	MARC0082193	13662996	A	G	0.274	-0.213628	0.0377022	3.60227e-08	723330	20/117/149	10.0928
Single	Large White	Orn	1	H3GA0001339	30847542	C	A	0.388	0.0895062	0.0175855	4.49278e-07	-	128/354/305	3.1868
Single	Large White	Orn	1	ALGA0002334	31162256	A	G	0.319	0.0927749	0.0184123	5.82271e-07	-	92/317/377	3.12907
Single	Large White	Orn	1	ASGA0002086	31190843	G	A	0.315	0.0929994	0.0185608	6.71409e-07	-	89/318/380	3.09139
Single	Large White	Orn	1	ALGA0002350	31338809	A	G	0.375	0.0929892	0.0175324	1.47667e-07	-	122/347/318	3.45108
Ratio	Large White	Arg / Orn	1	H3GA0001355	31475270	G	A	0.337	0.0846822	0.0126689	4.40868e-11	3.38858e+06	89/353/345	5.37218
Single	Large White	Arg	1	H3GA0001359	31528591	A	G	0.48	0.0573718	0.0115869	9.02602e-07	-	187/381/219	3.02111
Ratio	Large White	Arg / Orn	1	H3GA0001359	31528591	A	G	0.48	0.093108	0.0113178	7.99979e-16	1.12828e+09	187/381/219	7.91852
Single	Large White	Orn	1	DRGA0000472	31633926	A	G	0.384	0.0863125	0.017284	7.30398e-07	-	127/350/310	3.07138
Single	Large White	Orn	1	DIAS0004542	31740851	C	A	0.489	0.0858185	0.0168209	4.22252e-07	-	192/385/210	3.20154
Ratio	Large White	Arg / Orn	1	DIAS0004542	31740851	C	A	0.489	-0.0924898	0.0120553	5.0306e-14	8.39366e+06	192/385/210	6.95874
Single	Large White	Orn	1	ALGA0116136	31763655	A	G	0.396	0.0865117	0.017266	6.71405e-07	-	132/360/295	3.09139
Single	Large White	Orn	1	DIAS0002497	31868855	A	G	0.368	0.105172	0.0168007	6.3393e-10	-	109/361/317	4.74317
Ratio	Large White	Arg / Orn	1	DIAS0002497	31868855	A	G	0.368	-0.122482	0.0115215	9.49482e-25	667659032538000	109/361/317	12.5568
Single	Large White	Orn	1	INRA0001633	31884853	G	A	0.315	0.0957298	0.0178694	1.11232e-07	-	74/348/365	3.51837
Ratio	Large White	Arg / Orn	1	INRA0001633	31884853	G	A	0.315	-0.0952171	0.0126665	1.53231e-13	725909	74/348/365	6.69926
Ratio	Duroc	Arg / Orn	1	INRA0001633	31884853	G	A	0.192	-0.132409	0.0209207	9.67042e-10	360694	9/92/185	12.2853
Ratio	Large White	Arg / Orn	1	DRGA0000478	31932169	C	G	0.055	-0.151812	0.0217425	6.20245e-12	2.16843e+06	8/68/684	6.02807
Ratio	Duroc	Arg / Orn	1	ALGA0002395	31955676	G	A	0.2	-0.138327	0.0204565	7.82498e-11	1.83336e+06	9/96/180	13.8256
Single	Large White	Orn	1	H3GA0001369	31969926	A	G	0.394	0.0930948	0.0171053	7.03378e-08	-	120/380/287	3.6272
Ratio	Large White	Arg / Orn	1	H3GA0001369	31969926	A	G	0.394	-0.110495	0.0118887	1.44007e-19	4.88433e+11	120/380/287	9.89042
Ratio	Duroc	Arg / Orn	1	H3GA0001369	31969926	A	G	0.201	-0.139955	0.020454	4.84325e-11	1.4917e+06	9/97/180	14.0674
Ratio	Duroc	Arg / Orn	1	ALGA0002394	31995475	G	A	0.191	-0.133347	0.0209015	7.24727e-10	290713	9/91/186	12.4583
Ratio	Large White	Arg / Orn	1	ASGA0002142	32066172	G	A	0.325	0.0954618	0.0117976	2.24132e-15	3.58136e+09	82/347/358	7.6805
Ratio	Large White	Arg / Orn	1	ALGA0002427	32268927	A	G	0.302	-0.0874718	0.0130717	4.20152e-11	932378	69/337/381	5.38351
Ratio	Large White	Arg / Orn	1	H3GA0001392	32648580	C	A	0.469	-0.0829992	0.0126015	8.26041e-11	1.38112e+06	165/408/214	5.22424
Ratio	Large White	Arg / Orn	1	H3GA0001394	32733316	A	G	0.33	-0.0822495	0.0132799	9.4944e-10	334710	74/372/341	4.64766
Ratio	Large White	Arg / Orn	1	ALGA0002465	32869607	A	G	0.478	-0.0823755	0.0126633	1.38434e-10	2.46917e+06	171/411/205	5.10249
Ratio	Large White	Arg / Orn	1	ALGA0002480	33018616	G	A	0.43	0.0790308	0.0125391	4.87792e-10	161785	140/397/250	4.8051
Ratio	Large White	Arg / Orn	1	ASGA0002203	33146872	A	G	0.41	-0.0739722	0.0120539	1.33654e-09	597747	120/406/261	4.56677
Ratio	Large White	Arg / Orn	1	ALGA0002493	33220521	A	C	0.284	-0.107402	0.0131642	1.34638e-15	8.21472e+09	63/321/403	7.7983
Single	Large White	Orn	1	ALGA0002505	33304358	C	A	0.305	0.105182	0.0187418	2.77353e-08	-	71/338/378	3.84809
Ratio	Large White	Arg / Orn	1	ALGA0002505	33304358	C	A	0.305	-0.130121	0.0128893	1.30626e-22	212325944049000	71/338/378	11.465
Ratio	Large White	Arg / Lys	1	ALGA0002505	33304358	C	A	0.305	-0.0757989	0.0116837	1.54555e-10	2.18927e+06	71/338/378	5.0765
Single	Large White	Orn	1	ASGA0002251	33616454	A	G	0.303	0.103302	0.0181121	1.66403e-08	-	69/339/379	3.9693
Single	Large White	Arg	1	ASGA0002251	33616454	A	G	0.303	-0.0631943	0.0131041	1.70381e-06	-	69/339/379	2.87024
Ratio	Large White	Arg / Orn	1	ASGA0002251	33616454	A	G	0.303	-0.142597	0.0120359	6.67805e-30	2.49179e+21	69/339/379	15.1361
Single	Large White	Orn	1	ALGA0002557	33722398	A	G	0.229	0.108143	0.020609	1.98792e-07	-	34/292/461	3.38047
Ratio	Large White	Arg / Orn	1	ALGA0002557	33722398	A	G	0.229	-0.138253	0.0139932	8.9598e-22	221870788130000	34/292/461	11.0347
Single	Large White	Orn	1	MARC0056093	33766231	C	A	0.294	0.112652	0.0181905	9.52959e-10	-	64/335/388	4.64679
Ratio	Large White	Arg / Orn	1	MARC0056093	33766231	C	A	0.294	-0.141437	0.012216	9.99983e-29	9.52975e+18	64/335/388	14.5541
Single	Large White	Orn	1	ALGA0002556	33779835	A	G	0.264	0.105645	0.0188357	2.82694e-08	-	52/311/424	3.84357
Ratio	Large White	Arg / Orn	1	ALGA0002556	33779835	A	G	0.264	-0.118288	0.0130292	8.77829e-19	3.22037e+10	52/311/424	9.48009
Ratio	Large White	Arg / Orn	1	ASGA0002260	33839922	A	G	0.384	-0.0955222	0.0124205	4.39672e-14	8.708e+08	106/392/288	6.99834
Single	Large White	Orn	1	CADI0000177	33915682	A	G	0.235	0.117757	0.0198594	4.55459e-09	-	38/294/455	4.27647
Ratio	Large White	Arg / Orn	1	CADI0000177	33915682	A	G	0.235	-0.135907	0.0134885	1.55665e-22	29258978266100	38/294/455	11.4259
Single	Large White	Orn	1	ALGA0002567	34025396	A	G	0.252	0.0987672	0.0195873	5.71527e-07	-	45/306/436	3.12964
Ratio	Large White	Arg / Orn	1	ALGA0002567	34025396	A	G	0.252	-0.120492	0.0135356	3.77336e-18	151463641319	45/306/436	9.14786
Single	Large White	Orn	1	DRGA0000537	34128045	G	C	0.309	0.105496	0.0179028	5.64142e-09	-	75/327/371	4.29901
Ratio	Large White	Arg / Orn	1	DRGA0000537	34128045	G	C	0.309	-0.1298	0.0122451	1.26423e-24	4462341079030000	75/327/371	12.6912
Single	Large White	Orn	1	ASGA0002268	34324325	C	A	0.424	0.0823438	0.0168407	1.22652e-06	-	141/385/261	2.94829
Ratio	Large White	Arg / Orn	1	ASGA0002268	34324325	C	A	0.424	-0.0901813	0.0121007	2.42583e-13	5.05609e+06	141/385/261	6.59208
Single	Large White	Orn	1	H3GA0001440	34609595	A	G	0.419	0.0848807	0.0167479	5.01574e-07	-	140/380/267	3.16065
Ratio	Large White	Arg / Orn	1	H3GA0001440	34609595	A	G	0.419	-0.091519	0.0120387	8.3437e-14	6.01142e+06	140/380/267	6.84094
Ratio	Large White	Arg / Orn	1	ASGA0002283	34860135	G	A	0.334	-0.0807698	0.0130967	1.11311e-09	351802	81/364/342	4.61004
Single	Large White	Orn	1	ASGA0002320	36529754	A	C	0.156	0.124166	0.0237857	2.2919e-07	-	24/188/546	3.47027
Ratio	Large White	Arg / Orn	1	ASGA0002320	36529754	A	C	0.156	-0.131103	0.0168321	2.14482e-14	1.06858e+07	24/188/546	7.41047
Single	Large White	Orn	1	ASGA0002356	37320655	G	A	0.227	0.0994469	0.0197422	5.86584e-07	-	48/262/477	3.12346
Single	Large White	Orn	1	DRGA0000591	37381311	A	G	0.391	0.0849057	0.0167063	4.66826e-07	-	124/367/296	3.17771
Ratio	Large White	Arg / Orn	1	DRGA0000591	37381311	A	G	0.391	-0.0896145	0.0120058	2.23319e-13	2.09039e+06	124/367/296	6.61139
Single	Large White	Orn	1	ALGA0002699	37567095	A	C	0.292	0.0937133	0.0183167	3.92287e-07	-	80/300/407	3.21902
Single	Large White	C14:2	1	H3GA0001989	71563587	C	A	0.298	0.253743	0.0515516	1.04424e-06	-	71/327/389	2.98649
Ratio	Duroc	Ala / Spermine	1	MARC0081058	114339448	G	A	0.166	0.670338	0.091296	2.25631e-12	8.15436e+08	13/69/204	15.8605
Ratio	Duroc	Ala / Spermine	1	DIAS0000460	114430026	G	A	0.161	0.670679	0.0918971	2.97786e-12	3.40691e+08	13/66/207	15.6996
Ratio	Duroc	Ala / Spermine	1	ALGA0005631	114573450	G	A	0.166	0.680473	0.091062	9.92469e-13	1.67759e+09	13/69/204	16.3352
Single	Duroc	PC ae C34:3	1	ALGA0005903	125723936	G	A	0.358	-0.106094	0.0220448	2.4307e-06	-	44/117/125	6.13174
Single	Duroc	PC ae C34:3	1	ALGA0005905	125774728	A	C	0.358	-0.106094	0.0220448	2.4307e-06	-	44/117/125	6.13174
Single	Duroc	PC ae C34:3	1	ALGA0005956	127957580	A	C	0.388	-0.114676	0.0219462	3.38598e-07	-	44/134/108	6.53365
Single	Duroc	PC ae C34:3	1	ALGA0005957	128029101	G	C	0.388	-0.114676	0.0219462	3.38598e-07	-	44/134/108	6.53365
Ratio	Duroc	SM C16:0 / SM C18:0	1	ASGA0004539	129869498	G	A	0.304	0.216674	0.0323316	1.11894e-10	709614	20/134/132	13.5721
Ratio	Duroc	SM C16:0 / SM C18:0	1	ALGA0005984	130044175	C	G	0.304	0.216674	0.0323316	1.11894e-10	709614	20/134/132	13.5721
Ratio	Duroc	SM C16:0 / SM C18:0	1	ALGA0005986	130488207	G	A	0.31	0.238332	0.03281	3.68489e-12	1.67449e+07	19/131/123	16.1975
Ratio	Duroc	SM C16:0 / SM C18:0	1	ALGA0005991	130578101	C	A	0.304	0.231304	0.0321976	6.05908e-12	1.05157e+07	20/134/132	15.2865
Ratio	Duroc	SM C16:0 / SM C18:0	1	ASGA0004549	130611566	A	G	0.302	0.232165	0.0324955	7.72675e-12	1.04776e+07	19/135/132	15.1447
Ratio	Duroc	SM C16:0 / SM C18:0	1	M1GA0001121	131036674	G	A	0.304	0.231304	0.0321976	6.05908e-12	1.05157e+07	20/134/132	15.2865
Ratio	Duroc	SM C16:0 / SM C18:0	1	INRA0004224	131047558	C	A	0.304	0.231304	0.0321976	6.05908e-12	1.05157e+07	20/134/132	15.2865
Ratio	Large White	C4 / C5	1	ALGA0006012	131201231	A	G	0.189	0.067307	0.0121899	4.57357e-08	177812	32/233/522	3.72938
Ratio	Duroc	SM C16:0 / SM C18:0	1	H3GA0002791	132591965	A	G	0.295	0.214452	0.0328233	2.99226e-10	429333	20/129/137	12.9871
Single	Duroc	PC ae C34:3	1	DRGA0001536	133513858	A	G	0.302	-0.115229	0.0242514	3.22204e-06	-	21/131/134	5.9833
Single	Duroc	PC ae C34:3	1	ALGA0006071	133696865	T	A	0.295	-0.118219	0.0242547	1.82724e-06	-	19/127/134	6.38318
Ratio	Duroc	SM C16:0 / SM C18:0	1	ALGA0006071	133696865	T	A	0.295	0.217854	0.0322286	7.93454e-11	220922	19/127/134	14.0295
Single	Duroc	PC ae C34:3	1	INRA0004289	134597593	A	C	0.302	-0.115229	0.0242514	3.22204e-06	-	21/131/134	5.9833
Single	Duroc	PC ae C34:3	1	ALGA0006089	136413390	G	A	0.302	-0.115229	0.0242514	3.22204e-06	-	21/131/134	5.9833
Ratio	Large White	PC aa C34:4 / lysoPC a C16:0	1	MARC0065533	253959579	A	C	0.063	0.557435	0.100328	3.78142e-08	548568	2/95/690	3.77452
Single	Large White	Cit	1	ASGA0008030	270545489	A	G	0.454	-0.141175	0.0245179	1.22195e-08	-	173/368/246	4.04253
Single	Large White	Cit	1	ALGA0010839	270610430	G	A	0.456	-0.148393	0.0251567	5.44679e-09	-	159/399/229	4.23408
Single	Large White	Cit	1	ASGA0008038	270725631	G	A	0.49	-0.142751	0.023892	3.49412e-09	-	199/374/214	4.33926
Single	Large White	Cit	1	ASGA0008049	270804825	A	G	0.495	-0.126943	0.0256755	9.36032e-07	-	192/395/200	3.01247
Ratio	Large White	PC ae C38:4 / PC ae C40:5	1	M1GA0001939	272595152	A	G	0.328	0.0280852	0.00576418	1.33491e-06	196023	90/337/360	2.92818
Ratio	Large White	PC ae C38:4 / PC ae C40:5	1	MARC0025058	272699189	C	A	0.438	0.0292465	0.0054826	1.25571e-07	610738	149/391/247	3.48957
Ratio	Large White	PC ae C38:4 / PC ae C40:5	1	MARC0072424	272712128	A	G	0.266	0.032711	0.00619284	1.6567e-07	1.44108e+06	59/300/428	3.42376
Single	Large White	Sarcosine	1	M1GA0002011	273242436	G	A	0.494	0.0389698	0.0069955	3.48965e-08	-	189/399/199	3.79358
Ratio	Duroc	PC aa C36:3 / SM C22:3	2	DIAS0000626	9419687	A	C	0.483	-0.066535	0.0115452	2.16283e-08	230009	65/146/75	10.4045
Single	Duroc	PC ae C42:0	2	ASGA0104083	9435996	G	A	0.462	0.108909	0.022927	3.23968e-06	-	61/142/83	7.31278
Ratio	Duroc	PC aa C38:3 / PC aa C40:4	2	ASGA0090054	9495473	A	C	0.486	0.106357	0.0161247	2.08114e-10	374808	67/144/75	13.2035
Single	Duroc	PC ae C42:0	2	ALGA0011760	9588087	G	A	0.463	0.111237	0.0228954	1.96498e-06	-	64/137/85	7.62421
Ratio	Duroc	PC aa C38:3 / PC aa C40:4	2	ALGA0011760	9588087	G	A	0.463	0.113329	0.0160234	1.20115e-11	3.94383e+06	64/137/85	14.8868
Ratio	Duroc	PC aa C38:3 / PC aa C40:4	2	ASGA0008896	9614500	G	A	0.458	-0.118449	0.0168475	1.55269e-11	3.16234e+06	57/148/81	10.572
Ratio	Duroc	PC aa C36:3 / SM C22:3	2	ASGA0008896	9614500	G	A	0.458	-0.0696875	0.0117582	8.99732e-09	394266	57/148/81	10.6255
Ratio	Duroc	PC aa C34:2 / PC aa C36:3	2	ASGA0008896	9614500	G	A	0.458	0.0217079	0.00372277	1.50497e-08	235707	57/148/81	14.7364
Ratio	Duroc	PC aa C36:3 / PC aa C36:4	2	ASGA0008896	9614500	G	A	0.458	-0.0539816	0.00928371	1.64324e-08	215874	57/148/81	10.9384
Ratio	Duroc	PC aa C38:3 / PC aa C40:4	2	ALGA0011764	9687593	A	G	0.498	-0.128485	0.0163491	8.22804e-14	3.01126e+08	72/141/73	10.3151
Ratio	Duroc	PC ae C36:5 / PC ae C38:6	2	ALGA0011764	9687593	A	G	0.498	0.0970753	0.0154329	1.2054e-09	4.7221e+07	72/141/73	13.0298
Ratio	Duroc	PC aa C36:3 / PC aa C36:4	2	ALGA0011764	9687593	A	G	0.498	-0.0587516	0.00897537	2.78548e-10	1.0991e+07	72/141/73	11.3236
Ratio	Duroc	PC aa C36:4 / PC aa C36:5	2	ALGA0011764	9687593	A	G	0.498	1.74304	0.288427	4.76726e-09	5.86435e+06	72/141/73	12.153
Ratio	Duroc	PC aa C36:3 / SM C22:3	2	ALGA0011764	9687593	A	G	0.498	-0.0733644	0.0114711	6.62141e-10	4.62365e+06	72/141/73	17.7598
Ratio	Duroc	PC aa C36:5 / SM C22:3	2	ALGA0011764	9687593	A	G	0.498	-0.0647979	0.011298	2.5038e-08	1.11658e+06	72/141/73	9.19577
Ratio	Duroc	PC ae C38:3 / PC ae C40:4	2	ALGA0011764	9687593	A	G	0.498	-0.0637364	0.00936425	6.00914e-11	446332	72/141/73	12.3902
Ratio	Duroc	PC ae C34:3 / PC ae C36:5	2	ALGA0011764	9687593	A	G	0.498	-0.0936741	0.0174058	1.55308e-07	336355	72/141/73	12.5124
Ratio	Duroc	lysoPC a C20:3 / PC aa C40:4	2	ALGA0011764	9687593	A	G	0.498	-0.325692	0.0512108	8.1203e-10	241734	72/141/73	13.94
Ratio	Duroc	PC aa C38:3 / PC aa C40:4	2	M1GA0002584	9787054	A	G	0.496	-0.125439	0.0164366	3.59321e-13	7.73393e+07	71/141/73	10.1861
Ratio	Duroc	PC ae C36:5 / PC ae C38:6	2	M1GA0002584	9787054	A	G	0.496	0.0969542	0.0153968	1.15937e-09	6.21621e+07	71/141/73	13.0705
Ratio	Duroc	PC aa C36:3 / PC aa C36:4	2	M1GA0002584	9787054	A	G	0.496	-0.0589406	0.00900388	2.78122e-10	9.12781e+06	71/141/73	11.3987
Ratio	Duroc	PC aa C36:4 / PC aa C36:5	2	M1GA0002584	9787054	A	G	0.496	1.7466	0.288444	4.46409e-09	5.38642e+06	71/141/73	12.2139
Ratio	Duroc	PC aa C36:3 / SM C22:3	2	M1GA0002584	9787054	A	G	0.496	-0.0729768	0.0115027	8.86886e-10	2.86242e+06	71/141/73	16.9684
Ratio	Duroc	PC aa C36:5 / SM C22:3	2	M1GA0002584	9787054	A	G	0.496	-0.0643539	0.0113193	3.25868e-08	737888	71/141/73	8.79588
Ratio	Duroc	PC ae C38:3 / PC ae C40:4	2	M1GA0002584	9787054	A	G	0.496	-0.0635867	0.00938468	7.21771e-11	336318	71/141/73	12.2599
Ratio	Duroc	PC ae C34:3 / PC ae C36:5	2	M1GA0002584	9787054	A	G	0.496	-0.0915594	0.0174642	3.10797e-07	166744	71/141/73	12.3752
Ratio	Duroc	lysoPC a C20:3 / PC aa C40:4	2	M1GA0002584	9787054	A	G	0.496	-0.324125	0.0513625	1.0742e-09	140520	71/141/73	13.8735
Ratio	Duroc	PC aa C36:4 / PC aa C36:5	2	ASGA0009099	10687826	A	C	0.467	1.53856	0.296271	3.96789e-07	205059	58/151/77	8.6107
Ratio	Duroc	PC aa C36:5 / SM C22:3	2	ASGA0009099	10687826	A	C	0.467	-0.0604296	0.0116411	4.00748e-07	175613	58/151/77	8.61683
Ratio	Large White	SM C16:0 / SM C18:1	2	MARC0032515	39825972	G	A	0.119	0.0748029	0.0114238	1.05496e-10	263377	12/164/611	5.16657
Ratio	Large White	PC ae C34:1 / PC ae C36:2	2	MARC0112888	43266253	A	C	0.364	0.0385648	0.00757797	4.50889e-07	280279	103/356/313	3.24585
Ratio	Large White	PC aa C34:1 / PC ae C34:1	2	H3GA0006721	43848793	A	C	0.402	-0.0840156	0.0138926	2.27679e-09	6.23247e+06	118/397/272	4.44069
Ratio	Large White	PC aa C36:6 / PC ae C34:1	2	MARC0032926	43949286	A	G	0.464	-0.18807	0.030711	1.44442e-09	4.02984e+06	173/385/229	3.95715
Ratio	Large White	PC aa C36:6 / PC ae C32:1	2	MARC0032926	43949286	A	G	0.464	-0.0375693	0.00630576	3.85863e-09	1.50851e+06	173/385/229	4.31576
Ratio	Large White	PC aa C36:6 / PC ae C30:0	2	MARC0032926	43949286	A	G	0.464	-0.0522792	0.00918086	1.75146e-08	332339	173/385/229	4.5484
Ratio	Large White	PC aa C32:0 / PC ae C34:1	2	MARC0077792	44147014	G	A	0.418	0.0389502	0.00753425	2.97862e-07	313401	121/416/250	3.28443
Ratio	Large White	PC aa C32:0 / PC ae C34:1	2	ALGA0013592	44471618	G	A	0.416	0.0414451	0.00747061	3.96016e-08	1.43473e+06	121/412/254	3.76356
Ratio	Large White	PC aa C32:0 / PC ae C34:1	2	ALGA0115399	44552554	A	G	0.413	0.0414305	0.00750833	4.66418e-08	1.16163e+06	118/414/255	3.72472
Ratio	Large White	PC aa C32:0 / PC ae C34:1	2	ALGA0013597	44611096	A	G	0.409	-0.0470973	0.00779859	2.39142e-09	1.74759e+06	119/406/262	4.23821
Ratio	Large White	PC aa C36:3 / PC ae C34:1	2	ALGA0013597	44611096	A	G	0.409	-0.0844206	0.0140973	3.22716e-09	1.29501e+06	119/406/262	3.96952
Ratio	Large White	PC aa C34:1 / PC ae C34:1	2	ALGA0013597	44611096	A	G	0.409	-0.0826325	0.0140013	5.35271e-09	780765	119/406/262	4.42906
Ratio	Large White	PC ae C34:1 / PC ae C38:3	2	ALGA0013597	44611096	A	G	0.409	0.0347943	0.00610037	1.66246e-08	251386	119/406/262	4.35809
Ratio	Large White	PC aa C32:0 / PC ae C34:1	2	ALGA0013598	44638259	G	A	0.413	0.0414305	0.00750833	4.66418e-08	1.16163e+06	118/414/255	3.72472
Ratio	Large White	PC aa C32:0 / PC ae C34:1	2	ALGA0013605	44758950	A	G	0.341	0.0448259	0.0074032	2.1786e-09	1.4585e+07	87/363/337	4.12137
Ratio	Large White	PC aa C32:1 / PC ae C34:1	2	ALGA0013605	44758950	A	G	0.341	0.0363534	0.00625025	8.76322e-09	3.10172e+06	87/363/337	3.60283
Ratio	Large White	PC aa C34:1 / PC ae C34:1	2	ALGA0013605	44758950	A	G	0.341	0.0713587	0.0131574	7.79402e-08	510956	87/363/337	3.51294
Ratio	Large White	PC aa C36:3 / PC ae C34:1	2	ALGA0013605	44758950	A	G	0.341	0.0734895	0.0134993	6.97694e-08	230018	87/363/337	3.10745
Ratio	Large White	PC ae C34:1 / PC ae C38:3	2	ALGA0013605	44758950	A	G	0.341	-0.0285677	0.00568631	6.27482e-07	164039	87/363/337	3.62912
Ratio	Large White	PC aa C34:2 / PC ae C34:1	2	ALGA0013605	44758950	A	G	0.341	0.110867	0.0207116	1.13805e-07	152104	87/363/337	4.45113
Ratio	Large White	PC aa C36:6 / PC ae C34:1	2	MARC0019295	44841331	A	G	0.355	-0.213847	0.0337522	3.98097e-10	6.16044e+06	91/376/320	4.69503
Ratio	Large White	PC aa C32:0 / PC ae C34:1	2	MARC0019295	44841331	A	G	0.355	-0.0497525	0.00796428	6.86435e-10	3.57274e+06	91/376/320	4.29417
Ratio	Large White	PC aa C34:1 / PC ae C34:1	2	MARC0019295	44841331	A	G	0.355	-0.0883481	0.0141889	7.77107e-10	3.15588e+06	91/376/320	4.85312
Ratio	Large White	PC aa C36:6 / PC ae C32:1	2	MARC0019295	44841331	A	G	0.355	-0.0414244	0.00697105	4.22667e-09	1.23143e+06	91/376/320	3.98687
Ratio	Large White	PC aa C36:3 / PC ae C34:1	2	MARC0019295	44841331	A	G	0.355	-0.0824882	0.0143888	1.40996e-08	173938	91/376/320	4.72436
Ratio	Large White	PC ae C34:1 / PC ae C38:3	2	MARC0019295	44841331	A	G	0.355	0.0352621	0.00616836	1.54518e-08	158716	91/376/320	4.00859
Ratio	Large White	PC aa C32:0 / PC ae C34:1	2	ALGA0013618	45003832	A	G	0.471	0.0405767	0.00749356	8.16344e-08	1.15428e+06	162/417/207	3.20489
Ratio	Large White	PC aa C32:1 / PC ae C34:1	2	ALGA0013618	45003832	A	G	0.471	0.0321114	0.00629459	4.23305e-07	222603	162/417/207	3.59624
Ratio	Large White	PC aa C32:0 / PC ae C34:1	2	ALGA0013636	45073098	G	C	0.467	0.0414228	0.00746226	3.89059e-08	1.43209e+06	159/417/211	3.76777
Ratio	Large White	PC ae C34:1 / PC ae C38:3	2	DRGA0002989	45084175	A	G	0.463	-0.0334735	0.00554021	2.35327e-09	1.62487e+07	162/405/220	3.35306
Ratio	Large White	PC ae C34:1 / PC ae C36:2	2	DRGA0002989	45084175	A	G	0.463	-0.0397169	0.00727049	6.30147e-08	606801	162/405/220	3.59329
Ratio	Large White	PC ae C34:1 / PC ae C38:2	2	DRGA0002989	45084175	A	G	0.463	-0.0153773	0.00283923	8.11352e-08	471280	162/405/220	4.43287
Ratio	Large White	PC aa C32:0 / PC ae C34:1	2	DRGA0002989	45084175	A	G	0.463	0.0394217	0.0073321	1.00266e-07	381359	162/405/220	3.6533
Ratio	Large White	PC aa C34:1 / PC ae C34:1	2	DRGA0002989	45084175	A	G	0.463	0.0685462	0.0131181	2.23114e-07	171380	162/405/220	3.54302
Ratio	Large White	PC aa C32:0 / PC ae C34:1	2	ASGA0010336	45165481	A	G	0.485	-0.0435459	0.00746	7.77039e-09	1.99361e+06	180/399/203	3.55704
Ratio	Large White	PC aa C34:1 / PC ae C34:1	2	ASGA0010336	45165481	A	G	0.485	-0.0770413	0.0132689	9.28726e-09	1.668e+06	180/399/203	4.03433
Ratio	Large White	PC aa C36:5 / PC ae C34:1	2	ASGA0010336	45165481	A	G	0.485	-0.0586589	0.0102306	1.40328e-08	1.10393e+06	180/399/203	4.08776
Ratio	Large White	PC aa C36:6 / PC ae C34:1	2	ASGA0010336	45165481	A	G	0.485	-0.183996	0.0318713	1.12165e-08	962751	180/399/203	4.13277
Ratio	Large White	PC aa C34:4 / PC ae C34:1	2	ASGA0010336	45165481	A	G	0.485	-0.0200368	0.0035377	2.07932e-08	745010	180/399/203	3.92868
Ratio	Large White	PC ae C34:1 / PC ae C38:3	2	ASGA0010336	45165481	A	G	0.485	0.0325642	0.00575852	2.18492e-08	709003	180/399/203	4.1753
Ratio	Large White	PC aa C32:1 / PC ae C34:1	2	ASGA0010336	45165481	A	G	0.485	-0.0336715	0.00626975	1.03607e-07	149519	180/399/203	3.94049
Ratio	Large White	PC aa C32:0 / PC ae C34:1	2	H3GA0006743	45271919	G	A	0.387	-0.0414593	0.00775748	1.1905e-07	348620	105/399/283	3.45673
Ratio	Large White	PC ae C34:1 / PC ae C36:2	2	H3GA0006743	45271919	G	A	0.387	0.0401144	0.00751708	1.24225e-07	334098	105/399/283	3.49214
Ratio	Large White	PC aa C34:1 / PC ae C34:1	2	H3GA0006743	45271919	G	A	0.387	-0.072888	0.0137308	1.44198e-07	287821	105/399/283	3.50224
Ratio	Large White	PC aa C36:3 / PC ae C34:1	2	H3GA0006743	45271919	G	A	0.387	-0.0721125	0.0139175	2.80385e-07	148023	105/399/283	3.29879
Ratio	Large White	PC aa C32:0 / PC ae C34:1	2	ALGA0013646	45437017	A	G	0.447	0.0469357	0.00746257	5.29279e-10	6.28414e+07	145/413/229	4.19092
Ratio	Large White	PC aa C36:3 / PC ae C34:1	2	ALGA0013646	45437017	A	G	0.447	0.0812886	0.0136152	3.58602e-09	9.27509e+06	145/413/229	4.29409
Ratio	Large White	PC aa C34:1 / PC ae C34:1	2	ALGA0013646	45437017	A	G	0.447	0.0790666	0.0133058	4.22804e-09	7.86668e+06	145/413/229	4.08718
Ratio	Large White	PC aa C32:1 / PC ae C34:1	2	ALGA0013646	45437017	A	G	0.447	0.0364617	0.00621439	6.53499e-09	5.08963e+06	145/413/229	4.78582
Ratio	Large White	PC aa C36:5 / PC ae C34:1	2	ALGA0013646	45437017	A	G	0.447	0.0625004	0.0101661	1.25018e-09	4.84215e+06	145/413/229	4.58257
Ratio	Large White	PC ae C34:1 / PC ae C38:3	2	ALGA0013646	45437017	A	G	0.447	-0.0339619	0.0058645	1.01224e-08	3.28584e+06	145/413/229	4.33311
Ratio	Large White	PC aa C32:0 / PC ae C34:1	2	H3GA0006751	45457827	A	C	0.448	0.0460515	0.00742346	8.93807e-10	1.89303e+07	145/409/227	3.80181
Ratio	Large White	PC ae C34:1 / PC ae C38:3	2	H3GA0006751	45457827	A	C	0.448	-0.0341221	0.00580642	6.19291e-09	2.73217e+06	145/409/227	4.07765
Ratio	Large White	PC aa C36:5 / PC ae C34:1	2	H3GA0006751	45457827	A	C	0.448	0.0587656	0.0101989	1.19503e-08	1.41587e+06	145/409/227	3.94952
Ratio	Large White	PC aa C34:1 / PC ae C34:1	2	H3GA0006751	45457827	A	C	0.448	0.0754362	0.0133116	2.04333e-08	828064	145/409/227	4.23458
Ratio	Large White	PC aa C36:3 / PC ae C34:1	2	H3GA0006751	45457827	A	C	0.448	0.0771384	0.0136175	2.06948e-08	817598	145/409/227	3.6092
Ratio	Large White	PC aa C32:1 / PC ae C34:1	2	H3GA0006751	45457827	A	C	0.448	0.0346781	0.00624192	3.79101e-08	446321	145/409/227	4.69608
Ratio	Large White	PC aa C32:2 / PC ae C34:1	2	H3GA0006751	45457827	A	C	0.448	0.0172239	0.00318505	8.48449e-08	199423	145/409/227	3.94647
Ratio	Large White	PC aa C32:0 / PC ae C34:1	2	ALGA0013650	45495353	A	G	0.367	0.0493532	0.00713841	9.79881e-12	2.45373e+07	103/371/313	4.56273
Ratio	Large White	PC aa C36:5 / PC ae C34:1	2	ALGA0013650	45495353	A	G	0.367	0.0629448	0.00983668	2.691e-10	893484	103/371/313	4.94561
Ratio	Large White	PC aa C32:1 / PC ae C34:1	2	ALGA0013650	45495353	A	G	0.367	0.0371517	0.00605674	1.35955e-09	176850	103/371/313	5.72592
Ratio	Large White	PC aa C32:0 / PC ae C34:1	2	MARC0027345	45628435	G	A	0.279	0.0623035	0.00748417	3.75361e-16	341917696254	58/323/406	5.03029
Ratio	Large White	PC aa C34:1 / PC ae C34:1	2	MARC0027345	45628435	G	A	0.279	0.109031	0.0134599	2.09733e-15	6.11932e+10	58/323/406	4.2116
Ratio	Large White	PC aa C32:1 / PC ae C34:1	2	MARC0027345	45628435	G	A	0.279	0.0496143	0.00643339	3.76443e-14	3.40935e+09	58/323/406	7.02619
Ratio	Large White	PC aa C36:5 / PC ae C34:1	2	MARC0027345	45628435	G	A	0.279	0.0760195	0.0104694	9.27115e-13	1.38432e+08	58/323/406	5.01481
Ratio	Large White	PC aa C30:0 / PC ae C34:1	2	MARC0027345	45628435	G	A	0.279	0.12931	0.0179123	1.23976e-12	1.03522e+08	58/323/406	6.21076
Ratio	Large White	PC aa C34:2 / PC ae C34:1	2	MARC0027345	45628435	G	A	0.279	0.154153	0.0214467	1.53843e-12	8.34242e+07	58/323/406	6.27876
Ratio	Large White	PC aa C34:3 / PC ae C34:1	2	MARC0027345	45628435	G	A	0.279	0.066279	0.00928564	2.1657e-12	5.92614e+07	58/323/406	7.69585
Ratio	Large White	PC aa C36:3 / PC ae C34:1	2	MARC0027345	45628435	G	A	0.279	0.099378	0.0140154	2.98556e-12	4.29877e+07	58/323/406	5.58804
Ratio	Large White	PC ae C34:1 / PC ae C38:3	2	MARC0027345	45628435	G	A	0.279	-0.0406349	0.00590584	1.22197e-11	1.05029e+07	58/323/406	4.26589
Ratio	Large White	PC aa C36:3 / PC ae C36:3	2	MARC0027345	45628435	G	A	0.279	0.126936	0.0196604	1.87984e-10	5.72693e+06	58/323/406	4.92718
Ratio	Large White	PC aa C36:5 / PC ae C38:5	2	MARC0027345	45628435	G	A	0.279	0.0612095	0.0089684	1.76175e-11	2.67207e+06	58/323/406	4.82618
Ratio	Large White	PC aa C34:3 / PC ae C36:3	2	MARC0027345	45628435	G	A	0.279	0.0696103	0.011117	6.27589e-10	1.71541e+06	58/323/406	5.02964
Ratio	Large White	PC ae C38:5 / PC ae C42:5	2	MARC0027345	45628435	G	A	0.279	-0.0488051	0.00723475	2.95558e-11	1.59276e+06	58/323/406	5.67404
Ratio	Large White	PC aa C34:2 / PC ae C36:3	2	MARC0027345	45628435	G	A	0.279	0.221525	0.0360271	1.24328e-09	865911	58/323/406	4.4716
Ratio	Large White	PC aa C32:2 / PC ae C34:1	2	MARC0027345	45628435	G	A	0.279	0.0213878	0.00331287	1.88507e-10	680838	58/323/406	4.74555
Ratio	Large White	PC aa C36:2 / PC ae C34:1	2	MARC0027345	45628435	G	A	0.279	0.0744576	0.0115511	2.0073e-10	639380	58/323/406	6.16022
Ratio	Large White	PC aa C36:5 / PC ae C36:3	2	MARC0027345	45628435	G	A	0.279	0.0814122	0.0134133	1.99809e-09	538801	58/323/406	8.09303
Ratio	Large White	PC ae C34:1 / PC ae C36:2	2	MARC0027345	45628435	G	A	0.279	-0.0496429	0.00777319	2.90941e-10	441130	58/323/406	4.89254
Ratio	Large White	PC aa C36:4 / PC ae C34:1	2	MARC0027345	45628435	G	A	0.279	0.790778	0.124282	3.369e-10	380951	58/323/406	3.9669
Ratio	Large White	PC ae C34:1 / PC ae C40:2	2	MARC0027345	45628435	G	A	0.279	-0.0712077	0.0112719	4.46176e-10	287650	58/323/406	6.08011
Ratio	Large White	PC aa C34:1 / PC ae C36:3	2	MARC0027345	45628435	G	A	0.279	0.0579041	0.009778	4.76251e-09	226051	58/323/406	5.46632
Ratio	Large White	PC aa C36:5 / PC ae C36:4	2	MARC0027345	45628435	G	A	0.279	0.0586156	0.0102804	1.6809e-08	192910	58/323/406	4.58388
Ratio	Large White	PC aa C32:0 / PC ae C36:3	2	MARC0027345	45628435	G	A	0.279	0.0548364	0.00932212	5.98876e-09	179766	58/323/406	6.00486
Ratio	Large White	PC ae C34:1 / SM (OH) C16:1	2	ALGA0013658	45763592	A	C	0.406	-0.0698584	0.0116229	2.83485e-09	1.94692e+06	124/390/271	4.39948
Ratio	Large White	PC aa C32:0 / PC ae C34:1	2	H3GA0006754	45943026	A	G	0.376	0.0455048	0.00735936	1.01037e-09	1.92901e+07	101/390/296	3.72916
Ratio	Large White	PC aa C36:5 / PC ae C34:1	2	H3GA0006754	45943026	A	G	0.376	0.0557894	0.0101043	4.57782e-08	425750	101/390/296	4.63295
Ratio	Large White	PC aa C32:0 / PC ae C34:1	2	ASGA0097854	45965839	A	G	0.285	0.0514953	0.00752572	1.56951e-11	7.5821e+08	63/322/402	3.76646
Ratio	Large White	PC aa C34:1 / PC ae C34:1	2	ASGA0097854	45965839	A	G	0.285	0.084967	0.013493	5.05115e-10	2.35594e+07	63/322/402	4.61118
Ratio	Large White	PC aa C32:1 / PC ae C34:1	2	ASGA0097854	45965839	A	G	0.285	0.0398124	0.00645466	1.10779e-09	1.07423e+07	63/322/402	3.94425
Ratio	Large White	PC aa C34:2 / PC ae C34:1	2	ASGA0097854	45965839	A	G	0.285	0.123713	0.021296	9.12674e-09	1.30388e+06	63/322/402	4.0042
Ratio	Large White	PC aa C36:5 / PC ae C34:1	2	ASGA0097854	45965839	A	G	0.285	0.0599161	0.0104574	1.43629e-08	828538	63/322/402	4.79686
Ratio	Large White	PC aa C30:0 / PC ae C34:1	2	ASGA0097854	45965839	A	G	0.285	0.101561	0.0178657	1.84937e-08	643473	63/322/402	3.65978
Ratio	Large White	PC aa C34:3 / PC ae C34:1	2	ASGA0097854	45965839	A	G	0.285	0.0518733	0.00923817	2.72871e-08	436110	63/322/402	4.11173
Ratio	Large White	PC aa C34:2 / PC ae C36:3	2	ASGA0097854	45965839	A	G	0.285	0.1983	0.0356033	3.50865e-08	259771	63/322/402	3.85195
Ratio	Large White	PC aa C32:0 / PC ae C36:3	2	ASGA0097854	45965839	A	G	0.285	0.0512468	0.00923371	3.91205e-08	232985	63/322/402	5.61521
Ratio	Large White	PC aa C34:3 / PC ae C36:3	2	ASGA0097854	45965839	A	G	0.285	0.0601575	0.0110022	6.1318e-08	148643	63/322/402	3.79229
Ratio	Large White	PC aa C32:1 / PC ae C34:1	2	MARC0050252	46153779	A	G	0.139	0.0459917	0.00909363	5.29267e-07	186873	12/195/580	3.14789
Ratio	Large White	PC aa C32:1 / PC ae C34:1	2	ALGA0112722	46155421	G	A	0.139	0.0459917	0.00909363	5.29267e-07	186873	12/195/580	3.14789
Ratio	Large White	PC aa C32:1 / PC ae C34:1	2	ASGA0094111	46178279	A	G	0.139	0.0459917	0.00909363	5.29267e-07	186873	12/195/580	3.14789
Ratio	Large White	PC aa C36:3 / PC ae C34:1	2	MARC0104903	46311140	A	G	0.369	-0.0923006	0.0138365	4.80785e-11	2.33477e+08	102/377/308	3.87908
Ratio	Large White	PC ae C34:1 / PC ae C36:2	2	MARC0104903	46311140	A	G	0.369	0.0490503	0.00741991	7.07756e-11	1.58603e+08	102/377/308	4.93061
Ratio	Large White	PC ae C34:1 / PC ae C38:3	2	MARC0104903	46311140	A	G	0.369	0.0387248	0.00589819	9.43604e-11	1.18961e+08	102/377/308	4.06951
Ratio	Large White	PC aa C34:3 / PC ae C34:1	2	MARC0104903	46311140	A	G	0.369	-0.0603949	0.00921465	1.01402e-10	1.107e+08	102/377/308	3.91513
Ratio	Large White	PC ae C34:1 / PC ae C38:2	2	MARC0104903	46311140	A	G	0.369	0.0196459	0.00300211	1.08178e-10	1.03766e+08	102/377/308	4.76326
Ratio	Large White	PC aa C36:2 / PC ae C34:1	2	MARC0104903	46311140	A	G	0.369	-0.0751998	0.0117706	2.86749e-10	3.91465e+07	102/377/308	5.16065
Ratio	Large White	PC aa C32:0 / PC ae C34:1	2	MARC0104903	46311140	A	G	0.369	-0.0486369	0.00768322	4.11866e-10	2.72545e+07	102/377/308	4.95535
Ratio	Large White	PC aa C34:1 / PC ae C34:1	2	MARC0104903	46311140	A	G	0.369	-0.0861171	0.0137263	5.82272e-10	1.92783e+07	102/377/308	5.19287
Ratio	Large White	PC aa C36:6 / PC ae C34:1	2	MARC0104903	46311140	A	G	0.369	-0.208383	0.0325314	2.58225e-10	6.43454e+06	102/377/308	4.02075
Ratio	Large White	PC aa C34:4 / PC ae C34:1	2	MARC0104903	46311140	A	G	0.369	-0.0219495	0.00366826	3.31901e-09	3.38209e+06	102/377/308	5.26067
Ratio	Large White	PC aa C36:5 / PC ae C34:1	2	MARC0104903	46311140	A	G	0.369	-0.0613059	0.0106102	1.09055e-08	1.02932e+06	102/377/308	3.5829
Ratio	Large White	PC aa C36:3 / PC ae C36:3	2	MARC0104903	46311140	A	G	0.369	-0.110807	0.0196618	2.43389e-08	991998	102/377/308	5.1759
Ratio	Large White	PC aa C36:4 / PC ae C34:1	2	MARC0104903	46311140	A	G	0.369	-0.727183	0.126572	1.31432e-08	854072	102/377/308	3.66122
Ratio	Large White	PC ae C34:1 / PC ae C36:1	2	MARC0104903	46311140	A	G	0.369	0.0505834	0.00880959	1.33951e-08	838008	102/377/308	3.82205
Ratio	Large White	PC aa C36:2 / PC ae C36:3	2	MARC0104903	46311140	A	G	0.369	-0.0157613	0.0029145	8.47649e-08	615226	102/377/308	3.33076
Ratio	Large White	PC ae C38:4 / PC ae C38:5	2	MARC0104903	46311140	A	G	0.369	-0.0314396	0.0059437	1.59243e-07	591808	102/377/308	5.35177
Ratio	Large White	PC ae C34:1 / PC ae C38:4	2	MARC0104903	46311140	A	G	0.369	0.0474579	0.00838061	2.09089e-08	536861	102/377/308	4.02526
Ratio	Large White	PC aa C34:2 / PC ae C34:1	2	MARC0104903	46311140	A	G	0.369	-0.121074	0.0216498	3.09516e-08	362669	102/377/308	3.67991
Ratio	Large White	PC aa C34:3 / PC ae C36:3	2	MARC0104903	46311140	A	G	0.369	-0.0609024	0.0111362	6.09477e-08	257865	102/377/308	3.43316
Ratio	Large White	PC ae C36:3 / PC ae C38:2	2	MARC0104903	46311140	A	G	0.369	0.0417178	0.00801137	2.45073e-07	219715	102/377/308	4.35144
Ratio	Large White	PC aa C32:2 / PC ae C34:1	2	MARC0104903	46311140	A	G	0.369	-0.0179637	0.00327603	5.63312e-08	199271	102/377/308	4.84508
Ratio	Large White	PC aa C32:0 / PC ae C34:1	2	ASGA0084756	46369487	C	A	0.402	0.0435476	0.00721845	2.48365e-09	2.32326e+07	115/402/270	4.12545
Ratio	Large White	PC aa C32:1 / PC ae C34:1	2	ASGA0084756	46369487	C	A	0.402	0.0356134	0.00611987	8.61358e-09	5.45612e+06	115/402/270	4.03484
Ratio	Large White	PC ae C34:1 / PC ae C38:3	2	ASGA0084756	46369487	C	A	0.402	-0.0311899	0.00560981	3.7043e-08	2.49912e+06	115/402/270	3.77941
Ratio	Large White	PC aa C36:3 / PC ae C34:1	2	ASGA0084756	46369487	C	A	0.402	0.0732803	0.0132727	4.5832e-08	653528	115/402/270	3.51306
Ratio	Large White	PC aa C36:5 / PC ae C34:1	2	ASGA0084756	46369487	C	A	0.402	0.0571156	0.00992913	1.26226e-08	406226	115/402/270	3.21618
Ratio	Large White	PC aa C34:1 / PC ae C34:1	2	ASGA0084756	46369487	C	A	0.402	0.0662944	0.0129634	3.97002e-07	233185	115/402/270	3.67551
Ratio	Large White	PC aa C34:3 / PC ae C34:1	2	ASGA0084756	46369487	C	A	0.402	0.0471056	0.00879989	1.13748e-07	205286	115/402/270	4.4201
Ratio	Large White	PC aa C34:4 / PC ae C34:1	2	ASGA0084756	46369487	C	A	0.402	0.0189265	0.00345376	5.73867e-08	204245	115/402/270	3.45653
Ratio	Large White	PC aa C32:2 / PC ae C34:1	2	ASGA0084756	46369487	C	A	0.402	0.0164307	0.00309536	1.44316e-07	166582	115/402/270	3.72888
Ratio	Large White	PC ae C34:1 / PC ae C38:3	2	ASGA0097814	46605610	A	G	0.433	-0.0385378	0.00560395	1.25128e-11	9.15266e+08	139/404/244	3.7798
Ratio	Large White	PC aa C32:0 / PC ae C34:1	2	ASGA0097814	46605610	A	G	0.433	0.0472191	0.00722739	1.15744e-10	9.89472e+07	139/404/244	4.4252
Ratio	Large White	PC aa C36:3 / PC ae C34:1	2	ASGA0097814	46605610	A	G	0.433	0.0851747	0.0132549	2.27503e-10	5.03405e+07	139/404/244	4.39503
Ratio	Large White	PC aa C32:2 / PC ae C34:1	2	ASGA0097814	46605610	A	G	0.433	0.0188757	0.00306502	1.17372e-09	9.7575e+06	139/404/244	4.23283
Ratio	Large White	PC aa C32:1 / PC ae C34:1	2	ASGA0097814	46605610	A	G	0.433	0.0368307	0.00610137	2.43067e-09	4.7117e+06	139/404/244	3.83744
Ratio	Large White	PC aa C36:5 / PC ae C34:1	2	ASGA0097814	46605610	A	G	0.433	0.0600232	0.00997908	2.76096e-09	4.14805e+06	139/404/244	3.32125
Ratio	Large White	PC aa C34:4 / PC ae C34:1	2	ASGA0097814	46605610	A	G	0.433	0.0207395	0.0034524	2.88784e-09	3.9658e+06	139/404/244	5.66847
Ratio	Large White	PC aa C34:3 / PC ae C34:1	2	ASGA0097814	46605610	A	G	0.433	0.0525014	0.00882595	4.07676e-09	2.80924e+06	139/404/244	3.7362
Ratio	Large White	PC aa C34:1 / PC ae C34:1	2	ASGA0097814	46605610	A	G	0.433	0.0763843	0.0129512	5.47578e-09	2.0915e+06	139/404/244	3.65936
Ratio	Large White	PC aa C36:3 / PC ae C36:3	2	ASGA0097814	46605610	A	G	0.433	0.104224	0.0187447	3.69827e-08	997074	139/404/244	4.5975
Ratio	Large White	PC ae C34:1 / PC ae C38:2	2	ASGA0097814	46605610	A	G	0.433	-0.0162024	0.00289117	2.90084e-08	394802	139/404/244	4.30273
Ratio	Large White	PC aa C34:2 / PC ae C34:1	2	ASGA0097814	46605610	A	G	0.433	0.11324	0.0204893	4.44398e-08	257710	139/404/244	5.14471
Ratio	Large White	PC aa C36:4 / PC ae C34:1	2	ASGA0097814	46605610	A	G	0.433	0.655696	0.119927	6.14264e-08	186444	139/404/244	4.98526
Ratio	Large White	PC ae C36:3 / PC ae C38:3	2	ASGA0097814	46605610	A	G	0.433	-0.0459189	0.00883118	2.55087e-07	174614	139/404/244	4.3844
Ratio	Large White	PC ae C34:1 / PC ae C36:2	2	ASGA0010359	46627442	A	G	0.37	0.0503073	0.00741123	2.24628e-11	1.19524e+09	102/379/306	4.88836
Ratio	Large White	PC ae C34:1 / PC ae C38:2	2	ASGA0010359	46627442	A	G	0.37	0.0200114	0.00299343	4.38459e-11	6.11229e+08	102/379/306	3.79119
Ratio	Large White	PC aa C36:3 / PC ae C34:1	2	ASGA0010359	46627442	A	G	0.37	-0.0942394	0.013792	1.67283e-11	5.94762e+08	102/379/306	4.09733
Ratio	Large White	PC ae C34:1 / PC ae C38:3	2	ASGA0010359	46627442	A	G	0.37	0.0390462	0.00588474	6.04812e-11	4.43914e+08	102/379/306	3.51794
Ratio	Large White	PC aa C34:3 / PC ae C34:1	2	ASGA0010359	46627442	A	G	0.37	-0.0607455	0.0091981	7.37757e-11	9.99708e+07	102/379/306	4.57213
Ratio	Large White	PC aa C32:0 / PC ae C34:1	2	ASGA0010359	46627442	A	G	0.37	-0.0489608	0.00766544	2.89541e-10	9.27277e+07	102/379/306	4.03263
Ratio	Large White	PC aa C36:2 / PC ae C34:1	2	ASGA0010359	46627442	A	G	0.37	-0.074681	0.0117424	3.42914e-10	7.8295e+07	102/379/306	5.37347
Ratio	Large White	PC aa C34:1 / PC ae C34:1	2	ASGA0010359	46627442	A	G	0.37	-0.0842752	0.0137243	1.30657e-09	2.05488e+07	102/379/306	5.2977
Ratio	Large White	PC aa C34:2 / PC ae C34:1	2	ASGA0010359	46627442	A	G	0.37	-0.125584	0.0215805	8.61195e-09	3.11758e+06	102/379/306	5.53089
Ratio	Large White	PC ae C34:1 / PC ae C36:1	2	ASGA0010359	46627442	A	G	0.37	0.0506635	0.00881	1.27408e-08	2.10728e+06	102/379/306	4.1255
Ratio	Large White	PC aa C34:4 / PC ae C34:1	2	ASGA0010359	46627442	A	G	0.37	-0.0211144	0.00366972	1.25254e-08	1.92785e+06	102/379/306	3.73363
Ratio	Large White	PC aa C36:6 / PC ae C34:1	2	ASGA0010359	46627442	A	G	0.37	-0.2002	0.0325878	1.28462e-09	1.42031e+06	102/379/306	4.57614
Ratio	Large White	PC aa C36:4 / PC ae C34:1	2	ASGA0010359	46627442	A	G	0.37	-0.719601	0.126461	1.79196e-08	1.38579e+06	102/379/306	3.95172
Ratio	Large White	PC aa C36:3 / PC ae C36:3	2	ASGA0010359	46627442	A	G	0.37	-0.113728	0.0196131	9.69831e-09	1.02589e+06	102/379/306	3.57873
Ratio	Large White	PC ae C38:4 / PC ae C38:5	2	ASGA0010359	46627442	A	G	0.37	-0.0312689	0.00594414	1.85613e-07	671492	102/379/306	4.03667
Ratio	Large White	PC aa C32:2 / PC ae C34:1	2	ASGA0010359	46627442	A	G	0.37	-0.0180836	0.00326703	4.24351e-08	632695	102/379/306	3.74716
Ratio	Large White	PC aa C36:5 / PC ae C34:1	2	ASGA0010359	46627442	A	G	0.37	-0.0591317	0.0106183	3.52503e-08	629475	102/379/306	5.25088
Ratio	Large White	PC aa C36:2 / PC ae C36:3	2	ASGA0010359	46627442	A	G	0.37	-0.0157195	0.00290852	8.62645e-08	313592	102/379/306	3.39676
Ratio	Large White	PC ae C36:3 / PC ae C38:2	2	ASGA0010359	46627442	A	G	0.37	0.0428292	0.00799399	1.10938e-07	241576	102/379/306	3.519
Ratio	Large White	PC ae C34:1 / PC ae C38:4	2	ASGA0010359	46627442	A	G	0.37	0.044937	0.00838873	1.11432e-07	240940	102/379/306	5.60022
Ratio	Large White	PC aa C34:3 / PC ae C36:3	2	ASGA0010359	46627442	A	G	0.37	-0.0614515	0.0111229	4.49251e-08	164171	102/379/306	4.92832
Ratio	Large White	PC aa C36:3 / PC ae C34:1	2	MARC0095075	46800327	G	A	0.43	-0.0930888	0.0134773	1.02435e-11	3.98142e+08	135/407/245	3.35293
Ratio	Large White	PC ae C34:1 / PC ae C38:3	2	MARC0095075	46800327	G	A	0.43	0.0372007	0.00578884	2.26999e-10	2.38084e+08	135/407/245	3.99179
Ratio	Large White	PC ae C34:1 / PC ae C36:2	2	MARC0095075	46800327	G	A	0.43	0.0461689	0.00743352	8.54624e-10	7.01455e+07	135/407/245	4.22536
Ratio	Large White	PC ae C34:1 / PC ae C38:2	2	MARC0095075	46800327	G	A	0.43	0.0181891	0.00294585	1.06535e-09	2.90246e+07	135/407/245	3.24181
Ratio	Large White	PC aa C32:0 / PC ae C34:1	2	MARC0095075	46800327	G	A	0.43	-0.0453127	0.00749002	2.24676e-09	2.66819e+07	135/407/245	4.98578
Ratio	Large White	PC aa C34:1 / PC ae C34:1	2	MARC0095075	46800327	G	A	0.43	-0.0790999	0.013424	5.65109e-09	1.00966e+07	135/407/245	4.42355
Ratio	Large White	PC aa C34:2 / PC ae C34:1	2	MARC0095075	46800327	G	A	0.43	-0.126838	0.0210161	2.44776e-09	7.4765e+06	135/407/245	4.67254
Ratio	Large White	PC aa C34:3 / PC ae C34:1	2	MARC0095075	46800327	G	A	0.43	-0.0556021	0.00905082	1.28519e-09	6.74788e+06	135/407/245	4.62042
Ratio	Large White	PC aa C36:2 / PC ae C34:1	2	MARC0095075	46800327	G	A	0.43	-0.0658351	0.0115091	1.51346e-08	1.73985e+06	135/407/245	3.48604
Ratio	Large White	PC aa C32:2 / PC ae C34:1	2	MARC0095075	46800327	G	A	0.43	-0.0176829	0.00318589	3.90343e-08	634155	135/407/245	4.57603
Ratio	Large White	PC aa C32:1 / PC ae C34:1	2	MARC0095075	46800327	G	A	0.43	-0.0330588	0.00632676	2.23231e-07	268547	135/407/245	4.44383
Ratio	Large White	PC aa C36:4 / PC ae C34:1	2	MARC0095075	46800327	G	A	0.43	-0.662189	0.124201	1.27456e-07	179788	135/407/245	3.76699
Ratio	Large White	PC ae C34:1 / PC ae C36:1	2	MARC0095075	46800327	G	A	0.43	0.0450737	0.0087778	3.56403e-07	168203	135/407/245	5.71549
Ratio	Large White	PC aa C34:1 / PC ae C34:1	2	ALGA0119911	46842659	C	A	0.464	-0.0842114	0.0131309	2.4623e-10	1.29387e+07	155/418/212	4.54061
Ratio	Large White	PC aa C36:2 / PC ae C34:1	2	ALGA0119911	46842659	C	A	0.464	-0.0683363	0.0111833	1.56385e-09	2.03721e+06	155/418/212	4.9786
Ratio	Large White	PC aa C36:3 / PC ae C34:1	2	ALGA0119911	46842659	C	A	0.464	-0.0804259	0.0133865	2.87571e-09	1.10787e+06	155/418/212	4.28685
Ratio	Large White	PC ae C34:1 / PC ae C38:2	2	ALGA0119911	46842659	C	A	0.464	0.0171632	0.00289455	4.55558e-09	699341	155/418/212	4.10006
Ratio	Large White	PC ae C34:1 / PC ae C36:2	2	ALGA0119911	46842659	C	A	0.464	0.0435082	0.00739474	5.94487e-09	535908	155/418/212	4.22363
Ratio	Large White	PC ae C34:1 / PC ae C38:3	2	ALGA0119911	46842659	C	A	0.464	0.0330081	0.0056977	9.99989e-09	318594	155/418/212	4.39607
Ratio	Large White	PC aa C34:1 / PC ae C34:1	2	MARC0041991	46844298	G	A	0.463	-0.0830671	0.0130916	3.75959e-10	7.39721e+06	156/417/214	4.46267
Ratio	Large White	PC aa C36:2 / PC ae C34:1	2	MARC0041991	46844298	G	A	0.463	-0.0676943	0.0111649	2.07494e-09	1.3403e+06	156/417/214	4.86663
Ratio	Large White	PC aa C36:3 / PC ae C34:1	2	MARC0041991	46844298	G	A	0.463	-0.0805832	0.0133306	2.31122e-09	1.20328e+06	156/417/214	4.42126
Ratio	Large White	PC ae C34:1 / PC ae C38:2	2	MARC0041991	46844298	G	A	0.463	0.0174043	0.00288454	2.47152e-09	1.12524e+06	156/417/214	4.20935
Ratio	Large White	PC ae C34:1 / PC ae C36:2	2	MARC0041991	46844298	G	A	0.463	0.0438822	0.00736005	3.7631e-09	739032	156/417/214	4.32169
Ratio	Large White	PC ae C34:1 / PC ae C38:3	2	MARC0041991	46844298	G	A	0.463	0.033411	0.0056814	6.04607e-09	459976	156/417/214	4.43713
Ratio	Large White	PC aa C32:0 / PC ae C34:1	2	ASGA0095968	46993599	A	G	0.409	-0.0488574	0.00752792	1.52062e-10	7.88392e+07	122/400/265	3.95291
Ratio	Large White	PC aa C36:3 / PC ae C34:1	2	ASGA0095968	46993599	A	G	0.409	-0.0837975	0.0136902	1.46948e-09	8.15826e+06	122/400/265	3.63079
Ratio	Large White	PC ae C34:1 / PC ae C38:3	2	ASGA0095968	46993599	A	G	0.409	0.0355912	0.00583015	1.62007e-09	7.39995e+06	122/400/265	4.40769
Ratio	Large White	PC aa C34:3 / PC ae C34:1	2	ASGA0095968	46993599	A	G	0.409	-0.0555546	0.00915071	1.97956e-09	6.05611e+06	122/400/265	4.29211
Ratio	Large White	PC aa C34:1 / PC ae C34:1	2	ASGA0095968	46993599	A	G	0.409	-0.081296	0.0134955	2.61727e-09	4.58051e+06	122/400/265	4.52124
Ratio	Large White	PC ae C34:1 / PC ae C38:2	2	ASGA0095968	46993599	A	G	0.409	0.0176601	0.00297266	4.26364e-09	2.81179e+06	122/400/265	4.01607
Ratio	Large White	PC aa C34:2 / PC ae C34:1	2	ASGA0095968	46993599	A	G	0.409	-0.124306	0.0212409	7.12957e-09	1.68151e+06	122/400/265	4.17027
Ratio	Large White	PC aa C32:2 / PC ae C34:1	2	ASGA0095968	46993599	A	G	0.409	-0.0187191	0.0032134	8.32091e-09	1.44076e+06	122/400/265	4.47381
Ratio	Large White	PC ae C34:1 / PC ae C36:2	2	ASGA0095968	46993599	A	G	0.409	0.0432914	0.00754419	1.36623e-08	877481	122/400/265	4.13364
Ratio	Large White	PC aa C32:1 / PC ae C34:1	2	ASGA0095968	46993599	A	G	0.409	-0.0359574	0.00631807	1.78306e-08	672353	122/400/265	5.08033
Ratio	Large White	PC aa C36:2 / PC ae C34:1	2	ASGA0095968	46993599	A	G	0.409	-0.0629247	0.0115559	6.92798e-08	173044	122/400/265	4.54433
Ratio	Large White	PC aa C32:0 / PC ae C34:1	2	MARC0048973	47166908	A	G	0.367	-0.0494634	0.00767526	2.02522e-10	4.50084e+07	99/380/308	3.61916
Ratio	Large White	PC ae C34:1 / PC ae C38:3	2	MARC0048973	47166908	A	G	0.367	0.0371043	0.00587326	4.4558e-10	2.04569e+07	99/380/308	3.76305
Ratio	Large White	PC ae C34:1 / PC ae C38:2	2	MARC0048973	47166908	A	G	0.367	0.0186612	0.00299785	7.85171e-10	1.16092e+07	99/380/308	3.73718
Ratio	Large White	PC aa C34:3 / PC ae C34:1	2	MARC0048973	47166908	A	G	0.367	-0.0569683	0.00922526	1.06034e-09	8.59649e+06	99/380/308	4.28774
Ratio	Large White	PC ae C34:1 / PC ae C36:2	2	MARC0048973	47166908	A	G	0.367	0.0460954	0.00751262	1.34514e-09	6.77641e+06	99/380/308	4.69259
Ratio	Large White	PC aa C34:1 / PC ae C34:1	2	MARC0048973	47166908	A	G	0.367	-0.0815444	0.0137334	4.34312e-09	2.09877e+06	99/380/308	4.2647
Ratio	Large White	PC aa C36:6 / PC ae C34:1	2	MARC0048973	47166908	A	G	0.367	-0.196178	0.0331324	4.78651e-09	1.26203e+06	99/380/308	4.82649
Ratio	Large White	PC aa C34:4 / PC ae C34:1	2	MARC0048973	47166908	A	G	0.367	-0.0213206	0.00366508	8.71686e-09	1.0457e+06	99/380/308	4.56525
Ratio	Large White	PC aa C36:3 / PC ae C34:1	2	MARC0048973	47166908	A	G	0.367	-0.080548	0.0139269	1.05639e-08	862865	99/380/308	3.57498
Ratio	Large White	PC aa C34:3 / PC ae C36:3	2	MARC0048973	47166908	A	G	0.367	-0.0634342	0.0110845	1.49216e-08	859077	99/380/308	3.99515
Ratio	Large White	PC ae C36:3 / PC ae C38:2	2	MARC0048973	47166908	A	G	0.367	0.0444976	0.00796232	3.16226e-08	405369	99/380/308	4.62153
Ratio	Large White	PC ae C34:1 / SM (OH) C16:1	2	MARC0048973	47166908	A	G	0.367	0.0695971	0.012546	3.96878e-08	229673	99/380/308	5.01271
Ratio	Large White	PC aa C36:2 / PC ae C34:1	2	MARC0048973	47166908	A	G	0.367	-0.0647496	0.0117141	4.42573e-08	205960	99/380/308	3.81696
Ratio	Large White	PC aa C36:3 / PC ae C36:3	2	MARC0048973	47166908	A	G	0.367	-0.106862	0.0196574	7.27586e-08	176183	99/380/308	4.07706
Ratio	Large White	PC aa C36:2 / PC ae C36:3	2	MARC0048973	47166908	A	G	0.367	-0.0156083	0.00288952	8.76375e-08	146271	99/380/308	4.12263
Ratio	Large White	PC aa C32:0 / PC ae C34:1	2	MARC0003869	47231850	G	A	0.357	-0.0517988	0.00786612	8.33337e-11	7.11784e+07	92/378/317	3.78779
Ratio	Large White	PC aa C34:1 / PC ae C34:1	2	MARC0003869	47231850	G	A	0.357	-0.0832968	0.014163	6.0266e-09	984230	92/378/317	4.21011
Ratio	Large White	PC aa C34:3 / PC ae C34:1	2	MARC0003869	47231850	G	A	0.357	-0.0551281	0.00950061	9.47923e-09	625743	92/378/317	3.75255
Ratio	Large White	PC aa C36:6 / PC ae C34:1	2	MARC0003869	47231850	G	A	0.357	-0.194308	0.0340075	1.57085e-08	377601	92/378/317	3.98296
Ratio	Large White	PC ae C34:1 / PC ae C38:3	2	MARC0003869	47231850	G	A	0.357	0.0348354	0.00612178	1.79112e-08	331166	92/378/317	3.95184
Ratio	Large White	PC aa C36:3 / PC ae C34:1	2	MARC0003869	47231850	G	A	0.357	-0.0804803	0.0143098	2.59489e-08	228586	92/378/317	3.75731
Ratio	Large White	PC ae C34:1 / SM (OH) C16:1	2	MARC0003869	47231850	G	A	0.357	0.0723783	0.013003	3.5758e-08	165881	92/378/317	4.10275
Ratio	Large White	PC aa C34:4 / PC ae C34:1	2	MARC0003869	47231850	G	A	0.357	-0.0210434	0.00378587	3.73464e-08	158825	92/378/317	5.22217
Ratio	Large White	PC ae C34:1 / PC ae C36:2	2	MARC0003869	47231850	G	A	0.357	0.0429624	0.00775081	4.06592e-08	145885	92/378/317	3.86389
Ratio	Large White	PC ae C34:1 / PC ae C38:2	2	MARC0003869	47231850	G	A	0.357	0.0172464	0.00311345	4.14832e-08	142987	92/378/317	3.77748
Ratio	Large White	PC aa C32:0 / PC ae C34:1	2	ALGA0013687	47326959	A	G	0.381	0.0426226	0.00709784	2.92672e-09	3.69412e+06	103/393/291	3.96502
Ratio	Large White	PC aa C34:1 / PC ae C34:1	2	ALGA0013687	47326959	A	G	0.381	0.0728417	0.012587	1.03573e-08	1.04386e+06	103/393/291	4.08174
Ratio	Large White	PC aa C32:1 / PC ae C34:1	2	ALGA0013687	47326959	A	G	0.381	0.0346303	0.0060752	1.69429e-08	638123	103/393/291	4.38123
Ratio	Large White	PC aa C32:0 / PC ae C34:1	2	H3GA0006772	47351187	A	G	0.355	-0.0490905	0.00767114	2.68444e-10	1.55044e+07	94/368/321	3.58085
Ratio	Large White	PC aa C34:1 / PC ae C34:1	2	H3GA0006772	47351187	A	G	0.355	-0.0852119	0.0135972	6.0787e-10	6.84698e+06	94/368/321	4.25175
Ratio	Large White	PC aa C36:3 / PC ae C34:1	2	H3GA0006772	47351187	A	G	0.355	-0.0831744	0.0140067	4.33101e-09	960993	94/368/321	4.77622
Ratio	Large White	PC aa C32:1 / PC ae C34:1	2	H3GA0006772	47351187	A	G	0.355	-0.0376979	0.00639319	5.51688e-09	754425	94/368/321	4.04676
Ratio	Large White	PC aa C34:2 / PC ae C34:1	2	H3GA0006772	47351187	A	G	0.355	-0.123927	0.0215656	1.30457e-08	319038	94/368/321	4.9702
Ratio	Large White	PC aa C36:3 / PC ae C36:3	2	H3GA0006772	47351187	A	G	0.355	-0.10643	0.0197367	9.20567e-08	150359	94/368/321	4.30936
Ratio	Large White	PC aa C32:0 / PC ae C34:1	2	ASGA0010360	47407354	A	G	0.308	-0.0541123	0.00808506	4.16984e-11	4.03294e+07	73/339/375	5.20576
Ratio	Large White	PC aa C34:1 / PC ae C34:1	2	ASGA0010360	47407354	A	G	0.308	-0.0937831	0.0142655	8.93416e-11	1.8823e+07	73/339/375	4.05332
Ratio	Large White	PC aa C36:6 / PC ae C32:1	2	ASGA0010360	47407354	A	G	0.308	-0.041109	0.0071295	1.16761e-08	690943	73/339/375	5.3853
Ratio	Large White	PC aa C34:3 / PC ae C34:1	2	ASGA0010360	47407354	A	G	0.308	-0.0577587	0.00973107	4.39908e-09	382279	73/339/375	4.23426
Ratio	Large White	PC aa C36:6 / PC ae C34:1	2	ASGA0010360	47407354	A	G	0.308	-0.206427	0.0349941	5.44283e-09	308970	73/339/375	4.2847
Single	Large White	SM C18:0	2	DIAS0001332	47455523	A	G	0.349	-0.154161	0.0319655	1.7017e-06	-	89/371/327	2.87054
Ratio	Large White	PC aa C34:1 / PC ae C34:1	2	M1GA0024860	47692123	G	A	0.259	-0.0958419	0.0154046	8.00676e-10	4.08325e+06	56/295/436	4.68796
Ratio	Large White	PC aa C32:0 / PC ae C34:1	2	M1GA0024860	47692123	G	A	0.259	-0.052191	0.00864778	2.44893e-09	1.33502e+06	56/295/436	4.42343
Ratio	Large White	PC aa C34:1 / PC ae C34:1	2	MARC0005311	47780774	G	A	0.257	-0.0992389	0.0154635	2.39605e-10	4.92111e+06	56/292/439	4.97302
Ratio	Large White	PC aa C32:0 / PC ae C34:1	2	MARC0005311	47780774	G	A	0.257	-0.0515182	0.00869815	4.73434e-09	249057	56/292/439	4.2673
Ratio	Large White	PC ae C34:1 / PC ae C36:2	2	ALGA0013696	47968857	G	A	0.464	0.0380247	0.00735669	2.99442e-07	196347	159/412/216	3.28317
Ratio	Large White	PC aa C34:3 / PC ae C34:1	2	ALGA0013696	47968857	G	A	0.464	-0.044805	0.00875146	3.85426e-07	149832	159/412/216	3.22322
Ratio	Large White	PC aa C34:1 / PC ae C34:1	2	ALGA0013695	47997430	G	A	0.306	-0.0854131	0.0145664	6.67217e-09	626159	73/335/379	3.91169
Ratio	Large White	PC aa C32:1 / PC ae C34:1	2	ALGA0013695	47997430	G	A	0.306	-0.0382172	0.00675188	2.12143e-08	196935	73/335/379	4.18599
Ratio	Large White	PC aa C32:1 / PC ae C34:1	2	MARC0079844	48041248	A	G	0.315	-0.0384617	0.00657111	7.09068e-09	925093	80/336/371	4.17157
Ratio	Large White	PC aa C34:1 / PC ae C34:1	2	MARC0079844	48041248	A	G	0.315	-0.0802234	0.0142477	2.50276e-08	262092	80/336/371	3.87246
Ratio	Large White	PC aa C34:1 / PC ae C34:1	2	ALGA0013690	48097311	A	G	0.344	-0.0753061	0.0136126	4.3157e-08	372358	93/356/338	3.74316
Ratio	Large White	PC aa C32:0 / PC ae C34:1	2	ALGA0013702	48557746	A	G	0.451	-0.0381973	0.0070419	7.75935e-08	350382	159/392/236	3.40572
Ratio	Large White	PC ae C34:1 / PC ae C36:1	2	ALGA0013702	48557746	A	G	0.451	0.0426097	0.00808896	1.78744e-07	152102	159/392/236	3.60389
Ratio	Large White	SM C16:1 / SM C18:1	2	MARC0081387	50110622	A	C	0.09	0.0729125	0.0104324	5.92601e-12	1.0247e+08	7/127/653	5.84402
Ratio	Large White	SM C16:1 / SM C18:1	2	ASGA0010510	50750725	A	C	0.089	0.061526	0.0103483	4.14971e-09	6.42914e+06	7/126/654	4.29852
Ratio	Large White	SM C16:0 / SM C18:1	2	ASGA0010510	50750725	A	C	0.089	0.0639098	0.011717	6.5909e-08	404786	7/126/654	3.64264
Ratio	Large White	SM C16:1 / SM C18:1	2	H3GA0006894	55981917	G	A	0.109	0.065504	0.00975891	3.67897e-11	4.44092e+07	9/153/625	5.41479
Ratio	Large White	SM C16:1 / SM C18:1	2	ASGA0010501	58780688	G	A	0.093	0.0754761	0.0103941	9.25152e-13	2.06342e+09	5/136/646	6.27926
Ratio	Large White	SM C16:1 / SM C18:1	2	H3GA0006890	58920429	G	A	0.094	0.0749548	0.0103186	9.08783e-13	1.28406e+09	5/138/644	6.28344
Ratio	Large White	SM C16:1 / SM C18:1	2	H3GA0006888	59024796	A	G	0.072	0.0922429	0.0113605	1.8121e-15	114196803926	4/105/676	4.90412
Ratio	Large White	SM C16:0 / SM C18:1	2	H3GA0006888	59024796	A	G	0.072	0.085317	0.0130367	1.07935e-10	1.91723e+06	4/105/676	5.25775
Ratio	Large White	SM C16:0 / SM C18:0	2	H3GA0006888	59024796	A	G	0.072	0.0714174	0.0108204	7.56119e-11	1.52923e+06	4/105/676	7.74782
Ratio	Large White	SM (OH) C12:2 / SM C18:1	2	H3GA0006888	59024796	A	G	0.072	0.125049	0.0196537	3.37291e-10	613523	4/105/676	5.17365
Ratio	Large White	SM C16:1 / SM C18:1	2	ALGA0013961	59069896	G	A	0.094	0.0749548	0.0103186	9.08783e-13	1.28406e+09	5/138/644	6.28344
Ratio	Large White	SM C16:1 / SM C18:1	2	ALGA0013963	59117451	A	G	0.072	0.0921559	0.0113635	1.95261e-15	101198550247	4/105/678	4.85704
Ratio	Large White	SM C16:0 / SM C18:1	2	ALGA0013963	59117451	A	G	0.072	0.0853182	0.0130388	1.08609e-10	1.81939e+06	4/105/678	5.25736
Ratio	Large White	SM C16:0 / SM C18:0	2	ALGA0013963	59117451	A	G	0.072	0.071503	0.01082	7.17764e-11	1.50217e+06	4/105/678	7.71239
Ratio	Large White	SM (OH) C12:2 / SM C18:1	2	ALGA0013963	59117451	A	G	0.072	0.12462	0.0196609	3.91551e-10	504662	4/105/678	5.15971
Ratio	Large White	SM C16:1 / SM C18:1	2	ASGA0010487	60428931	A	C	0.088	0.0713501	0.0104898	2.05064e-11	6.04092e+08	4/130/653	5.55233
Ratio	Large White	SM C16:0 / SM C18:1	2	ASGA0010487	60428931	A	C	0.088	0.0731439	0.0119372	1.414e-09	8.76079e+06	4/130/653	3.81938
Ratio	Large White	SM C16:0 / SM C18:0	2	ASGA0010487	60428931	A	C	0.088	0.0555562	0.00993786	3.13027e-08	805987	4/130/653	4.55344
Ratio	Large White	SM C16:1 / SM C18:1	2	ALGA0013946	60455290	A	G	0.072	0.0956484	0.0112618	1.0056e-16	6296048536100	4/106/677	4.49383
Ratio	Large White	SM C16:0 / SM C18:0	2	ALGA0013946	60455290	A	G	0.072	0.0742202	0.0107074	8.69732e-12	3.21032e+07	4/106/677	4.7661
Ratio	Large White	SM C16:0 / SM C18:1	2	ALGA0013946	60455290	A	G	0.072	0.0863843	0.0129907	5.50784e-11	1.14951e+07	4/106/677	8.39612
Ratio	Large White	SM (OH) C12:2 / SM C18:1	2	ALGA0013946	60455290	A	G	0.072	0.122881	0.01958	5.75321e-10	1.10048e+06	4/106/677	4.87147
Ratio	Large White	SM C16:1 / SM C18:0	2	ALGA0013946	60455290	A	G	0.072	0.123144	0.0193978	3.68335e-10	758038	4/106/677	5.75393
Ratio	Large White	SM (OH) C22:1 / SM C18:0	2	ALGA0013946	60455290	A	G	0.072	0.0812805	0.0133569	1.81898e-09	153500	4/106/677	5.31975
Ratio	Large White	SM C16:1 / SM C18:1	2	M1GA0002940	60663362	A	G	0.093	0.0757486	0.0103069	5.01854e-13	1.41306e+09	7/133/647	6.4223
Ratio	Large White		2	M1GA0002940	60663362	A	G	0.093	0.061845	0.00969291	3.01979e-10	766422	7/133/647	4.91839
Ratio	Large White	SM C16:0 / SM C18:1	2	M1GA0002940	60663362	A	G	0.093	0.0702346	0.011742	3.36092e-09	211000	7/133/647	4.34847
Ratio	Large White	SM C16:1 / SM C18:1	2	ASGA0096884	64683710	A	G	0.116	0.0655388	0.00939993	6.63253e-12	2.14959e+09	9/164/614	5.81758
Ratio	Large White	SM C16:1 / SM C18:0	2	ASGA0096884	64683710	A	G	0.116	0.0958856	0.0159212	2.63952e-09	739189	9/164/614	4.40569
Ratio	Large White	PC aa C32:0 / PC ae C34:1	2	DIAS0003568	64802739	A	G	0.309	0.0454072	0.00789346	1.26094e-08	2.97977e+06	71/344/371	4.04001
Ratio	Large White	PC aa C32:0 / PC ae C34:1	2	ALGA0108179	64814335	C	A	0.309	0.0452773	0.0079004	1.42437e-08	2.6309e+06	71/345/371	4.00618
Ratio	Large White	SM C16:0 / SM C18:1	2	H3GA0006831	65349052	G	A	0.058	0.098847	0.0141331	5.73304e-12	8.13263e+07	2/86/693	4.43036
Ratio	Large White	SM C16:1 / SM C18:1	2	H3GA0006831	65349052	G	A	0.058	0.0799199	0.0125091	2.86425e-10	1.62781e+06	2/86/693	4.96688
Ratio	Large White	SM C16:0 / SM C18:0	2	H3GA0006831	65349052	G	A	0.058	0.0690461	0.0118411	8.05097e-09	481954	2/86/693	4.02196
Ratio	Large White	SM C18:0 / SM C24:1	2	H3GA0006831	65349052	G	A	0.058	-0.101371	0.0177197	1.50885e-08	257163	2/86/693	5.8941
Ratio	Large White	SM C18:1 / SM C24:1	2	H3GA0006831	65349052	G	A	0.058	-0.0759938	0.0126297	2.72575e-09	171053	2/86/693	4.17195
Ratio	Large White	PC aa C32:1 / PC ae C34:1	2	M1GA0002934	65666678	A	G	0.257	0.0434803	0.0067431	1.98023e-10	4.43743e+06	46/313/428	5.01801
Ratio	Large White	PC aa C32:0 / PC ae C34:1	2	M1GA0002934	65666678	A	G	0.257	0.0512067	0.0080272	3.04408e-10	2.88662e+06	46/313/428	4.9165
Single	Large White	SM C18:0	2	DBMA0000048	65916479	A	G	0.07	-0.283179	0.0545783	2.70286e-07	-	4/102/681	3.3075
Ratio	Large White	SM C16:1 / SM C18:1	2	DBMA0000048	65916479	A	G	0.07	0.0990159	0.0112474	8.40852e-18	332602804891	4/102/681	6.64889
Ratio	Large White	SM C18:0 / SM C24:0	2	DBMA0000048	65916479	A	G	0.07	-0.108191	0.0144507	1.90174e-13	1.42125e+06	4/102/681	8.96486
Single	Large White	SM C18:1	2	INRA0008800	66008692	C	A	0.058	-0.135623	0.0265018	3.89838e-07	-	3/85/699	3.22051
Single	Large White	SM C18:0	2	INRA0008800	66008692	C	A	0.058	-0.303788	0.0601784	5.55243e-07	-	3/85/699	3.13651
Ratio	Large White	SM C16:1 / SM C18:1	2	INRA0008800	66008692	C	A	0.058	0.113446	0.0123496	3.57684e-19	1089894381690	3/85/699	6.12786
Ratio	Large White	SM C16:0 / SM C18:1	2	INRA0008800	66008692	C	A	0.058	0.111594	0.0141911	1.23598e-14	3.15408e+07	3/85/699	6.62159
Ratio	Large White	SM C16:0 / SM C18:0	2	INRA0008800	66008692	C	A	0.058	0.0894005	0.0117677	8.64606e-14	6.42192e+06	3/85/699	9.68409
Ratio	Large White	SM C18:0 / SM C24:1	2	INRA0008800	66008692	C	A	0.058	-0.134003	0.0177294	1.14315e-13	4.85712e+06	3/85/699	6.83264
Ratio	Large White	SM C18:0 / SM C24:0	2	INRA0008800	66008692	C	A	0.058	-0.118997	0.0159291	2.13766e-13	2.59744e+06	3/85/699	6.76757
Ratio	Large White	SM (OH) C12:2 / SM C18:1	2	INRA0008800	66008692	C	A	0.058	0.154437	0.0215466	1.76629e-12	220710	3/85/699	7.28494
Ratio	Large White	SM C16:1 / SM C18:1	2	ASGA0010421	66111292	G	A	0.093	0.0774234	0.00997467	2.61272e-14	2.78186e+09	7/133/647	5.45826
Ratio	Large White	SM C18:0 / SM C24:0	2	ASGA0010421	66111292	G	A	0.093	-0.0885749	0.0127005	6.54917e-12	1.55718e+06	7/133/647	5.82055
Ratio	Large White	SM (OH) C22:1 / SM C18:0	2	ASGA0010421	66111292	G	A	0.093	0.0785033	0.0116462	3.05861e-11	333426	7/133/647	7.1111
Single	Large White	SM C18:0	2	MARC0090681	66370420	G	A	0.069	-0.297985	0.0549429	7.79053e-08	-	4/100/683	3.60293
Single	Large White	SM C18:1	2	MARC0090681	66370420	G	A	0.069	-0.119238	0.0243565	1.19089e-06	-	4/100/683	2.95529
Ratio	Large White	SM C16:1 / SM C18:1	2	MARC0090681	66370420	G	A	0.069	0.100806	0.0113253	3.80008e-18	313386214662	4/100/683	6.75314
Ratio	Large White	SM C18:0 / SM C24:0	2	MARC0090681	66370420	G	A	0.069	-0.109812	0.0145454	1.21614e-13	640597	4/100/683	9.14625
Ratio	Large White	SM C16:1 / SM C18:1	2	DRGA0003010	66398764	C	A	0.078	0.0843283	0.0109231	3.54635e-14	6.02471e+08	6/110/671	5.28012
Ratio	Large White	SM (OH) C22:1 / SM C18:0	2	DRGA0003010	66398764	C	A	0.078	0.0841983	0.012712	6.51675e-11	336326	6/110/671	5.27474
Ratio	Large White	SM C18:0 / SM C24:0	2	DRGA0003010	66398764	C	A	0.078	-0.0919393	0.0138882	6.66717e-11	328738	6/110/671	7.04006
Ratio	Large White	SM C16:1 / SM C18:1	2	MARC0013967	67373064	A	G	0.131	0.0637677	0.00865608	4.43941e-13	8.37914e+07	17/172/598	5.67503
Ratio	Large White	SM C18:0 / SM C24:0	2	MARC0013967	67373064	A	G	0.131	-0.0752931	0.010942	1.21682e-11	270531	17/172/598	6.45095
Single	Large White	SM C18:0	2	MARC0052150	68284178	G	A	0.078	-0.276295	0.0515282	1.08398e-07	-	1/120/663	3.53751
Single	Large White	SM C18:1	2	MARC0052150	68284178	G	A	0.078	-0.112896	0.0228685	9.71052e-07	-	1/120/663	3.0149
Ratio	Large White	SM C16:1 / SM C18:1	2	MARC0052150	68284178	G	A	0.078	0.091513	0.0105378	2.19953e-17	4.41482e+10	1/120/663	7.30952
Ratio	Large White	SM C18:0 / SM C24:0	2	MARC0052150	68284178	G	A	0.078	-0.10737	0.0136552	1.24262e-14	8.72336e+06	1/120/663	8.77536
Ratio	Large White	SM C16:1 / SM C18:1	2	DRGA0003006	68534886	G	A	0.152	0.056192	0.00824536	1.88181e-11	1.39174e+07	21/198/568	5.14465
Ratio	Large White	SM C18:0 / SM C24:0	2	DRGA0003006	68534886	G	A	0.152	-0.067635	0.0103523	1.1577e-10	341752	21/198/568	5.57254
Ratio	Large White	PC aa C32:1 / PC ae C34:1	2	ALGA0013764	68819487	A	G	0.262	0.0389549	0.00674446	1.10426e-08	207258	46/320/421	4.06655
Single	Large White	SM C18:0	2	INRA0008792	68962623	G	A	0.082	-0.290776	0.0501677	9.8388e-09	-	4/121/662	4.09392
Single	Large White	SM C18:1	2	INRA0008792	68962623	G	A	0.082	-0.120375	0.0222331	8.19277e-08	-	4/121/662	2.0904
Ratio	Large White	SM C16:1 / SM C18:1	2	INRA0008792	68962623	G	A	0.082	0.0999952	0.010203	1.80971e-21	45271078894800	4/121/662	7.30926
Ratio	Large White	SM C18:0 / SM C24:0	2	INRA0008792	68962623	G	A	0.082	-0.111041	0.0132469	2.39742e-16	4.10391e+07	4/121/662	6.74475
Ratio	Large White	SM (OH) C22:1 / SM C18:0	2	INRA0008792	68962623	G	A	0.082	0.0954097	0.0121112	1.113e-14	883987	4/121/662	8.19629
Ratio	Large White	SM (OH) C12:2 / SM C18:1	2	INRA0008792	68962623	G	A	0.082	0.135201	0.0179203	1.26075e-13	649834	4/121/662	7.03562
Ratio	Large White	SM C16:0 / SM C18:0	2	INRA0008792	68962623	G	A	0.082	0.0758733	0.00983125	3.61486e-14	272177	4/121/662	10.8771
Ratio	Large White	SM C16:1+C458:C486 / SM C18:1	2	ASGA0010401	70010936	G	A	0.156	0.0569706	0.00820323	7.96357e-12	4.72519e+07	21/203/563	5.77464
Single	Large White	SM C18:1	2	CASI0012538	70039900	A	C	0.068	-0.138865	0.024102	1.19776e-08	-	4/99/683	2.28319
Single	Large White	SM C18:0	2	CASI0012538	70039900	A	C	0.068	-0.310713	0.0546528	1.84405e-08	-	4/99/683	3.94975
Ratio	Large White	SM C16:1 / SM C18:1	2	CASI0012538	70039900	A	C	0.068	0.113966	0.0110438	1.701e-23	704149563962000	4/99/683	8.02843
Ratio	Large White	SM C16:0 / SM C18:1	2	CASI0012538	70039900	A	C	0.068	0.113704	0.0127902	4.1616e-18	2.87812e+09	4/99/683	8.28872
Ratio	Large White	SM C16:0 / SM C18:0	2	CASI0012538	70039900	A	C	0.068	0.0914172	0.0105992	3.53654e-17	5.21428e+08	4/99/683	6.81786
Ratio	Large White	SM C18:0 / SM C24:0	2	CASI0012538	70039900	A	C	0.068	-0.1225	0.0144135	9.60305e-17	1.92028e+08	4/99/683	6.88816
Ratio	Large White	SM (OH) C12:2 / SM C18:1	2	CASI0012538	70039900	A	C	0.068	0.162588	0.0192906	1.67315e-16	7.15869e+07	4/99/683	8.41651
Ratio	Large White	SM (OH) C22:1 / SM C18:0	2	CASI0012538	70039900	A	C	0.068	0.108691	0.0131218	5.17417e-16	3.56396e+07	4/99/683	11.9319
Ratio	Large White	SM C18:0 / SM C24:1	2	CASI0012538	70039900	A	C	0.068	-0.131717	0.0159746	6.92436e-16	2.66314e+07	4/99/683	8.64604
Ratio	Large White	SM (OH) C22:1 / SM C18:1	2	CASI0012538	70039900	A	C	0.068	0.132674	0.0173116	5.34091e-14	224261	4/99/683	6.95303
Ratio	Large White	SM (OH) C12:2 / SM C18:0	2	CASI0012538	70039900	A	C	0.068	0.18172	0.0239626	9.5372e-14	193354	4/99/683	9.13607
Ratio	Large White	SM C18:1 / SM C24:1	2	CASI0012538	70039900	A	C	0.068	-0.0877077	0.0115021	7.05508e-14	169772	4/99/683	7.96115
Single	Large White	SM C18:0	2	DRGA0003003	70649393	A	T	0.078	-0.308269	0.0511619	2.59556e-09	-	4/115/666	4.4204
Single	Large White	SM C18:1	2	DRGA0003003	70649393	A	T	0.078	-0.127696	0.022677	2.49634e-08	-	4/115/666	2.11009
Ratio	Large White	SM C16:1 / SM C18:1	2	DRGA0003003	70649393	A	T	0.078	0.104957	0.0103772	1.10071e-22	2.26793e+14	4/115/666	7.76814
Ratio	Large White	SM C18:0 / SM C24:0	2	DRGA0003003	70649393	A	T	0.078	-0.114981	0.0135112	8.80233e-17	2.94872e+07	4/115/666	7.13483
Ratio	Large White	SM C16:0 / SM C18:0	2	DRGA0003003	70649393	A	T	0.078	0.081321	0.00998967	1.54594e-15	1.67895e+06	4/115/666	8.44637
Ratio	Large White	SM (OH) C22:1 / SM C18:0	2	DRGA0003003	70649393	A	T	0.078	0.100113	0.0123122	1.66e-15	1.5636e+06	4/115/666	11.5291
Ratio	Large White	SM (OH) C12:2 / SM C18:1	2	DRGA0003003	70649393	A	T	0.078	0.141685	0.0182442	2.53643e-14	984193	4/115/666	7.78462
Ratio	Large White	SM C16:0 / SM C18:1	2	DRGA0003003	70649393	A	T	0.078	0.0929324	0.0121874	7.05986e-14	353596	4/115/666	6.89616
Single	Large White	SM C18:1	2	MARC0013030	72639315	G	A	0.058	-0.12953	0.0270334	1.98079e-06	-	3/85/699	2.83449
Ratio	Large White	SM C16:1 / SM C18:1	2	MARC0013030	72639315	G	A	0.058	0.110349	0.0126419	1.53768e-17	1.28817e+11	3/85/699	5.37773
Ratio	Large White	SM C16:0 / SM C18:1	2	MARC0013030	72639315	G	A	0.058	0.117183	0.0143605	1.33151e-15	1.48763e+09	3/85/699	6.40282
Ratio	Large White	SM C16:0 / SM C18:0	2	MARC0013030	72639315	G	A	0.058	0.0859246	0.0120403	2.18576e-12	1.11287e+07	3/85/699	8.8268
Ratio	Large White	SM (OH) C12:2 / SM C18:1	2	MARC0013030	72639315	G	A	0.058	0.160129	0.0218237	5.45459e-13	3.63142e+06	3/85/699	5.52087
Ratio	Large White	SM C18:0 / SM C24:0	2	MARC0013030	72639315	G	A	0.058	-0.111136	0.0163883	2.34402e-11	1.03773e+06	3/85/699	6.07794
Ratio	Large White	SM (OH) C22:1 / SM C18:0	2	MARC0013030	72639315	G	A	0.058	0.099833	0.0149274	4.30603e-11	564897	3/85/699	5.21929
Ratio	Large White	SM C18:0 / SM C24:1	2	MARC0013030	72639315	G	A	0.058	-0.120549	0.0183117	8.43597e-11	288344	3/85/699	7.80088
Ratio	Large White	SM C16:1 / SM C18:1	2	MARC0053561	74152932	G	A	0.103	0.0737636	0.00968411	7.49517e-14	1.28829e+09	13/136/638	4.6379
Ratio	Large White	SM (OH) C12:2 / SM C18:1	2	MARC0053561	74152932	G	A	0.103	0.108244	0.0165135	1.00972e-10	956299	13/136/638	5.1769
Ratio	Large White	SM C16:0 / SM C18:1	2	MARC0053561	74152932	G	A	0.103	0.071615	0.0110065	1.37071e-10	704448	13/136/638	6.86592
Ratio	Large White	SM (OH) C22:1 / SM C18:0	2	MARC0053561	74152932	G	A	0.103	0.069811	0.011284	9.89415e-10	180655	13/136/638	5.10481
Ratio	Large White	SM C16:1 / SM C18:1	2	MARC0048160	75436283	A	C	0.114	0.0697752	0.00908456	4.72869e-14	8.5024e+08	15/150/622	5.79064
Ratio	Large White	SM (OH) C12:2 / SM C18:1	2	MARC0048160	75436283	A	C	0.114	0.107405	0.0154426	7.43895e-12	5.40469e+06	15/150/622	6.97314
Ratio	Large White	SM C16:0 / SM C18:1	2	MARC0048160	75436283	A	C	0.114	0.066951	0.0103435	1.69673e-10	236957	15/150/622	5.05448
Ratio	Large White	SM C16:1 / SM C18:1	2	MARC0030590	75803153	A	G	0.102	0.0762975	0.00972443	1.40889e-14	3.24621e+09	13/134/640	5.32899
Ratio	Large White	SM (OH) C12:2 / SM C18:1	2	MARC0030590	75803153	A	G	0.102	0.110394	0.0165861	5.29609e-11	863569	13/134/640	7.25455
Ratio	Large White	SM C16:0 / SM C18:1	2	MARC0030590	75803153	A	G	0.102	0.0726473	0.0110581	9.19389e-11	497455	13/134/640	5.199
Ratio	Large White	SM C16:1 / SM C18:1	2	MARC0064431	76006061	A	G	0.102	0.0762975	0.00972443	1.40889e-14	3.24621e+09	13/134/640	5.32899
Ratio	Large White	SM (OH) C12:2 / SM C18:1	2	MARC0064431	76006061	A	G	0.102	0.110394	0.0165861	5.29609e-11	863569	13/134/640	7.25455
Ratio	Large White	SM C16:0 / SM C18:1	2	MARC0064431	76006061	A	G	0.102	0.0726473	0.0110581	9.19389e-11	497455	13/134/640	5.199
Ratio	Large White	SM C16:1 / SM C18:1	2	MARC0039652	76115641	C	A	0.102	0.0762975	0.00972443	1.40889e-14	3.24621e+09	13/134/640	5.32899
Ratio	Large White	SM (OH) C12:2 / SM C18:1	2	MARC0039652	76115641	C	A	0.102	0.110394	0.0165861	5.29609e-11	863569	13/134/640	7.25455
Ratio	Large White	SM C16:0 / SM C18:1	2	MARC0039652	76115641	C	A	0.102	0.0726473	0.0110581	9.19389e-11	497455	13/134/640	5.199
Ratio	Large White	SM C16:1 / SM C18:1	2	MARC0029487	77439189	G	A	0.102	0.0762975	0.00972443	1.40889e-14	3.24621e+09	13/134/640	5.32899
Ratio	Large White	SM (OH) C12:2 / SM C18:1	2	MARC0029487	77439189	G	A	0.102	0.110394	0.0165861	5.29609e-11	863569	13/134/640	7.25455
Ratio	Large White	SM C16:0 / SM C18:1	2	MARC0029487	77439189	G	A	0.102	0.0726473	0.0110581	9.19389e-11	497455	13/134/640	5.199
Ratio	Large White	SM C16:1 / SM C18:1	2	MARC0055023	77761378	A	G	0.091	0.0836777	0.0103285	2.07748e-15	4.32063e+10	11/121/655	5.28128
Ratio	Large White	SM C16:0 / SM C18:1	2	MARC0055023	77761378	A	G	0.091	0.0820519	0.0116859	4.76736e-12	1.8828e+07	11/121/655	5.78562
Ratio	Large White	SM (OH) C12:2 / SM C18:1	2	MARC0055023	77761378	A	G	0.091	0.121981	0.0175464	7.59962e-12	1.18111e+07	11/121/655	7.69806
Ratio	Large White	SM (OH) C22:1 / SM C18:0	2	MARC0055023	77761378	A	G	0.091	0.0796305	0.012021	6.48469e-11	2.66607e+06	11/121/655	5.27674
Ratio	Large White	SM C16:0 / SM C18:0	2	MARC0055023	77761378	A	G	0.091	0.0647959	0.00978601	6.6109e-11	2.61517e+06	11/121/655	4.78633
Ratio	Large White	SM (OH) C22:1 / SM C18:1	2	MARC0055023	77761378	A	G	0.091	0.0989127	0.0157258	5.28135e-10	169957	11/121/655	5.89509
Ratio	Large White	SM C16:1 / SM C18:1	2	MARC0040459	77810469	A	G	0.09	0.084518	0.0103226	1.07869e-15	9.3971e+10	11/120/655	5.27899
Ratio	Large White	SM C16:0 / SM C18:1	2	MARC0040459	77810469	A	G	0.09	0.0834741	0.0116824	2.05753e-12	4.92657e+07	11/120/655	5.73259
Ratio	Large White	SM (OH) C12:2 / SM C18:1	2	MARC0040459	77810469	A	G	0.09	0.12142	0.0175624	9.80711e-12	1.0336e+07	11/120/655	7.85871
Ratio	Large White	SM (OH) C22:1 / SM C18:0	2	MARC0040459	77810469	A	G	0.09	0.0796197	0.0120298	6.72703e-11	3.99893e+06	11/120/655	5.27215
Ratio	Large White	SM C16:0 / SM C18:0	2	MARC0040459	77810469	A	G	0.09	0.0647777	0.00979398	6.92497e-11	3.88463e+06	11/120/655	4.91096
Ratio	Large White	SM (OH) C22:1 / SM C18:1	2	MARC0040459	77810469	A	G	0.09	0.100207	0.0157279	3.19566e-10	317199	11/120/655	6.09939
Ratio	Large White	SM C16:1 / SM C18:1	2	ASGA0010517	78991922	A	G	0.141	0.0483063	0.00863288	3.0403e-08	776006	12/198/577	3.8263
Ratio	Large White	ADMA / total-DMA	3	M1GA0004305	40274078	G	A	0.059	0.084442	0.0162542	2.61174e-07	255825	4/85/697	3.31973
Ratio	Large White	ADMA / total-DMA	3	M1GA0004309	40354181	G	A	0.059	0.0845806	0.0162521	2.48983e-07	274237	4/85/698	3.327
Ratio	Large White	ADMA / total-DMA	3	M1GA0004308	40379884	G	A	0.059	0.0845806	0.0162521	2.48983e-07	274237	4/85/698	3.327
Ratio	Large White	ADMA / total-DMA	3	ALGA0117853	40699890	A	G	0.059	0.0845806	0.0162521	2.48983e-07	274237	4/85/698	3.327
Ratio	Large White	ADMA / total-DMA	3	ASGA0100052	42622617	G	A	0.062	0.0799092	0.0158279	5.53863e-07	150081	5/87/695	3.1371
Single	Duroc	SM C26:1	4	ASGA0019102	28084136	G	A	0.449	-0.0245405	0.00510377	2.48021e-06	-	54/149/83	7.47923
Ratio	Duroc	PC ae C38:2 / SM (OH) C14:1	4	ASGA0085258	93440441	A	G	0.086	-0.0718366	0.0131295	9.86e-08	206975	1/47/238	9.47534
Single	Duroc	C14:1	4	ASGA0021977	109186294	G	A	0.098	0.31475	0.0652889	2.34e-06	-	1/54/231	7.51547
Single	Duroc	C14:1	4	ALGA0028020	109206088	A	G	0.098	0.31475	0.0652889	2.34e-06	-	1/54/231	7.51547
Single	Duroc	C14:1	4	ALGA0028021	109249636	A	G	0.098	0.31475	0.0652889	2.34e-06	-	1/54/231	7.51547
Single	Duroc	C14:1	4	MARC0054103	109278757	G	A	0.098	0.31475	0.0652889	2.34e-06	-	1/54/231	7.51547
Single	Duroc	C14:1	4	ALGA0028032	109503980	G	A	0.098	0.31475	0.0652889	2.34e-06	-	1/54/231	7.51547
Single	Duroc	C14:1	4	H3GA0014144	109522023	C	A	0.098	0.31475	0.0652889	2.34e-06	-	1/54/231	7.51547
Single	Duroc	C14:1	4	ASGA0021997	109578232	A	G	0.098	0.31475	0.0652889	2.34e-06	-	1/54/231	7.51547
Ratio	Duroc	PC aa C36:1 / PC aa C36:4	4	H3GA0014519	121432780	G	A	0.42	0.0653798	0.0121998	1.74079e-07	191781	49/142/95	9.12548
Ratio	Duroc	PC aa C34:1 / PC aa C36:1	4	H3GA0014519	121432780	G	A	0.42	-0.0621	0.0116152	1.85481e-07	179991	49/142/95	9.08638
Ratio	Duroc	PC aa C36:1 / PC aa C36:4	4	MARC0038126	121455532	G	A	0.42	0.0653798	0.0121998	1.74079e-07	191781	49/142/95	9.12548
Ratio	Duroc	PC aa C34:1 / PC aa C36:1	4	MARC0038126	121455532	G	A	0.42	-0.0621	0.0116152	1.85481e-07	179991	49/142/95	9.08638
Ratio	Duroc	PC aa C36:1 / PC aa C36:4	4	ALGA0028959	121475774	A	G	0.42	0.0653798	0.0121998	1.74079e-07	191781	49/142/95	9.12548
Ratio	Duroc	PC aa C34:1 / PC aa C36:1	4	ALGA0028959	121475774	A	G	0.42	-0.0621	0.0116152	1.85481e-07	179991	49/142/95	9.08638
Ratio	Duroc	PC aa C36:1 / PC aa C36:4	4	ALGA0028960	121496005	C	A	0.421	0.0679155	0.0121792	5.74956e-08	480328	49/142/94	9.83746
Ratio	Duroc	PC aa C34:1 / PC aa C36:1	4	ALGA0028960	121496005	C	A	0.421	-0.0634071	0.0116065	1.02873e-07	268454	49/142/94	9.47927
Ratio	Duroc	PC aa C34:1 / PC aa C36:1	4	ALGA0028963	121510262	G	A	0.381	0.0733219	0.0108083	6.87212e-11	4.04397e+08	41/136/109	10.8561
Ratio	Duroc	PC aa C36:1 / PC aa C36:4	4	ALGA0028963	121510262	G	A	0.381	-0.0722607	0.0115082	1.28353e-09	2.16517e+07	41/136/109	9.72911
Ratio	Duroc	PC aa C36:1 / SM C22:3	4	ALGA0028963	121510262	G	A	0.381	-0.0670772	0.0113658	1.03025e-08	2.69747e+06	41/136/109	12.1153
Ratio	Duroc	PC aa C36:1 / PC aa C36:5	4	ALGA0028963	121510262	G	A	0.381	-0.185294	0.0333746	6.52224e-08	426091	41/136/109	13.8607
Ratio	Duroc	PC aa C36:1 / PC aa C36:4	4	ALGA0028952	121563658	C	A	0.421	0.0679155	0.0121792	5.74956e-08	480328	49/142/94	9.83746
Ratio	Duroc	PC aa C34:1 / PC aa C36:1	4	ALGA0028952	121563658	C	A	0.421	-0.0634071	0.0116065	1.02873e-07	268454	49/142/94	9.47927
Ratio	Duroc	PC aa C36:1 / PC aa C36:4	4	MARC0042560	121603127	A	G	0.413	0.0639073	0.0120768	2.43722e-07	148010	49/138/99	8.91794
Ratio	Duroc	PC aa C34:1 / PC aa C36:1	4	ALGA0028983	121768098	G	A	0.378	0.0721301	0.0108783	1.69861e-10	2.01252e+08	40/136/110	10.5428
Ratio	Duroc	PC aa C36:1 / PC aa C36:4	4	ALGA0028983	121768098	G	A	0.378	-0.071541	0.0115879	2.31647e-09	1.47573e+07	40/136/110	9.64033
Ratio	Duroc	PC aa C36:1 / SM C22:3	4	ALGA0028983	121768098	G	A	0.378	-0.0664367	0.0114434	1.72384e-08	1.98307e+06	40/136/110	11.7597
Ratio	Duroc	PC aa C36:1 / PC aa C36:5	4	ALGA0028983	121768098	G	A	0.378	-0.185402	0.033564	7.53758e-08	453525	40/136/110	13.3242
Ratio	Duroc	PC aa C34:1 / PC aa C36:1	4	H3GA0014530	121844025	A	G	0.388	0.0727157	0.010795	9.12845e-11	4.56634e+08	42/138/106	11.3242
Ratio	Duroc	PC aa C36:1 / PC aa C36:4	4	H3GA0014530	121844025	A	G	0.388	-0.0730445	0.0114744	7.8456e-10	5.31299e+07	42/138/106	8.73837
Ratio	Duroc	PC aa C36:1 / SM C22:3	4	H3GA0014530	121844025	A	G	0.388	-0.0684401	0.0113247	4.7625e-09	8.75247e+06	42/138/106	10.091
Ratio	Duroc	PC aa C36:1 / PC aa C36:5	4	H3GA0014530	121844025	A	G	0.388	-0.188583	0.0332853	3.61258e-08	1.15385e+06	42/138/106	12.4108
Ratio	Duroc	PC aa C36:2 / PC aa C36:4	4	H3GA0014530	121844025	A	G	0.388	-0.0212749	0.0040655	3.25972e-07	254355	42/138/106	13.6927
Ratio	Duroc	PC aa C34:1 / PC aa C36:1	4	H3GA0014537	121858553	G	A	0.403	0.0672305	0.0111442	5.04942e-09	5.29326e+06	42/136/95	9.66363
Ratio	Duroc	PC aa C36:1 / PC aa C36:4	4	H3GA0014537	121858553	G	A	0.403	-0.0668724	0.011866	4.22588e-08	632480	42/136/95	10.4214
Ratio	Duroc	PC aa C36:1 / SM C22:3	4	H3GA0014537	121858553	G	A	0.403	-0.0631963	0.0116942	1.38779e-07	192593	42/136/95	11.7631
Ratio	Duroc	PC aa C36:1 / PC aa C36:4	4	ALGA0028999	121885250	A	G	0.323	0.0808008	0.0127421	9.02625e-10	8.23635e+06	33/119/134	11.2536
Ratio	Duroc	PC aa C36:1 / SM C22:3	4	ALGA0028999	121885250	A	G	0.323	0.0756429	0.0125607	5.35184e-09	1.38912e+06	33/119/134	12.3267
Ratio	Duroc	PC aa C34:1 / PC aa C36:1	4	ALGA0028999	121885250	A	G	0.323	-0.0683081	0.0121791	4.86306e-08	152874	33/119/134	9.90907
Ratio	Duroc	PC aa C36:1 / PC aa C36:4	4	MARC0021142	121957530	G	A	0.406	-0.0685534	0.0113272	4.54081e-09	9.84716e+06	52/128/106	10.683
Ratio	Duroc	PC aa C34:1 / PC aa C36:1	4	MARC0021142	121957530	G	A	0.406	0.0641245	0.0107927	8.30773e-09	5.38223e+06	52/128/106	11.3531
Ratio	Duroc	PC aa C36:1 / SM C22:3	4	MARC0021142	121957530	G	A	0.406	-0.0651827	0.0111448	1.3695e-08	3.265e+06	52/128/106	10.9869
Ratio	Duroc	PC aa C34:1 / PC aa C36:1	4	ALGA0029016	122058519	A	G	0.379	0.0739853	0.010774	4.1796e-11	1.0873e+09	40/137/109	11.4476
Ratio	Duroc	PC aa C36:1 / PC aa C36:4	4	ALGA0029016	122058519	A	G	0.379	-0.0736422	0.0114998	6.31776e-10	7.1932e+07	40/137/109	9.09819
Ratio	Duroc	PC aa C36:1 / SM C22:3	4	ALGA0029016	122058519	A	G	0.379	-0.0690241	0.0113517	3.8843e-09	1.16996e+07	40/137/109	10.1726
Ratio	Duroc	PC aa C36:1 / PC aa C36:5	4	ALGA0029016	122058519	A	G	0.379	-0.190226	0.0334253	3.16133e-08	1.43753e+06	40/137/109	12.5406
Ratio	Duroc	PC aa C36:2 / PC aa C36:4	4	ALGA0029016	122058519	A	G	0.379	-0.0217765	0.00407019	1.81961e-07	404997	40/137/109	14.1543
Ratio	Duroc	PC aa C36:1 / PC aa C36:4	4	DRGA0005306	122390074	A	G	0.327	0.081928	0.0127106	4.97012e-10	1.40996e+07	33/121/132	11.1547
Ratio	Duroc	PC aa C36:1 / SM C22:3	4	DRGA0005306	122390074	A	G	0.327	0.0752913	0.0125647	6.30049e-09	1.11224e+06	33/121/132	12.6841
Ratio	Duroc	PC aa C34:1 / PC aa C36:1	4	DRGA0005306	122390074	A	G	0.327	-0.0696947	0.0121312	2.37822e-08	294661	33/121/132	10.3465
Ratio	Duroc	PC aa C36:1 / PC aa C36:4	4	DRGA0005309	122418721	A	G	0.423	0.0689783	0.0122776	4.62754e-08	942249	47/148/91	9.93949
Ratio	Duroc	PC aa C34:1 / PC aa C36:1	4	DRGA0005309	122418721	A	G	0.423	-0.0651876	0.0116211	4.8433e-08	900275	47/148/91	9.91156
Ratio	Duroc	PC aa C36:1 / PC aa C36:4	4	DBWU0000729	122521618	G	A	0.439	0.0646316	0.0123416	3.19827e-07	170616	49/153/84	8.75013
Ratio	Duroc	PC aa C36:1 / PC aa C36:4	4	ASGA0022861	122556101	G	A	0.42	0.07071	0.0122093	1.85909e-08	1.97466e+06	47/146/93	9.18395
Ratio	Duroc	PC aa C34:1 / PC aa C36:1	4	ASGA0022861	122556101	G	A	0.42	-0.0662123	0.0115772	2.72643e-08	1.34647e+06	47/146/93	10.4968
Ratio	Duroc	PC aa C36:1 / SM C22:3	4	ASGA0022861	122556101	G	A	0.42	0.0649291	0.0120732	1.58322e-07	231874	47/146/93	10.2631
Ratio	Duroc	PC aa C34:1 / PC aa C36:1	4	MARC0067753	122909795	G	A	0.413	-0.0641111	0.0117791	1.14044e-07	1.0871e+06	45/146/95	8.80858
Ratio	Duroc	PC aa C36:1 / PC aa C36:4	4	MARC0067753	122909795	G	A	0.413	0.0656237	0.0124854	2.90951e-07	314272	45/146/95	9.38588
Ratio	Duroc	PC aa C34:1 / PC aa C36:1	4	M1GA0006616	123053034	A	G	0.421	-0.0629563	0.0115017	9.74613e-08	1.69224e+06	48/145/93	9.48248
Ratio	Duroc	PC aa C34:1 / PC aa C36:1	4	ALGA0029144	123267670	A	G	0.413	-0.060628	0.0114492	2.39321e-07	803790	48/140/98	8.92918
Ratio	Duroc	PC aa C34:1 / PC aa C36:1	4	MARC0071762	128112246	A	G	0.371	-0.0567759	0.0116811	1.94689e-06	141481	31/150/105	7.62996
Ratio	Duroc	PC aa C34:1 / PC aa C36:1	4	ALGA0029576	128218375	A	C	0.484	0.0567461	0.0113283	9.65391e-07	165701	57/163/66	8.06593
Single	Large White	ADMA	4	MARC0074419	129953313	C	A	0.206	0.081494	0.0129616	5.36335e-10	-	29/266/492	2.22456
Single	Large White	ADMA	4	M1GA0006938	130375500	G	A	0.206	0.081494	0.0129616	5.36335e-10	-	29/266/492	2.22456
Single	Large White	ADMA	4	MARC0030292	130543416	A	G	0.15	0.114571	0.0147538	2.54619e-14	-	13/210/564	3.58189
Single	Large White	total-DMA	4	MARC0030292	130543416	A	G	0.15	0.104875	0.0193959	8.5127e-08	-	13/210/564	7.1171
Ratio	Duroc	PC aa C32:3 / PC aa C36:1	5	H3GA0016328	54285887	G	A	0.189	5.46176	0.856367	7.32871e-10	2.1902e+07	10/88/188	9.05854
Ratio	Duroc	PC aa C28:1 / PC aa C36:1	5	H3GA0016328	54285887	G	A	0.189	1.71918	0.322099	1.94048e-07	184315	10/88/188	12.4516
Ratio	Duroc	PC aa C36:1 / PC ae C32:1	5	H3GA0016328	54285887	G	A	0.189	-1.25934	0.231527	1.16108e-07	148300	10/88/188	9.37483
Ratio	Duroc	PC aa C32:3 / PC aa C36:1	5	ASGA0025564	54359183	G	A	0.201	5.44364	0.907761	6.1487e-09	384308	6/103/177	11.1695
Ratio	Duroc	PC aa C32:3 / PC aa C36:1	5	ALGA0032040	56960624	G	A	0.157	6.37749	0.93033	4.48998e-11	2.40849e+08	3/84/199	8.96356
Ratio	Duroc	PC aa C28:1 / PC aa C36:1	5	ALGA0032040	56960624	G	A	0.157	1.94391	0.36632	2.26358e-07	224606	3/84/199	14.1121
Ratio	Duroc	PC aa C32:3 / PC aa C36:1	5	INRA0019441	56993809	A	C	0.157	6.37749	0.93033	4.48998e-11	2.40849e+08	3/84/199	8.96356
Ratio	Duroc	PC aa C28:1 / PC aa C36:1	5	INRA0019441	56993809	A	C	0.157	1.94391	0.36632	2.26358e-07	224606	3/84/199	14.1121
Ratio	Duroc	PC aa C32:3 / PC aa C36:1	5	MARC0065548	57038914	A	C	0.157	6.37749	0.93033	4.48998e-11	2.40849e+08	3/84/199	8.96356
Ratio	Duroc	PC aa C28:1 / PC aa C36:1	5	MARC0065548	57038914	A	C	0.157	1.94391	0.36632	2.26358e-07	224606	3/84/199	14.1121
Single	Large White	alpha-AAA	5	ASGA0026017	66734388	A	G	0.356	-0.270316	0.0544563	8.48149e-07	-	106/347/333	3.03963
Single	Large White	Ile	5	H3GA0016622	66885632	A	G	0.498	-0.0417603	0.00851021	1.12493e-06	-	198/372/201	3.02856
Single	Large White	Phe	5	H3GA0016622	66885632	A	G	0.498	-0.0361057	0.00741114	1.33855e-06	-	198/372/201	2.98647
Single	Duroc	His	5	DIAS0000497	87611954	G	A	0.327	0.240403	0.0499613	2.44056e-06	-	31/125/130	7.48927
Single	Duroc	Ac-Orn	6	M1GA0008302	6674723	A	G	0.451	-0.285601	0.0605364	3.75582e-06	-	61/136/89	7.2206
Single	Duroc	Ac-Orn	6	M1GA0008329	6827457	G	A	0.446	-0.297511	0.0603428	1.40326e-06	-	60/135/91	7.83361
Single	Duroc	Ac-Orn	6	ALGA0034480	6940800	A	G	0.497	0.296237	0.0616439	2.51119e-06	-	70/144/72	7.4715
Single	Large White	Gly	6	DIAS0000116	7037256	C	A	0.306	0.0398641	0.00817386	1.30462e-06	-	65/351/371	2.93363
Single	Duroc	Ac-Orn	6	MARC0047037	7631685	A	G	0.423	0.326522	0.0639483	6.06334e-07	-	51/140/95	8.35435
Single	Duroc	Ac-Orn	6	MARC0034869	7718665	G	A	0.476	-0.388532	0.0583227	1.41495e-10	-	65/142/79	13.4328
Single	Duroc	Ac-Orn	6	MARC0036768	8382559	G	A	0.469	0.32732	0.0611205	1.77381e-07	-	65/138/83	9.1139
Single	Duroc	Ac-Orn	6	MARC0058421	8442332	A	G	0.446	-0.416869	0.0596556	2.01418e-11	-	57/141/88	14.5838
Single	Duroc	Ac-Orn	6	MARC0025924	8449207	G	A	0.402	-0.484617	0.0608985	4.29471e-14	-	46/138/102	18.1281
Ratio	Duroc	PC ae C36:1 / PC ae C36:2	6	H3GA0017558	12102011	G	A	0.135	-0.0607948	0.0113914	1.94538e-07	617007	1/75/210	9.057
Ratio	Large White	PC aa C36:1 / lysoPC a C16:0	6	MARC0035988	13158078	G	A	0.227	0.0995753	0.0157662	4.50435e-10	274968	37/283/467	4.82393
Ratio	Large White	PC aa C32:1 / PC aa C34:1	6	ASGA0027763	20905171	G	A	0.304	0.000466597	9.50692e-05	1.12002e-06	234800	69/340/378	2.96986
Single	Large White	PC aa C40:5	6	ALGA0114328	27231744	G	A	0.05	0.405153	0.0772109	1.98829e-07	-	2/75/710	2.66227
Ratio	Large White	PC aa C38:4 / PC aa C38:5	6	ALGA0114328	27231744	G	A	0.05	0.00579766	0.000694747	3.20656e-16	9.7884e+11	2/75/710	5.32793
Ratio	Large White	PC aa C36:4 / lysoPC a C18:0	6	ALGA0114328	27231744	G	A	0.05	-0.387418	0.0438597	6.6096e-18	349660297041	2/75/710	5.29607
Ratio	Large White	PC aa C36:2 / PC aa C36:3	6	ALGA0114328	27231744	G	A	0.05	0.0230271	0.00280874	9.93954e-16	183721324009	2/75/710	4.02441
Ratio	Large White	PC aa C34:2 / PC aa C36:2	6	ALGA0114328	27231744	G	A	0.05	-0.122052	0.0149946	1.55483e-15	117447082741	2/75/710	8.25754
Ratio	Large White	PC aa C34:1 / PC aa C36:1	6	ALGA0114328	27231744	G	A	0.05	-0.426421	0.0506653	1.83718e-16	8.9215e+10	2/75/710	5.12672
Ratio	Large White	lysoPC a C16:0 / lysoPC a C18:0	6	ALGA0114328	27231744	G	A	0.05	-0.291585	0.0338412	3.78955e-17	6.09865e+10	2/75/710	5.77172
Ratio	Large White	PC aa C36:1 / PC aa C36:4	6	ALGA0114328	27231744	G	A	0.05	0.375597	0.0446389	1.87081e-16	2.18754e+10	2/75/710	5.85812
Ratio	Large White	PC aa C38:5 / PC aa C40:5	6	ALGA0114328	27231744	G	A	0.05	-0.315452	0.0359177	9.95629e-18	1.99702e+10	2/75/710	5.08651
Ratio	Large White	PC aa C36:4 / PC aa C38:4	6	ALGA0114328	27231744	G	A	0.05	-0.056892	0.00685353	4.50576e-16	9.08277e+09	2/75/710	6.2315
Ratio	Large White	PC aa C36:4 / PC aa C40:5	6	ALGA0114328	27231744	G	A	0.05	-0.687912	0.0793001	2.37377e-17	8.37608e+09	2/75/710	8.05094
Ratio	Large White	PC aa C38:5 / lysoPC a C18:0	6	ALGA0114328	27231744	G	A	0.05	-0.181122	0.0225971	3.98764e-15	5.7957e+08	2/75/710	5.27426
Ratio	Large White	PC aa C36:2 / PC aa C36:4	6	ALGA0114328	27231744	G	A	0.05	0.0265526	0.00336024	9.30284e-15	4.39918e+08	2/75/710	8.72737
Ratio	Large White	PC aa C34:3 / PC aa C36:2	6	ALGA0114328	27231744	G	A	0.05	-0.00682635	0.000943916	1.1346e-12	1.60947e+08	2/75/710	8.25337
Ratio	Large White	PC aa C36:2 / PC aa C36:5	6	ALGA0114328	27231744	G	A	0.05	0.0077494	0.00110305	4.64175e-12	3.93409e+07	2/75/710	8.12932
Ratio	Large White	PC aa C38:6 / PC aa C40:6	6	ALGA0114328	27231744	G	A	0.05	-0.145714	0.021895	5.31985e-11	3.18599e+07	2/75/710	6.43356
Ratio	Large White	PC aa C36:1 / PC aa C38:5	6	ALGA0114328	27231744	G	A	0.05	0.0946128	0.0128812	5.17146e-13	3.1694e+07	2/75/710	5.40822
Ratio	Large White	PC aa C34:1 / PC aa C36:2	6	ALGA0114328	27231744	G	A	0.05	-0.0980712	0.0142706	1.29008e-11	1.4155e+07	2/75/710	8.62015
Ratio	Large White	PC aa C38:4 / PC aa C38:6	6	ALGA0114328	27231744	G	A	0.05	0.028749	0.0044268	1.48134e-10	1.14417e+07	2/75/710	4.95115
Ratio	Large White	PC aa C36:1 / PC aa C36:5	6	ALGA0114328	27231744	G	A	0.05	0.00580833	0.000807032	1.44196e-12	1.13668e+07	2/75/710	5.52674
Ratio	Large White	PC aa C36:2 / PC aa C38:5	6	ALGA0114328	27231744	G	A	0.05	0.030335	0.00447071	2.2863e-11	7.98717e+06	2/75/710	7.76505
Ratio	Large White	PC aa C36:1 / PC aa C36:3	6	ALGA0114328	27231744	G	A	0.05	0.152602	0.0215629	3.2736e-12	5.00685e+06	2/75/710	7.86841
Ratio	Large White	PC aa C34:2 / PC aa C36:1	6	ALGA0114328	27231744	G	A	0.05	-0.335911	0.0480009	5.58046e-12	2.93711e+06	2/75/710	5.54954
Ratio	Large White	PC aa C34:4 / PC aa C36:2	6	ALGA0114328	27231744	G	A	0.05	-0.00532965	0.000805127	6.68087e-11	2.73334e+06	2/75/710	4.74721
Ratio	Large White	PC aa C38:6 / PC aa C42:5	6	ALGA0114328	27231744	G	A	0.05	-0.283273	0.0452311	6.23188e-10	2.71972e+06	2/75/710	8.92623
Ratio	Large White	PC aa C36:5 / PC aa C38:4	6	ALGA0114328	27231744	G	A	0.05	-0.0601261	0.00943684	3.19336e-10	2.06877e+06	2/75/710	5.74802
Ratio	Large White	PC aa C34:4 / PC aa C36:1	6	ALGA0114328	27231744	G	A	0.05	-0.00404628	0.000584056	8.91906e-12	1.83769e+06	2/75/710	6.17538
Ratio	Large White	PC ae C36:2 / PC ae C38:2	6	ALGA0114328	27231744	G	A	0.05	-0.208145	0.0386374	9.47626e-08	1.62155e+06	2/75/710	6.25933
Ratio	Large White	PC aa C36:2 / PC ae C36:2	6	ALGA0114328	27231744	G	A	0.05	0.0307585	0.00471662	1.24915e-10	1.46188e+06	2/75/710	7.54718
Ratio	Large White	PC aa C36:5 / lysoPC a C18:0	6	ALGA0114328	27231744	G	A	0.05	-0.0603804	0.00846918	2.29298e-12	1.00791e+06	2/75/710	5.40175
Ratio	Large White	PC aa C32:0 / PC aa C36:2	6	ALGA0114328	27231744	G	A	0.05	-0.122325	0.019105	2.62866e-10	694691	2/75/710	4.90519
Ratio	Large White	PC aa C32:1 / PC aa C36:1	6	ALGA0114328	27231744	G	A	0.05	-0.0258777	0.00385779	3.78301e-11	433264	2/75/710	5.90134
Ratio	Large White	PC aa C36:1 / PC ae C36:1	6	ALGA0114328	27231744	G	A	0.05	0.0310557	0.00463263	3.88847e-11	421513	2/75/710	5.98326
Ratio	Large White	PC aa C40:5 / PC ae C40:5	6	ALGA0114328	27231744	G	A	0.05	0.102798	0.0139743	4.78246e-13	415746	2/75/710	6.26287
Ratio	Large White	PC aa C38:6 / lysoPC a C18:0	6	ALGA0114328	27231744	G	A	0.05	-0.11664	0.0167996	8.06323e-12	286624	2/75/710	9.01987
Ratio	Large White	PC aa C34:3 / PC aa C36:1	6	ALGA0114328	27231744	G	A	0.05	-0.0358436	0.00540296	6.09011e-11	269132	2/75/710	5.6613
Ratio	Large White	PC aa C40:5 / PC ae C38:4	6	ALGA0114328	27231744	G	A	0.05	0.125448	0.0172168	7.78468e-13	255410	2/75/710	3.55642
Ratio	Large White	PC aa C36:5 / PC aa C40:5	6	ALGA0114328	27231744	G	A	0.05	-0.0444938	0.00613595	9.92312e-13	200369	2/75/710	6.06672
Ratio	Large White	PC aa C34:4 / PC aa C40:5	6	ALGA0114328	27231744	G	A	0.05	-0.0205696	0.00283752	1.00743e-12	197362	2/75/710	6.31964
Ratio	Large White	PC aa C36:4 / SM C16:0	6	ALGA0114328	27231744	G	A	0.05	-0.141268	0.0207744	2.07503e-11	197225	2/75/710	7.35086
Ratio	Large White	PC aa C34:4 / PC aa C38:4	6	ALGA0114328	27231744	G	A	0.05	-0.318664	0.0554722	1.31899e-08	175777	2/75/710	6.41528
Single	Large White	PC aa C36:4	6	MARC0086608	27409149	A	G	0.064	-2.54791	0.483441	1.76201e-07	-	8/84/695	2.56411
Single	Large White	PC aa C38:6	6	MARC0086608	27409149	A	G	0.064	-0.326056	0.0681153	2.02582e-06	-	8/84/695	2.82915
Ratio	Large White	PC aa C38:5 / PC aa C40:5	6	MARC0086608	27409149	A	G	0.064	-0.295795	0.0308011	1.01582e-20	381407390855000	8/84/695	4.55383
Ratio	Large White	PC aa C34:1 / PC aa C36:1	6	MARC0086608	27409149	A	G	0.064	-0.359505	0.0439487	1.14303e-15	925156141599	8/84/695	4.86276
Ratio	Large White	lysoPC a C16:0 / lysoPC a C18:0	6	MARC0086608	27409149	A	G	0.064	-0.249374	0.0293299	9.35209e-17	8.87308e+11	8/84/695	6.91934
Ratio	Large White	PC aa C36:2 / PC aa C36:3	6	MARC0086608	27409149	A	G	0.064	0.0190991	0.00243259	1.35408e-14	214957029834	8/84/695	5.83089
Ratio	Large White	PC aa C36:4 / PC aa C40:5	6	MARC0086608	27409149	A	G	0.064	-0.615642	0.0684757	1.81885e-18	9.68749e+10	8/84/695	5.28805
Ratio	Large White	PC aa C34:2 / PC aa C36:2	6	MARC0086608	27409149	A	G	0.064	-0.100003	0.013018	4.68547e-14	1.59245e+10	8/84/695	4.12205
Ratio	Large White	PC aa C38:4 / PC aa C38:5	6	MARC0086608	27409149	A	G	0.064	0.00497966	0.000601628	5.42986e-16	7.1354e+09	8/84/695	4.68893
Ratio	Large White	PC aa C38:6 / PC aa C40:5	6	MARC0086608	27409149	A	G	0.064	-0.13218	0.0159449	4.91849e-16	4.11879e+09	8/84/695	7.10288
Ratio	Large White	PC aa C34:1 / PC aa C36:2	6	MARC0086608	27409149	A	G	0.064	-0.0858918	0.0123388	7.14514e-12	6.78112e+08	8/84/695	8.00408
Ratio	Large White	PC aa C36:1 / PC aa C36:4	6	MARC0086608	27409149	A	G	0.064	0.320334	0.0387119	5.52106e-16	3.19143e+08	8/84/695	6.60663
Ratio	Large White	PC aa C36:2 / PC aa C36:4	6	MARC0086608	27409149	A	G	0.064	0.0238003	0.00290672	1.0758e-15	1.63787e+08	8/84/695	4.05184
Ratio	Large White	PC aa C36:1 / PC aa C38:5	6	MARC0086608	27409149	A	G	0.064	0.0858002	0.0111088	3.45898e-14	1.1201e+08	8/84/695	4.80836
Ratio	Large White	PC aa C36:4 / lysoPC a C18:0	6	MARC0086608	27409149	A	G	0.064	-0.309322	0.0380842	1.77896e-15	9.90472e+07	8/84/695	6.41541
Ratio	Large White	PC aa C38:5 / lysoPC a C18:0	6	MARC0086608	27409149	A	G	0.064	-0.149278	0.0195262	6.1219e-14	6.3288e+07	8/84/695	5.89117
Ratio	Large White	PC aa C34:3 / PC aa C36:2	6	MARC0086608	27409149	A	G	0.064	-0.0057074	0.000817594	6.2671e-12	6.10513e+07	8/84/695	6.12789
Ratio	Large White	PC aa C38:4 / PC aa C38:6	6	MARC0086608	27409149	A	G	0.064	0.0290582	0.00379908	5.95829e-14	3.40001e+07	8/84/695	9.31425
Ratio	Large White	PC aa C36:2 / PC aa C38:5	6	MARC0086608	27409149	A	G	0.064	0.028557	0.00384625	2.95583e-13	1.31077e+07	8/84/695	4.82001
Ratio	Large White	PC aa C38:6 / lysoPC a C18:0	6	MARC0086608	27409149	A	G	0.064	-0.107915	0.0144631	2.27929e-13	8.88794e+06	8/84/695	6.13819
Ratio	Large White	PC aa C36:1 / PC aa C36:3	6	MARC0086608	27409149	A	G	0.064	0.121953	0.0186819	1.1986e-10	8.8227e+06	8/84/695	5.73258
Ratio	Large White	PC aa C36:4 / PC aa C38:4	6	MARC0086608	27409149	A	G	0.064	-0.0462581	0.00596328	2.7068e-14	6.50958e+06	8/84/695	7.83614
Ratio	Large White	PC aa C36:1 / PC aa C38:6	6	MARC0086608	27409149	A	G	0.064	0.0677871	0.0092289	5.16863e-13	3.91946e+06	8/84/695	8.03073
Ratio	Large White	PC aa C36:5 / PC aa C40:5	6	MARC0086608	27409149	A	G	0.064	-0.0380955	0.0053102	1.69017e-12	3.66257e+06	8/84/695	3.04254
Ratio	Large White	PC aa C36:2 / PC aa C38:6	6	MARC0086608	27409149	A	G	0.064	0.0900622	0.0122878	5.76846e-13	3.5119e+06	8/84/695	4.36889
Ratio	Large White	PC aa C40:5 / PC ae C38:4	6	MARC0086608	27409149	A	G	0.064	0.106833	0.014905	1.76605e-12	3.5052e+06	8/84/695	4.20078
Ratio	Large White	lysoPC a C18:0 / lysoPC a C18:1	6	MARC0086608	27409149	A	G	0.064	0.148951	0.0235943	4.57978e-10	3.1996e+06	8/84/695	7.73392
Ratio	Large White	PC aa C36:2 / PC aa C36:5	6	MARC0086608	27409149	A	G	0.064	0.00641734	0.00095533	3.5574e-11	2.68958e+06	8/84/695	7.26376
Ratio	Large White	PC aa C36:1 / PC aa C36:5	6	MARC0086608	27409149	A	G	0.064	0.00469053	0.000700899	4.18942e-11	2.28382e+06	8/84/695	8.00792
Ratio	Large White	PC aa C36:1 / lysoPC a C18:1	6	MARC0086608	27409149	A	G	0.064	0.120714	0.0191457	4.81114e-10	2.19799e+06	8/84/695	8.41279
Ratio	Large White	PC aa C34:2 / PC aa C36:1	6	MARC0086608	27409149	A	G	0.064	-0.264211	0.0416579	3.82178e-10	1.95233e+06	8/84/695	3.93864
Ratio	Large White	lysoPC a C16:1 / lysoPC a C18:0	6	MARC0086608	27409149	A	G	0.064	-0.047332	0.0076068	7.97401e-10	1.83766e+06	8/84/695	7.85013
Ratio	Large White	PC aa C40:5 / PC ae C40:5	6	MARC0086608	27409149	A	G	0.064	0.0851894	0.0121089	4.3433e-12	1.42527e+06	8/84/695	4.814
Ratio	Large White	PC aa C36:2 / lysoPC a C16:0	6	MARC0086608	27409149	A	G	0.064	0.0714068	0.0107723	6.30093e-11	1.31698e+06	8/84/695	4.20775
Ratio	Large White	PC aa C40:5 / lysoPC a C16:0	6	MARC0086608	27409149	A	G	0.064	0.261207	0.0372145	4.84759e-12	1.277e+06	8/84/695	4.52177
Ratio	Large White	PC aa C34:1 / PC aa C40:5	6	MARC0086608	27409149	A	G	0.064	-0.288828	0.0412867	5.66969e-12	1.09184e+06	8/84/695	3.9787
Ratio	Large White	PC aa C36:1 / PC ae C38:0	6	MARC0086608	27409149	A	G	0.064	0.0507883	0.00831906	1.61646e-09	654197	8/84/695	5.4227
Ratio	Large White	PC aa C40:5 / PC ae C38:0	6	MARC0086608	27409149	A	G	0.064	0.0904123	0.0130691	9.52522e-12	649894	8/84/695	6.54596
Ratio	Large White	PC aa C34:4 / PC aa C36:2	6	MARC0086608	27409149	A	G	0.064	-0.00407166	0.000699982	8.73807e-09	554494	8/84/695	5.8001
Ratio	Large White	PC aa C36:2 / PC ae C36:2	6	MARC0086608	27409149	A	G	0.064	0.0235615	0.00408703	1.17492e-08	412386	8/84/695	5.8544
Ratio	Large White	PC aa C36:2 / PC ae C38:0	6	MARC0086608	27409149	A	G	0.064	0.100549	0.0171162	6.26851e-09	344801	8/84/695	5.91694
Ratio	Large White	PC aa C32:1 / PC aa C36:1	6	MARC0086608	27409149	A	G	0.064	-0.0200809	0.00334896	3.08327e-09	342975	8/84/695	6.38974
Ratio	Large White	PC aa C36:2 / lysoPC a C18:1	6	MARC0086608	27409149	A	G	0.064	0.147322	0.0257984	1.59933e-08	302952	8/84/695	6.91303
Ratio	Large White	PC aa C34:3 / PC aa C36:1	6	MARC0086608	27409149	A	G	0.064	-0.0286891	0.00468188	1.41166e-09	271039	8/84/695	6.97528
Ratio	Large White	PC aa C32:2 / PC aa C36:2	6	MARC0086608	27409149	A	G	0.064	-0.00714682	0.00125813	1.89361e-08	255872	8/84/695	10.4894
Ratio	Large White	PC ae C38:0 / lysoPC a C18:0	6	MARC0086608	27409149	A	G	0.064	-0.0947533	0.0161156	6.08687e-09	240739	8/84/695	5.13647
Ratio	Large White	PC aa C36:5 / lysoPC a C18:0	6	MARC0086608	27409149	A	G	0.064	-0.0462644	0.00733319	4.69779e-10	203668	8/84/695	5.38419
Ratio	Large White	PC ae C36:2 / PC ae C38:2	6	MARC0086608	27409149	A	G	0.064	-0.166287	0.0334613	8.24712e-07	153984	8/84/695	7.04586
Single	Large White	PC aa C40:5	6	MARC0091858	27626041	G	A	0.055	0.388845	0.0727287	1.17739e-07	-	2/83/702	2.75413
Single	Large White	PC aa C36:1	6	MARC0091858	27626041	G	A	0.055	0.504945	0.103365	1.25403e-06	-	2/83/702	2.11945
Ratio	Large White	PC aa C38:4 / PC aa C38:5	6	MARC0091858	27626041	G	A	0.055	0.00602254	0.000647433	1.34534e-19	1229741291200000	2/83/702	5.88491
Ratio	Large White	lysoPC a C16:0 / lysoPC a C18:0	6	MARC0091858	27626041	G	A	0.055	-0.286679	0.0316991	1.17281e-18	34534070823200	2/83/702	7.4508
Ratio	Large White	PC aa C34:2 / PC aa C36:2	6	MARC0091858	27626041	G	A	0.055	-0.122379	0.0140748	2.02098e-17	8003822901590	2/83/702	7.07958
Ratio	Large White	PC aa C36:2 / PC aa C36:3	6	MARC0091858	27626041	G	A	0.055	0.0227965	0.00263623	2.95592e-17	5472259379320	2/83/702	4.08219
Ratio	Large White	PC aa C36:4 / PC aa C38:4	6	MARC0091858	27626041	G	A	0.055	-0.0579774	0.00640034	1.03787e-18	2677380316920	2/83/702	4.99357
Ratio	Large White	PC aa C38:5 / PC aa C40:5	6	MARC0091858	27626041	G	A	0.055	-0.303436	0.0337258	1.72419e-18	6.82867e+10	2/83/702	5.61545
Ratio	Large White	PC aa C36:1 / PC aa C36:4	6	MARC0091858	27626041	G	A	0.055	0.363956	0.0418426	1.96699e-17	6.37536e+10	2/83/702	4.97602
Ratio	Large White	PC aa C36:4 / PC aa C40:5	6	MARC0091858	27626041	G	A	0.055	-0.664515	0.0742361	2.51346e-18	4.68435e+10	2/83/702	9.44199
Ratio	Large White	PC aa C34:1 / PC aa C36:1	6	MARC0091858	27626041	G	A	0.055	-0.409422	0.0475726	4.10456e-17	3.05521e+10	2/83/702	6.65097
Ratio	Large White	PC aa C38:6 / PC aa C40:6	6	MARC0091858	27626041	G	A	0.055	-0.153008	0.0204334	1.88474e-13	25840957711	2/83/702	6.25979
Ratio	Large White	PC aa C36:2 / lysoPC a C16:0	6	MARC0091858	27626041	G	A	0.055	0.0921929	0.0115823	6.04511e-15	6.69992e+09	2/83/702	5.82898
Ratio	Large White	PC aa C36:3 / PC ae C38:2	6	MARC0091858	27626041	G	A	0.055	-0.332929	0.0480095	8.52691e-12	1.13107e+09	2/83/702	7.52151
Ratio	Large White	PC aa C34:2 / PC ae C38:2	6	MARC0091858	27626041	G	A	0.055	-1.7694	0.24866	2.51674e-12	9.02053e+08	2/83/702	5.25052
Ratio	Large White	PC aa C36:2 / PC aa C36:4	6	MARC0091858	27626041	G	A	0.055	0.0252576	0.00315698	4.45487e-15	6.23758e+08	2/83/702	8.60184
Ratio	Large White	PC aa C36:2 / PC aa C36:5	6	MARC0091858	27626041	G	A	0.055	0.00770636	0.00103854	3.04576e-13	5.31084e+08	2/83/702	5.75858
Ratio	Large White	PC aa C38:6 / PC aa C42:5	6	MARC0091858	27626041	G	A	0.055	-0.297632	0.0424023	4.83831e-12	3.4466e+08	2/83/702	9.41417
Ratio	Large White	PC aa C36:5 / PC aa C38:4	6	MARC0091858	27626041	G	A	0.055	-0.0650285	0.00885021	5.07599e-13	3.25929e+08	2/83/702	8.77042
Ratio	Large White	PC aa C36:1 / PC aa C36:5	6	MARC0091858	27626041	G	A	0.055	0.00598737	0.00075547	7.81732e-15	1.60417e+08	2/83/702	4.68846
Ratio	Large White	PC aa C36:1 / lysoPC a C16:0	6	MARC0091858	27626041	G	A	0.055	0.214021	0.0270681	8.97818e-15	1.39675e+08	2/83/702	9.24053
Ratio	Large White	PC aa C36:1 / PC aa C36:3	6	MARC0091858	27626041	G	A	0.055	0.158519	0.0202007	1.39613e-14	8.9822e+07	2/83/702	7.62515
Ratio	Large White	PC aa C38:5 / PC aa C42:5	6	MARC0091858	27626041	G	A	0.055	-1.80877	0.25576	3.38488e-12	7.40033e+07	2/83/702	4.56004
Ratio	Large White	PC aa C38:4 / lysoPC a C16:0	6	MARC0091858	27626041	G	A	0.055	0.167888	0.0229032	5.73035e-13	7.06794e+07	2/83/702	5.98657
Ratio	Large White	PC aa C36:4 / PC aa C42:5	6	MARC0091858	27626041	G	A	0.055	-3.79205	0.494304	5.05298e-14	5.49925e+07	2/83/702	6.39129
Ratio	Large White	PC aa C36:2 / PC aa C38:5	6	MARC0091858	27626041	G	A	0.055	0.0297389	0.0042009	3.22765e-12	5.01155e+07	2/83/702	6.26167
Ratio	Large White	PC aa C34:2 / PC aa C36:1	6	MARC0091858	27626041	G	A	0.055	-0.34844	0.044998	2.9921e-14	4.19114e+07	2/83/702	6.84658
Ratio	Large White	PC aa C40:5 / lysoPC a C16:0	6	MARC0091858	27626041	G	A	0.055	0.322973	0.0400712	2.84714e-15	4.13534e+07	2/83/702	4.95483
Ratio	Large White	PC aa C36:4 / PC aa C40:2	6	MARC0091858	27626041	G	A	0.055	-1.43113	0.18946	1.18045e-13	2.35399e+07	2/83/702	6.02315
Ratio	Large White	PC aa C38:5 / PC aa C40:2	6	MARC0091858	27626041	G	A	0.055	-0.229857	0.0335344	1.45205e-11	1.7251e+07	2/83/702	4.75514
Ratio	Large White	PC aa C38:4 / PC aa C38:6	6	MARC0091858	27626041	G	A	0.055	0.0283475	0.00414273	1.5679e-11	1.05518e+07	2/83/702	8.76423
Ratio	Large White	PC aa C36:1 / PC aa C38:5	6	MARC0091858	27626041	G	A	0.055	0.0908422	0.0121045	1.67411e-13	7.49074e+06	2/83/702	5.63349
Ratio	Large White	PC aa C36:4 / PC ae C32:1	6	MARC0091858	27626041	G	A	0.055	-4.69871	0.640665	5.58077e-13	4.97917e+06	2/83/702	7.3591
Ratio	Large White	PC aa C38:5 / PC aa C42:4	6	MARC0091858	27626041	G	A	0.055	-2.55271	0.386546	7.38886e-11	3.39014e+06	2/83/702	7.25666
Ratio	Large White	PC aa C36:4 / lysoPC a C18:0	6	MARC0091858	27626041	G	A	0.055	-0.304153	0.0419486	9.97398e-13	2.78601e+06	2/83/702	8.67711
Ratio	Large White	PC aa C36:4 / PC aa C42:4	6	MARC0091858	27626041	G	A	0.055	-9.32055	1.28569	1.00542e-12	2.76379e+06	2/83/702	9.90584
Ratio	Large White	PC aa C34:1 / PC aa C36:2	6	MARC0091858	27626041	G	A	0.055	-0.0888354	0.0134851	8.19463e-11	1.97392e+06	2/83/702	6.76008
Ratio	Large White	PC aa C36:5 / PC aa C40:5	6	MARC0091858	27626041	G	A	0.055	-0.0438185	0.00576146	8.14401e-14	1.44571e+06	2/83/702	4.50297
Ratio	Large White	PC aa C36:4 / PC ae C38:2	6	MARC0091858	27626041	G	A	0.055	-4.25377	0.595713	2.12408e-12	1.30822e+06	2/83/702	5.60968
Ratio	Large White	PC aa C38:5 / PC aa C40:4	6	MARC0091858	27626041	G	A	0.055	-0.31703	0.0492929	2.19632e-10	1.14051e+06	2/83/702	5.22612
Ratio	Large White	PC aa C36:4 / PC aa C42:1	6	MARC0091858	27626041	G	A	0.055	-1.28841	0.181412	2.76134e-12	1.00631e+06	2/83/702	6.39747
Ratio	Large White	PC aa C36:4 / PC ae C32:2	6	MARC0091858	27626041	G	A	0.055	-4.99271	0.705631	3.30787e-12	840045	2/83/702	7.39121
Ratio	Large White	PC aa C38:5 / lysoPC a C18:0	6	MARC0091858	27626041	G	A	0.055	-0.137804	0.0216219	3.15529e-10	793881	2/83/702	5.89162
Ratio	Large White	PC aa C38:5 / PC aa C42:1	6	MARC0091858	27626041	G	A	0.055	-0.704942	0.110838	3.42479e-10	731410	2/83/702	4.90802
Ratio	Large White	PC aa C34:3 / PC aa C36:2	6	MARC0091858	27626041	G	A	0.055	-0.00574129	0.000896341	2.588e-10	625022	2/83/702	5.71044
Ratio	Large White	PC aa C36:4 / PC aa C40:4	6	MARC0091858	27626041	G	A	0.055	-0.626883	0.0893632	4.97854e-12	558148	2/83/702	6.9577
Ratio	Large White	PC aa C36:5 / PC aa C42:5	6	MARC0091858	27626041	G	A	0.055	-0.205247	0.0327438	6.02615e-10	475160	2/83/702	6.41963
Ratio	Large White	PC aa C36:4 / PC ae C40:2	6	MARC0091858	27626041	G	A	0.055	-16.426	2.37926	1.04663e-11	265496	2/83/702	6.08465
Ratio	Large White	PC aa C34:2 / PC ae C32:1	6	MARC0091858	27626041	G	A	0.055	-0.938411	0.162147	1.03379e-08	219602	2/83/702	5.97542
Ratio	Large White	PC aa C36:5 / PC aa C40:2	6	MARC0091858	27626041	G	A	0.055	-0.113691	0.0185405	1.37509e-09	208233	2/83/702	6.67862
Ratio	Large White	PC aa C34:4 / PC aa C36:2	6	MARC0091858	27626041	G	A	0.055	-0.00473337	0.000760749	7.99003e-10	202447	2/83/702	9.32643
Ratio	Large White	PC aa C36:1 / lysoPC a C18:1	6	MARC0091858	27626041	G	A	0.055	0.145307	0.0208191	6.31821e-12	198479	2/83/702	5.98082
Ratio	Large White	PC aa C36:4 / PC aa C42:2	6	MARC0091858	27626041	G	A	0.055	-1.32908	0.194338	1.60687e-11	172930	2/83/702	6.53896
Ratio	Large White	PC aa C42:5 / lysoPC a C16:0	6	MARC0091858	27626041	G	A	0.055	0.673549	0.10492	2.3657e-10	171204	2/83/702	6.0449
Ratio	Large White	PC aa C36:5 / lysoPC a C18:0	6	MARC0091858	27626041	G	A	0.055	-0.0492475	0.0080843	1.75006e-09	160695	2/83/702	4.88867
Single	Large White	PC aa C40:5	6	MARC0032894	27632273	C	A	0.055	0.388845	0.0727287	1.17739e-07	-	2/83/702	2.75413
Single	Large White	PC aa C36:1	6	MARC0032894	27632273	C	A	0.055	0.504945	0.103365	1.25403e-06	-	2/83/702	2.11945
Ratio	Large White	PC aa C38:4 / PC aa C38:5	6	MARC0032894	27632273	C	A	0.055	0.00602254	0.000647433	1.34534e-19	1229741291200000	2/83/702	5.88491
Ratio	Large White	lysoPC a C16:0 / lysoPC a C18:0	6	MARC0032894	27632273	C	A	0.055	-0.286679	0.0316991	1.17281e-18	34534070823200	2/83/702	7.4508
Ratio	Large White	PC aa C34:2 / PC aa C36:2	6	MARC0032894	27632273	C	A	0.055	-0.122379	0.0140748	2.02098e-17	8003822901590	2/83/702	7.07958
Ratio	Large White	PC aa C36:2 / PC aa C36:3	6	MARC0032894	27632273	C	A	0.055	0.0227965	0.00263623	2.95592e-17	5472259379320	2/83/702	4.08219
Ratio	Large White	PC aa C36:4 / PC aa C38:4	6	MARC0032894	27632273	C	A	0.055	-0.0579774	0.00640034	1.03787e-18	2677380316920	2/83/702	4.99357
Ratio	Large White	PC aa C38:5 / PC aa C40:5	6	MARC0032894	27632273	C	A	0.055	-0.303436	0.0337258	1.72419e-18	6.82867e+10	2/83/702	5.61545
Ratio	Large White	PC aa C36:1 / PC aa C36:4	6	MARC0032894	27632273	C	A	0.055	0.363956	0.0418426	1.96699e-17	6.37536e+10	2/83/702	4.97602
Ratio	Large White	PC aa C36:4 / PC aa C40:5	6	MARC0032894	27632273	C	A	0.055	-0.664515	0.0742361	2.51346e-18	4.68435e+10	2/83/702	9.44199
Ratio	Large White	PC aa C34:1 / PC aa C36:1	6	MARC0032894	27632273	C	A	0.055	-0.409422	0.0475726	4.10456e-17	3.05521e+10	2/83/702	6.65097
Ratio	Large White	PC aa C38:6 / PC aa C40:6	6	MARC0032894	27632273	C	A	0.055	-0.153008	0.0204334	1.88474e-13	25840957711	2/83/702	6.25979
Ratio	Large White	PC aa C36:2 / lysoPC a C16:0	6	MARC0032894	27632273	C	A	0.055	0.0921929	0.0115823	6.04511e-15	6.69992e+09	2/83/702	5.82898
Ratio	Large White	PC aa C36:3 / PC ae C38:2	6	MARC0032894	27632273	C	A	0.055	-0.332929	0.0480095	8.52691e-12	1.13107e+09	2/83/702	7.52151
Ratio	Large White	PC aa C34:2 / PC ae C38:2	6	MARC0032894	27632273	C	A	0.055	-1.7694	0.24866	2.51674e-12	9.02053e+08	2/83/702	5.25052
Ratio	Large White	PC aa C36:2 / PC aa C36:4	6	MARC0032894	27632273	C	A	0.055	0.0252576	0.00315698	4.45487e-15	6.23758e+08	2/83/702	8.60184
Ratio	Large White	PC aa C36:2 / PC aa C36:5	6	MARC0032894	27632273	C	A	0.055	0.00770636	0.00103854	3.04576e-13	5.31084e+08	2/83/702	5.75858
Ratio	Large White	PC aa C38:6 / PC aa C42:5	6	MARC0032894	27632273	C	A	0.055	-0.297632	0.0424023	4.83831e-12	3.4466e+08	2/83/702	9.41417
Ratio	Large White	PC aa C36:5 / PC aa C38:4	6	MARC0032894	27632273	C	A	0.055	-0.0650285	0.00885021	5.07599e-13	3.25929e+08	2/83/702	8.77042
Ratio	Large White	PC aa C36:1 / PC aa C36:5	6	MARC0032894	27632273	C	A	0.055	0.00598737	0.00075547	7.81732e-15	1.60417e+08	2/83/702	4.68846
Ratio	Large White	PC aa C36:1 / lysoPC a C16:0	6	MARC0032894	27632273	C	A	0.055	0.214021	0.0270681	8.97818e-15	1.39675e+08	2/83/702	9.24053
Ratio	Large White	PC aa C36:1 / PC aa C36:3	6	MARC0032894	27632273	C	A	0.055	0.158519	0.0202007	1.39613e-14	8.9822e+07	2/83/702	7.62515
Ratio	Large White	PC aa C38:5 / PC aa C42:5	6	MARC0032894	27632273	C	A	0.055	-1.80877	0.25576	3.38488e-12	7.40033e+07	2/83/702	4.56004
Ratio	Large White	PC aa C38:4 / lysoPC a C16:0	6	MARC0032894	27632273	C	A	0.055	0.167888	0.0229032	5.73035e-13	7.06794e+07	2/83/702	5.98657
Ratio	Large White	PC aa C36:4 / PC aa C42:5	6	MARC0032894	27632273	C	A	0.055	-3.79205	0.494304	5.05298e-14	5.49925e+07	2/83/702	6.39129
Ratio	Large White	PC aa C36:2 / PC aa C38:5	6	MARC0032894	27632273	C	A	0.055	0.0297389	0.0042009	3.22765e-12	5.01155e+07	2/83/702	6.26167
Ratio	Large White	PC aa C34:2 / PC aa C36:1	6	MARC0032894	27632273	C	A	0.055	-0.34844	0.044998	2.9921e-14	4.19114e+07	2/83/702	6.84658
Ratio	Large White	PC aa C40:5 / lysoPC a C16:0	6	MARC0032894	27632273	C	A	0.055	0.322973	0.0400712	2.84714e-15	4.13534e+07	2/83/702	4.95483
Ratio	Large White	PC aa C36:4 / PC aa C40:2	6	MARC0032894	27632273	C	A	0.055	-1.43113	0.18946	1.18045e-13	2.35399e+07	2/83/702	6.02315
Ratio	Large White	PC aa C38:5 / PC aa C40:2	6	MARC0032894	27632273	C	A	0.055	-0.229857	0.0335344	1.45205e-11	1.7251e+07	2/83/702	4.75514
Ratio	Large White	PC aa C38:4 / PC aa C38:6	6	MARC0032894	27632273	C	A	0.055	0.0283475	0.00414273	1.5679e-11	1.05518e+07	2/83/702	8.76423
Ratio	Large White	PC aa C36:1 / PC aa C38:5	6	MARC0032894	27632273	C	A	0.055	0.0908422	0.0121045	1.67411e-13	7.49074e+06	2/83/702	5.63349
Ratio	Large White	PC aa C36:4 / PC ae C32:1	6	MARC0032894	27632273	C	A	0.055	-4.69871	0.640665	5.58077e-13	4.97917e+06	2/83/702	7.3591
Ratio	Large White	PC aa C38:5 / PC aa C42:4	6	MARC0032894	27632273	C	A	0.055	-2.55271	0.386546	7.38886e-11	3.39014e+06	2/83/702	7.25666
Ratio	Large White	PC aa C36:4 / lysoPC a C18:0	6	MARC0032894	27632273	C	A	0.055	-0.304153	0.0419486	9.97398e-13	2.78601e+06	2/83/702	8.67711
Ratio	Large White	PC aa C36:4 / PC aa C42:4	6	MARC0032894	27632273	C	A	0.055	-9.32055	1.28569	1.00542e-12	2.76379e+06	2/83/702	9.90584
Ratio	Large White	PC aa C34:1 / PC aa C36:2	6	MARC0032894	27632273	C	A	0.055	-0.0888354	0.0134851	8.19463e-11	1.97392e+06	2/83/702	6.76008
Ratio	Large White	PC aa C36:5 / PC aa C40:5	6	MARC0032894	27632273	C	A	0.055	-0.0438185	0.00576146	8.14401e-14	1.44571e+06	2/83/702	4.50297
Ratio	Large White	PC aa C36:4 / PC ae C38:2	6	MARC0032894	27632273	C	A	0.055	-4.25377	0.595713	2.12408e-12	1.30822e+06	2/83/702	5.60968
Ratio	Large White	PC aa C38:5 / PC aa C40:4	6	MARC0032894	27632273	C	A	0.055	-0.31703	0.0492929	2.19632e-10	1.14051e+06	2/83/702	5.22612
Ratio	Large White	PC aa C36:4 / PC aa C42:1	6	MARC0032894	27632273	C	A	0.055	-1.28841	0.181412	2.76134e-12	1.00631e+06	2/83/702	6.39747
Ratio	Large White	PC aa C36:4 / PC ae C32:2	6	MARC0032894	27632273	C	A	0.055	-4.99271	0.705631	3.30787e-12	840045	2/83/702	7.39121
Ratio	Large White	PC aa C38:5 / lysoPC a C18:0	6	MARC0032894	27632273	C	A	0.055	-0.137804	0.0216219	3.15529e-10	793881	2/83/702	5.89162
Ratio	Large White	PC aa C38:5 / PC aa C42:1	6	MARC0032894	27632273	C	A	0.055	-0.704942	0.110838	3.42479e-10	731410	2/83/702	4.90802
Ratio	Large White	PC aa C34:3 / PC aa C36:2	6	MARC0032894	27632273	C	A	0.055	-0.00574129	0.000896341	2.588e-10	625022	2/83/702	5.71044
Ratio	Large White	PC aa C36:4 / PC aa C40:4	6	MARC0032894	27632273	C	A	0.055	-0.626883	0.0893632	4.97854e-12	558148	2/83/702	6.9577
Ratio	Large White	PC aa C36:5 / PC aa C42:5	6	MARC0032894	27632273	C	A	0.055	-0.205247	0.0327438	6.02615e-10	475160	2/83/702	6.41963
Ratio	Large White	PC aa C36:4 / PC ae C40:2	6	MARC0032894	27632273	C	A	0.055	-16.426	2.37926	1.04663e-11	265496	2/83/702	6.08465
Ratio	Large White	PC aa C34:2 / PC ae C32:1	6	MARC0032894	27632273	C	A	0.055	-0.938411	0.162147	1.03379e-08	219602	2/83/702	5.97542
Ratio	Large White	PC aa C36:5 / PC aa C40:2	6	MARC0032894	27632273	C	A	0.055	-0.113691	0.0185405	1.37509e-09	208233	2/83/702	6.67862
Ratio	Large White	PC aa C34:4 / PC aa C36:2	6	MARC0032894	27632273	C	A	0.055	-0.00473337	0.000760749	7.99003e-10	202447	2/83/702	9.32643
Ratio	Large White	PC aa C36:1 / lysoPC a C18:1	6	MARC0032894	27632273	C	A	0.055	0.145307	0.0208191	6.31821e-12	198479	2/83/702	5.98082
Ratio	Large White	PC aa C36:4 / PC aa C42:2	6	MARC0032894	27632273	C	A	0.055	-1.32908	0.194338	1.60687e-11	172930	2/83/702	6.53896
Ratio	Large White	PC aa C42:5 / lysoPC a C16:0	6	MARC0032894	27632273	C	A	0.055	0.673549	0.10492	2.3657e-10	171204	2/83/702	6.0449
Ratio	Large White	PC aa C36:5 / lysoPC a C18:0	6	MARC0032894	27632273	C	A	0.055	-0.0492475	0.0080843	1.75006e-09	160695	2/83/702	4.88867
Single	Large White	PC aa C40:5	6	MARC0055666	27899607	G	A	0.065	0.439177	0.0673805	1.27669e-10	-	2/99/686	2.42224
Single	Large White	PC aa C36:1	6	MARC0055666	27899607	G	A	0.065	0.550918	0.0961188	1.41932e-08	-	2/99/686	5.12158
Ratio	Large White	PC aa C38:4 / PC aa C38:5	6	MARC0055666	27899607	G	A	0.065	0.00521648	0.000609295	5.85845e-17	2525776002640	2/99/686	8.0882
Ratio	Large White	lysoPC a C16:0 / lysoPC a C18:0	6	MARC0055666	27899607	G	A	0.065	-0.26184	0.0296522	6.75919e-18	889888548743	2/99/686	4.54879
Ratio	Large White	PC aa C36:1 / PC aa C36:4	6	MARC0055666	27899607	G	A	0.065	0.367324	0.0387432	2.92445e-20	485327653399	2/99/686	6.21777
Ratio	Large White	PC aa C34:2 / PC aa C36:2	6	MARC0055666	27899607	G	A	0.065	-0.111985	0.0131606	8.86949e-17	4.29416e+11	2/99/686	5.49923
Ratio	Large White	PC aa C38:5 / PC aa C40:5	6	MARC0055666	27899607	G	A	0.065	-0.310863	0.0311385	3.57287e-22	357327582588	2/99/686	4.501
Ratio	Large White	PC aa C36:2 / PC aa C36:3	6	MARC0055666	27899607	G	A	0.065	0.0208365	0.00246519	1.38711e-16	2.74578e+11	2/99/686	7.90443
Ratio	Large White	PC aa C36:4 / PC aa C38:4	6	MARC0055666	27899607	G	A	0.065	-0.0501044	0.00602072	3.83315e-16	2.93846e+10	2/99/686	8.81256
Ratio	Large White	PC aa C38:6 / PC aa C40:6	6	MARC0055666	27899607	G	A	0.065	-0.145937	0.0190517	5.49049e-14	5.30882e+09	2/99/686	5.19401
Ratio	Large White	PC aa C38:4 / PC aa C38:6	6	MARC0055666	27899607	G	A	0.065	0.0295842	0.0038393	3.94349e-14	3.7523e+09	2/99/686	5.75351
Ratio	Large White	PC aa C36:2 / lysoPC a C16:0	6	MARC0055666	27899607	G	A	0.065	0.0840977	0.010839	2.67459e-14	1.42403e+09	2/99/686	5.34404
Ratio	Large White	PC aa C36:2 / PC aa C36:4	6	MARC0055666	27899607	G	A	0.065	0.0233622	0.00295084	8.31126e-15	1.35522e+09	2/99/686	8.17706
Ratio	Large White	PC aa C36:4 / PC aa C40:5	6	MARC0055666	27899607	G	A	0.065	-0.64311	0.0690329	1.19672e-19	1.06682e+09	2/99/686	5.76206
Ratio	Large White	PC aa C38:6 / PC aa C42:5	6	MARC0055666	27899607	G	A	0.065	-0.292279	0.0394568	3.3333e-13	8.74449e+08	2/99/686	3.79527
Ratio	Large White	PC aa C34:1 / PC aa C36:1	6	MARC0055666	27899607	G	A	0.065	-0.386937	0.0443679	1.63635e-17	8.67367e+08	2/99/686	7.10566
Ratio	Large White	PC aa C36:3 / PC ae C38:2	6	MARC0055666	27899607	G	A	0.065	-0.309615	0.0447365	9.34621e-12	7.15371e+08	2/99/686	5.34438
Ratio	Large White	PC aa C36:1 / PC aa C38:5	6	MARC0055666	27899607	G	A	0.065	0.0968892	0.0111779	2.50718e-17	5.66101e+08	2/99/686	7.01538
Ratio	Large White	PC aa C34:2 / PC ae C38:2	6	MARC0055666	27899607	G	A	0.065	-1.60432	0.232339	1.03795e-11	4.91052e+08	2/99/686	6.58645
Ratio	Large White	PC aa C36:2 / PC aa C38:5	6	MARC0055666	27899607	G	A	0.065	0.0287081	0.00391785	5.84405e-13	6.51722e+07	2/99/686	4.94749
Ratio	Large White	PC aa C36:1 / PC aa C36:5	6	MARC0055666	27899607	G	A	0.065	0.00585973	0.000702471	3.29239e-16	4.31089e+07	2/99/686	7.24455
Ratio	Large White	PC aa C36:1 / lysoPC a C16:0	6	MARC0055666	27899607	G	A	0.065	0.209633	0.0251673	3.61414e-16	3.92711e+07	2/99/686	6.00065
Ratio	Large White	PC aa C36:1 / PC aa C36:3	6	MARC0055666	27899607	G	A	0.065	0.155996	0.018765	4.10521e-16	3.45735e+07	2/99/686	9.93235
Ratio	Large White	PC aa C36:4 / lysoPC a C18:0	6	MARC0055666	27899607	G	A	0.065	-0.291232	0.0390959	2.48505e-13	2.42045e+07	2/99/686	6.09784
Ratio	Large White	PC aa C36:2 / PC aa C36:5	6	MARC0055666	27899607	G	A	0.065	0.00694573	0.000972497	2.10215e-12	1.81181e+07	2/99/686	6.3867
Ratio	Large White	PC aa C34:2 / PC aa C36:1	6	MARC0055666	27899607	G	A	0.065	-0.343612	0.0418085	8.50344e-16	1.66911e+07	2/99/686	8.51645
Ratio	Large White	PC aa C36:4 / PC ae C38:1	6	MARC0055666	27899607	G	A	0.065	-0.934282	0.12808	7.35432e-13	1.53155e+07	2/99/686	6.89048
Ratio	Large White	PC aa C34:3 / PC aa C36:2	6	MARC0055666	27899607	G	A	0.065	-0.00589837	0.000832162	3.03964e-12	1.25301e+07	2/99/686	8.32218
Ratio	Large White	PC aa C38:5 / PC aa C42:4	6	MARC0055666	27899607	G	A	0.065	-2.40933	0.361438	4.96109e-11	1.2104e+07	2/99/686	6.21692
Ratio	Large White	PC aa C38:5 / PC aa C40:4	6	MARC0055666	27899607	G	A	0.065	-0.31797	0.0458377	8.40157e-12	9.51624e+06	2/99/686	8.5202
Ratio	Large White	PC aa C36:4 / PC aa C40:4	6	MARC0055666	27899607	G	A	0.065	-0.601532	0.0832749	1.20318e-12	9.3615e+06	2/99/686	5.73703
Ratio	Large White	PC aa C36:4 / PC ae C38:2	6	MARC0055666	27899607	G	A	0.065	-4.01017	0.555202	1.20756e-12	9.3275e+06	2/99/686	4.16659
Ratio	Large White	PC aa C38:5 / PC aa C40:2	6	MARC0055666	27899607	G	A	0.065	-0.205997	0.0313718	9.39055e-11	6.39463e+06	2/99/686	5.57779
Ratio	Large White	PC aa C36:4 / PC aa C42:4	6	MARC0055666	27899607	G	A	0.065	-8.59964	1.20294	2.00783e-12	5.60981e+06	2/99/686	10.2509
Ratio	Large White	PC aa C36:4 / PC aa C40:2	6	MARC0055666	27899607	G	A	0.065	-1.26754	0.177454	2.0911e-12	5.38644e+06	2/99/686	8.10176
Ratio	Large White	PC aa C38:6 / PC aa C42:4	6	MARC0055666	27899607	G	A	0.065	-0.192194	0.0289007	5.49258e-11	5.30679e+06	2/99/686	6.08708
Ratio	Large White	PC aa C38:4 / lysoPC a C16:0	6	MARC0055666	27899607	G	A	0.065	0.143349	0.0215053	4.96824e-11	2.97835e+06	2/99/686	8.42497
Ratio	Large White	PC aa C38:5 / PC aa C42:5	6	MARC0055666	27899607	G	A	0.065	-1.54272	0.240354	2.38243e-10	2.5205e+06	2/99/686	5.7124
Ratio	Large White	PC aa C38:6 / PC aa C42:1	6	MARC0055666	27899607	G	A	0.065	-0.375976	0.0575565	1.16531e-10	2.50132e+06	2/99/686	6.08832
Ratio	Large White	PC aa C38:5 / PC ae C38:1	6	MARC0055666	27899607	G	A	0.065	-0.365348	0.0570832	2.66966e-10	2.24931e+06	2/99/686	6.51789
Ratio	Large White	PC aa C40:5 / lysoPC a C16:0	6	MARC0055666	27899607	G	A	0.065	0.318608	0.037223	5.95487e-17	2.14393e+06	2/99/686	6.33295
Ratio	Large White	PC aa C36:2 / PC aa C38:6	6	MARC0055666	27899607	G	A	0.065	0.0853363	0.0125156	1.84028e-11	2.06963e+06	2/99/686	9.01476
Ratio	Large White	PC aa C38:5 / PC aa C42:1	6	MARC0055666	27899607	G	A	0.065	-0.656847	0.103296	3.45083e-10	1.74014e+06	2/99/686	5.62427
Ratio	Large White	PC aa C36:5 / PC aa C38:4	6	MARC0055666	27899607	G	A	0.065	-0.0544252	0.00831857	1.09157e-10	1.35559e+06	2/99/686	8.07239
Ratio	Large White	PC aa C38:5 / PC ae C40:5	6	MARC0055666	27899607	G	A	0.065	-1.13175	0.179282	4.58921e-10	1.30848e+06	2/99/686	5.15853
Ratio	Large White	PC aa C36:4 / PC aa C42:1	6	MARC0055666	27899607	G	A	0.065	-1.17474	0.169481	8.71316e-12	1.2927e+06	2/99/686	5.55676
Ratio	Large White	PC aa C38:5 / PC ae C38:2	6	MARC0055666	27899607	G	A	0.065	-0.25178	0.0399387	4.83652e-10	1.24158e+06	2/99/686	11.2404
Ratio	Large White	PC aa C36:3 / PC ae C38:1	6	MARC0055666	27899607	G	A	0.065	-0.113741	0.0188441	2.43895e-09	1.22897e+06	2/99/686	4.80712
Ratio	Large White	PC aa C36:4 / PC aa C42:5	6	MARC0055666	27899607	G	A	0.065	-3.21284	0.464907	9.99874e-12	1.1265e+06	2/99/686	5.14311
Ratio	Large White	PC aa C36:1 / PC aa C38:6	6	MARC0055666	27899607	G	A	0.065	0.0730178	0.00931334	1.47093e-14	964913	2/99/686	4.34159
Ratio	Large White	PC aa C34:2 / PC ae C38:1	6	MARC0055666	27899607	G	A	0.065	-0.130327	0.0217755	3.2917e-09	910596	2/99/686	8.71485
Ratio	Large White	PC aa C36:4 / PC aa C42:2	6	MARC0055666	27899607	G	A	0.065	-1.23285	0.181175	2.01238e-11	559713	2/99/686	5.72118
Ratio	Large White	PC aa C38:6 / PC aa C40:5	6	MARC0055666	27899607	G	A	0.065	-0.134907	0.0161148	2.60619e-16	489866	2/99/686	6.93838
Ratio	Large White	PC aa C36:5 / PC ae C38:1	6	MARC0055666	27899607	G	A	0.065	-0.144467	0.0241723	3.45989e-09	464650	2/99/686	5.32041
Ratio	Large White	PC aa C38:5 / lysoPC a C18:0	6	MARC0055666	27899607	G	A	0.065	-0.137752	0.0201145	1.51016e-11	398297	2/99/686	8.12323
Ratio	Large White	PC aa C38:6 / lysoPC a C18:0	6	MARC0055666	27899607	G	A	0.065	-0.100195	0.0148057	2.56986e-11	234057	2/99/686	7.377
Ratio	Large White	PC aa C36:5 / PC ae C38:2	6	MARC0055666	27899607	G	A	0.065	-0.144321	0.0246724	7.24139e-09	222007	2/99/686	4.88687
Ratio	Large White	PC aa C36:1 / PC ae C38:0	6	MARC0055666	27899607	G	A	0.065	0.063799	0.00835985	6.74465e-14	210436	2/99/686	4.4244
Ratio	Large White	PC aa C38:0 / PC aa C38:6	6	MARC0055666	27899607	G	A	0.065	3.17827	0.518974	1.44206e-09	202127	2/99/686	4.3534
Ratio	Large White	PC ae C38:2 / lysoPC a C16:0	6	MARC0055666	27899607	G	A	0.065	0.233897	0.0384045	1.76476e-09	194264	2/99/686	4.81952
Ratio	Large White	PC aa C34:3 / PC ae C38:2	6	MARC0055666	27899607	G	A	0.065	-0.132356	0.0237539	3.46495e-08	192961	2/99/686	4.97436
Single	Large White	PC aa C40:5	6	ALGA0034984	28950815	A	G	0.05	0.553527	0.0745652	2.98166e-13	-	2/75/710	2.65659
Single	Large White	PC aa C36:1	6	ALGA0034984	28950815	A	G	0.05	0.727253	0.106369	1.62696e-11	-	2/75/710	2.45151
Single	Large White	lysoPC a C18:0	6	ALGA0034984	28950815	A	G	0.05	2.49024	0.405274	1.27562e-09	-	2/75/710	6.54392
Single	Large White	PC aa C36:4	6	ALGA0034984	28950815	A	G	0.05	-3.34026	0.547256	1.63e-09	-	2/75/710	2.82559
Single	Large White	PC aa C36:2	6	ALGA0034984	28950815	A	G	0.05	1.68222	0.296719	2.0152e-08	-	2/75/710	2.44409
Single	Large White	PC aa C38:4	6	ALGA0034984	28950815	A	G	0.05	16.4536	3.30588	7.94195e-07	-	2/75/710	5.60676
Single	Large White	PC aa C38:5	6	ALGA0034984	28950815	A	G	0.05	-3.59773	0.752077	2.05645e-06	-	2/75/710	2.07622
Ratio	Large White	PC aa C38:4 / PC aa C38:5	6	ALGA0034984	28950815	A	G	0.05	0.00775703	0.000653772	5.59986e-30	1.41824e+23	2/75/710	6.31903
Ratio	Large White	PC aa C38:5 / PC aa C40:5	6	ALGA0034984	28950815	A	G	0.05	-0.415589	0.0337429	5.47035e-32	5.45058e+18	2/75/710	6.88692
Ratio	Large White	PC aa C38:6 / PC aa C40:6	6	ALGA0034984	28950815	A	G	0.05	-0.213328	0.0206576	1.58882e-23	1.58401e+18	2/75/710	7.28379
Ratio	Large White	PC aa C38:5 / PC aa C42:5	6	ALGA0034984	28950815	A	G	0.05	-2.68064	0.256827	5.73471e-24	3.58598e+17	2/75/710	5.08261
Ratio	Large White	lysoPC a C16:0 / lysoPC a C18:0	6	ALGA0034984	28950815	A	G	0.05	-0.359211	0.0321911	6.17252e-27	2.06661e+17	2/75/710	7.6099
Ratio	Large White	PC aa C36:4 / PC aa C38:4	6	ALGA0034984	28950815	A	G	0.05	-0.0723211	0.00649805	8.18036e-27	1.99258e+17	2/75/710	8.1277
Ratio	Large White	PC aa C36:1 / PC aa C36:4	6	ALGA0034984	28950815	A	G	0.05	0.484121	0.0421943	2.81946e-28	5.77048e+16	2/75/710	8.64622
Ratio	Large White	PC aa C36:4 / PC aa C42:5	6	ALGA0034984	28950815	A	G	0.05	-5.3569	0.496928	2.3275e-25	7003235230930000	2/75/710	5.81617
Ratio	Large White	PC aa C34:1 / PC aa C36:1	6	ALGA0034984	28950815	A	G	0.05	-0.540761	0.0480561	2.47314e-27	6578522381650000	2/75/710	6.54782
Ratio	Large White	PC aa C36:2 / PC aa C36:4	6	ALGA0034984	28950815	A	G	0.05	0.0343013	0.00318908	2.92524e-25	5572210242180000	2/75/710	4.68261
Ratio	Large White	PC aa C36:4 / PC aa C40:5	6	ALGA0034984	28950815	A	G	0.05	-0.865433	0.0749763	1.42052e-28	2098993396080000	2/75/710	7.31957
Ratio	Large White	PC aa C34:2 / PC aa C36:2	6	ALGA0034984	28950815	A	G	0.05	-0.148338	0.0143663	1.60996e-23	1251707652180000	2/75/710	10.8707
Ratio	Large White	PC aa C36:2 / PC aa C38:5	6	ALGA0034984	28950815	A	G	0.05	0.0434611	0.00423767	3.04186e-23	662489393814000	2/75/710	7.08057
Ratio	Large White	PC aa C36:2 / PC aa C36:3	6	ALGA0034984	28950815	A	G	0.05	0.0275409	0.00269404	4.10876e-23	490463908932000	2/75/710	5.14151
Ratio	Large White	PC aa C36:2 / PC aa C36:5	6	ALGA0034984	28950815	A	G	0.05	0.0106555	0.00105008	8.16292e-23	246872046478000	2/75/710	7.88855
Ratio	Large White	PC aa C36:1 / PC aa C38:5	6	ALGA0034984	28950815	A	G	0.05	0.132613	0.0121643	7.31283e-26	222480459346000	2/75/710	7.84307
Ratio	Large White	PC aa C38:5 / PC aa C42:4	6	ALGA0034984	28950815	A	G	0.05	-3.68094	0.391072	5.26338e-20	39070954935300	2/75/710	11.9337
Ratio	Large White	PC aa C36:1 / PC aa C36:5	6	ALGA0034984	28950815	A	G	0.05	0.00814326	0.000763139	6.52365e-25	24939454878500	2/75/710	5.27443
Ratio	Large White	PC aa C36:4 / lysoPC a C18:0	6	ALGA0034984	28950815	A	G	0.05	-0.430351	0.0423836	7.70101e-23	16564309949500	2/75/710	13.599
Ratio	Large White	PC aa C36:2 / lysoPC a C16:0	6	ALGA0034984	28950815	A	G	0.05	0.115711	0.0118104	1.86193e-21	10823144107100	2/75/710	4.28876
Ratio	Large White	PC aa C36:4 / PC ae C38:2	6	ALGA0034984	28950815	A	G	0.05	-6.01132	0.600579	2.83093e-22	5757837798120	2/75/710	9.71725
Ratio	Large White	PC aa C36:4 / PC aa C42:4	6	ALGA0034984	28950815	A	G	0.05	-12.922	1.29887	4.86791e-22	3348463705080	2/75/710	7.43624
Ratio	Large White	PC aa C38:6 / PC aa C42:5	6	ALGA0034984	28950815	A	G	0.05	-0.390438	0.0432435	1.32701e-18	3158677659790	2/75/710	7.91573
Ratio	Large White	PC aa C34:2 / PC ae C38:2	6	ALGA0034984	28950815	A	G	0.05	-2.14705	0.25535	1.95834e-16	1867223057110	2/75/710	4.18792
Ratio	Large White	PC aa C38:5 / PC aa C40:2	6	ALGA0034984	28950815	A	G	0.05	-0.307741	0.0341631	1.57625e-18	1304651298530	2/75/710	14.4784
Ratio	Large White	PC aa C36:4 / PC ae C32:2	6	ALGA0034984	28950815	A	G	0.05	-6.95007	0.711812	2.49829e-21	652446429443	2/75/710	5.6475
Ratio	Large White	PC aa C36:5 / PC aa C38:4	6	ALGA0034984	28950815	A	G	0.05	-0.0808522	0.00906089	3.16726e-18	250751264263	2/75/710	10.9818
Ratio	Large White	PC aa C36:4 / PC aa C40:2	6	ALGA0034984	28950815	A	G	0.05	-1.8543	0.192585	8.16919e-21	199530577638	2/75/710	9.98132
Ratio	Large White	PC aa C34:1 / PC aa C36:2	6	ALGA0034984	28950815	A	G	0.05	-0.126886	0.0136822	1.711e-19	117778615492	2/75/710	5.94232
Ratio	Large White	PC aa C38:5 / PC ae C38:2	6	ALGA0034984	28950815	A	G	0.05	-0.376215	0.0436182	3.52941e-17	58266209291	2/75/710	7.83191
Ratio	Large White	PC aa C38:5 / PC aa C42:1	6	ALGA0034984	28950815	A	G	0.05	-0.970732	0.112614	3.67893e-17	5.58982e+10	2/75/710	8.39429
Ratio	Large White	PC aa C36:3 / PC ae C38:2	6	ALGA0034984	28950815	A	G	0.05	-0.390934	0.0494548	9.10486e-15	4.01615e+10	2/75/710	4.03143
Ratio	Large White	PC aa C38:5 / PC aa C40:6	6	ALGA0034984	28950815	A	G	0.05	-0.456435	0.0532175	5.18884e-17	3.96323e+10	2/75/710	4.51848
Ratio	Large White	PC aa C38:5 / lysoPC a C18:0	6	ALGA0034984	28950815	A	G	0.05	-0.207081	0.0218985	3.61313e-20	3.53051e+10	2/75/710	7.05052
Ratio	Large White	PC aa C36:4 / PC aa C42:1	6	ALGA0034984	28950815	A	G	0.05	-1.72129	0.18369	7.52264e-20	2.1668e+10	2/75/710	5.39061
Ratio	Large White	PC aa C36:5 / PC aa C42:5	6	ALGA0034984	28950815	A	G	0.05	-0.277874	0.0334173	4.03824e-16	10379759123	2/75/710	5.28665
Ratio	Large White	PC aa C38:5 / PC aa C42:6	6	ALGA0034984	28950815	A	G	0.05	-4.00537	0.479508	3.01076e-16	6.83036e+09	2/75/710	7.46068
Ratio	Large White	PC aa C38:5 / PC aa C40:4	6	ALGA0034984	28950815	A	G	0.05	-0.42064	0.0504117	3.22918e-16	6.36835e+09	2/75/710	7.53681
Ratio	Large White	PC aa C36:4 / PC ae C38:1	6	ALGA0034984	28950815	A	G	0.05	-1.28573	0.139698	3.09085e-19	5.27364e+09	2/75/710	13.8594
Ratio	Large White	PC aa C38:6 / PC ae C42:3	6	ALGA0034984	28950815	A	G	0.05	-1.64081	0.227308	1.24557e-12	2.63894e+09	2/75/710	6.20967
Ratio	Large White	PC aa C36:1 / lysoPC a C16:0	6	ALGA0034984	28950815	A	G	0.05	0.265985	0.0276321	8.35092e-21	1.94824e+09	2/75/710	4.28379
Ratio	Large White	PC aa C36:5 / PC ae C38:2	6	ALGA0034984	28950815	A	G	0.05	-0.215086	0.0270022	5.79266e-15	1.71845e+09	2/75/710	8.65187
Ratio	Large White	PC aa C36:0 / PC aa C36:4	6	ALGA0034984	28950815	A	G	0.05	0.0156179	0.00172394	1.02985e-18	1.58276e+09	2/75/710	5.16308
Ratio	Large White	PC aa C38:5 / PC ae C32:2	6	ALGA0034984	28950815	A	G	0.05	-1.59862	0.196387	1.55016e-15	1.32661e+09	2/75/710	9.33687
Ratio	Large White	PC aa C36:4 / PC ae C40:3	6	ALGA0034984	28950815	A	G	0.05	-2.86673	0.31843	1.64693e-18	9.89723e+08	2/75/710	10.3842
Ratio	Large White	PC aa C34:3 / PC aa C36:2	6	ALGA0034984	28950815	A	G	0.05	-0.00793883	0.000913704	2.12446e-17	9.48569e+08	2/75/710	4.00331
Ratio	Large White	PC aa C38:4 / lysoPC a C16:0	6	ALGA0034984	28950815	A	G	0.05	0.193087	0.0236114	1.16412e-15	6.8223e+08	2/75/710	9.44375
Ratio	Large White	PC aa C42:5 / lysoPC a C16:0	6	ALGA0034984	28950815	A	G	0.05	0.855442	0.107584	6.43705e-15	6.51168e+08	2/75/710	8.46632
Ratio	Large White	PC aa C38:5 / PC ae C40:5	6	ALGA0034984	28950815	A	G	0.05	-1.58379	0.197052	3.37596e-15	6.09146e+08	2/75/710	5.45131
Ratio	Large White	PC aa C38:5 / PC ae C38:1	6	ALGA0034984	28950815	A	G	0.05	-0.50066	0.0627527	5.26349e-15	3.90702e+08	2/75/710	15.1738
Ratio	Large White	PC aa C36:4 / PC ae C32:1	6	ALGA0034984	28950815	A	G	0.05	-5.81899	0.654894	4.31659e-18	3.77613e+08	2/75/710	4.16517
Ratio	Large White	PC aa C38:5 / PC ae C40:3	6	ALGA0034984	28950815	A	G	0.05	-0.696701	0.0876475	6.55849e-15	3.13556e+08	2/75/710	7.26328
Ratio	Large White	PC aa C36:5 / PC aa C40:5	6	ALGA0034984	28950815	A	G	0.05	-0.0577039	0.00585628	1.13481e-21	2.62746e+08	2/75/710	8.5891
Ratio	Large White	PC aa C38:0 / PC aa C38:5	6	ALGA0034984	28950815	A	G	0.05	3.1627	0.401164	1.06464e-14	1.9316e+08	2/75/710	6.23778
Ratio	Large White	PC aa C34:2 / PC aa C36:1	6	ALGA0034984	28950815	A	G	0.05	-0.430071	0.0460389	9.63983e-20	1.68775e+08	2/75/710	8.75279
Ratio	Large White	PC ae C36:2 / PC ae C38:2	6	ALGA0034984	28950815	A	G	0.05	-0.267457	0.0374855	2.20837e-12	1.65582e+08	2/75/710	11.9307
Ratio	Large White	PC aa C38:5 / PC ae C42:2	6	ALGA0034984	28950815	A	G	0.05	-0.686852	0.0873524	1.24213e-14	1.65559e+08	2/75/710	6.98287
Ratio	Large White	PC aa C38:5 / PC ae C40:4	6	ALGA0034984	28950815	A	G	0.05	-2.16062	0.275201	1.35688e-14	1.51558e+08	2/75/710	9.11716
Ratio	Large White	PC ae C38:2 / lysoPC a C16:0	6	ALGA0034984	28950815	A	G	0.05	0.321988	0.0422031	6.84863e-14	1.49974e+08	2/75/710	11.5828
Ratio	Large White	PC aa C36:4 / PC aa C42:6	6	ALGA0034984	28950815	A	G	0.05	-2.15427	0.247135	1.69153e-17	9.63628e+07	2/75/710	4.2815
Ratio	Large White	PC aa C36:5 / PC aa C42:4	6	ALGA0034984	28950815	A	G	0.05	-0.222346	0.0294969	1.32173e-13	7.53135e+07	2/75/710	12.6395
Ratio	Large White	PC aa C36:4 / PC aa C40:6	6	ALGA0034984	28950815	A	G	0.05	-0.547849	0.0630803	2.18781e-17	7.45037e+07	2/75/710	6.5164
Ratio	Large White	PC aa C36:1 / PC aa C36:3	6	ALGA0034984	28950815	A	G	0.05	0.191304	0.0207205	2.42134e-19	6.71925e+07	2/75/710	5.84532
Ratio	Large White	PC aa C36:0 / PC aa C38:5	6	ALGA0034984	28950815	A	G	0.05	0.0152665	0.00197589	3.39048e-14	6.06538e+07	2/75/710	7.63647
Ratio	Large White	PC aa C38:5 / PC ae C38:6	6	ALGA0034984	28950815	A	G	0.05	-6.84339	0.885818	3.41152e-14	6.02797e+07	2/75/710	5.18585
Ratio	Large White	PC aa C36:4 / PC ae C40:2	6	ALGA0034984	28950815	A	G	0.05	-21.0301	2.4312	2.89249e-17	5.63529e+07	2/75/710	6.68014
Ratio	Large White	PC aa C36:4 / PC aa C42:2	6	ALGA0034984	28950815	A	G	0.05	-1.71007	0.198071	3.29991e-17	4.93954e+07	2/75/710	6.07553
Ratio	Large White	PC aa C36:4 / PC aa C40:4	6	ALGA0034984	28950815	A	G	0.05	-0.790227	0.0915619	3.38231e-17	4.81919e+07	2/75/710	6.73373
Ratio	Large White	PC aa C30:0 / PC aa C36:4	6	ALGA0034984	28950815	A	G	0.05	7.48736	0.869792	4.04064e-17	4.03402e+07	2/75/710	10.0374
Ratio	Large White	PC aa C36:4 / PC aa C38:0	6	ALGA0034984	28950815	A	G	0.05	-4.12719	0.479946	4.33899e-17	3.75664e+07	2/75/710	9.34686
Ratio	Large White	PC aa C36:5 / PC ae C38:1	6	ALGA0034984	28950815	A	G	0.05	-0.197115	0.0266132	3.35473e-13	2.96727e+07	2/75/710	4.93075
Ratio	Large White	PC aa C32:0 / PC aa C36:2	6	ALGA0034984	28950815	A	G	0.05	-0.152832	0.0185375	6.97508e-16	2.88914e+07	2/75/710	7.91883
Ratio	Large White	PC aa C38:4 / PC aa C38:6	6	ALGA0034984	28950815	A	G	0.05	0.0331365	0.00427897	2.97941e-14	2.66561e+07	2/75/710	5.42805
Ratio	Large White	PC aa C34:4 / PC aa C36:2	6	ALGA0034984	28950815	A	G	0.05	-0.00640849	0.00077914	8.09733e-16	2.48872e+07	2/75/710	11.7894
Ratio	Large White	PC aa C36:4 / SM C16:0	6	ALGA0034984	28950815	A	G	0.05	-0.170807	0.0200198	7.40824e-17	2.20026e+07	2/75/710	11.1712
Ratio	Large White	PC aa C38:0 / PC aa C38:6	6	ALGA0034984	28950815	A	G	0.05	3.74365	0.576683	1.50603e-10	2.18254e+07	2/75/710	7.58573
Ratio	Large White	PC aa C36:5 / PC ae C32:2	6	ALGA0034984	28950815	A	G	0.05	-0.240001	0.0326204	4.74256e-13	2.09895e+07	2/75/710	13.6604
Ratio	Large White	PC aa C34:2 / PC ae C38:1	6	ALGA0034984	28950815	A	G	0.05	-0.158666	0.024147	9.12379e-11	1.84682e+07	2/75/710	4.3846
Ratio	Large White	PC aa C40:5 / lysoPC a C16:0	6	ALGA0034984	28950815	A	G	0.05	0.391923	0.041041	1.61974e-20	1.84083e+07	2/75/710	5.7896
Ratio	Large White	PC aa C38:6 / PC aa C42:1	6	ALGA0034984	28950815	A	G	0.05	-0.420968	0.0641635	9.72121e-11	1.8283e+07	2/75/710	9.0211
Ratio	Large White	PC aa C36:4 / SM C16:1	6	ALGA0034984	28950815	A	G	0.05	-1.6662	0.195985	9.4044e-17	1.73323e+07	2/75/710	5.16818
Ratio	Large White	PC aa C34:2 / PC ae C32:2	6	ALGA0034984	28950815	A	G	0.05	-0.655235	0.100102	1.07069e-10	1.57375e+07	2/75/710	5.2008
Ratio	Large White	PC aa C36:5 / PC aa C40:2	6	ALGA0034984	28950815	A	G	0.05	-0.13899	0.0190743	7.76167e-13	1.28251e+07	2/75/710	8.30555
Ratio	Large White	PC aa C36:5 / lysoPC a C18:0	6	ALGA0034984	28950815	A	G	0.05	-0.0699936	0.00824214	1.01364e-16	1.25845e+07	2/75/710	7.48288
Ratio	Large White	PC aa C38:5 / SM C16:1	6	ALGA0034984	28950815	A	G	0.05	-0.505006	0.0672828	1.66329e-13	1.23638e+07	2/75/710	4.28093
Ratio	Large White	PC aa C38:5 / PC ae C36:5	6	ALGA0034984	28950815	A	G	0.05	-0.91609	0.122076	1.6805e-13	1.22372e+07	2/75/710	5.76788
Ratio	Large White	PC aa C38:6 / PC aa C42:4	6	ALGA0034984	28950815	A	G	0.05	-0.214452	0.0322114	5.23399e-11	1.1693e+07	2/75/710	7.95015
Ratio	Large White	PC aa C36:4 / SM (OH) C14:1	6	ALGA0034984	28950815	A	G	0.05	-11.4845	1.35991	1.46786e-16	1.11046e+07	2/75/710	7.35585
Ratio	Large White	PC aa C36:4 / PC ae C36:2	6	ALGA0034984	28950815	A	G	0.05	-0.30699	0.0363601	1.49111e-16	1.09314e+07	2/75/710	4.42913
Ratio	Large White	PC aa C42:4 / lysoPC a C16:0	6	ALGA0034984	28950815	A	G	0.05	0.278624	0.0384672	1.05013e-12	9.78089e+06	2/75/710	12.816
Ratio	Large White	PC aa C36:5 / PC aa C42:1	6	ALGA0034984	28950815	A	G	0.05	-0.311415	0.0430379	1.1046e-12	9.01177e+06	2/75/710	11.2924
Ratio	Large White	PC aa C36:4 / PC ae C40:4	6	ALGA0034984	28950815	A	G	0.05	-10.0561	1.19529	1.88636e-16	8.64098e+06	2/75/710	8.60544
Ratio	Large White	PC aa C38:5 / PC ae C42:3	6	ALGA0034984	28950815	A	G	0.05	-1.13755	0.15319	2.93233e-13	7.01304e+06	2/75/710	6.44642
Ratio	Large White	PC aa C36:5 / PC aa C40:6	6	ALGA0034984	28950815	A	G	0.05	-0.209615	0.0292038	1.64851e-12	6.03843e+06	2/75/710	8.07619
Ratio	Large White	PC aa C38:5 / PC ae C32:1	6	ALGA0034984	28950815	A	G	0.05	-1.78532	0.241293	3.54163e-13	5.80652e+06	2/75/710	5.02936
Ratio	Large White	PC aa C38:5 / SM C16:0	6	ALGA0034984	28950815	A	G	0.05	-0.071236	0.00967348	4.52619e-13	4.54345e+06	2/75/710	6.32034
Ratio	Large White	PC aa C36:0 / PC aa C38:6	6	ALGA0034984	28950815	A	G	0.05	0.0349939	0.0056279	8.18994e-10	4.01342e+06	2/75/710	5.33176
Ratio	Large White	PC aa C34:3 / PC ae C38:2	6	ALGA0034984	28950815	A	G	0.05	-0.172266	0.026304	1.04776e-10	3.48997e+06	2/75/710	16.1599
Ratio	Large White	PC aa C36:4 / PC ae C36:3	6	ALGA0034984	28950815	A	G	0.05	-1.1673	0.140704	4.68181e-16	3.48157e+06	2/75/710	14.3302
Ratio	Large White	PC aa C36:4 / PC ae C34:1	6	ALGA0034984	28950815	A	G	0.05	-1.79067	0.216055	4.98591e-16	3.26922e+06	2/75/710	3.85193
Ratio	Large White	PC aa C34:1 / PC ae C38:2	6	ALGA0034984	28950815	A	G	0.05	-0.175022	0.0267978	1.17324e-10	3.11671e+06	2/75/710	6.50373
Ratio	Large White	PC aa C38:5 / PC ae C42:5	6	ALGA0034984	28950815	A	G	0.05	-8.08585	1.10979	7.80543e-13	2.63464e+06	2/75/710	12.8662
Ratio	Large White	PC aa C38:5 / PC aa C42:2	6	ALGA0034984	28950815	A	G	0.05	-0.462554	0.0635174	8.00557e-13	2.56878e+06	2/75/710	10.8048
Ratio	Large White	PC aa C34:4 / PC aa C36:1	6	ALGA0034984	28950815	A	G	0.05	-0.00497468	0.000563142	6.57416e-18	2.47478e+06	2/75/710	6.3131
Ratio	Large White	PC ae C38:4 / PC ae C40:4	6	ALGA0034984	28950815	A	G	0.05	-0.067046	0.0114638	7.28485e-09	2.20369e+06	2/75/710	12.1595
Ratio	Large White	PC aa C36:4 / PC ae C42:2	6	ALGA0034984	28950815	A	G	0.05	-1.04833	0.127428	7.98907e-16	2.04029e+06	2/75/710	10.5335
Ratio	Large White	PC aa C36:4 / PC ae C40:5	6	ALGA0034984	28950815	A	G	0.05	-2.61646	0.318105	8.09285e-16	2.01413e+06	2/75/710	5.69235
Ratio	Large White	PC ae C38:2 / PC ae C38:3	6	ALGA0034984	28950815	A	G	0.05	0.0881988	0.013662	1.88727e-10	1.93754e+06	2/75/710	8.63646
Ratio	Large White	PC aa C34:2 / PC aa C42:4	6	ALGA0034984	28950815	A	G	0.05	-0.317131	0.0499757	3.74473e-10	1.63432e+06	2/75/710	5.77024
Ratio	Large White	PC aa C36:0 / PC aa C36:5	6	ALGA0034984	28950815	A	G	0.05	0.102434	0.0146935	6.67265e-12	1.49182e+06	2/75/710	5.90485
Ratio	Large White	PC aa C36:4 / PC ae C42:3	6	ALGA0034984	28950815	A	G	0.05	-1.99104	0.243283	1.10922e-15	1.46951e+06	2/75/710	5.73227
Ratio	Large White	PC aa C38:5 / PC ae C40:2	6	ALGA0034984	28950815	A	G	0.05	-7.57095	1.05184	1.43522e-12	1.43285e+06	2/75/710	6.67774
Ratio	Large White	lysoPC a C16:1 / lysoPC a C18:0	6	ALGA0034984	28950815	A	G	0.05	-0.0697736	0.00849889	9.10908e-16	1.40038e+06	2/75/710	8.30917
Ratio	Large White	PC aa C34:4 / PC ae C38:2	6	ALGA0034984	28950815	A	G	0.05	-0.150649	0.0235798	2.86576e-10	1.27598e+06	2/75/710	13.1203
Ratio	Large White	PC aa C38:6 / PC ae C40:1	6	ALGA0034984	28950815	A	G	0.05	-0.308714	0.0514262	2.96073e-09	1.11019e+06	2/75/710	4.81459
Ratio	Large White	PC aa C36:3 / PC ae C38:1	6	ALGA0034984	28950815	A	G	0.05	-0.128324	0.0210273	1.63909e-09	1.08661e+06	2/75/710	6.17648
Ratio	Large White	PC aa C36:5 / PC aa C40:4	6	ALGA0034984	28950815	A	G	0.05	-0.172594	0.0249491	9.5374e-12	1.04372e+06	2/75/710	8.68208
Ratio	Large White	PC aa C36:5 / PC aa C38:0	6	ALGA0034984	28950815	A	G	0.05	-0.354087	0.051279	1.03779e-11	959188	2/75/710	5.64378
Ratio	Large White	PC aa C32:2 / PC ae C38:2	6	ALGA0034984	28950815	A	G	0.05	-0.132176	0.0209494	4.68598e-10	780340	2/75/710	5.39513
Ratio	Large White	PC aa C36:4 / PC ae C34:2	6	ALGA0034984	28950815	A	G	0.05	-0.708485	0.0874649	2.09981e-15	776263	2/75/710	5.55637
Ratio	Large White	PC aa C34:2 / PC aa C42:5	6	ALGA0034984	28950815	A	G	0.05	-0.824192	0.117843	5.73326e-12	731102	2/75/710	9.77263
Ratio	Large White	PC aa C36:4 / PC ae C42:5	6	ALGA0034984	28950815	A	G	0.05	-6.80358	0.841502	2.35571e-15	691938	2/75/710	7.69558
Ratio	Large White	PC aa C32:3 / PC aa C36:4	6	ALGA0034984	28950815	A	G	0.05	10.8095	1.34006	2.71137e-15	601172	2/75/710	7.76574
Ratio	Large White	PC aa C34:2 / PC aa C36:0	6	ALGA0034984	28950815	A	G	0.05	-0.00550284	0.000916005	2.88531e-09	583995	2/75/710	7.66899
Ratio	Large White	PC aa C34:4 / PC ae C32:2	6	ALGA0034984	28950815	A	G	0.05	-0.108062	0.0188627	1.44168e-08	576451	2/75/710	7.04908
Ratio	Large White	PC aa C36:4 / PC ae C36:5	6	ALGA0034984	28950815	A	G	0.05	-2.40263	0.298416	3.0411e-15	535991	2/75/710	7.42575
Ratio	Large White	PC aa C36:5 / PC ae C42:2	6	ALGA0034984	28950815	A	G	0.05	-0.249203	0.0366233	2.01571e-11	493842	2/75/710	7.43191
Ratio	Large White	PC aa C38:5 / PC ae C40:6	6	ALGA0034984	28950815	A	G	0.05	-4.30886	0.613132	4.57304e-12	449691	2/75/710	11.5698
Ratio	Large White	PC aa C32:2 / PC aa C36:2	6	ALGA0034984	28950815	A	G	0.05	-0.0108639	0.00141339	4.53491e-14	444375	2/75/710	8.25147
Ratio	Large White	PC aa C34:4 / PC ae C38:1	6	ALGA0034984	28950815	A	G	0.05	-0.188652	0.0317962	4.45894e-09	399433	2/75/710	8.41151
Ratio	Large White	PC aa C34:1 / PC ae C38:1	6	ALGA0034984	28950815	A	G	0.05	-0.0625524	0.0105435	4.46972e-09	398470	2/75/710	8.54806
Ratio	Large White	PC aa C36:4 / PC ae C38:6	6	ALGA0034984	28950815	A	G	0.05	-16.6519	2.07906	4.1703e-15	390860	2/75/710	11.7226
Ratio	Large White	PC aa C34:2 / PC aa C40:2	6	ALGA0034984	28950815	A	G	0.05	-0.650043	0.109464	4.3244e-09	389651	2/75/710	5.32662
Ratio	Large White	PC aa C34:2 / PC ae C32:1	6	ALGA0034984	28950815	A	G	0.05	-0.99601	0.167824	4.41602e-09	381567	2/75/710	8.74605
Ratio	Large White	PC aa C38:5 / SM (OH) C14:1	6	ALGA0034984	28950815	A	G	0.05	-1.93971	0.277502	5.89346e-12	348938	2/75/710	10.5384
Ratio	Large White	PC aa C36:5 / SM C16:1	6	ALGA0034984	28950815	A	G	0.05	-0.138114	0.0205035	3.15026e-11	315986	2/75/710	8.14383
Ratio	Large White	PC aa C34:3 / PC ae C32:2	6	ALGA0034984	28950815	A	G	0.05	-0.182427	0.0324887	2.72904e-08	304524	2/75/710	8.80497
Ratio	Large White	PC aa C36:5 / PC ae C32:1	6	ALGA0034984	28950815	A	G	0.05	-0.210514	0.0313223	3.47739e-11	286261	2/75/710	9.38605
Ratio	Large White	PC aa C38:5 / PC ae C38:5	6	ALGA0034984	28950815	A	G	0.05	-0.979315	0.140819	7.47209e-12	275218	2/75/710	5.77903
Ratio	Large White	PC aa C38:5 / PC ae C36:3	6	ALGA0034984	28950815	A	G	0.05	-0.212783	0.0306264	7.81606e-12	263106	2/75/710	9.85135
Ratio	Large White	PC ae C32:2 / lysoPC a C16:0	6	ALGA0034984	28950815	A	G	0.05	0.808692	0.120712	3.99916e-11	256833	2/75/710	7.91586
Ratio	Large White	PC aa C38:6 / PC ae C38:0	6	ALGA0034984	28950815	A	G	0.05	-0.55775	0.0970034	1.28051e-08	256693	2/75/710	6.24961
Ratio	Large White	PC aa C34:2 / PC aa C42:1	6	ALGA0034984	28950815	A	G	0.05	-0.6633	0.113092	6.6181e-09	254605	2/75/710	4.37849
Ratio	Large White	PC aa C38:5 / PC ae C38:0	6	ALGA0034984	28950815	A	G	0.05	-0.33299	0.0479667	8.11393e-12	253447	2/75/710	4.86757
Ratio	Large White	PC aa C38:5 / PC aa C42:0	6	ALGA0034984	28950815	A	G	0.05	-0.74292	0.10704	8.19609e-12	250907	2/75/710	8.24285
Ratio	Large White	PC aa C36:5 / PC ae C40:1	6	ALGA0034984	28950815	A	G	0.05	-0.18881	0.0281959	4.07677e-11	244174	2/75/710	10.2032
Ratio	Large White	PC aa C36:4 / PC ae C36:1	6	ALGA0034984	28950815	A	G	0.05	-0.335456	0.0422205	6.73518e-15	242013	2/75/710	6.14403
Ratio	Large White	PC aa C36:4 / PC ae C38:0	6	ALGA0034984	28950815	A	G	0.05	-0.522371	0.0657839	6.97141e-15	233812	2/75/710	10.1182
Ratio	Large White	PC aa C34:4 / PC aa C38:4	6	ALGA0034984	28950815	A	G	0.05	-0.381086	0.0540448	3.89798e-12	203745	2/75/710	8.02759
Ratio	Large White	PC aa C36:5 / PC ae C42:3	6	ALGA0034984	28950815	A	G	0.05	-0.323675	0.0486418	5.34965e-11	186076	2/75/710	9.18781
Ratio	Large White	PC aa C38:5 / PC ae C42:4	6	ALGA0034984	28950815	A	G	0.05	-0.804481	0.116723	1.13037e-11	181927	2/75/710	5.85178
Ratio	Large White	PC ae C38:1 / lysoPC a C16:0	6	ALGA0034984	28950815	A	G	0.05	0.174282	0.0262954	6.33861e-11	162041	2/75/710	5.71243
Ratio	Large White	PC aa C32:0 / PC ae C38:2	6	ALGA0034984	28950815	A	G	0.05	-0.0465857	0.0077138	2.39067e-09	152955	2/75/710	8.62695
Ratio	Large White	PC aa C38:5 / PC ae C40:1	6	ALGA0034984	28950815	A	G	0.05	-0.225204	0.0328123	1.36804e-11	150321	2/75/710	7.41776
Ratio	Large White	PC aa C36:5 / PC ae C38:6	6	ALGA0034984	28950815	A	G	0.05	-0.23195	0.0350391	6.67604e-11	149106	2/75/710	6.43551
Ratio	Large White	PC aa C32:3 / PC aa C38:5	6	ALGA0034984	28950815	A	G	0.05	5.84374	0.851734	1.38991e-11	147956	2/75/710	8.0421
Single	Large White	PC aa C40:5	6	ALGA0034982	28964755	A	C	0.071	0.614664	0.063634	6.24151e-21	-	4/104/679	2.9043
Single	Large White	PC aa C36:4	6	ALGA0034982	28964755	A	C	0.071	-4.07822	0.462987	8.07383e-18	-	4/104/679	2.13219
Single	Large White	PC aa C36:1	6	ALGA0034982	28964755	A	C	0.071	0.767595	0.0908122	1.38415e-16	-	4/104/679	5.03948
Single	Large White	lysoPC a C18:0	6	ALGA0034982	28964755	A	C	0.071	2.57369	0.346556	2.91716e-13	-	4/104/679	10.599
Single	Large White	PC aa C36:2	6	ALGA0034982	28964755	A	C	0.071	1.80834	0.253801	2.36313e-12	-	4/104/679	5.27716
Single	Large White	PC aa C38:5	6	ALGA0034982	28964755	A	C	0.071	-4.27621	0.645801	6.59919e-11	-	4/104/679	3.14435
Single	Large White	lysoPC a C16:0	6	ALGA0034982	28964755	A	C	0.071	-2.77847	0.42993	1.80807e-10	-	4/104/679	6.05966
Single	Large White	PC aa C38:4	6	ALGA0034982	28964755	A	C	0.071	16.4228	2.85845	1.31329e-08	-	4/104/679	8.32267
Single	Large White	PC aa C36:5	6	ALGA0034982	28964755	A	C	0.071	-0.188434	0.0333097	2.15974e-08	-	4/104/679	6.54903
Single	Large White	PC aa C40:4	6	ALGA0034982	28964755	A	C	0.071	0.306364	0.0606104	5.37208e-07	-	4/104/679	2.13931
Single	Large White	PC aa C34:2	6	ALGA0034982	28964755	A	C	0.071	-0.603878	0.124463	1.47611e-06	-	4/104/679	3.90744
Ratio	Large White	PC aa C38:4 / PC aa C38:5	6	ALGA0034982	28964755	A	C	0.071	0.0086772	0.000537922	9.33956e-51	7.06585e+39	4/104/679	12.0932
Ratio	Large White	PC aa C38:5 / PC aa C40:5	6	ALGA0034982	28964755	A	C	0.071	-0.475158	0.0274351	3.88522e-57	1.60647e+36	4/104/679	12.3559
Ratio	Large White	PC aa C38:6 / PC aa C40:6	6	ALGA0034982	28964755	A	C	0.071	-0.244348	0.0172895	1.47114e-40	1.57215e+34	4/104/679	7.06224
Ratio	Large White	lysoPC a C16:0 / lysoPC a C18:0	6	ALGA0034982	28964755	A	C	0.071	-0.404739	0.0266475	7.40386e-46	3.94005e+32	4/104/679	10.3312
Ratio	Large White	PC aa C36:1 / PC aa C36:4	6	ALGA0034982	28964755	A	C	0.071	0.554356	0.0346483	4.5995e-50	1.75537e+32	4/104/679	11.2715
Ratio	Large White	PC aa C34:2 / PC aa C36:2	6	ALGA0034982	28964755	A	C	0.071	-0.173778	0.0117792	1.2066e-43	1.9585e+31	4/104/679	14.264
Ratio	Large White	PC aa C36:4 / PC aa C40:5	6	ALGA0034982	28964755	A	C	0.071	-1.00296	0.0615335	1.19825e-51	5.20886e+30	4/104/679	8.01949
Ratio	Large White	PC aa C36:2 / PC aa C36:3	6	ALGA0034982	28964755	A	C	0.071	0.032363	0.00221222	5.05033e-43	4.67917e+30	4/104/679	8.55963
Ratio	Large White	PC aa C36:2 / PC aa C36:4	6	ALGA0034982	28964755	A	C	0.071	0.0405233	0.00260887	1.25154e-47	6.4511e+29	4/104/679	11.1433
Ratio	Large White	PC aa C36:4 / PC aa C38:4	6	ALGA0034982	28964755	A	C	0.071	-0.0824459	0.00533945	3.74148e-47	2.15792e+29	4/104/679	16.0814
Ratio	Large White	PC aa C36:2 / PC aa C38:5	6	ALGA0034982	28964755	A	C	0.071	0.0500747	0.00349598	1.68464e-41	1.40275e+29	4/104/679	5.82311
Ratio	Large White	PC aa C36:1 / PC aa C38:5	6	ALGA0034982	28964755	A	C	0.071	0.150698	0.010065	9.36393e-45	1.47818e+28	4/104/679	14.4187
Ratio	Large White	PC aa C34:1 / PC aa C36:1	6	ALGA0034982	28964755	A	C	0.071	-0.596967	0.0399351	1.24012e-44	1.11614e+28	4/104/679	9.55063
Ratio	Large White	PC aa C36:2 / lysoPC a C16:0	6	ALGA0034982	28964755	A	C	0.071	0.136218	0.00971467	5.14208e-40	4.59567e+27	4/104/679	8.6776
Ratio	Large White	PC aa C36:2 / PC aa C36:5	6	ALGA0034982	28964755	A	C	0.071	0.011893	0.000872096	3.78098e-38	6.25005e+25	4/104/679	9.13857
Ratio	Large White	PC aa C36:1 / PC aa C36:5	6	ALGA0034982	28964755	A	C	0.071	0.00900316	0.000636873	1.40995e-40	9.81702e+23	4/104/679	13.4825
Ratio	Large White	PC aa C34:2 / PC ae C38:2	6	ALGA0034982	28964755	A	C	0.071	-2.55969	0.214599	2.96229e-30	4.98299e+23	4/104/679	11.2323
Ratio	Large White	PC aa C36:4 / lysoPC a C18:0	6	ALGA0034982	28964755	A	C	0.071	-0.49732	0.0347965	2.40643e-41	3.35511e+23	4/104/679	14.7105
Ratio	Large White	PC aa C38:5 / PC aa C42:5	6	ALGA0034982	28964755	A	C	0.071	-2.72979	0.216057	1.9526e-33	3.37969e+22	4/104/679	12.3559
Ratio	Large White	PC aa C38:6 / PC aa C42:5	6	ALGA0034982	28964755	A	C	0.071	-0.421321	0.036539	1.60097e-28	1.44465e+22	4/104/679	8.60659
Ratio	Large White	PC aa C36:4 / PC ae C38:2	6	ALGA0034982	28964755	A	C	0.071	-6.9129	0.494643	8.66542e-40	9.31729e+21	4/104/679	6.74858
Ratio	Large White	PC aa C38:5 / PC aa C40:2	6	ALGA0034982	28964755	A	C	0.071	-0.351454	0.0281918	1.14252e-32	5.776e+21	4/104/679	11.7984
Ratio	Large White	PC aa C36:4 / PC aa C40:2	6	ALGA0034982	28964755	A	C	0.071	-2.18747	0.157805	3.09964e-39	2.60476e+21	4/104/679	8.16053
Ratio	Large White	PC aa C38:5 / lysoPC a C18:0	6	ALGA0034982	28964755	A	C	0.071	-0.233633	0.0182527	3.38033e-34	8.6298e+20	4/104/679	5.56395
Ratio	Large White	PC aa C36:3 / PC ae C38:2	6	ALGA0034982	28964755	A	C	0.071	-0.454427	0.0416701	7.07038e-26	5.26645e+20	4/104/679	8.61211
Ratio	Large White	PC aa C36:1 / lysoPC a C16:0	6	ALGA0034982	28964755	A	C	0.071	0.306385	0.0228071	3.56611e-37	3.88141e+20	4/104/679	12.7768
Ratio	Large White	PC aa C34:3 / PC aa C36:2	6	ALGA0034982	28964755	A	C	0.071	-0.00956907	0.000764456	6.69704e-33	3.52862e+20	4/104/679	18.7396
Ratio	Large White	PC aa C36:4 / PC aa C42:5	6	ALGA0034982	28964755	A	C	0.071	-5.70248	0.416858	2.36176e-38	3.41856e+20	4/104/679	8.04799
Ratio	Large White	PC aa C34:1 / PC aa C36:2	6	ALGA0034982	28964755	A	C	0.071	-0.143309	0.01146	7.62291e-33	3.10004e+20	4/104/679	9.15562
Ratio	Large White	PC aa C36:5 / PC aa C38:4	6	ALGA0034982	28964755	A	C	0.071	-0.0880174	0.00765813	2.31958e-28	5.66176e+19	4/104/679	13.708
Ratio	Large White	PC aa C36:4 / PC ae C38:1	6	ALGA0034982	28964755	A	C	0.071	-1.51917	0.112766	2.34518e-37	3.44274e+19	4/104/679	6.7072
Ratio	Large White	PC aa C36:4 / PC ae C40:3	6	ALGA0034982	28964755	A	C	0.071	-3.50356	0.260594	3.16692e-37	2.54942e+19	4/104/679	4.44875
Ratio	Large White	PC aa C36:4 / PC aa C42:4	6	ALGA0034982	28964755	A	C	0.071	-14.3517	1.07849	1.42487e-36	5.66635e+18	4/104/679	13.6806
Ratio	Large White	PC aa C34:2 / PC aa C36:1	6	ALGA0034982	28964755	A	C	0.071	-0.496142	0.0382298	5.03908e-35	2.74684e+18	4/104/679	6.40305
Ratio	Large White	PC aa C38:5 / PC aa C42:4	6	ALGA0034982	28964755	A	C	0.071	-3.84536	0.32831	2.60554e-29	2.53276e+18	4/104/679	8.52902
Ratio	Large White	PC aa C38:4 / PC aa C38:6	6	ALGA0034982	28964755	A	C	0.071	0.0405162	0.00362779	5.62432e-27	2.33502e+18	4/104/679	8.61609
Ratio	Large White	PC aa C36:4 / PC ae C32:2	6	ALGA0034982	28964755	A	C	0.071	-7.80096	0.590264	3.84321e-36	2.1008e+18	4/104/679	8.00738
Ratio	Large White	PC aa C38:5 / PC aa C40:4	6	ALGA0034982	28964755	A	C	0.071	-0.49346	0.0423543	4.83974e-29	1.36354e+18	4/104/679	10.606
Ratio	Large White	PC aa C36:1 / PC aa C36:3	6	ALGA0034982	28964755	A	C	0.071	0.220822	0.0172406	3.09302e-34	4.47508e+17	4/104/679	8.6441
Ratio	Large White	PC aa C38:5 / PC ae C40:3	6	ALGA0034982	28964755	A	C	0.071	-0.835254	0.0730934	4.45993e-28	1.47966e+17	4/104/679	9.07068
Ratio	Large White	PC aa C38:4 / lysoPC a C16:0	6	ALGA0034982	28964755	A	C	0.071	0.22263	0.0198416	3.3885e-27	5.3359e+16	4/104/679	18.3748
Ratio	Large White	PC aa C38:5 / PC ae C38:2	6	ALGA0034982	28964755	A	C	0.071	-0.415209	0.0367024	1.37292e-27	4.80667e+16	4/104/679	13.3896
Ratio	Large White	PC ae C36:2 / PC ae C38:2	6	ALGA0034982	28964755	A	C	0.071	-0.31237	0.0317719	1.37492e-21	2.7082e+16	4/104/679	11.8293
Ratio	Large White	PC aa C38:5 / PC aa C42:6	6	ALGA0034982	28964755	A	C	0.071	-4.50963	0.402552	4.02925e-27	1.63782e+16	4/104/679	18.4658
Ratio	Large White	PC aa C36:4 / PC ae C40:2	6	ALGA0034982	28964755	A	C	0.071	-25.4783	2.0055	9.34343e-34	8641181167819999	4/104/679	23.2511
Ratio	Large White	PC aa C36:5 / PC aa C40:5	6	ALGA0034982	28964755	A	C	0.071	-0.0654759	0.00490433	8.86552e-37	7040202149430000	4/104/679	11.4767
Ratio	Large White	PC aa C36:4 / PC ae C32:1	6	ALGA0034982	28964755	A	C	0.071	-6.90508	0.54542	1.49035e-33	5417393060570000	4/104/679	4.86823
Ratio	Large White	PC aa C40:5 / lysoPC a C16:0	6	ALGA0034982	28964755	A	C	0.071	0.455872	0.0342496	1.37743e-36	4531269102600000	4/104/679	19.989
Ratio	Large White	PC aa C38:5 / PC ae C38:1	6	ALGA0034982	28964755	A	C	0.071	-0.573842	0.0518661	1.54411e-26	4273772709640000	4/104/679	8.10773
Ratio	Large White	PC aa C38:6 / PC ae C42:3	6	ALGA0034982	28964755	A	C	0.071	-1.88286	0.189742	6.09953e-22	3791852193230000	4/104/679	6.43566
Ratio	Large White	PC aa C38:5 / PC ae C40:4	6	ALGA0034982	28964755	A	C	0.071	-2.54765	0.231886	3.24748e-26	2032096917080000	4/104/679	4.09555
Ratio	Large White	PC aa C38:5 / PC aa C40:6	6	ALGA0034982	28964755	A	C	0.071	-0.498043	0.045497	4.76201e-26	1.3858e+15	4/104/679	5.87373
Ratio	Large White	PC aa C34:2 / PC ae C38:1	6	ALGA0034982	28964755	A	C	0.071	-0.196977	0.0201215	1.99663e-21	739297738093000	4/104/679	11.5494
Ratio	Large White	PC aa C36:5 / PC ae C38:2	6	ALGA0034982	28964755	A	C	0.071	-0.231671	0.0228537	8.94771e-23	241373186646000	4/104/679	12.127
Ratio	Large White	PC aa C36:4 / PC aa C42:6	6	ALGA0034982	28964755	A	C	0.071	-2.5339	0.206006	6.47329e-32	1.24725e+14	4/104/679	9.78372
Ratio	Large White	PC aa C34:4 / PC aa C36:2	6	ALGA0034982	28964755	A	C	0.071	-0.00727205	0.00065928	2.13522e-26	110674043903000	4/104/679	12.9032
Ratio	Large White	PC aa C36:4 / PC aa C40:4	6	ALGA0034982	28964755	A	C	0.071	-0.944619	0.0769195	7.92357e-32	101896380759000	4/104/679	10.4409
Ratio	Large White	PC aa C38:5 / PC ae C40:5	6	ALGA0034982	28964755	A	C	0.071	-1.78025	0.167007	7.23581e-25	91201748856700	4/104/679	10.9387
Ratio	Large White	PC aa C36:5 / PC ae C38:1	6	ALGA0034982	28964755	A	C	0.071	-0.222333	0.0221881	2.5617e-22	84308779326200	4/104/679	8.75802
Ratio	Large White	PC ae C38:2 / lysoPC a C16:0	6	ALGA0034982	28964755	A	C	0.071	0.374629	0.0355662	2.35939e-24	76632955933000	4/104/679	7.09242
Ratio	Large White	PC ae C38:4 / PC ae C40:4	6	ALGA0034982	28964755	A	C	0.071	-0.0839455	0.00974518	3.85734e-17	57735497069100	4/104/679	16.9199
Ratio	Large White	PC aa C34:3 / PC ae C38:2	6	ALGA0034982	28964755	A	C	0.071	-0.20407	0.0224182	7.17756e-19	51877990917300	4/104/679	8.36817
Ratio	Large White	PC aa C36:4 / PC ae C40:4	6	ALGA0034982	28964755	A	C	0.071	-12.2073	1.00016	1.72534e-31	46795630769200	4/104/679	7.97752
Ratio	Large White	PC aa C36:4 / SM C16:0	6	ALGA0034982	28964755	A	C	0.071	-0.202265	0.016704	4.66353e-31	17312715167200	4/104/679	13.0683
Ratio	Large White	PC aa C36:5 / lysoPC a C18:0	6	ALGA0034982	28964755	A	C	0.071	-0.0767387	0.00695151	1.96055e-26	14879263718300	4/104/679	5.85475
Ratio	Large White	PC aa C36:3 / PC ae C38:1	6	ALGA0034982	28964755	A	C	0.071	-0.15715	0.0175716	2.68326e-18	14302151634800	4/104/679	3.74338
Ratio	Large White	PC aa C36:0 / PC aa C36:4	6	ALGA0034982	28964755	A	C	0.071	0.0171921	0.00142235	5.8246e-31	13861610316000	4/104/679	5.24163
Ratio	Large White	PC aa C38:5 / PC ae C32:2	6	ALGA0034982	28964755	A	C	0.071	-1.73821	0.166553	5.79734e-24	11383121066600	4/104/679	9.63604
Ratio	Large White	PC aa C36:4 / PC ae C34:1	6	ALGA0034982	28964755	A	C	0.071	-2.18931	0.181495	7.48273e-31	10789953983400	4/104/679	11.461
Ratio	Large White	PC aa C30:0 / PC aa C36:4	6	ALGA0034982	28964755	A	C	0.071	8.74747	0.726259	9.00781e-31	8963138999440	4/104/679	7.95758
Ratio	Large White	PC aa C38:5 / PC ae C38:6	6	ALGA0034982	28964755	A	C	0.071	-7.85149	0.754363	7.52636e-24	8768096888230	4/104/679	8.06746
Ratio	Large White	PC aa C38:5 / PC ae C42:5	6	ALGA0034982	28964755	A	C	0.071	-9.71857	0.934021	7.73834e-24	8527909466910	4/104/679	16.4911
Ratio	Large White	PC aa C36:4 / PC aa C42:1	6	ALGA0034982	28964755	A	C	0.071	-1.84045	0.152992	1.04823e-30	7702358647160	4/104/679	9.45904
Ratio	Large White	PC aa C38:5 / PC aa C42:1	6	ALGA0034982	28964755	A	C	0.071	-0.984807	0.0948567	9.5686e-24	6896712162700	4/104/679	14.184
Ratio	Large White	PC aa C36:2 / PC aa C38:6	6	ALGA0034982	28964755	A	C	0.071	0.125686	0.0117074	3.54297e-25	6669911588350	4/104/679	10.725
Ratio	Large White	PC aa C36:5 / PC aa C42:5	6	ALGA0034982	28964755	A	C	0.071	-0.277291	0.0285398	3.80601e-21	5.67454e+12	4/104/679	13.8067
Ratio	Large White	PC aa C36:5 / PC aa C40:2	6	ALGA0034982	28964755	A	C	0.071	-0.156092	0.0160673	3.84105e-21	5622786084830	4/104/679	6.74887
Ratio	Large White	PC aa C36:4 / PC ae C42:5	6	ALGA0034982	28964755	A	C	0.071	-8.37525	0.699615	1.90421e-30	4.23998e+12	4/104/679	5.354
Ratio	Large White	PC aa C34:4 / PC aa C36:1	6	ALGA0034982	28964755	A	C	0.071	-0.00555199	0.000475109	3.41005e-29	4.05904e+12	4/104/679	10.2991
Ratio	Large White	PC aa C38:5 / PC ae C36:5	6	ALGA0034982	28964755	A	C	0.071	-1.06737	0.103641	2.05724e-23	3207785573010	4/104/679	4.05205
Ratio	Large White	PC aa C36:4 / SM C16:1	6	ALGA0034982	28964755	A	C	0.071	-1.96144	0.164228	2.52878e-30	3192779750840	4/104/679	7.6848
Ratio	Large White	PC aa C38:5 / PC aa C40:3	6	ALGA0034982	28964755	A	C	0.071	-0.087891	0.00855343	2.54266e-23	2595387507570	4/104/679	9.52587
Ratio	Large White	PC aa C36:4 / PC ae C36:3	6	ALGA0034982	28964755	A	C	0.071	-1.41031	0.11873	4.89659e-30	1648867813900	4/104/679	12.1867
Ratio	Large White	PC aa C36:4 / PC aa C42:2	6	ALGA0034982	28964755	A	C	0.071	-1.94819	0.16464	7.7406e-30	1043049510770	4/104/679	6.00368
Ratio	Large White	PC aa C38:6 / PC ae C40:1	6	ALGA0034982	28964755	A	C	0.071	-0.388259	0.0433972	2.61328e-18	885037621289	4/104/679	12.0062
Ratio	Large White	PC aa C34:3 / PC aa C36:1	6	ALGA0034982	28964755	A	C	0.071	-0.0506361	0.00439743	1.8725e-28	739200673324	4/104/679	13.8574
Ratio	Large White	PC aa C38:0 / PC aa C38:6	6	ALGA0034982	28964755	A	C	0.071	4.35582	0.489591	3.93014e-18	588491144970	4/104/679	21.3797
Ratio	Large White	PC aa C38:6 / PC aa C42:4	6	ALGA0034982	28964755	A	C	0.071	-0.242951	0.0273307	4.17971e-18	553352663237	4/104/679	15.6727
Ratio	Large White	PC aa C38:5 / PC ae C42:2	6	ALGA0034982	28964755	A	C	0.071	-0.746636	0.0739165	1.23945e-22	532428308985	4/104/679	13.1277
Ratio	Large White	PC aa C38:5 / PC ae C40:2	6	ALGA0034982	28964755	A	C	0.071	-8.95683	0.886842	1.25512e-22	525783114867	4/104/679	6.06289
Ratio	Large White	PC aa C38:5 / PC ae C32:1	6	ALGA0034982	28964755	A	C	0.071	-2.05604	0.204611	1.9888e-22	331818412657	4/104/679	8.72309
Ratio	Large White	PC aa C34:2 / PC ae C32:2	6	ALGA0034982	28964755	A	C	0.071	-0.746171	0.0844863	6.67765e-18	2.21052e+11	4/104/679	15.7047
Ratio	Large White	PC aa C32:0 / PC aa C36:2	6	ALGA0034982	28964755	A	C	0.071	-0.163122	0.015731	1.07474e-23	219880342596	4/104/679	9.22562
Ratio	Large White	PC aa C36:5 / PC aa C40:4	6	ALGA0034982	28964755	A	C	0.071	-0.198418	0.0213417	1.40383e-19	153846449741	4/104/679	18.6534
Ratio	Large White	lysoPC a C16:1 / lysoPC a C18:0	6	ALGA0034982	28964755	A	C	0.071	-0.0763251	0.00724609	2.35938e-24	123640904118	4/104/679	6.97034
Ratio	Large White	PC aa C38:0 / PC aa C38:5	6	ALGA0034982	28964755	A	C	0.071	3.4026	0.3425	5.51468e-22	1.19666e+11	4/104/679	6.12325
Ratio	Large White	PC aa C36:4 / SM (OH) C14:1	6	ALGA0034982	28964755	A	C	0.071	-13.2405	1.14206	8.56229e-29	9.42952e+10	4/104/679	20.242
Ratio	Large White	PC aa C34:1 / PC ae C38:2	6	ALGA0034982	28964755	A	C	0.071	-0.189529	0.0228992	5.44257e-16	6.84158e+10	4/104/679	14.3192
Ratio	Large White	PC aa C36:1 / PC aa C38:6	6	ALGA0034982	28964755	A	C	0.071	0.0984521	0.00874997	2.49672e-27	55438918036	4/104/679	4.62114
Ratio	Large White	PC aa C38:5 / SM C16:0	6	ALGA0034982	28964755	A	C	0.071	-0.0810626	0.00823471	1.23249e-21	5.35433e+10	4/104/679	6.31934
Ratio	Large White	PC aa C34:2 / PC aa C40:4	6	ALGA0034982	28964755	A	C	0.071	-0.412156	0.046959	1.0426e-17	5.15259e+10	4/104/679	8.91569
Ratio	Large White	PC aa C34:4 / PC ae C38:1	6	ALGA0034982	28964755	A	C	0.071	-0.219485	0.0266578	7.59257e-16	5.05447e+10	4/104/679	13.9701
Ratio	Large White	PC aa C36:5 / PC ae C40:3	6	ALGA0034982	28964755	A	C	0.071	-0.203296	0.0221917	4.42002e-19	4.88626e+10	4/104/679	14.5876
Ratio	Large White	PC aa C38:6 / PC aa C40:5	6	ALGA0034982	28964755	A	C	0.071	-0.184672	0.0151012	1.35226e-31	4.61561e+10	4/104/679	14.2291
Ratio	Large White	PC aa C34:2 / PC aa C40:2	6	ALGA0034982	28964755	A	C	0.071	-0.801552	0.0928776	3.39126e-17	4.35269e+10	4/104/679	5.06713
Ratio	Large White	PC aa C36:4 / PC aa C40:6	6	ALGA0034982	28964755	A	C	0.071	-0.616681	0.0536302	2.19773e-28	3.67372e+10	4/104/679	5.03766
Ratio	Large White	PC aa C36:4 / PC ae C40:5	6	ALGA0034982	28964755	A	C	0.071	-3.07619	0.267652	2.32158e-28	3.47772e+10	4/104/679	5.38675
Ratio	Large White	PC ae C38:1 / lysoPC a C16:0	6	ALGA0034982	28964755	A	C	0.071	0.211245	0.0218276	5.3085e-21	3.40599e+10	4/104/679	10.6354
Ratio	Large White	PC aa C34:4 / PC ae C38:2	6	ALGA0034982	28964755	A	C	0.071	-0.164921	0.020161	1.14187e-15	3.26095e+10	4/104/679	18.1627
Ratio	Large White	PC aa C34:1 / PC ae C38:1	6	ALGA0034982	28964755	A	C	0.071	-0.0722348	0.00885657	1.37313e-15	2.79482e+10	4/104/679	23.4637
Ratio	Large White	PC aa C36:4 / PC ae C36:2	6	ALGA0034982	28964755	A	C	0.071	-0.350151	0.0305316	2.96662e-28	2.72156e+10	4/104/679	5.59095
Ratio	Large White	PC aa C38:6 / PC ae C38:0	6	ALGA0034982	28964755	A	C	0.071	-0.69382	0.0815118	8.67509e-17	2.66608e+10	4/104/679	11.3428
Ratio	Large White	PC aa C34:2 / PC ae C32:1	6	ALGA0034982	28964755	A	C	0.071	-1.21761	0.142139	5.63782e-17	2.61823e+10	4/104/679	20.6067
Ratio	Large White	PC aa C34:2 / PC aa C42:5	6	ALGA0034982	28964755	A	C	0.071	-0.86715	0.101347	6.10575e-17	2.41757e+10	4/104/679	12.4991
Ratio	Large White	PC aa C38:6 / PC aa C42:1	6	ALGA0034982	28964755	A	C	0.071	-0.461478	0.0543907	1.07668e-16	2.14814e+10	4/104/679	10.9633
Ratio	Large White	PC aa C36:4 / PC ae C36:5	6	ALGA0034982	28964755	A	C	0.071	-2.86845	0.250681	3.82893e-28	2.10864e+10	4/104/679	16.6037
Ratio	Large White	PC aa C38:6 / PC aa C42:6	6	ALGA0034982	28964755	A	C	0.071	-0.774375	0.0913268	1.12284e-16	2.05982e+10	4/104/679	6.86964
Ratio	Large White	PC aa C36:4 / PC ae C34:2	6	ALGA0034982	28964755	A	C	0.071	-0.846058	0.0739625	3.96947e-28	2.03398e+10	4/104/679	9.25123
Ratio	Large White	PC aa C38:5 / SM C16:1	6	ALGA0034982	28964755	A	C	0.071	-0.558627	0.0574514	3.56363e-21	1.85181e+10	4/104/679	12.2272
Ratio	Large White	PC aa C36:4 / PC aa C38:0	6	ALGA0034982	28964755	A	C	0.071	-4.63172	0.405355	4.49895e-28	1.7946e+10	4/104/679	22.1143
Ratio	Large White	PC aa C36:2 / PC ae C36:2	6	ALGA0034982	28964755	A	C	0.071	0.0390173	0.00386568	1.32988e-22	1.77695e+10	4/104/679	5.66284
Ratio	Large White	PC aa C36:5 / PC ae C32:2	6	ALGA0034982	28964755	A	C	0.071	-0.250848	0.0278208	1.46864e-18	1.47057e+10	4/104/679	14.2562
Ratio	Large White	PC aa C36:4 / PC aa C40:3	6	ALGA0034982	28964755	A	C	0.071	-0.24314	0.0213184	5.54135e-28	1.45701e+10	4/104/679	6.77724
Ratio	Large White	PC aa C42:5 / lysoPC a C16:0	6	ALGA0034982	28964755	A	C	0.071	0.881444	0.0920224	1.25971e-20	1.4353e+10	4/104/679	6.81928
Ratio	Large White	PC aa C34:3 / PC ae C38:1	6	ALGA0034982	28964755	A	C	0.071	-0.158708	0.019686	2.80471e-15	13682828267	4/104/679	11.1208
Ratio	Large White	PC aa C34:4 / PC aa C40:5	6	ALGA0034982	28964755	A	C	0.071	-0.0279418	0.0023091	5.06574e-31	1.2321e+10	4/104/679	4.30779
Ratio	Large White	PC aa C34:2 / PC aa C40:5	6	ALGA0034982	28964755	A	C	0.071	-0.578587	0.0478402	5.41887e-31	1.15181e+10	4/104/679	8.64561
Ratio	Large White	PC aa C36:0 / PC aa C38:5	6	ALGA0034982	28964755	A	C	0.071	0.016123	0.00166855	6.05104e-21	1.09059e+10	4/104/679	7.60217
Ratio	Large White	PC aa C32:2 / PC aa C36:2	6	ALGA0034982	28964755	A	C	0.071	-0.0120182	0.00119716	2.16945e-22	1.08928e+10	4/104/679	15.5644
Ratio	Large White	PC aa C34:2 / PC aa C36:0	6	ALGA0034982	28964755	A	C	0.071	-0.00641789	0.000759654	1.42949e-16	10326123759	4/104/679	6.87654
Ratio	Large White	PC aa C38:6 / lysoPC a C18:0	6	ALGA0034982	28964755	A	C	0.071	-0.142891	0.0139266	2.92159e-23	9.98485e+09	4/104/679	13.4604
Ratio	Large White	PC aa C36:0 / PC aa C38:6	6	ALGA0034982	28964755	A	C	0.071	0.0397241	0.00475031	2.80016e-16	8.25971e+09	4/104/679	6.47171
Ratio	Large White	PC aa C36:5 / PC aa C42:4	6	ALGA0034982	28964755	A	C	0.071	-0.225106	0.0251637	2.63401e-18	8.19944e+09	4/104/679	14.0461
Ratio	Large White	PC aa C38:5 / PC ae C42:4	6	ALGA0034982	28964755	A	C	0.071	-0.952524	0.0989385	8.24284e-21	8.00596e+09	4/104/679	14.1158
Ratio	Large White	PC aa C34:2 / PC aa C38:4	6	ALGA0034982	28964755	A	C	0.071	-0.197252	0.0219144	1.66951e-18	7.86634e+09	4/104/679	8.47928
Ratio	Large White	PC aa C36:4 / PC ae C36:1	6	ALGA0034982	28964755	A	C	0.071	-0.400808	0.035343	1.04691e-27	7.71209e+09	4/104/679	9.01753
Ratio	Large White	PC aa C36:4 / PC ae C42:4	6	ALGA0034982	28964755	A	C	0.071	-1.6227	0.143319	1.25161e-27	6.45073e+09	4/104/679	12.3983
Ratio	Large White	PC aa C36:3 / PC aa C40:2	6	ALGA0034982	28964755	A	C	0.071	-0.18827	0.0247604	8.24833e-14	5.53982e+09	4/104/679	7.70032
Ratio	Large White	PC aa C34:4 / PC aa C38:4	6	ALGA0034982	28964755	A	C	0.071	-0.413253	0.046137	2.39818e-18	5.47621e+09	4/104/679	7.77736
Ratio	Large White	PC aa C38:6 / PC aa C40:2	6	ALGA0034982	28964755	A	C	0.071	-0.13579	0.0163928	5.16408e-16	4.47873e+09	4/104/679	6.48663
Ratio	Large White	PC aa C36:3 / PC aa C38:3	6	ALGA0034982	28964755	A	C	0.071	-0.17381	0.0229785	1.09671e-13	3.96672e+09	4/104/679	7.89946
Ratio	Large White	PC aa C40:5 / PC ae C40:5	6	ALGA0034982	28964755	A	C	0.071	0.136012	0.011344	1.577e-30	3.95783e+09	4/104/679	7.06115
Ratio	Large White	PC aa C38:5 / PC ae C42:3	6	ALGA0034982	28964755	A	C	0.071	-1.24104	0.13033	2.04963e-20	3.21969e+09	4/104/679	7.15078
Ratio	Large White	PC aa C36:5 / PC aa C40:6	6	ALGA0034982	28964755	A	C	0.071	-0.221936	0.0251332	6.75788e-18	3.19588e+09	4/104/679	4.91946
Ratio	Large White	PC aa C38:5 / PC ae C38:5	6	ALGA0034982	28964755	A	C	0.071	-1.14396	0.120344	2.36226e-20	2.79359e+09	4/104/679	24.5435
Ratio	Large White	PC aa C36:4 / PC ae C38:6	6	ALGA0034982	28964755	A	C	0.071	-19.693	1.75394	3.15107e-27	2.56225e+09	4/104/679	9.55273
Ratio	Large White	PC aa C36:5 / PC ae C32:1	6	ALGA0034982	28964755	A	C	0.071	-0.234311	0.0267403	1.17216e-17	1.84253e+09	4/104/679	13.298
Ratio	Large White	PC aa C34:2 / PC aa C42:4	6	ALGA0034982	28964755	A	C	0.071	-0.350982	0.0427206	8.69766e-16	1.69713e+09	4/104/679	4.93368
Ratio	Large White	PC aa C36:4 / PC ae C30:0	6	ALGA0034982	28964755	A	C	0.071	-3.14464	0.281243	4.96036e-27	1.62767e+09	4/104/679	7.9441
Ratio	Large White	PC aa C32:2 / PC ae C38:2	6	ALGA0034982	28964755	A	C	0.071	-0.140265	0.0180323	2.31442e-14	1.60886e+09	4/104/679	7.11251
Ratio	Large White	PC ae C38:2 / lysoPC a C17:0	6	ALGA0034982	28964755	A	C	0.071	0.151225	0.0194806	2.59687e-14	1.43387e+09	4/104/679	4.46641
Ratio	Large White	PC aa C34:1 / PC aa C40:5	6	ALGA0034982	28964755	A	C	0.071	-0.461923	0.0388603	4.49405e-30	1.38884e+09	4/104/679	17.6283
Ratio	Large White	PC aa C38:6 / PC ae C38:1	6	ALGA0034982	28964755	A	C	0.071	-0.235946	0.0291186	2.05723e-15	1.12426e+09	4/104/679	4.56288
Ratio	Large White	PC aa C38:5 / PC aa C42:0	6	ALGA0034982	28964755	A	C	0.071	-0.842699	0.0896785	6.01226e-20	1.09762e+09	4/104/679	6.53797
Ratio	Large White	PC aa C36:0 / PC aa C36:3	6	ALGA0034982	28964755	A	C	0.071	0.0126072	0.00172445	6.56476e-13	1.04988e+09	4/104/679	14.304
Ratio	Large White	PC aa C38:6 / PC ae C38:2	6	ALGA0034982	28964755	A	C	0.071	-0.15116	0.018684	2.2629e-15	1.02208e+09	4/104/679	5.92501
Ratio	Large White	PC aa C36:4 / PC ae C42:2	6	ALGA0034982	28964755	A	C	0.071	-1.18902	0.106839	8.22731e-27	9.81345e+08	4/104/679	4.54981
Ratio	Large White	PC aa C34:3 / PC ae C32:2	6	ALGA0034982	28964755	A	C	0.071	-0.206083	0.0277748	3.05855e-13	9.73297e+08	4/104/679	6.03825
Ratio	Large White	PC aa C34:2 / lysoPC a C18:0	6	ALGA0034982	28964755	A	C	0.071	-0.365684	0.0365729	3.10859e-22	9.38418e+08	4/104/679	8.3291
Ratio	Large White	PC aa C32:3 / PC aa C36:4	6	ALGA0034982	28964755	A	C	0.071	12.1489	1.09225	8.74124e-27	9.23648e+08	4/104/679	6.53677
Ratio	Large White	PC aa C34:3 / PC aa C40:2	6	ALGA0034982	28964755	A	C	0.071	-0.142919	0.0193432	3.81074e-13	7.81182e+08	4/104/679	4.32158
Ratio	Large White	PC aa C36:0 / PC aa C36:5	6	ALGA0034982	28964755	A	C	0.071	0.107371	0.0124162	2.94955e-17	7.32226e+08	4/104/679	8.43006
Ratio	Large White	PC aa C42:4 / lysoPC a C16:0	6	ALGA0034982	28964755	A	C	0.071	0.301704	0.0327467	2.84888e-19	6.3466e+08	4/104/679	11.669
Ratio	Large White	PC aa C34:4 / PC ae C32:2	6	ALGA0034982	28964755	A	C	0.071	-0.113631	0.0162147	5.22157e-12	6.19213e+08	4/104/679	27.5962
Ratio	Large White	PC aa C38:5 / PC aa C42:2	6	ALGA0034982	28964755	A	C	0.071	-0.501832	0.0538069	1.09425e-19	6.03079e+08	4/104/679	13.5978
Ratio	Large White	PC aa C34:1 / PC aa C40:4	6	ALGA0034982	28964755	A	C	0.071	-0.269556	0.0328242	8.94481e-16	6.0058e+08	4/104/679	6.14679
Ratio	Large White	PC aa C34:4 / PC aa C40:2	6	ALGA0034982	28964755	A	C	0.071	-0.155578	0.0213526	7.79501e-13	5.86199e+08	4/104/679	15.2026
Ratio	Large White	PC aa C36:4 / PC ae C42:3	6	ALGA0034982	28964755	A	C	0.071	-2.26796	0.204793	1.39542e-26	5.78594e+08	4/104/679	5.0127
Ratio	Large White	PC aa C36:5 / PC ae C40:1	6	ALGA0034982	28964755	A	C	0.071	-0.206091	0.0239394	4.02043e-17	5.37191e+08	4/104/679	8.38042
Ratio	Large White	PC aa C36:5 / PC aa C38:3	6	ALGA0034982	28964755	A	C	0.071	-0.0937313	0.0108919	4.12542e-17	5.2352e+08	4/104/679	4.43813
Ratio	Large White	PC ae C38:2 / PC ae C38:3	6	ALGA0034982	28964755	A	C	0.071	0.0885839	0.0116202	7.1609e-14	5.19987e+08	4/104/679	15.4449
Ratio	Large White	PC aa C38:5 / PC ae C36:3	6	ALGA0034982	28964755	A	C	0.071	-0.243433	0.0262892	1.92456e-19	3.42894e+08	4/104/679	10.5364
Ratio	Large White	PC aa C36:4 / PC ae C38:0	6	ALGA0034982	28964755	A	C	0.071	-0.609975	0.0553732	2.45637e-26	3.2869e+08	4/104/679	7.35376
Ratio	Large White	PC aa C40:2 / lysoPC a C16:0	6	ALGA0034982	28964755	A	C	0.071	0.585563	0.0641675	5.94038e-19	3.04369e+08	4/104/679	9.8962
Ratio	Large White	PC aa C34:3 / PC aa C38:4	6	ALGA0034982	28964755	A	C	0.071	-0.159868	0.0186259	4.9337e-17	2.66188e+08	4/104/679	15.9162
Ratio	Large White	PC aa C38:3 / PC aa C38:5	6	ALGA0034982	28964755	A	C	0.071	0.258757	0.0280492	2.57937e-19	2.55845e+08	4/104/679	5.96621
Ratio	Large White	PC aa C36:4 / PC aa C38:3	6	ALGA0034982	28964755	A	C	0.071	-0.61903	0.0563328	3.18116e-26	2.53802e+08	4/104/679	9.95262
Ratio	Large White	PC aa C40:4 / lysoPC a C16:0	6	ALGA0034982	28964755	A	C	0.071	0.337184	0.0370384	7.13038e-19	2.53572e+08	4/104/679	7.5871
Ratio	Large White	PC aa C38:6 / PC ae C44:3	6	ALGA0034982	28964755	A	C	0.071	-1.28045	0.162007	9.18721e-15	2.51747e+08	4/104/679	21.6642
Ratio	Large White	PC aa C34:1 / PC aa C38:3	6	ALGA0034982	28964755	A	C	0.071	-0.213551	0.0297898	1.75431e-12	2.47978e+08	4/104/679	13.7533
Ratio	Large White	PC aa C36:4 / PC aa C42:0	6	ALGA0034982	28964755	A	C	0.071	-1.81817	0.165498	3.26568e-26	2.47233e+08	4/104/679	7.93058
Ratio	Large White	PC aa C36:5 / PC aa C42:1	6	ALGA0034982	28964755	A	C	0.071	-0.312283	0.0367097	9.02893e-17	2.39202e+08	4/104/679	7.79377
Ratio	Large White	PC aa C36:3 / PC ae C32:2	6	ALGA0034982	28964755	A	C	0.071	-0.267504	0.0378147	3.34117e-12	2.34498e+08	4/104/679	14.3724
Ratio	Large White	PC aa C34:1 / PC aa C36:4	6	ALGA0034982	28964755	A	C	0.071	0.113068	0.0103045	3.7121e-26	2.175e+08	4/104/679	15.968
Ratio	Large White	PC aa C34:2 / PC ae C40:3	6	ALGA0034982	28964755	A	C	0.071	-0.738805	0.0930189	6.8781e-15	2.1461e+08	4/104/679	8.37077
Ratio	Large White	PC aa C36:5 / PC ae C42:2	6	ALGA0034982	28964755	A	C	0.071	-0.264529	0.0312029	1.13562e-16	1.90182e+08	4/104/679	7.15426
Ratio	Large White	PC aa C34:4 / PC ae C40:3	6	ALGA0034982	28964755	A	C	0.071	-0.139382	0.0201943	1.05928e-11	1.88366e+08	4/104/679	4.45211
Ratio	Large White	PC aa C36:5 / PC ae C40:2	6	ALGA0034982	28964755	A	C	0.071	-0.377787	0.044569	1.14704e-16	1.88287e+08	4/104/679	6.21488
Ratio	Large White	PC ae C40:2 / lysoPC a C16:0	6	ALGA0034982	28964755	A	C	0.071	2.29248	0.253207	1.07896e-18	1.67574e+08	4/104/679	5.51582
Ratio	Large White	PC aa C34:3 / PC aa C36:0	6	ALGA0034982	28964755	A	C	0.071	-0.0514757	0.00718461	1.80146e-12	1.65248e+08	4/104/679	14.4526
Ratio	Large White	PC aa C38:6 / PC aa C40:4	6	ALGA0034982	28964755	A	C	0.071	-0.241532	0.030048	3.35599e-15	1.60074e+08	4/104/679	6.92164
Ratio	Large White	PC ae C38:1 / lysoPC a C17:0	6	ALGA0034982	28964755	A	C	0.071	0.183666	0.0246412	2.40847e-13	1.59339e+08	4/104/679	8.25584
Ratio	Large White	PC aa C36:3 / PC ae C40:3	6	ALGA0034982	28964755	A	C	0.071	-0.268557	0.0382821	4.9713e-12	1.57604e+08	4/104/679	14.7859
Ratio	Large White	PC aa C34:2 / PC aa C38:3	6	ALGA0034982	28964755	A	C	0.071	-0.331254	0.0420592	1.12896e-14	1.30749e+08	4/104/679	15.604
Ratio	Large White	PC aa C34:2 / PC ae C36:2	6	ALGA0034982	28964755	A	C	0.071	-0.14091	0.017899	1.15766e-14	1.27508e+08	4/104/679	19.114
Ratio	Large White	PC aa C32:2 / PC ae C38:1	6	ALGA0034982	28964755	A	C	0.071	-0.149674	0.0201973	3.26329e-13	1.17601e+08	4/104/679	17.0179
Ratio	Large White	PC aa C34:3 / PC ae C32:1	6	ALGA0034982	28964755	A	C	0.071	-0.196717	0.0276614	2.58918e-12	1.14974e+08	4/104/679	17.2309
Ratio	Large White	PC aa C38:6 / PC ae C42:2	6	ALGA0034982	28964755	A	C	0.071	-0.524698	0.0673784	2.16981e-14	1.06593e+08	4/104/679	12.7739
Ratio	Large White	PC ae C40:3 / lysoPC a C16:0	6	ALGA0034982	28964755	A	C	0.071	0.595268	0.0661674	1.73499e-18	1.04212e+08	4/104/679	7.30596
Ratio	Large White	PC aa C36:5 / PC aa C38:0	6	ALGA0034982	28964755	A	C	0.071	-0.368712	0.0440043	2.46085e-16	8.7764e+07	4/104/679	6.12946
Ratio	Large White	PC aa C36:4 / PC ae C34:3	6	ALGA0034982	28964755	A	C	0.071	-0.538125	0.0494737	9.26867e-26	8.71088e+07	4/104/679	9.33376
Ratio	Large White	PC aa C34:3 / PC aa C42:5	6	ALGA0034982	28964755	A	C	0.071	-0.237305	0.0310199	5.8998e-14	7.56968e+07	4/104/679	8.63869
Ratio	Large White	PC aa C36:5 / PC ae C40:4	6	ALGA0034982	28964755	A	C	0.071	-0.204587	0.0244951	3.0331e-16	7.12056e+07	4/104/679	10.7081
Ratio	Large White	PC aa C36:1 / lysoPC a C18:1	6	ALGA0034982	28964755	A	C	0.071	0.190977	0.0180954	1.94725e-24	7.10823e+07	4/104/679	8.60727
Ratio	Large White	PC aa C38:4 / lysoPC a C16:1	6	ALGA0034982	28964755	A	C	0.071	0.604808	0.0718686	1.85084e-16	7.09567e+07	4/104/679	6.71708
Ratio	Large White	PC aa C34:3 / PC aa C42:4	6	ALGA0034982	28964755	A	C	0.071	-0.134967	0.0191817	4.31518e-12	6.89862e+07	4/104/679	5.01662
Ratio	Large White	PC aa C38:5 / PC ae C40:1	6	ALGA0034982	28964755	A	C	0.071	-0.25275	0.0278742	9.62938e-19	6.85318e+07	4/104/679	5.66511
Ratio	Large White	PC aa C36:4 / SM C24:0	6	ALGA0034982	28964755	A	C	0.071	-0.944355	0.0870634	1.23572e-25	6.53371e+07	4/104/679	11.969
Ratio	Large White	PC ae C32:2 / lysoPC a C16:0	6	ALGA0034982	28964755	A	C	0.071	0.911747	0.102268	3.38112e-18	5.34754e+07	4/104/679	7.71767
Ratio	Large White	PC aa C36:5 / PC ae C38:6	6	ALGA0034982	28964755	A	C	0.071	-0.249872	0.030107	4.56371e-16	4.73241e+07	4/104/679	8.60068
Ratio	Large White	PC aa C34:2 / PC ae C40:2	6	ALGA0034982	28964755	A	C	0.071	-0.426517	0.0551352	3.16347e-14	4.6661e+07	4/104/679	6.00766
Ratio	Large White	PC aa C36:3 / PC aa C42:4	6	ALGA0034982	28964755	A	C	0.071	-0.180778	0.0264802	1.74005e-11	4.50274e+07	4/104/679	13.9873
Ratio	Large White	PC aa C38:5 / PC ae C38:0	6	ALGA0034982	28964755	A	C	0.071	-0.370266	0.041084	1.51987e-18	4.34195e+07	4/104/679	12.1571
Ratio	Large White	PC aa C34:4 / PC ae C32:1	6	ALGA0034982	28964755	A	C	0.071	-0.083286	0.0126229	7.67282e-11	4.21391e+07	4/104/679	3.81538
Ratio	Large White	PC aa C32:0 / PC aa C36:4	6	ALGA0034982	28964755	A	C	0.071	4.55086	0.421462	1.96703e-25	4.10458e+07	4/104/679	6.05374
Ratio	Large White	PC aa C36:4 / PC ae C34:0	6	ALGA0034982	28964755	A	C	0.071	-3.2106	0.297357	1.97952e-25	4.07868e+07	4/104/679	11.3147
Ratio	Large White	PC aa C36:3 / PC ae C32:1	6	ALGA0034982	28964755	A	C	0.071	-0.344637	0.0506118	1.95173e-11	4.01437e+07	4/104/679	22.1697
Ratio	Large White	PC aa C38:6 / PC ae C40:3	6	ALGA0034982	28964755	A	C	0.071	-0.172094	0.0224954	5.89594e-14	3.92279e+07	4/104/679	11.7286
Ratio	Large White	PC aa C36:3 / PC aa C42:5	6	ALGA0034982	28964755	A	C	0.071	-0.342426	0.0453282	1.17517e-13	3.80025e+07	4/104/679	7.89275
Ratio	Large White	PC aa C34:1 / PC aa C40:2	6	ALGA0034982	28964755	A	C	0.071	-0.214909	0.0312673	1.28163e-11	3.56533e+07	4/104/679	12.6167
Ratio	Large White	PC aa C36:5 / PC ae C36:5	6	ALGA0034982	28964755	A	C	0.071	-0.180229	0.0218197	6.19481e-16	3.48637e+07	4/104/679	8.64008
Ratio	Large White	PC aa C36:5 / PC ae C42:3	6	ALGA0034982	28964755	A	C	0.071	-0.341268	0.0413282	6.30993e-16	3.42276e+07	4/104/679	6.34322
Ratio	Large White	PC aa C34:4 / PC aa C42:4	6	ALGA0034982	28964755	A	C	0.071	-0.128052	0.0191298	4.14411e-11	3.1058e+07	4/104/679	4.34774
Ratio	Large White	PC aa C42:6 / lysoPC a C16:0	6	ALGA0034982	28964755	A	C	0.071	0.862987	0.0977027	6.62765e-18	2.72807e+07	4/104/679	15.1044
Ratio	Large White	PC aa C36:2 / lysoPC a C16:1	6	ALGA0034982	28964755	A	C	0.071	0.0534809	0.00572058	9.05226e-20	2.61054e+07	4/104/679	6.4686
Ratio	Large White	PC aa C36:5 / PC ae C42:5	6	ALGA0034982	28964755	A	C	0.071	-0.292209	0.0355663	8.68874e-16	2.48567e+07	4/104/679	19.2102
Ratio	Large White	PC aa C34:4 / PC aa C42:5	6	ALGA0034982	28964755	A	C	0.071	-0.191006	0.0254887	1.81136e-13	2.46552e+07	4/104/679	12.4203
Ratio	Large White	PC aa C36:4 / PC ae C38:3	6	ALGA0034982	28964755	A	C	0.071	-1.64733	0.153426	3.4963e-25	2.30925e+07	4/104/679	5.75785
Ratio	Large White	PC aa C38:6 / PC aa C42:0	6	ALGA0034982	28964755	A	C	0.071	-0.454472	0.0600495	1.06361e-13	2.17453e+07	4/104/679	16.5764
Ratio	Large White	PC aa C36:1 / lysoPC a C16:1	6	ALGA0034982	28964755	A	C	0.071	0.0503589	0.00483214	6.64146e-24	2.08411e+07	4/104/679	15.5321
Ratio	Large White	PC aa C34:3 / PC aa C40:5	6	ALGA0034982	28964755	A	C	0.071	-0.134335	0.0117206	3.1827e-28	1.96107e+07	4/104/679	9.01925
Ratio	Large White	PC aa C38:6 / PC ae C38:6	6	ALGA0034982	28964755	A	C	0.071	-0.587058	0.0777673	1.22206e-13	1.89259e+07	4/104/679	5.88525
Ratio	Large White	PC aa C38:5 / PC ae C34:3	6	ALGA0034982	28964755	A	C	0.071	-0.218065	0.0244852	3.64715e-18	1.80941e+07	4/104/679	6.52285
Ratio	Large White	PC aa C32:0 / PC ae C38:2	6	ALGA0034982	28964755	A	C	0.071	-0.0475098	0.00666615	2.33081e-12	1.59755e+07	4/104/679	7.23632
Ratio	Large White	PC aa C34:1 / PC aa C36:0	6	ALGA0034982	28964755	A	C	0.071	-0.00349333	0.000523411	4.70568e-11	1.46466e+07	4/104/679	9.1729
Ratio	Large White	PC aa C34:4 / PC ae C40:4	6	ALGA0034982	28964755	A	C	0.071	-0.15266	0.0235541	1.60813e-10	1.38487e+07	4/104/679	13.0052
Ratio	Large White	PC aa C38:5 / SM (OH) C14:1	6	ALGA0034982	28964755	A	C	0.071	-2.10601	0.237687	5.29132e-18	1.24717e+07	4/104/679	24.8478
Ratio	Large White	PC aa C32:0 / PC aa C36:1	6	ALGA0034982	28964755	A	C	0.071	-0.204826	0.0197661	1.14577e-23	1.20806e+07	4/104/679	6.76113
Ratio	Large White	PC aa C30:0 / PC aa C34:2	6	ALGA0034982	28964755	A	C	0.071	0.831709	0.110206	1.24016e-13	1.19026e+07	4/104/679	6.78438
Ratio	Large White	PC aa C34:2 / PC ae C36:3	6	ALGA0034982	28964755	A	C	0.071	-0.425268	0.0563731	1.26751e-13	1.16458e+07	4/104/679	5.08595
Ratio	Large White	PC aa C36:5 / SM C16:1	6	ALGA0034982	28964755	A	C	0.071	-0.14264	0.0175821	1.90852e-15	1.13163e+07	4/104/679	5.40412
Ratio	Large White	PC aa C36:3 / PC aa C40:4	6	ALGA0034982	28964755	A	C	0.071	-0.234341	0.0305172	4.78599e-14	1.12246e+07	4/104/679	19.6243
Ratio	Large White	PC aa C34:1 / PC aa C42:5	6	ALGA0034982	28964755	A	C	0.071	-0.300391	0.0407167	4.11628e-13	1.08495e+07	4/104/679	15.2209
Ratio	Large White	PC aa C34:2 / PC ae C40:4	6	ALGA0034982	28964755	A	C	0.071	-0.590396	0.0784273	1.41961e-13	1.03979e+07	4/104/679	7.1931
Ratio	Large White	PC aa C32:1 / PC aa C36:1	6	ALGA0034982	28964755	A	C	0.071	-0.0328363	0.00317437	1.35507e-23	1.02146e+07	4/104/679	18.3678
Ratio	Large White	PC aa C36:5 / SM C16:0	6	ALGA0034982	28964755	A	C	0.071	-0.0256189	0.00316515	2.20011e-15	9.81651e+06	4/104/679	19.8832
Ratio	Large White	PC aa C36:3 / PC aa C38:4	6	ALGA0034982	28964755	A	C	0.071	-0.200295	0.0245859	1.47415e-15	8.9088e+06	4/104/679	10.0184
Ratio	Large White	PC aa C40:5 / PC ae C38:4	6	ALGA0034982	28964755	A	C	0.071	0.160458	0.0141084	7.59117e-28	8.22206e+06	4/104/679	7.06663
Ratio	Large White	PC aa C34:3 / PC ae C40:3	6	ALGA0034982	28964755	A	C	0.071	-0.158406	0.0236243	3.84952e-11	7.73312e+06	4/104/679	9.35515
Ratio	Large White	PC aa C38:6 / PC ae C36:5	6	ALGA0034982	28964755	A	C	0.071	-0.183525	0.024737	3.07443e-13	7.52288e+06	4/104/679	6.92179
Ratio	Large White	PC aa C36:5 / PC aa C42:6	6	ALGA0034982	28964755	A	C	0.071	-0.267547	0.0332416	3.10376e-15	6.95846e+06	4/104/679	11.8763
Ratio	Large White	PC aa C36:4 / PC ae C38:5	6	ALGA0034982	28964755	A	C	0.071	-2.90062	0.27357	1.23326e-24	6.54674e+06	4/104/679	14.0074
Ratio	Large White	PC aa C34:3 / PC aa C42:1	6	ALGA0034982	28964755	A	C	0.071	-0.220332	0.033022	4.7625e-11	6.25067e+06	4/104/679	9.12452
Ratio	Large White	PC aa C34:4 / PC aa C42:1	6	ALGA0034982	28964755	A	C	0.071	-0.148093	0.0233359	3.7342e-10	5.78449e+06	4/104/679	9.56888
Ratio	Large White	PC aa C38:6 / PC ae C32:2	6	ALGA0034982	28964755	A	C	0.071	-0.154191	0.0208946	4.06206e-13	5.69379e+06	4/104/679	8.65241
Ratio	Large White	lysoPC a C16:0 / SM C16:0	6	ALGA0034982	28964755	A	C	0.071	-0.112898	0.0130864	3.47406e-17	5.20448e+06	4/104/679	9.99555
Ratio	Large White	PC aa C36:5 / PC aa C40:3	6	ALGA0034982	28964755	A	C	0.071	-0.134224	0.0167872	4.62402e-15	4.67069e+06	4/104/679	6.42057
Ratio	Large White	PC ae C42:5 / lysoPC a C16:0	6	ALGA0034982	28964755	A	C	0.071	1.61512	0.187546	3.92487e-17	4.6067e+06	4/104/679	8.8889
Ratio	Large White	PC aa C36:4 / PC ae C40:1	6	ALGA0034982	28964755	A	C	0.071	-0.640211	0.0605998	1.76274e-24	4.58027e+06	4/104/679	8.34728
Ratio	Large White	PC aa C34:4 / PC aa C40:4	6	ALGA0034982	28964755	A	C	0.071	-0.103875	0.0137637	1.2387e-13	4.33686e+06	4/104/679	13.2967
Ratio	Large White	PC aa C36:3 / PC aa C40:5	6	ALGA0034982	28964755	A	C	0.071	-0.294163	0.0260212	1.48617e-27	4.19974e+06	4/104/679	13.2687
Ratio	Large White	PC aa C34:1 / PC aa C38:4	6	ALGA0034982	28964755	A	C	0.071	-0.185418	0.0230423	3.14447e-15	4.17652e+06	4/104/679	10.7102
Ratio	Large White	PC aa C36:3 / PC ae C40:4	6	ALGA0034982	28964755	A	C	0.071	-0.188158	0.0291965	2.02529e-10	3.86857e+06	4/104/679	12.0461
Ratio	Large White	PC aa C36:2 / PC ae C34:1	6	ALGA0034982	28964755	A	C	0.071	0.157813	0.0173097	6.37779e-19	3.70525e+06	4/104/679	15.6573
Ratio	Large White	lysoPC a C17:0 / lysoPC a C18:0	6	ALGA0034982	28964755	A	C	0.071	-0.054667	0.00584003	8.1824e-20	3.56516e+06	4/104/679	12.3073
Ratio	Large White	PC aa C34:3 / PC aa C40:4	6	ALGA0034982	28964755	A	C	0.071	-0.18159	0.0241549	1.52696e-13	3.51816e+06	4/104/679	15.3101
Ratio	Large White	PC aa C36:1 / PC ae C34:1	6	ALGA0034982	28964755	A	C	0.071	0.105556	0.0103224	3.99875e-23	3.46146e+06	4/104/679	13.3025
Ratio	Large White	PC aa C38:5 / PC ae C42:0	6	ALGA0034982	28964755	A	C	0.071	-4.04798	0.465743	2.07645e-17	3.17811e+06	4/104/679	9.0148
Ratio	Large White	PC aa C34:2 / PC aa C42:1	6	ALGA0034982	28964755	A	C	0.071	-0.710011	0.096502	4.73969e-13	3.11435e+06	4/104/679	8.30799
Ratio	Large White	PC ae C36:2 / PC ae C38:1	6	ALGA0034982	28964755	A	C	0.071	-0.084282	0.0122597	1.26932e-11	3.02339e+06	4/104/679	9.75829
Ratio	Large White	PC aa C38:5 / PC ae C34:2	6	ALGA0034982	28964755	A	C	0.071	-0.209209	0.0240963	2.2367e-17	2.95041e+06	4/104/679	8.36587
Ratio	Large White	PC aa C34:2 / PC ae C34:1	6	ALGA0034982	28964755	A	C	0.071	-0.248853	0.0338657	5.0558e-13	2.91963e+06	4/104/679	8.38772
Ratio	Large White	PC aa C36:4 / PC ae C44:4	6	ALGA0034982	28964755	A	C	0.071	-2.06728	0.196704	2.94024e-24	2.74598e+06	4/104/679	9.22986
Ratio	Large White	PC aa C30:0 / PC aa C38:5	6	ALGA0034982	28964755	A	C	0.071	1.94705	0.224509	2.41852e-17	2.7286e+06	4/104/679	14.8438
Ratio	Large White	PC aa C34:2 / PC aa C42:2	6	ALGA0034982	28964755	A	C	0.071	-0.234616	0.0319748	5.44919e-13	2.70886e+06	4/104/679	8.51071
Ratio	Large White	PC aa C40:5 / lysoPC a C16:1	6	ALGA0034982	28964755	A	C	0.071	0.154335	0.0137164	2.49358e-27	2.50303e+06	4/104/679	25.238
Ratio	Large White	PC aa C34:4 / PC aa C36:0	6	ALGA0034982	28964755	A	C	0.071	-0.326805	0.051214	3.00614e-10	2.29271e+06	4/104/679	7.13927
Ratio	Large White	PC aa C34:1 / PC ae C32:1	6	ALGA0034982	28964755	A	C	0.071	-0.894214	0.147666	2.16958e-09	2.1828e+06	4/104/679	7.30013
Ratio	Large White	PC aa C34:2 / SM C16:0	6	ALGA0034982	28964755	A	C	0.071	-0.205333	0.0281246	7.03833e-13	2.09724e+06	4/104/679	13.359
Ratio	Large White	PC aa C32:3 / PC aa C38:5	6	ALGA0034982	28964755	A	C	0.071	6.17887	0.715652	3.29213e-17	2.00454e+06	4/104/679	8.42088
Ratio	Large White	PC aa C36:3 / PC aa C42:1	6	ALGA0034982	28964755	A	C	0.071	-0.361047	0.0570051	4.03517e-10	1.94167e+06	4/104/679	5.73156
Ratio	Large White	PC aa C38:5 / PC ae C44:3	6	ALGA0034982	28964755	A	C	0.071	-2.42523	0.281044	3.41379e-17	1.9331e+06	4/104/679	11.3518
Ratio	Large White	PC aa C36:4 / PC ae C38:4	6	ALGA0034982	28964755	A	C	0.071	-0.785421	0.0750123	4.22426e-24	1.9113e+06	4/104/679	13.791
Ratio	Large White	PC aa C38:6 / PC ae C42:5	6	ALGA0034982	28964755	A	C	0.071	-0.471456	0.0652837	1.21809e-12	1.89875e+06	4/104/679	4.84992
Ratio	Large White	PC aa C38:5 / PC ae C40:6	6	ALGA0034982	28964755	A	C	0.071	-4.56025	0.528638	3.49524e-17	1.88805e+06	4/104/679	4.39431
Ratio	Large White	PC aa C34:1 / PC ae C32:2	6	ALGA0034982	28964755	A	C	0.071	-0.82181	0.137404	3.37131e-09	1.73317e+06	4/104/679	9.23165
Ratio	Large White	PC aa C38:5 / PC ae C34:1	6	ALGA0034982	28964755	A	C	0.071	-0.345781	0.040164	4.00855e-17	1.64628e+06	4/104/679	13.5846
Ratio	Large White	PC aa C34:3 / PC aa C38:0	6	ALGA0034982	28964755	A	C	0.071	-0.217305	0.0336313	1.82204e-10	1.63381e+06	4/104/679	15.6871
Ratio	Large White	PC aa C36:4 / PC ae C42:0	6	ALGA0034982	28964755	A	C	0.071	-3.37891	0.323315	5.07125e-24	1.59208e+06	4/104/679	13.4083
Ratio	Large White	PC aa C34:2 / PC ae C42:5	6	ALGA0034982	28964755	A	C	0.071	-0.722999	0.0996654	9.7239e-13	1.51802e+06	4/104/679	4.14566
Ratio	Large White	PC aa C34:4 / PC ae C42:4	6	ALGA0034982	28964755	A	C	0.071	-0.125683	0.0207745	2.24508e-09	1.44015e+06	4/104/679	6.7435
Ratio	Large White	PC aa C36:5 / PC ae C42:4	6	ALGA0034982	28964755	A	C	0.071	-0.234205	0.0298909	1.52397e-14	1.41718e+06	4/104/679	4.44401
Ratio	Large White	PC aa C36:3 / lysoPC a C18:0	6	ALGA0034982	28964755	A	C	0.071	-0.203765	0.0220563	2.30581e-19	1.26513e+06	4/104/679	20.6784
Ratio	Large White	PC aa C36:0 / lysoPC a C16:0	6	ALGA0034982	28964755	A	C	0.071	0.010536	0.00124768	1.47545e-16	1.22543e+06	4/104/679	6.02537
Ratio	Large White	PC aa C36:5 / PC ae C36:3	6	ALGA0034982	28964755	A	C	0.071	-0.16624	0.0212853	1.83568e-14	1.17653e+06	4/104/679	6.84361
Ratio	Large White	PC aa C34:3 / PC ae C40:4	6	ALGA0034982	28964755	A	C	0.071	-0.155923	0.0243978	2.83051e-10	1.05171e+06	4/104/679	15.4046
Ratio	Large White	PC aa C34:1 / PC ae C40:3	6	ALGA0034982	28964755	A	C	0.071	-0.350184	0.0576938	1.99562e-09	999848	4/104/679	9.52737
Ratio	Large White	PC aa C30:0 / PC aa C36:5	6	ALGA0034982	28964755	A	C	0.071	0.218932	0.0281212	2.2026e-14	980540	4/104/679	4.47189
Ratio	Large White	PC aa C38:5 / PC ae C36:4	6	ALGA0034982	28964755	A	C	0.071	-0.636126	0.0744966	7.00176e-17	942504	4/104/679	20.2506
Ratio	Large White	PC aa C34:2 / PC ae C42:4	6	ALGA0034982	28964755	A	C	0.071	-0.221808	0.0308952	1.62925e-12	906003	4/104/679	14.231
Ratio	Large White	PC aa C38:6 / PC ae C32:1	6	ALGA0034982	28964755	A	C	0.071	-0.237145	0.0333841	2.73541e-12	845522	4/104/679	12.0204
Ratio	Large White	PC aa C34:4 / PC aa C38:0	6	ALGA0034982	28964755	A	C	0.071	-0.113817	0.0191219	3.99062e-09	810215	4/104/679	7.67828
Ratio	Large White	PC aa C42:5 / lysoPC a C16:1	6	ALGA0034982	28964755	A	C	0.071	0.138029	0.0197301	5.66123e-12	788866	4/104/679	10.8551
Ratio	Large White	PC aa C36:5 / PC aa C42:2	6	ALGA0034982	28964755	A	C	0.071	-0.196865	0.0253986	2.83141e-14	762779	4/104/679	5.91846
Ratio	Large White	PC aa C36:5 / PC aa C42:0	6	ALGA0034982	28964755	A	C	0.071	-0.270514	0.0349805	3.22382e-14	669932	4/104/679	17.2495
Ratio	Large White	PC aa C36:5 / PC ae C38:0	6	ALGA0034982	28964755	A	C	0.071	-0.201723	0.0260873	3.23902e-14	666788	4/104/679	5.35683
Ratio	Large White	PC aa C38:6 / PC ae C40:4	6	ALGA0034982	28964755	A	C	0.071	-0.223729	0.0316612	3.52042e-12	656982	4/104/679	8.19028
Ratio	Large White	PC aa C34:2 / SM C16:1	6	ALGA0034982	28964755	A	C	0.071	-0.810555	0.113646	2.24851e-12	656482	4/104/679	7.60518
Ratio	Large White	PC aa C38:5 / PC ae C38:4	6	ALGA0034982	28964755	A	C	0.071	-0.2785	0.032809	1.04301e-16	632704	4/104/679	10.0881
Ratio	Large White	PC aa C32:2 / PC aa C36:1	6	ALGA0034982	28964755	A	C	0.071	-0.0209179	0.00208463	2.25938e-22	612626	4/104/679	5.97847
Ratio	Large White	PC aa C34:2 / PC aa C42:6	6	ALGA0034982	28964755	A	C	0.071	-0.409679	0.0575286	2.42358e-12	609060	4/104/679	14.3723
Ratio	Large White	PC aa C34:1 / PC aa C42:4	6	ALGA0034982	28964755	A	C	0.071	-0.141592	0.0234204	2.30155e-09	559223	4/104/679	15.344
Ratio	Large White	PC aa C38:5 / SM C24:0	6	ALGA0034982	28964755	A	C	0.071	-0.45622	0.0538874	1.24368e-16	530616	4/104/679	8.741
Ratio	Large White	PC ae C40:4 / lysoPC a C16:0	6	ALGA0034982	28964755	A	C	0.071	0.374295	0.0449177	3.52163e-16	513417	4/104/679	22.6684
Ratio	Large White	PC aa C34:2 / PC ae C30:0	6	ALGA0034982	28964755	A	C	0.071	-0.872038	0.122954	2.95014e-12	500351	4/104/679	5.70762
Ratio	Large White	PC aa C32:2 / PC ae C32:2	6	ALGA0034982	28964755	A	C	0.071	-0.124121	0.0215297	1.1739e-08	497745	4/104/679	13.8576
Ratio	Large White	PC aa C34:2 / PC ae C34:2	6	ALGA0034982	28964755	A	C	0.071	-0.367968	0.0519003	3.00059e-12	491939	4/104/679	6.75201
Ratio	Large White	PC aa C38:5 / PC ae C44:4	6	ALGA0034982	28964755	A	C	0.071	-3.48647	0.412302	1.34604e-16	490269	4/104/679	7.83636
Ratio	Large White	PC aa C34:4 / lysoPC a C18:0	6	ALGA0034982	28964755	A	C	0.071	-0.141219	0.0154915	6.43695e-19	453190	4/104/679	18.6778
Ratio	Large White	lysoPC a C16:0 / SM C16:1	6	ALGA0034982	28964755	A	C	0.071	-0.566209	0.0681326	4.19403e-16	431105	4/104/679	6.59376
Ratio	Large White	PC aa C34:4 / PC ae C40:2	6	ALGA0034982	28964755	A	C	0.071	-0.0913193	0.0156525	7.90986e-09	408763	4/104/679	12.0993
Ratio	Large White	PC aa C36:3 / PC ae C40:2	6	ALGA0034982	28964755	A	C	0.071	-0.296263	0.0488414	2.04238e-09	383620	4/104/679	4.31848
Ratio	Large White	PC aa C34:2 / PC aa C40:6	6	ALGA0034982	28964755	A	C	0.071	-0.361451	0.0512661	3.91877e-12	376676	4/104/679	9.36296
Ratio	Large White	PC aa C36:1 / PC ae C36:2	6	ALGA0034982	28964755	A	C	0.071	0.0931388	0.00933332	3.70407e-22	373685	4/104/679	5.94107
Ratio	Large White	PC aa C38:6 / PC ae C44:4	6	ALGA0034982	28964755	A	C	0.071	-1.09674	0.157222	6.47835e-12	357013	4/104/679	8.14213
Ratio	Large White	PC aa C36:3 / PC ae C36:3	6	ALGA0034982	28964755	A	C	0.071	-0.189214	0.0312583	2.20058e-09	356042	4/104/679	9.325
Ratio	Large White	PC aa C34:2 / PC aa C38:0	6	ALGA0034982	28964755	A	C	0.071	-0.765296	0.108701	4.19639e-12	351756	4/104/679	8.31526
Ratio	Large White	PC aa C34:4 / PC aa C38:3	6	ALGA0034982	28964755	A	C	0.071	-0.0907822	0.0148219	1.43582e-09	302985	4/104/679	7.97328
Ratio	Large White	PC aa C36:5 / SM (OH) C14:1	6	ALGA0034982	28964755	A	C	0.071	-0.194954	0.0255872	7.37617e-14	292799	4/104/679	7.42088
Ratio	Large White	PC aa C36:3 / PC aa C40:3	6	ALGA0034982	28964755	A	C	0.071	-0.0587416	0.00976686	2.76943e-09	282910	4/104/679	13.2142
Ratio	Large White	PC aa C34:3 / PC aa C38:3	6	ALGA0034982	28964755	A	C	0.071	-0.128885	0.0208721	1.06211e-09	280280	4/104/679	7.51289
Ratio	Large White	PC aa C40:6 / lysoPC a C16:0	6	ALGA0034982	28964755	A	C	0.071	0.347525	0.042131	6.75412e-16	267699	4/104/679	7.62863
Ratio	Large White	PC aa C34:3 / PC aa C40:6	6	ALGA0034982	28964755	A	C	0.071	-0.201082	0.029666	2.3949e-11	254896	4/104/679	6.35951
Ratio	Large White	PC ae C32:1 / lysoPC a C16:0	6	ALGA0034982	28964755	A	C	0.071	0.807986	0.0980437	7.16038e-16	252510	4/104/679	4.52432
Ratio	Large White	PC ae C38:2 / lysoPC a C16:1	6	ALGA0034982	28964755	A	C	0.071	0.134533	0.0207167	1.48483e-10	250774	4/104/679	6.26761
Ratio	Large White	PC aa C38:6 / PC aa C42:2	6	ALGA0034982	28964755	A	C	0.071	-0.0696527	0.0100693	9.56656e-12	241764	4/104/679	6.07132
Ratio	Large White	PC aa C32:3 / PC aa C36:5	6	ALGA0034982	28964755	A	C	0.071	0.711519	0.0937547	9.15653e-14	235869	4/104/679	9.8247
Ratio	Large White	PC aa C34:1 / PC ae C40:4	6	ALGA0034982	28964755	A	C	0.071	-0.195143	0.0336612	9.7714e-09	227916	4/104/679	12.9018
Ratio	Large White	PC aa C34:3 / PC ae C36:3	6	ALGA0034982	28964755	A	C	0.071	-0.10812	0.0176261	1.35863e-09	219109	4/104/679	6.70008
Ratio	Large White	PC aa C34:3 / PC ae C40:2	6	ALGA0034982	28964755	A	C	0.071	-0.212281	0.0346289	1.39086e-09	214031	4/104/679	6.66025
Ratio	Large White	PC aa C36:3 / PC ae C42:4	6	ALGA0034982	28964755	A	C	0.071	-0.138489	0.0232281	3.76486e-09	208108	4/104/679	16.8632
Ratio	Large White	PC aa C36:3 / PC aa C38:0	6	ALGA0034982	28964755	A	C	0.071	-0.28099	0.0471468	3.81444e-09	205403	4/104/679	9.73574
Ratio	Large White	PC ae C38:1 / lysoPC a C16:1	6	ALGA0034982	28964755	A	C	0.071	0.1278	0.0198226	1.99191e-10	192661	4/104/679	11.4739
Ratio	Large White	PC aa C34:3 / PC ae C42:4	6	ALGA0034982	28964755	A	C	0.071	-0.131402	0.0215171	1.59914e-09	186156	4/104/679	14.3841
Ratio	Large White	PC aa C32:0 / PC aa C34:2	6	ALGA0034982	28964755	A	C	0.071	4.15857	0.599721	8.55367e-12	172570	4/104/679	11.3712
Ratio	Large White	PC aa C34:1 / PC ae C40:2	6	ALGA0034982	28964755	A	C	0.071	-0.162975	0.0294589	4.31169e-08	168507	4/104/679	4.55734
Ratio	Large White	PC aa C36:4 / PC ae C36:4	6	ALGA0034982	28964755	A	C	0.071	-4.2964	0.421363	5.22748e-23	154450	4/104/679	9.43315
Ratio	Large White	PC aa C32:2 / PC ae C32:1	6	ALGA0034982	28964755	A	C	0.071	-0.0934483	0.0167251	3.18335e-08	148767	4/104/679	16.1242
Ratio	Large White	PC aa C36:5 / PC ae C34:3	6	ALGA0034982	28964755	A	C	0.071	-0.186768	0.0248296	1.48101e-13	145828	4/104/679	7.89922
Single	Large White	PC aa C40:5	6	MARC0019292	28970880	G	A	0.201	0.289024	0.0439597	8.89934e-11	-	24/268/495	2.69622
Single	Large White	PC aa C36:1	6	MARC0019292	28970880	G	A	0.201	0.350737	0.0620522	2.21772e-08	-	24/268/495	2.22279
Single	Large White	PC aa C36:2	6	MARC0019292	28970880	G	A	0.201	0.84671	0.172019	1.04394e-06	-	24/268/495	2.98646
Single	Large White	lysoPC a C18:0	6	MARC0019292	28970880	G	A	0.201	1.15189	0.234025	1.04439e-06	-	24/268/495	5.20668
Ratio	Large White	PC aa C38:4 / PC aa C38:5	6	MARC0019292	28970880	G	A	0.201	0.00402574	0.000393244	3.60548e-23	1.2446e+17	24/268/495	6.64858
Ratio	Large White	PC aa C38:5 / PC aa C40:5	6	MARC0019292	28970880	G	A	0.201	-0.225217	0.0201627	5.53382e-27	1.60817e+16	24/268/495	5.46457
Ratio	Large White	lysoPC a C16:0 / lysoPC a C18:0	6	MARC0019292	28970880	G	A	0.201	-0.193077	0.0191648	1.57388e-22	6635741030310000	24/268/495	7.04011
Ratio	Large White	PC aa C34:2 / PC aa C36:2	6	MARC0019292	28970880	G	A	0.201	-0.0847752	0.00841547	1.58592e-22	6582549138790000	24/268/495	6.05668
Ratio	Large White	PC aa C36:2 / PC aa C36:3	6	MARC0019292	28970880	G	A	0.201	0.0157285	0.00158248	5.29743e-22	1970648031220000	24/268/495	9.91548
Ratio	Large White	PC aa C36:4 / PC aa C38:4	6	MARC0019292	28970880	G	A	0.201	-0.0375368	0.00388588	6.21894e-21	570315153184000	24/268/495	10.5998
Ratio	Large White	PC aa C38:6 / PC aa C40:6	6	MARC0019292	28970880	G	A	0.201	-0.11168	0.0124002	1.59931e-18	43646208822000	24/268/495	11.2728
Ratio	Large White	PC aa C36:2 / PC aa C36:4	6	MARC0019292	28970880	G	A	0.201	0.0180283	0.00190787	3.83356e-20	27231536021700	24/268/495	9.34356
Ratio	Large White	PC aa C36:2 / lysoPC a C16:0	6	MARC0019292	28970880	G	A	0.201	0.0647314	0.00695498	1.28925e-19	8.09724e+12	24/268/495	5.81962
Ratio	Large White	PC aa C36:2 / PC aa C36:5	6	MARC0019292	28970880	G	A	0.201	0.0057397	0.000616758	1.29975e-19	8.03184e+12	24/268/495	8.54576
Ratio	Large White	PC aa C36:1 / PC aa C36:5	6	MARC0019292	28970880	G	A	0.201	0.00434173	0.000451462	9.02288e-21	2457890094260	24/268/495	7.3328
Ratio	Large White	PC aa C34:1 / PC aa C36:1	6	MARC0019292	28970880	G	A	0.201	-0.276481	0.0287871	1.00748e-20	2201265140540	24/268/495	4.26365
Ratio	Large White	PC aa C36:1 / PC aa C36:4	6	MARC0019292	28970880	G	A	0.201	0.242935	0.0253649	1.27054e-20	1745494442530	24/268/495	8.42895
Ratio	Large White	PC aa C36:4 / PC aa C40:5	6	MARC0019292	28970880	G	A	0.201	-0.451785	0.0451812	3.09098e-22	287913437106	24/268/495	4.16204
Ratio	Large White	PC aa C34:3 / PC aa C36:2	6	MARC0019292	28970880	G	A	0.201	-0.0046081	0.000537354	5.24104e-17	1.99185e+10	24/268/495	6.13713
Ratio	Large White	PC aa C36:5 / PC aa C38:4	6	MARC0019292	28970880	G	A	0.201	-0.0442608	0.0053038	3.20378e-16	1.40066e+10	24/268/495	6.6878
Ratio	Large White	PC aa C36:2 / PC aa C38:5	6	MARC0019292	28970880	G	A	0.201	0.02154	0.00253262	9.15852e-17	1.13985e+10	24/268/495	4.96304
Ratio	Large White	PC aa C34:2 / PC ae C38:2	6	MARC0019292	28970880	G	A	0.201	-1.1248	0.1512	2.66779e-13	5.95399e+09	24/268/495	5.02549
Ratio	Large White	PC aa C36:1 / PC aa C38:5	6	MARC0019292	28970880	G	A	0.201	0.0650004	0.00730232	3.78897e-18	5.85311e+09	24/268/495	9.37968
Ratio	Large White	PC aa C36:1 / lysoPC a C16:0	6	MARC0019292	28970880	G	A	0.201	0.143892	0.016219	4.82259e-18	4.59862e+09	24/268/495	9.65527
Ratio	Large White	PC aa C38:4 / lysoPC a C16:0	6	MARC0019292	28970880	G	A	0.201	0.111257	0.0138082	2.9067e-15	1.54381e+09	24/268/495	4.95889
Ratio	Large White	PC aa C36:4 / lysoPC a C18:0	6	MARC0019292	28970880	G	A	0.201	-0.207338	0.0251705	7.36963e-16	1.41715e+09	24/268/495	5.52325
Ratio	Large White	PC aa C36:3 / PC ae C38:2	6	MARC0019292	28970880	G	A	0.201	-0.203178	0.0290528	5.75672e-12	8.5415e+08	24/268/495	10.5161
Ratio	Large White	PC aa C34:1 / PC aa C36:2	6	MARC0019292	28970880	G	A	0.201	-0.066231	0.00812217	1.3912e-15	7.50384e+08	24/268/495	4.88568
Ratio	Large White	PC aa C36:4 / PC ae C38:1	6	MARC0019292	28970880	G	A	0.201	-0.646715	0.0819508	1.00561e-14	3.52699e+08	24/268/495	7.15784
Ratio	Large White	PC aa C34:2 / PC aa C36:1	6	MARC0019292	28970880	G	A	0.201	-0.229999	0.0270228	8.71691e-17	2.54416e+08	24/268/495	4.24843
Ratio	Large White	PC aa C36:5 / PC aa C40:5	6	MARC0019292	28970880	G	A	0.201	-0.0317723	0.00346442	4.06113e-19	2.19135e+08	24/268/495	10.4912
Ratio	Large White	PC aa C36:4 / PC aa C42:4	6	MARC0019292	28970880	G	A	0.201	-6.05535	0.77738	2.13668e-14	1.65994e+08	24/268/495	4.27208
Ratio	Large White	PC aa C38:5 / PC aa C42:5	6	MARC0019292	28970880	G	A	0.201	-1.07944	0.154816	6.62798e-12	1.2712e+08	24/268/495	11.4234
Ratio	Large White	PC aa C38:5 / PC aa C40:4	6	MARC0019292	28970880	G	A	0.201	-0.21332	0.0299475	2.39334e-12	1.02732e+08	24/268/495	5.4946
Ratio	Large White	PC aa C36:1 / PC aa C36:3	6	MARC0019292	28970880	G	A	0.201	0.101811	0.012181	2.8928e-16	7.66635e+07	24/268/495	7.62037
Ratio	Large White	PC aa C40:5 / lysoPC a C16:0	6	MARC0019292	28970880	G	A	0.201	0.219286	0.0242964	1.36468e-18	6.52121e+07	24/268/495	6.01479
Ratio	Large White	PC aa C36:5 / PC ae C38:1	6	MARC0019292	28970880	G	A	0.201	-0.109499	0.0152647	1.69779e-12	6.12711e+07	24/268/495	4.28422
Ratio	Large White	PC aa C34:2 / PC ae C38:1	6	MARC0019292	28970880	G	A	0.201	-0.0944782	0.0139158	2.22693e-11	5.3709e+07	24/268/495	3.98818
Ratio	Large White	PC aa C38:5 / PC aa C40:6	6	MARC0019292	28970880	G	A	0.201	-0.227757	0.0316597	1.47466e-12	4.73353e+07	24/268/495	11.7516
Ratio	Large White	PC aa C36:4 / PC aa C42:5	6	MARC0019292	28970880	G	A	0.201	-2.28815	0.301167	8.61711e-14	4.11595e+07	24/268/495	5.85083
Ratio	Large White	PC aa C38:5 / PC aa C42:4	6	MARC0019292	28970880	G	A	0.201	-1.57495	0.233537	2.99476e-11	4.02222e+07	24/268/495	8.15303
Ratio	Large White	PC aa C36:4 / PC ae C38:2	6	MARC0019292	28970880	G	A	0.201	-2.71404	0.359513	1.21944e-13	2.9085e+07	24/268/495	5.5807
Ratio	Large White	PC aa C36:4 / PC aa C40:4	6	MARC0019292	28970880	G	A	0.201	-0.409464	0.0546921	1.9042e-13	1.8626e+07	24/268/495	9.09186
Ratio	Large White	PC aa C36:4 / PC aa C40:6	6	MARC0019292	28970880	G	A	0.201	-0.280912	0.0375234	1.90963e-13	1.85731e+07	24/268/495	8.4176
Ratio	Large White	PC aa C36:5 / PC ae C40:1	6	MARC0019292	28970880	G	A	0.201	-0.112614	0.0161487	6.57519e-12	1.58209e+07	24/268/495	4.02347
Ratio	Large White	PC aa C38:5 / PC ae C38:1	6	MARC0019292	28970880	G	A	0.201	-0.241677	0.0366796	8.13347e-11	1.47054e+07	24/268/495	6.32681
Ratio	Large White	PC aa C32:0 / PC aa C36:2	6	MARC0019292	28970880	G	A	0.201	-0.0816261	0.0108156	1.23832e-13	8.43026e+06	24/268/495	5.46483
Ratio	Large White	PC aa C36:5 / lysoPC a C18:0	6	MARC0019292	28970880	G	A	0.201	-0.0360775	0.0048037	1.60953e-13	6.48878e+06	24/268/495	10.439
Ratio	Large White	PC aa C36:5 / PC ae C38:2	6	MARC0019292	28970880	G	A	0.201	-0.107089	0.0157016	1.81761e-11	5.72321e+06	24/268/495	6.83343
Ratio	Large White	PC aa C36:3 / PC ae C38:1	6	MARC0019292	28970880	G	A	0.201	-0.0772077	0.0120486	2.5438e-10	4.70188e+06	24/268/495	4.60274
Ratio	Large White	PC aa C36:4 / PC aa C40:2	6	MARC0019292	28970880	G	A	0.201	-0.837499	0.114872	7.55008e-13	4.69764e+06	24/268/495	5.87257
Ratio	Large White	PC aa C38:5 / PC aa C40:2	6	MARC0019292	28970880	G	A	0.201	-0.128939	0.0202796	3.46831e-10	3.47304e+06	24/268/495	6.23814
Ratio	Large White	PC aa C36:5 / PC aa C40:6	6	MARC0019292	28970880	G	A	0.201	-0.115515	0.017077	2.62092e-11	2.66332e+06	24/268/495	5.22318
Ratio	Large White	PC aa C38:6 / PC ae C40:1	6	MARC0019292	28970880	G	A	0.201	-0.168896	0.030007	2.5321e-08	1.67692e+06	24/268/495	5.54656
Ratio	Large White	PC aa C36:5 / PC aa C42:5	6	MARC0019292	28970880	G	A	0.201	-0.129469	0.0196591	8.29752e-11	1.2537e+06	24/268/495	7.79074
Ratio	Large White	PC aa C34:3 / PC ae C38:2	6	MARC0019292	28970880	G	A	0.201	-0.0913815	0.0154195	4.63977e-09	1.05977e+06	24/268/495	4.59839
Ratio	Large White	PC aa C38:5 / PC ae C38:2	6	MARC0019292	28970880	G	A	0.201	-0.159504	0.0258975	1.16933e-09	1.03013e+06	24/268/495	8.12952
Ratio	Large White	PC ae C36:2 / PC ae C38:2	6	MARC0019292	28970880	G	A	0.201	-0.131011	0.0221707	5.12672e-09	959112	24/268/495	6.64791
Ratio	Large White	PC aa C38:5 / lysoPC a C18:0	6	MARC0019292	28970880	G	A	0.201	-0.0941558	0.013012	1.10288e-12	946962	24/268/495	11.1523
Ratio	Large White	PC ae C38:1 / lysoPC a C16:0	6	MARC0019292	28970880	G	A	0.201	0.102016	0.0151248	2.97438e-11	879435	24/268/495	11.4218
Ratio	Large White	PC ae C38:2 / lysoPC a C16:0	6	MARC0019292	28970880	G	A	0.201	0.167324	0.0248079	2.97764e-11	878472	24/268/495	9.91365
Ratio	Large White	PC aa C38:6 / PC aa C42:5	6	MARC0019292	28970880	G	A	0.201	-0.16046	0.0260398	1.148e-09	733932	24/268/495	6.74892
Ratio	Large White	PC aa C36:4 / PC ae C40:3	6	MARC0019292	28970880	G	A	0.201	-1.32859	0.189604	5.24729e-12	675922	24/268/495	7.93746
Ratio	Large White	PC aa C26:0 / PC ae C44:3	6	MARC0019292	28970880	G	A	0.201	-0.0876262	0.0153258	1.53668e-08	626764	24/268/495	5.12706
Ratio	Large White	PC aa C34:3 / PC aa C36:1	6	MARC0019292	28970880	G	A	0.201	-0.0236856	0.003068	3.5457e-14	625468	24/268/495	5.22789
Ratio	Large White	PC aa C36:5 / PC aa C40:4	6	MARC0019292	28970880	G	A	0.201	-0.094982	0.0147186	1.91847e-10	542233	24/268/495	5.67632
Ratio	Large White	PC aa C36:5 / PC aa C42:4	6	MARC0019292	28970880	G	A	0.201	-0.110421	0.0172241	2.49945e-10	416194	24/268/495	4.30713
Ratio	Large White	PC ae C38:2 / PC ae C38:3	6	MARC0019292	28970880	G	A	0.201	0.0453927	0.00790279	1.32425e-08	371312	24/268/495	5.81775
Ratio	Large White	PC aa C34:4 / PC aa C36:2	6	MARC0019292	28970880	G	A	0.201	-0.00327477	0.000461437	2.86166e-12	364802	24/268/495	5.46322
Ratio	Large White	PC aa C32:2 / PC aa C36:2	6	MARC0019292	28970880	G	A	0.201	-0.00585603	0.000827198	3.22325e-12	323877	24/268/495	5.98689
Ratio	Large White	PC aa C38:5 / PC aa C42:6	6	MARC0019292	28970880	G	A	0.201	-1.69942	0.285535	4.00172e-09	301010	24/268/495	13.6842
Ratio	Large White	PC aa C36:4 / PC ae C40:1	6	MARC0019292	28970880	G	A	0.201	-0.290079	0.0421508	1.21018e-11	293076	24/268/495	4.21767
Ratio	Large White	PC aa C38:5 / PC ae C40:4	6	MARC0019292	28970880	G	A	0.201	-0.967886	0.163077	4.40811e-09	273259	24/268/495	5.53293
Ratio	Large White	PC aa C38:5 / PC ae C40:1	6	MARC0019292	28970880	G	A	0.201	-0.113506	0.0191725	4.8077e-09	250547	24/268/495	9.14692
Ratio	Large White	PC aa C42:4 / lysoPC a C16:0	6	MARC0019292	28970880	G	A	0.201	0.14733	0.0225913	1.24736e-10	209704	24/268/495	6.56989
Ratio	Large White	PC aa C34:3 / PC ae C38:1	6	MARC0019292	28970880	G	A	0.201	-0.0789434	0.0134102	5.83732e-09	204899	24/268/495	6.17013
Ratio	Large White	PC aa C36:4 / PC aa C42:6	6	MARC0019292	28970880	G	A	0.201	-1.0021	0.147408	2.10147e-11	168775	24/268/495	10.1898
Ratio	Large White	PC aa C38:5 / PC ae C42:2	6	MARC0019292	28970880	G	A	0.201	-0.302321	0.0517126	7.38159e-09	163184	24/268/495	3.8697
Ratio	Large White	PC aa C36:4 / PC aa C42:1	6	MARC0019292	28970880	G	A	0.201	-0.739157	0.108972	2.32045e-11	152848	24/268/495	6.75251
Single	Large White	PC aa C40:5	6	ALGA0034962	29065531	A	G	0.067	0.655063	0.0632898	1.28233e-23	-	4/97/686	9.94945
Single	Large White	PC aa C36:4	6	ALGA0034962	29065531	A	G	0.067	-4.37034	0.468674	1.10966e-19	-	4/97/686	7.06066
Single	Large White	PC aa C36:1	6	ALGA0034962	29065531	A	G	0.067	0.788542	0.090736	2.09237e-17	-	4/97/686	5.20729
Single	Large White	lysoPC a C18:0	6	ALGA0034962	29065531	A	G	0.067	2.6753	0.345989	3.24581e-14	-	4/97/686	11.9812
Single	Large White	PC aa C36:2	6	ALGA0034962	29065531	A	G	0.067	1.81544	0.254311	2.15299e-12	-	4/97/686	2.96585
Single	Large White	lysoPC a C16:0	6	ALGA0034962	29065531	A	G	0.067	-2.94535	0.438514	3.57478e-11	-	4/97/686	6.08148
Single	Large White	PC aa C38:5	6	ALGA0034962	29065531	A	G	0.067	-4.3052	0.654767	8.87626e-11	-	4/97/686	4.71048
Single	Large White	PC aa C38:4	6	ALGA0034962	29065531	A	G	0.067	17.8314	2.85884	7.27955e-10	-	4/97/686	3.71883
Single	Large White	PC aa C34:2	6	ALGA0034962	29065531	A	G	0.067	-0.760368	0.125515	2.13982e-09	-	4/97/686	4.07195
Single	Large White	PC aa C36:5	6	ALGA0034962	29065531	A	G	0.067	-0.196166	0.0339397	1.07938e-08	-	4/97/686	8.75627
Single	Large White	PC aa C40:4	6	ALGA0034962	29065531	A	G	0.067	0.334516	0.0606731	4.78139e-08	-	4/97/686	3.46078
Single	Large White	PC aa C38:6	6	ALGA0034962	29065531	A	G	0.067	-0.362639	0.0682735	1.41755e-07	-	4/97/686	4.45538
Single	Large White	PC aa C34:3	6	ALGA0034962	29065531	A	G	0.067	-0.1926	0.0392695	1.13909e-06	-	4/97/686	5.42155
Ratio	Large White	PC aa C38:4 / PC aa C38:5	6	ALGA0034962	29065531	A	G	0.067	0.00925511	0.000530409	7.59801e-58	1.16824e+47	4/97/686	11.3891
Ratio	Large White	PC aa C34:2 / PC aa C36:2	6	ALGA0034962	29065531	A	G	0.067	-0.200414	0.0113474	5.16706e-59	4.16677e+46	4/97/686	11.8818
Ratio	Large White	PC aa C38:5 / PC aa C40:5	6	ALGA0034962	29065531	A	G	0.067	-0.508558	0.0268352	3.27232e-66	3.91873e+42	4/97/686	11.6494
Ratio	Large White	PC aa C36:2 / PC aa C36:3	6	ALGA0034962	29065531	A	G	0.067	0.0357669	0.00216995	1.26899e-52	1.69662e+40	4/97/686	12.5101
Ratio	Large White	PC aa C36:4 / PC aa C40:5	6	ALGA0034962	29065531	A	G	0.067	-1.10204	0.059768	2.51219e-63	5.10445e+39	4/97/686	8.41952
Ratio	Large White	PC aa C36:1 / PC aa C36:4	6	ALGA0034962	29065531	A	G	0.067	0.598862	0.0340155	1.0519e-58	1.05492e+39	4/97/686	15.341
Ratio	Large White	lysoPC a C16:0 / lysoPC a C18:0	6	ALGA0034962	29065531	A	G	0.067	-0.435078	0.0262285	3.48009e-53	9.32679e+38	4/97/686	19.6187
Ratio	Large White	PC aa C38:6 / PC aa C40:6	6	ALGA0034962	29065531	A	G	0.067	-0.25972	0.017113	8.51939e-46	1.66392e+38	4/97/686	8.1419
Ratio	Large White	PC aa C36:4 / PC aa C38:4	6	ALGA0034962	29065531	A	G	0.067	-0.0906048	0.00522494	2.96522e-57	3.74226e+37	4/97/686	20.0213
Ratio	Large White	PC aa C34:1 / PC aa C36:1	6	ALGA0034962	29065531	A	G	0.067	-0.633719	0.0394714	2.34418e-50	8.9258e+32	4/97/686	12.7934
Ratio	Large White	PC aa C36:2 / PC aa C36:4	6	ALGA0034962	29065531	A	G	0.067	0.042362	0.00260125	1.42614e-51	7.78088e+31	4/97/686	15.2613
Ratio	Large White	PC aa C34:3 / PC aa C36:2	6	ALGA0034962	29065531	A	G	0.067	-0.0110397	0.00074205	2.8423e-44	7.57484e+31	4/97/686	8.85128
Ratio	Large White	PC aa C36:2 / lysoPC a C16:0	6	ALGA0034962	29065531	A	G	0.067	0.140359	0.00973616	5.83806e-42	3.68786e+29	4/97/686	4.42993
Ratio	Large White	PC aa C34:2 / PC aa C36:1	6	ALGA0034962	29065531	A	G	0.067	-0.571717	0.0372244	9.9265e-47	2.10786e+29	4/97/686	17.2557
Ratio	Large White	PC aa C36:1 / PC aa C38:5	6	ALGA0034962	29065531	A	G	0.067	0.154176	0.0100775	2.01376e-46	1.03904e+29	4/97/686	7.30363
Ratio	Large White	PC aa C36:4 / lysoPC a C18:0	6	ALGA0034962	29065531	A	G	0.067	-0.534625	0.0345208	2.16121e-47	5.13447e+27	4/97/686	6.37524
Ratio	Large White	PC aa C34:2 / PC ae C38:2	6	ALGA0034962	29065531	A	G	0.067	-2.82093	0.212455	1.96429e-36	1.08936e+27	4/97/686	17.7555
Ratio	Large White	PC aa C36:1 / PC aa C36:5	6	ALGA0034962	29065531	A	G	0.067	0.00942323	0.000634157	3.50014e-44	5.97796e+26	4/97/686	8.01808
Ratio	Large White	PC aa C36:2 / PC aa C38:5	6	ALGA0034962	29065531	A	G	0.067	0.0489767	0.00354958	6.33594e-39	3.39807e+26	4/97/686	6.03041
Ratio	Large White	PC aa C36:2 / PC aa C36:5	6	ALGA0034962	29065531	A	G	0.067	0.0120962	0.000877378	7.1702e-39	3.0027e+26	4/97/686	15.9184
Ratio	Large White	PC aa C36:1 / lysoPC a C16:0	6	ALGA0034962	29065531	A	G	0.067	0.328758	0.0226429	1.79132e-42	1.16806e+25	4/97/686	10.6487
Ratio	Large White	PC aa C36:1 / PC aa C36:3	6	ALGA0034962	29065531	A	G	0.067	0.246002	0.0169843	2.68347e-42	7.79726e+24	4/97/686	5.75635
Ratio	Large White	PC aa C38:4 / PC aa C38:6	6	ALGA0034962	29065531	A	G	0.067	0.0457111	0.00356962	3.18363e-34	2.28656e+24	4/97/686	6.22957
Ratio	Large White	PC aa C36:5 / PC aa C38:4	6	ALGA0034962	29065531	A	G	0.067	-0.0961698	0.00760058	1.60763e-33	4.52812e+23	4/97/686	6.62353
Ratio	Large White	PC aa C38:5 / PC aa C40:4	6	ALGA0034962	29065531	A	G	0.067	-0.536132	0.0418492	3.00336e-34	2.95545e+23	4/97/686	14.2052
Ratio	Large White	PC ae C36:2 / PC ae C38:2	6	ALGA0034962	29065531	A	G	0.067	-0.349708	0.0314941	1.04943e-26	6.13429e+22	4/97/686	10.6791
Ratio	Large White	PC aa C36:3 / PC ae C38:2	6	ALGA0034962	29065531	A	G	0.067	-0.471413	0.04197	3.02179e-27	1.4896e+22	4/97/686	8.49178
Ratio	Large White	PC aa C36:4 / PC ae C40:3	6	ALGA0034962	29065531	A	G	0.067	-3.73784	0.260131	1.00164e-41	1.10785e+22	4/97/686	14.2867
Ratio	Large White	PC aa C34:3 / PC aa C36:1	6	ALGA0034962	29065531	A	G	0.067	-0.0593205	0.00428016	3.18729e-39	6.56473e+21	4/97/686	7.19351
Ratio	Large White	PC aa C34:1 / PC aa C36:2	6	ALGA0034962	29065531	A	G	0.067	-0.146501	0.011486	5.47005e-34	3.93597e+21	4/97/686	5.95197
Ratio	Large White	PC aa C38:4 / lysoPC a C16:0	6	ALGA0034962	29065531	A	G	0.067	0.245075	0.0196668	1.20575e-32	2.96479e+21	4/97/686	12.7292
Ratio	Large White	PC aa C38:5 / lysoPC a C18:0	6	ALGA0034962	29065531	A	G	0.067	-0.240269	0.0183332	1.27147e-35	2.5528e+21	4/97/686	12.3724
Ratio	Large White	PC aa C36:4 / PC aa C42:4	6	ALGA0034962	29065531	A	G	0.067	-15.2928	1.07442	4.69664e-41	2.36268e+21	4/97/686	20.8909
Ratio	Large White	PC aa C36:4 / PC aa C40:2	6	ALGA0034962	29065531	A	G	0.067	-2.22277	0.15775	2.37216e-40	4.67786e+20	4/97/686	13.4079
Ratio	Large White	PC aa C36:4 / PC aa C40:4	6	ALGA0034962	29065531	A	G	0.067	-1.05802	0.0753782	4.38178e-40	2.53245e+20	4/97/686	17.2435
Ratio	Large White	PC aa C34:4 / PC aa C36:1	6	ALGA0034962	29065531	A	G	0.067	-0.00630285	0.000464656	8.4457e-38	2.47744e+20	4/97/686	13.7066
Ratio	Large White	PC aa C38:5 / PC aa C40:2	6	ALGA0034962	29065531	A	G	0.067	-0.34388	0.0284179	5.06067e-31	1.75397e+20	4/97/686	7.35078
Ratio	Large White	PC aa C40:5 / lysoPC a C16:0	6	ALGA0034962	29065531	A	G	0.067	0.496433	0.0337453	1.95769e-43	6.55024e+19	4/97/686	9.79883
Ratio	Large White	PC aa C36:5 / PC aa C40:5	6	ALGA0034962	29065531	A	G	0.067	-0.0710509	0.00483647	2.48317e-43	5.1641e+19	4/97/686	9.12578
Ratio	Large White	PC aa C34:4 / PC aa C36:2	6	ALGA0034962	29065531	A	G	0.067	-0.00801496	0.000649995	4.70579e-32	4.57521e+19	4/97/686	22.6409
Ratio	Large White	PC aa C38:5 / PC aa C42:4	6	ALGA0034962	29065531	A	G	0.067	-3.91684	0.331439	9.04037e-30	9.81847e+18	4/97/686	30.1674
Ratio	Large White	PC aa C34:2 / PC aa C40:5	6	ALGA0034962	29065531	A	G	0.067	-0.674042	0.0465241	2.56536e-42	4.99865e+18	4/97/686	6.93186
Ratio	Large White	PC aa C36:2 / PC ae C36:2	6	ALGA0034962	29065531	A	G	0.067	0.0459186	0.00379195	4.63083e-31	4.64926e+18	4/97/686	7.6453
Ratio	Large White	PC aa C36:4 / PC ae C38:2	6	ALGA0034962	29065531	A	G	0.067	-6.85834	0.502715	3.56207e-38	3.11522e+18	4/97/686	7.86818
Ratio	Large White	PC aa C32:2 / PC aa C36:2	6	ALGA0034962	29065531	A	G	0.067	-0.0139568	0.00117495	4.87908e-30	4.41271e+17	4/97/686	4.10451
Ratio	Large White	PC aa C34:4 / PC aa C40:5	6	ALGA0034962	29065531	A	G	0.067	-0.0320327	0.00224821	3.9767e-41	3.22462e+17	4/97/686	12.0774
Ratio	Large White	PC aa C38:5 / PC ae C40:3	6	ALGA0034962	29065531	A	G	0.067	-0.843982	0.0738631	4.50012e-28	1.97245e+17	4/97/686	4.34265
Ratio	Large White	PC aa C38:6 / PC aa C42:5	6	ALGA0034962	29065531	A	G	0.067	-0.393807	0.0372347	1.57961e-24	8.97408e+16	4/97/686	15.5053
Ratio	Large White	PC aa C34:2 / PC aa C40:4	6	ALGA0034962	29065531	A	G	0.067	-0.50357	0.0460517	5.33251e-26	4.01278e+16	4/97/686	9.86573
Ratio	Large White	PC aa C34:2 / PC aa C38:4	6	ALGA0034962	29065531	A	G	0.067	-0.2383	0.0215884	1.97587e-26	3.68422e+16	4/97/686	16.6407
Ratio	Large White	PC aa C34:2 / lysoPC a C18:0	6	ALGA0034962	29065531	A	G	0.067	-0.43015	0.0360199	2.56368e-30	1.26607e+16	4/97/686	16.1918
Ratio	Large White	PC aa C34:4 / PC aa C38:4	6	ALGA0034962	29065531	A	G	0.067	-0.494539	0.0453278	6.74517e-26	1.07922e+16	4/97/686	7.00952
Ratio	Large White	PC aa C36:4 / SM C16:0	6	ALGA0034962	29065531	A	G	0.067	-0.219054	0.0167119	1.24397e-35	8920366118740001	4/97/686	13.7287
Ratio	Large White	PC aa C32:0 / PC aa C36:2	6	ALGA0034962	29065531	A	G	0.067	-0.177807	0.0155598	4.45618e-28	4831477971170000	4/97/686	8.62435
Ratio	Large White	PC aa C34:3 / PC ae C38:2	6	ALGA0034962	29065531	A	G	0.067	-0.223896	0.0223324	2.44416e-22	4660454037190000	4/97/686	7.12646
Ratio	Large White	PC aa C36:4 / PC ae C38:1	6	ALGA0034962	29065531	A	G	0.067	-1.50716	0.115627	2.73494e-35	4057369511620000	4/97/686	16.2531
Ratio	Large White	PC aa C38:5 / PC aa C40:6	6	ALGA0034962	29065531	A	G	0.067	-0.503654	0.0457429	2.58175e-26	3438080928860000	4/97/686	8.2233
Ratio	Large White	lysoPC a C17:0 / lysoPC a C18:0	6	ALGA0034962	29065531	A	G	0.067	-0.0673881	0.00570452	9.46986e-30	3427513907810000	4/97/686	7.49331
Ratio	Large White	PC aa C36:5 / lysoPC a C18:0	6	ALGA0034962	29065531	A	G	0.067	-0.0819635	0.00694367	1.03739e-29	3128826437170000	4/97/686	4.57004
Ratio	Large White	PC aa C34:3 / PC aa C40:5	6	ALGA0034962	29065531	A	G	0.067	-0.157557	0.0113995	4.87662e-39	2629553818200000	4/97/686	8.37885
Ratio	Large White	PC aa C34:3 / PC aa C38:4	6	ALGA0034962	29065531	A	G	0.067	-0.196503	0.0182879	3.24132e-25	2.24586e+15	4/97/686	10.3051
Ratio	Large White	PC aa C38:6 / PC aa C40:5	6	ALGA0034962	29065531	A	G	0.067	-0.20487	0.0148515	6.57559e-39	1950143173490000	4/97/686	27.6458
Ratio	Large White	PC aa C40:5 / PC ae C40:5	6	ALGA0034962	29065531	A	G	0.067	0.153292	0.0111157	6.87824e-39	1864335294060000	4/97/686	5.57518
Ratio	Large White	PC aa C36:5 / PC aa C40:4	6	ALGA0034962	29065531	A	G	0.067	-0.220148	0.0211821	8.64003e-24	1249277780450000	4/97/686	12.2613
Ratio	Large White	PC aa C36:3 / PC aa C38:3	6	ALGA0034962	29065531	A	G	0.067	-0.214489	0.0226957	3.79484e-20	1186153137500000	4/97/686	15.5572
Ratio	Large White	PC aa C36:2 / PC aa C38:6	6	ALGA0034962	29065531	A	G	0.067	0.131815	0.0116984	2.13506e-27	1.0084e+15	4/97/686	4.26531
Ratio	Large White	PC aa C36:4 / PC ae C40:2	6	ALGA0034962	29065531	A	G	0.067	-26.1259	2.03122	1.74051e-34	637552736071000	4/97/686	8.15159
Ratio	Large White	PC ae C38:4 / PC ae C40:4	6	ALGA0034962	29065531	A	G	0.067	-0.085263	0.00980118	1.95039e-17	594034430002000	4/97/686	5.54371
Ratio	Large White	PC aa C34:2 / PC ae C38:1	6	ALGA0034962	29065531	A	G	0.067	-0.211397	0.0202485	5.59796e-24	382249741781000	4/97/686	11.5157
Ratio	Large White	PC aa C38:5 / PC aa C42:5	6	ALGA0034962	29065531	A	G	0.067	-2.40997	0.223563	2.33211e-25	380610614160000	4/97/686	14.7379
Ratio	Large White	PC aa C38:6 / PC ae C40:1	6	ALGA0034962	29065531	A	G	0.067	-0.43127	0.0432942	4.3425e-22	326437155354000	4/97/686	11.8624
Ratio	Large White	PC aa C36:4 / SM C16:1	6	ALGA0034962	29065531	A	G	0.067	-2.10273	0.164289	3.41683e-34	324764949917000	4/97/686	10.7312
Ratio	Large White	PC aa C36:4 / PC ae C40:4	6	ALGA0034962	29065531	A	G	0.067	-12.7641	1.00092	5.60834e-34	197859865079000	4/97/686	10.0781
Ratio	Large White	PC aa C36:4 / PC ae C42:5	6	ALGA0034962	29065531	A	G	0.067	-8.92938	0.702626	8.92313e-34	124358241030000	4/97/686	8.4545
Ratio	Large White	PC aa C36:1 / PC aa C38:6	6	ALGA0034962	29065531	A	G	0.067	0.106053	0.00869211	1.80362e-31	1.16009e+14	4/97/686	5.26724
Ratio	Large White	PC aa C38:6 / PC aa C42:4	6	ALGA0034962	29065531	A	G	0.067	-0.267709	0.0272316	1.3853e-21	102328378206000	4/97/686	9.72845
Ratio	Large White	PC aa C38:5 / PC ae C38:6	6	ALGA0034962	29065531	A	G	0.067	-8.05367	0.758157	1.02384e-24	86696046343300	4/97/686	10.596
Ratio	Large White	PC aa C36:4 / PC aa C38:3	6	ALGA0034962	29065531	A	G	0.067	-0.701593	0.0554102	1.46408e-33	75792699710900	4/97/686	9.93837
Ratio	Large White	PC aa C32:1 / PC aa C36:1	6	ALGA0034962	29065531	A	G	0.067	-0.0378674	0.00311792	3.21224e-31	65137361919000	4/97/686	7.37504
Ratio	Large White	PC aa C38:5 / PC ae C40:4	6	ALGA0034962	29065531	A	G	0.067	-2.48179	0.235095	1.89957e-24	46727719048100	4/97/686	9.08953
Ratio	Large White	PC ae C38:2 / lysoPC a C17:0	6	ALGA0034962	29065531	A	G	0.067	0.17448	0.0193837	1.66508e-18	44475919131700	4/97/686	8.53572
Ratio	Large White	PC aa C34:2 / PC aa C38:3	6	ALGA0034962	29065531	A	G	0.067	-0.420843	0.0412937	5.46933e-23	39123958350300	4/97/686	6.24671
Ratio	Large White	PC aa C36:1 / PC ae C36:1	6	ALGA0034962	29065531	A	G	0.067	0.0449826	0.00372384	6.29e-31	3.3265e+13	4/97/686	13.138
Ratio	Large White	PC aa C36:4 / PC aa C42:5	6	ALGA0034962	29065531	A	G	0.067	-5.36832	0.426675	3.40728e-33	3.25674e+13	4/97/686	8.3102
Ratio	Large White	PC aa C32:2 / PC aa C36:1	6	ALGA0034962	29065531	A	G	0.067	-0.0246666	0.0020429	6.64018e-31	31510752493000	4/97/686	5.23071
Ratio	Large White	PC aa C38:5 / PC ae C38:2	6	ALGA0034962	29065531	A	G	0.067	-0.393774	0.0374777	3.01535e-24	29436930849500	4/97/686	4.48005
Ratio	Large White	PC aa C36:1 / PC ae C36:2	6	ALGA0034962	29065531	A	G	0.067	0.110459	0.0091535	7.12701e-31	29358311910100	4/97/686	8.52162
Ratio	Large White	PC aa C36:4 / PC ae C32:1	6	ALGA0034962	29065531	A	G	0.067	-6.95484	0.553294	3.86115e-33	28739243163100	4/97/686	8.39351
Ratio	Large White	PC aa C38:0 / PC aa C38:6	6	ALGA0034962	29065531	A	G	0.067	4.73915	0.489346	5.00474e-21	28324234290700	4/97/686	4.86992
Ratio	Large White	PC aa C36:4 / PC ae C34:1	6	ALGA0034962	29065531	A	G	0.067	-2.28523	0.181865	4.04221e-33	27451918045900	4/97/686	15.6143
Ratio	Large White	PC aa C32:2 / PC ae C38:2	6	ALGA0034962	29065531	A	G	0.067	-0.155514	0.0179881	3.00334e-17	2.14344e+13	4/97/686	10.6078
Ratio	Large White	PC aa C36:4 / PC ae C42:4	6	ALGA0034962	29065531	A	G	0.067	-1.78504	0.142414	5.61966e-33	19746123431000	4/97/686	23.0611
Ratio	Large White	PC aa C36:5 / PC ae C38:2	6	ALGA0034962	29065531	A	G	0.067	-0.229691	0.0231856	7.07459e-22	1.52571e+13	4/97/686	13.6486
Ratio	Large White	PC aa C38:5 / PC ae C42:2	6	ALGA0034962	29065531	A	G	0.067	-0.77298	0.0743438	8.30882e-24	10682943191600	4/97/686	16.9237
Ratio	Large White	PC aa C36:5 / PC aa C40:2	6	ALGA0034962	29065531	A	G	0.067	-0.159092	0.0161301	1.0414e-21	10364671505700	4/97/686	16.2628
Ratio	Large White	PC aa C36:3 / PC ae C38:1	6	ALGA0034962	29065531	A	G	0.067	-0.158715	0.0178923	4.872e-18	9239035459970	4/97/686	6.74638
Ratio	Large White	PC aa C34:2 / PC aa C42:4	6	ALGA0034962	29065531	A	G	0.067	-0.422807	0.0422634	2.96407e-22	7219188480700	4/97/686	7.75743
Ratio	Large White	PC aa C38:6 / lysoPC a C18:0	6	ALGA0034962	29065531	A	G	0.067	-0.155022	0.0138524	4.51076e-27	7195695538800	4/97/686	19.4712
Ratio	Large White	PC aa C36:4 / PC ae C36:3	6	ALGA0034962	29065531	A	G	0.067	-1.47452	0.118596	1.62058e-32	6847345112270	4/97/686	8.28346
Ratio	Large White	PC aa C36:4 / PC ae C32:2	6	ALGA0034962	29065531	A	G	0.067	-7.53232	0.606006	1.68347e-32	6591530237230	4/97/686	10.4113
Ratio	Large White	lysoPC a C16:1 / lysoPC a C18:0	6	ALGA0034962	29065531	A	G	0.067	-0.0807124	0.00721899	4.99188e-27	6502174832360	4/97/686	5.63745
Ratio	Large White	PC aa C38:5 / PC ae C42:5	6	ALGA0034962	29065531	A	G	0.067	-9.76612	0.948039	2.00684e-23	4422999917280	4/97/686	9.29866
Ratio	Large White	PC aa C38:5 / PC aa C40:3	6	ALGA0034962	29065531	A	G	0.067	-0.0888321	0.00863132	2.19036e-23	4052421519750	4/97/686	13.3386
Ratio	Large White	PC aa C36:4 / PC ae C38:6	6	ALGA0034962	29065531	A	G	0.067	-21.5716	1.74484	3.36442e-32	3298237614950	4/97/686	9.7579
Ratio	Large White	PC aa C36:4 / PC aa C38:0	6	ALGA0034962	29065531	A	G	0.067	-4.9944	0.404122	3.52228e-32	3150417669920	4/97/686	9.31967
Ratio	Large White	PC aa C36:5 / PC ae C38:1	6	ALGA0034962	29065531	A	G	0.067	-0.219374	0.0226156	4.37184e-21	2468938693520	4/97/686	28.256
Ratio	Large White	PC aa C36:5 / PC aa C38:3	6	ALGA0034962	29065531	A	G	0.067	-0.104821	0.0108281	5.19306e-21	2078506374670	4/97/686	4.81675
Ratio	Large White	PC aa C34:4 / PC ae C38:2	6	ALGA0034962	29065531	A	G	0.067	-0.174182	0.0201846	3.41108e-17	2.0368e+12	4/97/686	9.51566
Ratio	Large White	PC aa C36:5 / PC ae C40:3	6	ALGA0034962	29065531	A	G	0.067	-0.215763	0.0223407	6.3239e-21	1706825404050	4/97/686	21.1272
Ratio	Large White	PC aa C32:0 / PC aa C36:1	6	ALGA0034962	29065531	A	G	0.067	-0.229533	0.0194911	1.37265e-29	1524328470970	4/97/686	10.123
Ratio	Large White	PC aa C40:4 / lysoPC a C16:0	6	ALGA0034962	29065531	A	G	0.067	0.377671	0.0367336	2.41097e-23	1482714440480	4/97/686	13.8159
Ratio	Large White	PC aa C36:3 / PC aa C40:5	6	ALGA0034962	29065531	A	G	0.067	-0.335239	0.0255719	1.21755e-35	1053211087540	4/97/686	8.5941
Ratio	Large White	PC aa C34:4 / PC ae C38:1	6	ALGA0034962	29065531	A	G	0.067	-0.229673	0.0268753	6.63074e-17	1047801480860	4/97/686	8.03185
Ratio	Large White	PC aa C38:5 / PC ae C38:1	6	ALGA0034962	29065531	A	G	0.067	-0.540311	0.0533882	1.04084e-22	852797932439	4/97/686	5.45734
Ratio	Large White	PC aa C34:3 / PC aa C40:4	6	ALGA0034962	29065531	A	G	0.067	-0.22357	0.0238087	6.36084e-20	751691875867	4/97/686	9.74213
Ratio	Large White	PC ae C38:2 / lysoPC a C16:0	6	ALGA0034962	29065531	A	G	0.067	0.367102	0.0360373	5.71022e-23	626032775987	4/97/686	5.393
Ratio	Large White	PC aa C34:2 / PC aa C40:2	6	ALGA0034962	29065531	A	G	0.067	-0.897969	0.0923206	3.46573e-21	617421480535	4/97/686	17.0318
Ratio	Large White	PC aa C34:1 / PC aa C40:5	6	ALGA0034962	29065531	A	G	0.067	-0.501852	0.038427	2.085e-35	615028887318	4/97/686	8.40789
Ratio	Large White	PC aa C34:2 / PC ae C40:3	6	ALGA0034962	29065531	A	G	0.067	-0.897225	0.092286	3.60285e-21	593923864142	4/97/686	6.91679
Ratio	Large White	PC aa C38:0 / PC aa C38:5	6	ALGA0034962	29065531	A	G	0.067	3.46908	0.344925	1.83573e-22	483527116159	4/97/686	7.59498
Ratio	Large White	PC aa C38:5 / PC ae C40:5	6	ALGA0034962	29065531	A	G	0.067	-1.70749	0.169787	1.849e-22	480057696083	4/97/686	5.04372
Ratio	Large White	PC aa C36:5 / PC aa C42:4	6	ALGA0034962	29065531	A	G	0.067	-0.240203	0.0252609	2.30042e-20	469209358453	4/97/686	14.1903
Ratio	Large White	PC aa C36:4 / PC ae C42:2	6	ALGA0034962	29065531	A	G	0.067	-1.29539	0.106423	2.43382e-31	455934963225	4/97/686	15.9068
Ratio	Large White	PC aa C38:6 / PC ae C42:3	6	ALGA0034962	29065531	A	G	0.067	-1.79167	0.194775	3.21983e-19	4.40257e+11	4/97/686	12.2676
Ratio	Large White	PC aa C34:1 / PC aa C40:4	6	ALGA0034962	29065531	A	G	0.067	-0.302746	0.0326025	1.54316e-19	309843548608	4/97/686	7.12078
Ratio	Large White	PC aa C36:3 / PC aa C40:4	6	ALGA0034962	29065531	A	G	0.067	-0.280315	0.0302022	1.60584e-19	297749964038	4/97/686	13.6587
Ratio	Large White	PC aa C38:5 / SM C16:0	6	ALGA0034962	29065531	A	G	0.067	-0.083013	0.00830943	3.35608e-22	2.64483e+11	4/97/686	7.51178
Ratio	Large White	PC ae C38:1 / lysoPC a C17:0	6	ALGA0034962	29065531	A	G	0.067	0.206615	0.024727	2.94753e-16	251246907582	4/97/686	5.7529
Ratio	Large White	PC aa C36:4 / PC aa C40:6	6	ALGA0034962	29065531	A	G	0.067	-0.648872	0.0535719	4.50361e-31	2.46395e+11	4/97/686	13.3932
Ratio	Large White	PC aa C38:5 / PC ae C42:4	6	ALGA0034962	29065531	A	G	0.067	-0.991529	0.099562	4.43912e-22	199955486663	4/97/686	7.78326
Ratio	Large White	PC aa C36:4 / PC aa C42:2	6	ALGA0034962	29065531	A	G	0.067	-2.02086	0.167179	5.77201e-31	192249287120	4/97/686	21.9505
Ratio	Large White	PC aa C38:3 / PC aa C38:5	6	ALGA0034962	29065531	A	G	0.067	0.278204	0.0279734	5.01191e-22	177103521096	4/97/686	11.0876
Ratio	Large White	PC aa C38:6 / PC aa C40:4	6	ALGA0034962	29065531	A	G	0.067	-0.274896	0.0298261	2.76975e-19	172628662102	4/97/686	10.545
Ratio	Large White	PC aa C34:1 / PC aa C38:3	6	ALGA0034962	29065531	A	G	0.067	-0.245622	0.0296272	4.89465e-16	157340127964	4/97/686	9.28064
Ratio	Large White	PC aa C34:2 / PC ae C32:1	6	ALGA0034962	29065531	A	G	0.067	-1.36868	0.143116	1.43679e-20	148930774012	4/97/686	19.4788
Ratio	Large White	PC aa C36:4 / SM (OH) C14:1	6	ALGA0034962	29065531	A	G	0.067	-13.881	1.15279	9.31733e-31	119096925545	4/97/686	24.6723
Ratio	Large White	PC aa C34:4 / PC aa C40:4	6	ALGA0034962	29065531	A	G	0.067	-0.124619	0.013591	4.12143e-19	116012969291	4/97/686	25.6623
Ratio	Large White	PC aa C36:4 / PC aa C42:1	6	ALGA0034962	29065531	A	G	0.067	-1.8737	0.155769	1.05849e-30	104835212592	4/97/686	10.1921
Ratio	Large White	PC aa C36:4 / PC aa C40:3	6	ALGA0034962	29065531	A	G	0.067	-0.256193	0.0213184	1.18845e-30	9.33712e+10	4/97/686	9.3257
Ratio	Large White	PC aa C36:3 / PC aa C38:4	6	ALGA0034962	29065531	A	G	0.067	-0.235333	0.0244328	7.93247e-21	9.1769e+10	4/97/686	11.1919
Ratio	Large White	PC aa C36:4 / PC ae C40:5	6	ALGA0034962	29065531	A	G	0.067	-3.22326	0.26828	1.22426e-30	9.06394e+10	4/97/686	9.67907
Ratio	Large White	PC aa C34:4 / PC ae C40:3	6	ALGA0034962	29065531	A	G	0.067	-0.165291	0.0200851	7.82275e-16	8.8814e+10	4/97/686	8.11259
Ratio	Large White	PC aa C38:5 / PC ae C36:5	6	ALGA0034962	29065531	A	G	0.067	-1.03678	0.105099	1.02526e-21	8.65759e+10	4/97/686	4.93684
Ratio	Large White	PC aa C38:5 / PC aa C42:6	6	ALGA0034962	29065531	A	G	0.067	-4.0893	0.414672	1.05553e-21	8.40927e+10	4/97/686	9.65192
Ratio	Large White	PC aa C32:2 / PC ae C38:1	6	ALGA0034962	29065531	A	G	0.067	-0.16179	0.0203339	6.18987e-15	7.98498e+10	4/97/686	9.8535
Ratio	Large White	PC aa C36:4 / PC aa C42:6	6	ALGA0034962	29065531	A	G	0.067	-2.51254	0.209525	1.54734e-30	7.17145e+10	4/97/686	12.4741
Ratio	Large White	PC aa C34:3 / PC aa C42:4	6	ALGA0034962	29065531	A	G	0.067	-0.165576	0.019	1.72513e-17	6.60291e+10	4/97/686	23.3577
Ratio	Large White	PC aa C34:3 / PC ae C38:1	6	ALGA0034962	29065531	A	G	0.067	-0.171325	0.0197667	2.51987e-17	4.52044e+10	4/97/686	21.9094
Ratio	Large White	PC aa C36:5 / PC ae C40:1	6	ALGA0034962	29065531	A	G	0.067	-0.222351	0.0241146	2.67946e-19	4.02834e+10	4/97/686	11.659
Ratio	Large White	PC aa C34:1 / PC aa C36:4	6	ALGA0034962	29065531	A	G	0.067	0.122675	0.0102822	2.87346e-30	3.86178e+10	4/97/686	15.3166
Ratio	Large White	PC aa C34:1 / PC ae C38:2	6	ALGA0034962	29065531	A	G	0.067	-0.181458	0.0232331	1.83248e-14	3.51299e+10	4/97/686	20.1455
Ratio	Large White	PC aa C38:5 / SM C16:1	6	ALGA0034962	29065531	A	G	0.067	-0.566078	0.0580143	2.64214e-21	3.3595e+10	4/97/686	9.26494
Ratio	Large White	PC aa C36:4 / PC ae C36:5	6	ALGA0034962	29065531	A	G	0.067	-2.9984	0.251853	3.72084e-30	2.9823e+10	4/97/686	4.99043
Ratio	Large White	PC aa C34:4 / lysoPC a C18:0	6	ALGA0034962	29065531	A	G	0.067	-0.162409	0.0153099	1.17345e-24	2.76603e+10	4/97/686	15.53
Ratio	Large White	PC aa C42:4 / lysoPC a C16:0	6	ALGA0034962	29065531	A	G	0.067	0.322629	0.032796	1.30632e-21	2.73652e+10	4/97/686	4.80682
Ratio	Large White	PC aa C34:4 / PC aa C42:4	6	ALGA0034962	29065531	A	G	0.067	-0.153369	0.0190012	2.60965e-15	2.66231e+10	4/97/686	3.73236
Ratio	Large White	PC aa C36:5 / PC ae C42:2	6	ALGA0034962	29065531	A	G	0.067	-0.28662	0.0312783	4.32344e-19	2.49658e+10	4/97/686	4.61405
Ratio	Large White	PC aa C34:3 / lysoPC a C18:0	6	ALGA0034962	29065531	A	G	0.067	-0.158948	0.0150217	1.50957e-24	2.15015e+10	4/97/686	15.6873
Ratio	Large White	PC aa C36:3 / PC ae C40:3	6	ALGA0034962	29065531	A	G	0.067	-0.310513	0.0383769	2.24964e-15	2.00088e+10	4/97/686	5.62098
Ratio	Large White	PC aa C36:5 / PC aa C40:6	6	ALGA0034962	29065531	A	G	0.067	-0.230694	0.0252532	5.47961e-19	1.96981e+10	4/97/686	27.8952
Ratio	Large White	PC aa C38:5 / PC aa C42:1	6	ALGA0034962	29065531	A	G	0.067	-0.944995	0.0975138	4.73957e-21	1.8728e+10	4/97/686	7.19669
Ratio	Large White	PC aa C36:2 / lysoPC a C17:0	6	ALGA0034962	29065531	A	G	0.067	0.0501886	0.00496855	1.23763e-22	1.73961e+10	4/97/686	8.00566
Ratio	Large White	PC aa C36:3 / PC aa C40:2	6	ALGA0034962	29065531	A	G	0.067	-0.200435	0.0248621	2.80662e-15	1.6038e+10	4/97/686	9.49611
Ratio	Large White	PC aa C34:4 / PC aa C40:2	6	ALGA0034962	29065531	A	G	0.067	-0.170013	0.021265	4.64605e-15	1.4954e+10	4/97/686	5.16049
Ratio	Large White	PC aa C36:3 / lysoPC a C18:0	6	ALGA0034962	29065531	A	G	0.067	-0.231228	0.0219355	2.19006e-24	1.48206e+10	4/97/686	20.4722
Ratio	Large White	PC aa C40:5 / PC ae C38:4	6	ALGA0034962	29065531	A	G	0.067	0.176993	0.013925	8.74465e-34	1.46642e+10	4/97/686	15.7062
Ratio	Large White	PC aa C38:4 / lysoPC a C16:1	6	ALGA0034962	29065531	A	G	0.067	0.672681	0.0715114	5.53236e-20	1.31581e+10	4/97/686	14.8933
Ratio	Large White	PC aa C38:6 / PC ae C42:2	6	ALGA0034962	29065531	A	G	0.067	-0.587928	0.067153	1.24433e-17	1.13921e+10	4/97/686	8.5429
Ratio	Large White	PC aa C34:2 / PC ae C36:3	6	ALGA0034962	29065531	A	G	0.067	-0.514918	0.0559147	2.95329e-19	7.24554e+09	4/97/686	8.35495
Ratio	Large White	PC aa C36:4 / PC ae C34:2	6	ALGA0034962	29065531	A	G	0.067	-0.872428	0.0741788	1.59868e-29	6.94112e+09	4/97/686	21.5681
Ratio	Large White	PC aa C30:0 / PC aa C36:4	6	ALGA0034962	29065531	A	G	0.067	8.7141	0.740978	1.61304e-29	6.87934e+09	4/97/686	6.59642
Ratio	Large White	PC aa C34:2 / PC ae C32:2	6	ALGA0034962	29065531	A	G	0.067	-0.788005	0.0858063	3.65694e-19	5.85139e+09	4/97/686	7.44532
Ratio	Large White	PC aa C36:4 / SM C24:0	6	ALGA0034962	29065531	A	G	0.067	-1.03097	0.0877986	1.92962e-29	5.75069e+09	4/97/686	21.5209
Ratio	Large White	PC aa C36:0 / PC aa C36:4	6	ALGA0034962	29065531	A	G	0.067	0.0170578	0.00145352	2.0694e-29	5.36225e+09	4/97/686	5.58133
Ratio	Large White	PC aa C34:1 / PC ae C38:1	6	ALGA0034962	29065531	A	G	0.067	-0.0686079	0.00905114	9.77756e-14	5.05505e+09	4/97/686	9.08373
Ratio	Large White	PC aa C36:3 / PC aa C42:4	6	ALGA0034962	29065531	A	G	0.067	-0.2092	0.0264746	9.30596e-15	4.83696e+09	4/97/686	9.33437
Ratio	Large White	PC aa C34:3 / PC ae C40:3	6	ALGA0034962	29065531	A	G	0.067	-0.195552	0.0234597	3.44818e-16	3.30345e+09	4/97/686	16.7461
Ratio	Large White	PC aa C36:1 / PC ae C34:1	6	ALGA0034962	29065531	A	G	0.067	0.114216	0.0102423	6.62464e-27	3.15847e+09	4/97/686	15.7841
Ratio	Large White	PC aa C34:3 / PC aa C40:2	6	ALGA0034962	29065531	A	G	0.067	-0.160385	0.0192593	3.66855e-16	3.10502e+09	4/97/686	5.94289
Ratio	Large White	PC aa C38:3 / lysoPC a C17:0	6	ALGA0034962	29065531	A	G	0.067	0.128052	0.0164959	2.60042e-14	2.84784e+09	4/97/686	10.7225
Ratio	Large White	PC aa C38:6 / PC aa C42:1	6	ALGA0034962	29065531	A	G	0.067	-0.471779	0.0550246	5.30692e-17	2.67114e+09	4/97/686	8.64428
Ratio	Large White	PC aa C34:2 / PC ae C34:1	6	ALGA0034962	29065531	A	G	0.067	-0.306108	0.0336859	8.18105e-19	2.61558e+09	4/97/686	5.35644
Ratio	Large White	PC aa C36:5 / PC ae C38:6	6	ALGA0034962	29065531	A	G	0.067	-0.268796	0.0302358	4.15683e-18	2.59664e+09	4/97/686	6.51418
Ratio	Large White	PC aa C36:5 / PC aa C38:0	6	ALGA0034962	29065531	A	G	0.067	-0.39289	0.0442214	4.3442e-18	2.48465e+09	4/97/686	5.08097
Ratio	Large White	PC aa C36:5 / PC aa C42:5	6	ALGA0034962	29065531	A	G	0.067	-0.258331	0.0290801	4.38641e-18	2.46073e+09	4/97/686	15.2033
Ratio	Large White	PC ae C40:3 / lysoPC a C16:0	6	ALGA0034962	29065531	A	G	0.067	0.633012	0.0664832	2.06581e-20	1.73045e+09	4/97/686	6.68008
Ratio	Large White	PC aa C34:4 / PC aa C38:3	6	ALGA0034962	29065531	A	G	0.067	-0.113125	0.0146937	4.14197e-14	1.67739e+09	4/97/686	9.87476
Ratio	Large White	PC aa C38:6 / PC aa C40:2	6	ALGA0034962	29065531	A	G	0.067	-0.139819	0.0164375	9.08237e-17	1.56078e+09	4/97/686	10.6404
Ratio	Large White	PC aa C38:6 / PC ae C38:6	6	ALGA0034962	29065531	A	G	0.067	-0.659518	0.0775749	9.40292e-17	1.50757e+09	4/97/686	8.09831
Ratio	Large White	PC ae C36:2 / PC ae C38:1	6	ALGA0034962	29065531	A	G	0.067	-0.0914361	0.0123682	3.69785e-13	1.33661e+09	4/97/686	6.093
Ratio	Large White	PC aa C34:2 / PC ae C40:4	6	ALGA0034962	29065531	A	G	0.067	-0.701773	0.077925	1.60593e-18	1.33244e+09	4/97/686	9.0382
Ratio	Large White	PC aa C34:2 / PC ae C40:2	6	ALGA0034962	29065531	A	G	0.067	-0.498011	0.0553545	1.72966e-18	1.23713e+09	4/97/686	12.4038
Ratio	Large White	PC aa C34:2 / PC aa C36:0	6	ALGA0034962	29065531	A	G	0.067	-0.00690804	0.000769139	1.96119e-18	1.09108e+09	4/97/686	7.22344
Ratio	Large White	PC aa C36:4 / SM C18:1	6	ALGA0034962	29065531	A	G	0.067	-3.47488	0.300288	1.06373e-28	1.04318e+09	4/97/686	7.00395
Ratio	Large White	PC aa C34:2 / PC ae C42:4	6	ALGA0034962	29065531	A	G	0.067	-0.274975	0.0306456	2.10787e-18	1.01516e+09	4/97/686	7.08368
Ratio	Large White	PC aa C34:2 / SM C16:0	6	ALGA0034962	29065531	A	G	0.067	-0.25215	0.0281817	2.59864e-18	8.23439e+08	4/97/686	7.87503
Ratio	Large White	PC aa C36:1 / lysoPC a C16:1	6	ALGA0034962	29065531	A	G	0.067	0.0530884	0.00482359	2.6971e-26	7.75787e+08	4/97/686	7.2755
Ratio	Large White	PC aa C38:5 / PC ae C40:1	6	ALGA0034962	29065531	A	G	0.067	-0.262072	0.028122	1.16533e-19	7.61693e+08	4/97/686	6.02626
Ratio	Large White	PC aa C36:1 / lysoPC a C17:0	6	ALGA0034962	29065531	A	G	0.067	0.0348799	0.00317306	3.06972e-26	6.81616e+08	4/97/686	7.7879
Ratio	Large White	PC aa C32:0 / PC ae C38:2	6	ALGA0034962	29065531	A	G	0.067	-0.0485003	0.00669769	1.06326e-12	6.05448e+08	4/97/686	6.99752
Ratio	Large White	PC aa C38:6 / PC ae C40:3	6	ALGA0034962	29065531	A	G	0.067	-0.188475	0.0225094	2.57531e-16	5.50439e+08	4/97/686	7.8779
Ratio	Large White	PC aa C38:5 / PC ae C40:2	6	ALGA0034962	29065531	A	G	0.067	-8.40391	0.905715	1.64019e-19	5.41172e+08	4/97/686	14.9488
Ratio	Large White	PC aa C38:5 / SM C18:1	6	ALGA0034962	29065531	A	G	0.067	-1.17106	0.126261	1.69502e-19	5.23668e+08	4/97/686	9.12747
Ratio	Large White	PC aa C34:3 / PC aa C38:0	6	ALGA0034962	29065531	A	G	0.067	-0.270799	0.0334643	2.23196e-15	5.10355e+08	4/97/686	6.94803
Ratio	Large White	PC aa C36:4 / PC ae C34:0	6	ALGA0034962	29065531	A	G	0.067	-3.44023	0.299219	2.22801e-28	4.98053e+08	4/97/686	7.14959
Ratio	Large White	lysoPC a C16:0 / SM C16:0	6	ALGA0034962	29065531	A	G	0.067	-0.123136	0.013166	8.76828e-20	4.07695e+08	4/97/686	6.49365
Ratio	Large White	PC aa C34:3 / PC ae C32:1	6	ALGA0034962	29065531	A	G	0.067	-0.223715	0.0277678	2.92052e-15	3.90031e+08	4/97/686	7.82029
Ratio	Large White	PC aa C32:1 / PC aa C36:2	6	ALGA0034962	29065531	A	G	0.067	-0.034615	0.0035819	6.00205e-21	3.5871e+08	4/97/686	15.8431
Ratio	Large White	PC aa C38:5 / PC ae C38:5	6	ALGA0034962	29065531	A	G	0.067	-1.12082	0.1215	2.58376e-19	3.43541e+08	4/97/686	8.82694
Ratio	Large White	PC aa C40:4 / lysoPC a C17:0	6	ALGA0034962	29065531	A	G	0.067	0.174348	0.0206436	1.46128e-16	3.27205e+08	4/97/686	9.23293
Ratio	Large White	PC aa C34:1 / PC aa C38:4	6	ALGA0034962	29065531	A	G	0.067	-0.206	0.0229798	2.2583e-18	3.22346e+08	4/97/686	15.0711
Ratio	Large White	PC aa C36:4 / PC ae C38:3	6	ALGA0034962	29065531	A	G	0.067	-1.75418	0.15316	3.44766e-28	3.21861e+08	4/97/686	6.23603
Ratio	Large White	PC aa C36:0 / PC aa C38:6	6	ALGA0034962	29065531	A	G	0.067	0.0398044	0.00480573	5.19582e-16	2.72826e+08	4/97/686	25.2049
Ratio	Large White	PC aa C36:4 / PC ae C40:1	6	ALGA0034962	29065531	A	G	0.067	-0.694254	0.0607787	4.66502e-28	2.37869e+08	4/97/686	6.40621
Ratio	Large White	PC aa C34:3 / PC aa C38:3	6	ALGA0034962	29065531	A	G	0.067	-0.164958	0.0206603	5.0318e-15	2.26378e+08	4/97/686	7.62847
Ratio	Large White	PC aa C36:4 / PC ae C34:3	6	ALGA0034962	29065531	A	G	0.067	-0.565304	0.0495223	5.02415e-28	2.20866e+08	4/97/686	5.61137
Ratio	Large White	PC ae C36:1 / PC ae C38:2	6	ALGA0034962	29065531	A	G	0.067	-0.0834409	0.0117622	2.91881e-12	2.20551e+08	4/97/686	6.88315
Ratio	Large White	PC aa C36:4 / PC ae C36:4	6	ALGA0034962	29065531	A	G	0.067	-4.77769	0.418797	5.38324e-28	2.06133e+08	4/97/686	7.45363
Ratio	Large White	PC aa C34:4 / PC ae C40:4	6	ALGA0034962	29065531	A	G	0.067	-0.17401	0.023498	3.38665e-13	2.0515e+08	4/97/686	17.3697
Ratio	Large White	PC aa C36:5 / PC ae C40:4	6	ALGA0034962	29065531	A	G	0.067	-0.211338	0.0246754	5.71003e-17	1.89032e+08	4/97/686	5.04392
Ratio	Large White	PC aa C34:2 / PC ae C42:5	6	ALGA0034962	29065531	A	G	0.067	-0.871708	0.0994796	1.17e-17	1.8289e+08	4/97/686	13.4964
Ratio	Large White	PC aa C38:3 / lysoPC a C16:0	6	ALGA0034962	29065531	A	G	0.067	0.306055	0.0331002	2.15719e-19	1.65715e+08	4/97/686	15.641
Ratio	Large White	PC aa C36:4 / PC ae C38:5	6	ALGA0034962	29065531	A	G	0.067	-3.10948	0.273197	6.97671e-28	1.59053e+08	4/97/686	14.5408
Ratio	Large White	PC aa C30:0 / PC aa C34:2	6	ALGA0034962	29065531	A	G	0.067	0.965607	0.110455	1.38168e-17	1.5487e+08	4/97/686	5.04825
Ratio	Large White	PC aa C38:6 / PC ae C38:0	6	ALGA0034962	29065531	A	G	0.067	-0.683428	0.0833236	9.65835e-16	1.4677e+08	4/97/686	19.1262
Ratio	Large White	PC aa C40:5 / lysoPC a C16:1	6	ALGA0034962	29065531	A	G	0.067	0.166869	0.0135998	8.84972e-32	1.44901e+08	4/97/686	9.74965
Ratio	Large White	PC aa C36:4 / SM C20:2	6	ALGA0034962	29065531	A	G	0.067	-0.297908	0.026201	7.82851e-28	1.41747e+08	4/97/686	6.58243
Ratio	Large White	PC aa C32:2 / PC aa C40:4	6	ALGA0034962	29065531	A	G	0.067	-0.16117	0.0193433	3.54385e-16	1.34921e+08	4/97/686	7.05567
Ratio	Large White	PC aa C36:5 / PC ae C42:5	6	ALGA0034962	29065531	A	G	0.067	-0.306759	0.0360317	8.55984e-17	1.26098e+08	4/97/686	8.14871
Ratio	Large White	PC ae C38:1 / lysoPC a C16:0	6	ALGA0034962	29065531	A	G	0.067	0.205387	0.0223018	2.94194e-19	1.21511e+08	4/97/686	14.9815
Ratio	Large White	PC aa C38:5 / PC ae C32:1	6	ALGA0034962	29065531	A	G	0.067	-1.90338	0.209164	7.35304e-19	1.20716e+08	4/97/686	15.6593
Ratio	Large White	PC aa C38:5 / PC aa C42:0	6	ALGA0034962	29065531	A	G	0.067	-0.837651	0.0920753	7.5072e-19	1.18237e+08	4/97/686	17.9192
Ratio	Large White	PC aa C36:4 / PC aa C42:0	6	ALGA0034962	29065531	A	G	0.067	-1.91176	0.168423	9.44829e-28	1.17446e+08	4/97/686	9.01189
Ratio	Large White	PC aa C36:0 / PC aa C36:3	6	ALGA0034962	29065531	A	G	0.067	0.0129767	0.00175657	3.83938e-13	1.17239e+08	4/97/686	17.8119
Ratio	Large White	PC aa C38:6 / PC aa C42:6	6	ALGA0034962	29065531	A	G	0.067	-0.756239	0.0925503	1.2242e-15	1.15794e+08	4/97/686	3.78323
Ratio	Large White	PC aa C34:4 / PC ae C42:5	6	ALGA0034962	29065531	A	G	0.067	-0.129285	0.0176625	6.17002e-13	1.12604e+08	4/97/686	5.24474
Ratio	Large White	PC aa C36:5 / SM C16:0	6	ALGA0034962	29065531	A	G	0.067	-0.0272757	0.00321203	1.01707e-16	1.06126e+08	4/97/686	11.4771
Ratio	Large White	PC aa C38:6 / PC ae C38:2	6	ALGA0034962	29065531	A	G	0.067	-0.153405	0.0188183	1.41741e-15	1.0001e+08	4/97/686	9.1135
Ratio	Large White	PC aa C36:5 / SM C16:1	6	ALGA0034962	29065531	A	G	0.067	-0.150716	0.0177932	1.20287e-16	8.97339e+07	4/97/686	12.6853
Ratio	Large White	PC aa C34:4 / PC ae C42:4	6	ALGA0034962	29065531	A	G	0.067	-0.150884	0.0207146	7.91509e-13	8.77779e+07	4/97/686	8.61445
Ratio	Large White	PC aa C36:5 / PC ae C42:4	6	ALGA0034962	29065531	A	G	0.067	-0.254071	0.0300149	1.25698e-16	8.58706e+07	4/97/686	10.0028
Ratio	Large White	PC ae C42:5 / lysoPC a C16:0	6	ALGA0034962	29065531	A	G	0.067	1.72947	0.188866	4.56107e-19	7.8376e+07	4/97/686	21.0555
Ratio	Large White	PC aa C32:2 / PC aa C40:5	6	ALGA0034962	29065531	A	G	0.067	-0.0953624	0.0078125	1.70737e-31	7.51057e+07	4/97/686	15.718
Ratio	Large White	PC aa C34:2 / SM C16:1	6	ALGA0034962	29065531	A	G	0.067	-0.983312	0.113764	3.05122e-17	7.013e+07	4/97/686	15.6294
Ratio	Large White	PC aa C34:3 / PC ae C32:2	6	ALGA0034962	29065531	A	G	0.067	-0.218835	0.028012	1.80757e-14	6.30177e+07	4/97/686	4.76848
Ratio	Large White	PC aa C34:4 / PC aa C38:0	6	ALGA0034962	29065531	A	G	0.067	-0.137908	0.0190725	1.14403e-12	6.07301e+07	4/97/686	4.5697
Ratio	Large White	PC aa C36:5 / PC ae C32:1	6	ALGA0034962	29065531	A	G	0.067	-0.22881	0.0272076	1.93484e-16	5.57865e+07	4/97/686	7.08536
Ratio	Large White	PC aa C34:2 / PC aa C42:5	6	ALGA0034962	29065531	A	G	0.067	-0.879043	0.102058	3.88485e-17	5.50811e+07	4/97/686	7.01685
Ratio	Large White	PC aa C34:1 / PC aa C40:2	6	ALGA0034962	29065531	A	G	0.067	-0.210753	0.0314654	4.0357e-11	5.34828e+07	4/97/686	4.02828
Ratio	Large White	PC aa C36:5 / PC aa C40:3	6	ALGA0034962	29065531	A	G	0.067	-0.141744	0.0168767	2.10877e-16	5.11854e+07	4/97/686	8.74475
Ratio	Large White	PC aa C32:2 / PC aa C40:2	6	ALGA0034962	29065531	A	G	0.067	-0.146735	0.0214133	1.47004e-11	5.01506e+07	4/97/686	9.29708
Ratio	Large White	PC aa C36:0 / PC aa C38:5	6	ALGA0034962	29065531	A	G	0.067	0.0153306	0.00170463	1.77611e-18	4.99759e+07	4/97/686	9.58722
Ratio	Large White	PC aa C38:6 / PC aa C42:0	6	ALGA0034962	29065531	A	G	0.067	-0.488012	0.060609	3.02887e-15	4.68015e+07	4/97/686	28.3853
Ratio	Large White	PC aa C32:2 / PC ae C40:3	6	ALGA0034962	29065531	A	G	0.067	-0.138537	0.020249	1.57889e-11	4.6693e+07	4/97/686	18.9493
Ratio	Large White	PC aa C34:3 / PC aa C36:0	6	ALGA0034962	29065531	A	G	0.067	-0.0563205	0.0072475	2.44558e-14	4.65775e+07	4/97/686	5.9133
Ratio	Large White	PC aa C34:2 / PC aa C38:0	6	ALGA0034962	29065531	A	G	0.067	-0.929561	0.108226	4.70514e-17	4.54783e+07	4/97/686	7.31437
Ratio	Large White	PC aa C34:3 / PC aa C40:6	6	ALGA0034962	29065531	A	G	0.067	-0.230028	0.0296135	2.50618e-14	4.54513e+07	4/97/686	19.462
Ratio	Large White	PC aa C32:2 / PC aa C38:3	6	ALGA0034962	29065531	A	G	0.067	-0.161196	0.0224898	1.76749e-12	4.35717e+07	4/97/686	13.4342
Ratio	Large White	PC aa C36:2 / PC ae C34:1	6	ALGA0034962	29065531	A	G	0.067	0.163118	0.0173254	5.1514e-20	4.17944e+07	4/97/686	12.0687
Ratio	Large White	PC aa C38:6 / PC ae C38:1	6	ALGA0034962	29065531	A	G	0.067	-0.236662	0.0294538	3.43701e-15	4.12439e+07	4/97/686	19.4536
Ratio	Large White	PC aa C36:3 / PC ae C40:4	6	ALGA0034962	29065531	A	G	0.067	-0.211883	0.0292869	1.11286e-12	4.04475e+07	4/97/686	8.40408
Ratio	Large White	PC aa C34:2 / PC ae C34:0	6	ALGA0034962	29065531	A	G	0.067	-0.73921	0.0862554	5.47562e-17	3.9079e+07	4/97/686	4.08444
Ratio	Large White	PC aa C34:3 / PC ae C42:4	6	ALGA0034962	29065531	A	G	0.067	-0.165674	0.0213859	2.91866e-14	3.90279e+07	4/97/686	7.58158
Ratio	Large White	PC aa C34:4 / PC aa C42:5	6	ALGA0034962	29065531	A	G	0.067	-0.184319	0.0257406	1.85227e-12	3.75091e+07	4/97/686	16.4173
Ratio	Large White	PC aa C36:5 / PC ae C36:5	6	ALGA0034962	29065531	A	G	0.067	-0.184034	0.0220204	2.911e-16	3.70793e+07	4/97/686	8.01829
Ratio	Large White	PC aa C36:0 / PC aa C36:5	6	ALGA0034962	29065531	A	G	0.067	0.10535	0.0126137	3.03611e-16	3.55514e+07	4/97/686	6.2803
Ratio	Large White	PC aa C36:5 / PC aa C42:1	6	ALGA0034962	29065531	A	G	0.067	-0.311441	0.0373065	3.1282e-16	3.45048e+07	4/97/686	17.9237
Ratio	Large White	PC aa C34:3 / PC ae C40:4	6	ALGA0034962	29065531	A	G	0.067	-0.187632	0.0242751	3.31633e-14	3.4348e+07	4/97/686	6.01016
Ratio	Large White	PC aa C40:2 / lysoPC a C16:0	6	ALGA0034962	29065531	A	G	0.067	0.584754	0.0646425	1.15138e-18	3.10479e+07	4/97/686	13.1894
Ratio	Large White	PC aa C42:4 / lysoPC a C17:0	6	ALGA0034962	29065531	A	G	0.067	0.197726	0.0277575	2.39044e-12	3.09799e+07	4/97/686	14.2291
Ratio	Large White	PC aa C36:2 / lysoPC a C16:1	6	ALGA0034962	29065531	A	G	0.067	0.0539168	0.00575162	7.29556e-20	2.9511e+07	4/97/686	9.64106
Ratio	Large White	PC aa C40:5 / lysoPC a C17:0	6	ALGA0034962	29065531	A	G	0.067	0.0641492	0.00529508	4.38144e-31	2.92674e+07	4/97/686	7.68147
Ratio	Large White	PC ae C36:1 / PC ae C38:1	6	ALGA0034962	29065531	A	G	0.067	-0.078162	0.0114596	1.81272e-11	2.72662e+07	4/97/686	12.1649
Ratio	Large White	PC aa C34:3 / PC ae C42:5	6	ALGA0034962	29065531	A	G	0.067	-0.282407	0.0366998	4.25826e-14	2.67501e+07	4/97/686	7.67964
Ratio	Large White	PC aa C32:2 / PC aa C42:4	6	ALGA0034962	29065531	A	G	0.067	-0.15596	0.0230865	2.77778e-11	2.65404e+07	4/97/686	8.46773
Ratio	Large White	PC aa C38:5 / PC ae C36:3	6	ALGA0034962	29065531	A	G	0.067	-0.236449	0.0265387	3.5408e-18	2.50685e+07	4/97/686	8.13502
Ratio	Large White	PC aa C38:4 / PC ae C38:4	6	ALGA0034962	29065531	A	G	0.067	0.583563	0.0675207	3.0683e-17	2.3725e+07	4/97/686	6.80399
Ratio	Large White	PC aa C34:1 / PC ae C40:3	6	ALGA0034962	29065531	A	G	0.067	-0.379053	0.058035	1.17145e-10	2.27753e+07	4/97/686	12.4545
Ratio	Large White	PC aa C36:3 / PC ae C42:4	6	ALGA0034962	29065531	A	G	0.067	-0.16598	0.0232274	2.0497e-12	2.19605e+07	4/97/686	5.46269
Ratio	Large White	PC aa C34:3 / PC aa C42:5	6	ALGA0034962	29065531	A	G	0.067	-0.23943	0.0312337	5.26738e-14	2.16254e+07	4/97/686	5.87651
Ratio	Large White	PC aa C38:5 / PC ae C32:2	6	ALGA0034962	29065531	A	G	0.067	-1.52521	0.171547	4.12604e-18	2.15128e+07	4/97/686	5.25949
Ratio	Large White	PC aa C36:3 / PC aa C42:5	6	ALGA0034962	29065531	A	G	0.067	-0.327592	0.0458679	2.10353e-12	2.13986e+07	4/97/686	5.23731
Ratio	Large White	PC aa C34:2 / PC aa C42:2	6	ALGA0034962	29065531	A	G	0.067	-0.272958	0.0321746	1.08407e-16	1.97387e+07	4/97/686	7.32711
Ratio	Large White	PC aa C36:5 / PC ae C40:2	6	ALGA0034962	29065531	A	G	0.067	-0.376674	0.045533	5.61889e-16	1.92098e+07	4/97/686	15.0612
Ratio	Large White	PC ae C40:3 / lysoPC a C17:0	6	ALGA0034962	29065531	A	G	0.067	0.201738	0.0286087	3.88849e-12	1.90449e+07	4/97/686	15.4989
Ratio	Large White	PC aa C34:4 / PC ae C32:1	6	ALGA0034962	29065531	A	G	0.067	-0.0896466	0.0127025	3.74075e-12	1.8573e+07	4/97/686	8.34484
Ratio	Large White	PC ae C40:2 / lysoPC a C16:0	6	ALGA0034962	29065531	A	G	0.067	2.31444	0.257665	1.94767e-18	1.83542e+07	4/97/686	8.00003
Ratio	Large White	PC aa C34:2 / PC ae C36:2	6	ALGA0034962	29065531	A	G	0.067	-0.152217	0.0179672	1.18856e-16	1.80035e+07	4/97/686	4.48819
Ratio	Large White	PC aa C36:4 / lysoPC a C18:1	6	ALGA0034962	29065531	A	G	0.067	-0.351258	0.0314806	6.22069e-27	1.78383e+07	4/97/686	9.6289
Ratio	Large White	PC aa C36:4 / PC ae C38:4	6	ALGA0034962	29065531	A	G	0.067	-0.837031	0.0750489	6.51499e-27	1.70325e+07	4/97/686	13.4066
Ratio	Large White	PC aa C36:3 / PC ae C32:1	6	ALGA0034962	29065531	A	G	0.067	-0.364106	0.0512343	2.67718e-12	1.68135e+07	4/97/686	10.998
Ratio	Large White	PC aa C36:1 / lysoPC a C18:1	6	ALGA0034962	29065531	A	G	0.067	0.193223	0.0182446	1.38132e-24	1.51476e+07	4/97/686	9.03348
Ratio	Large White	PC aa C38:5 / SM C20:2	6	ALGA0034962	29065531	A	G	0.067	-0.13202	0.0149293	6.09996e-18	1.45514e+07	4/97/686	5.37945
Ratio	Large White	PC aa C34:3 / PC ae C36:3	6	ALGA0034962	29065531	A	G	0.067	-0.133127	0.0175121	8.34804e-14	1.3645e+07	4/97/686	7.52004
Ratio	Large White	PC aa C34:2 / PC ae C34:2	6	ALGA0034962	29065531	A	G	0.067	-0.436203	0.0517391	1.64145e-16	1.30361e+07	4/97/686	8.71368
Ratio	Large White	PC aa C38:6 / PC ae C42:5	6	ALGA0034962	29065531	A	G	0.067	-0.516859	0.0655846	1.08874e-14	1.30202e+07	4/97/686	5.1243
Ratio	Large White	PC aa C38:5 / PC aa C42:2	6	ALGA0034962	29065531	A	G	0.067	-0.485562	0.0549974	6.84453e-18	1.29684e+07	4/97/686	8.24563
Ratio	Large White	PC aa C34:4 / PC aa C40:6	6	ALGA0034962	29065531	A	G	0.067	-0.124679	0.017333	1.48209e-12	1.26461e+07	4/97/686	5.6306
Ratio	Large White	PC aa C38:3 / PC aa C38:6	6	ALGA0034962	29065531	A	G	0.067	0.227683	0.0289741	1.28727e-14	1.10121e+07	4/97/686	4.23563
Ratio	Large White	PC aa C36:5 / PC ae C32:2	6	ALGA0034962	29065531	A	G	0.067	-0.233292	0.0284934	1.07928e-15	1.00009e+07	4/97/686	9.70796
Ratio	Large White	PC aa C36:1 / PC aa C36:6	6	ALGA0034962	29065531	A	G	0.067	0.0806995	0.00765202	2.09254e-24	9.9992e+06	4/97/686	6.08693
Ratio	Large White	PC aa C38:4 / lysoPC a C17:0	6	ALGA0034962	29065531	A	G	0.067	0.0462521	0.00542061	7.36272e-17	9.88703e+06	4/97/686	11.001
Ratio	Large White	PC aa C34:3 / PC ae C38:6	6	ALGA0034962	29065531	A	G	0.067	-0.216644	0.0287116	1.25193e-13	9.09864e+06	4/97/686	11.2821
Ratio	Large White	PC aa C32:3 / PC aa C36:4	6	ALGA0034962	29065531	A	G	0.067	12.5534	1.13288	1.30923e-26	8.47572e+06	4/97/686	7.57904
Ratio	Large White	PC aa C34:4 / PC ae C38:6	6	ALGA0034962	29065531	A	G	0.067	-0.0959921	0.0138496	8.73561e-12	7.9533e+06	4/97/686	9.11571
Ratio	Large White	PC aa C32:1 / PC ae C38:1	6	ALGA0034962	29065531	A	G	0.067	-0.134472	0.020283	6.25986e-11	7.89571e+06	4/97/686	11.1647
Ratio	Large White	PC aa C36:5 / SM C18:1	6	ALGA0034962	29065531	A	G	0.067	-0.143441	0.0175999	1.43696e-15	7.51154e+06	4/97/686	4.49468
Ratio	Large White	PC aa C36:3 / PC aa C38:0	6	ALGA0034962	29065531	A	G	0.067	-0.329975	0.0472268	6.00828e-12	7.49175e+06	4/97/686	8.41155
Ratio	Large White	PC aa C34:1 / PC aa C42:4	6	ALGA0034962	29065531	A	G	0.067	-0.152125	0.0235177	1.74212e-10	6.4644e+06	4/97/686	14.9084
Ratio	Large White	PC aa C38:6 / PC ae C36:5	6	ALGA0034962	29065531	A	G	0.067	-0.193328	0.0248347	2.21383e-14	6.40317e+06	4/97/686	13.645
Ratio	Large White	PC aa C36:4 / PC ae C38:0	6	ALGA0034962	29065531	A	G	0.067	-0.620645	0.0561594	1.74074e-26	6.37468e+06	4/97/686	10.7922
Ratio	Large White	PC aa C36:1 / PC ae C38:4	6	ALGA0034962	29065531	A	G	0.067	0.100164	0.0095483	3.51889e-24	5.94611e+06	4/97/686	11.3252
Ratio	Large White	PC aa C36:1 / PC ae C38:0	6	ALGA0034962	29065531	A	G	0.067	0.0830508	0.00791924	3.61954e-24	5.78077e+06	4/97/686	6.12771
Ratio	Large White	PC aa C38:5 / PC ae C36:4	6	ALGA0034962	29065531	A	G	0.067	-0.653999	0.0749235	1.53675e-17	5.77601e+06	4/97/686	4.34248
Ratio	Large White	lysoPC a C16:0 / SM C16:1	6	ALGA0034962	29065531	A	G	0.067	-0.605848	0.0685314	6.22738e-18	5.74043e+06	4/97/686	16.7198
Ratio	Large White	PC aa C36:4 / SM C18:0	6	ALGA0034962	29065531	A	G	0.067	-0.630437	0.0571102	1.96417e-26	5.64952e+06	4/97/686	13.5447
Ratio	Large White	PC aa C34:3 / PC aa C42:1	6	ALGA0034962	29065531	A	G	0.067	-0.248158	0.0332135	2.12003e-13	5.37298e+06	4/97/686	14.2213
Ratio	Large White	PC aa C36:4 / PC ae C30:0	6	ALGA0034962	29065531	A	G	0.067	-3.16321	0.286732	2.10102e-26	5.28155e+06	4/97/686	8.8334
Ratio	Large White	PC aa C36:3 / PC ae C36:3	6	ALGA0034962	29065531	A	G	0.067	-0.217019	0.0313013	8.60843e-12	5.2289e+06	4/97/686	16.904
Ratio	Large White	PC aa C34:4 / PC ae C32:2	6	ALGA0034962	29065531	A	G	0.067	-0.112423	0.0163955	1.42782e-11	4.86595e+06	4/97/686	7.84939
Ratio	Large White	PC ae C38:4 / PC ae C42:4	6	ALGA0034962	29065531	A	G	0.067	-0.0203444	0.00327474	8.46211e-10	4.8006e+06	4/97/686	10.0754
Ratio	Large White	PC aa C34:3 / SM C16:1	6	ALGA0034962	29065531	A	G	0.067	-0.146896	0.0197037	2.38113e-13	4.78382e+06	4/97/686	8.18504
Ratio	Large White	PC aa C34:3 / SM C16:0	6	ALGA0034962	29065531	A	G	0.067	-0.0344585	0.004623	2.40663e-13	4.73314e+06	4/97/686	6.37401
Ratio	Large White	PC aa C34:1 / PC aa C36:0	6	ALGA0034962	29065531	A	G	0.067	-0.00335555	0.000534536	5.69566e-10	4.37391e+06	4/97/686	8.22582
Ratio	Large White	PC aa C32:1 / PC ae C38:2	6	ALGA0034962	29065531	A	G	0.067	-0.146496	0.0225705	1.51654e-10	4.24484e+06	4/97/686	8.88932
Ratio	Large White	PC aa C38:5 / SM C18:0	6	ALGA0034962	29065531	A	G	0.067	-0.331515	0.0381743	2.20034e-17	4.03404e+06	4/97/686	14.1341
Ratio	Large White	PC aa C34:4 / PC aa C42:1	6	ALGA0034962	29065531	A	G	0.067	-0.160558	0.0235536	1.86077e-11	3.73377e+06	4/97/686	8.52609
Ratio	Large White	PC aa C36:3 / PC aa C40:6	6	ALGA0034962	29065531	A	G	0.067	-0.252809	0.0360658	5.16006e-12	3.63224e+06	4/97/686	14.2312
Ratio	Large White	PC ae C38:2 / PC ae C38:3	6	ALGA0034962	29065531	A	G	0.067	0.0771737	0.011936	1.7744e-10	3.62798e+06	4/97/686	8.66856
Ratio	Large White	PC aa C34:3 / PC ae C40:2	6	ALGA0034962	29065531	A	G	0.067	-0.257014	0.0346566	3.14105e-13	3.62646e+06	4/97/686	8.17981
Ratio	Large White	PC aa C40:2 / lysoPC a C17:0	6	ALGA0034962	29065531	A	G	0.067	0.177294	0.0260869	2.12717e-11	3.48142e+06	4/97/686	9.52038
Ratio	Large White	PC aa C32:2 / PC ae C32:1	6	ALGA0034962	29065531	A	G	0.067	-0.108018	0.0168164	2.31125e-10	3.18977e+06	4/97/686	9.86094
Ratio	Large White	PC aa C32:1 / PC aa C40:4	6	ALGA0034962	29065531	A	G	0.067	-0.192162	0.0245486	1.61089e-14	2.96817e+06	4/97/686	21.0465
Ratio	Large White	PC aa C36:3 / PC ae C42:5	6	ALGA0034962	29065531	A	G	0.067	-0.316269	0.0461956	1.53142e-11	2.93928e+06	4/97/686	4.43924
Ratio	Large White	PC aa C36:5 / PC ae C36:3	6	ALGA0034962	29065531	A	G	0.067	-0.171253	0.0214075	4.48346e-15	2.40747e+06	4/97/686	13.3103
Ratio	Large White	PC aa C34:4 / PC ae C40:2	6	ALGA0034962	29065531	A	G	0.067	-0.105848	0.0156962	3.00159e-11	2.31467e+06	4/97/686	6.59394
Ratio	Large White	PC aa C34:2 / SM (OH) C14:1	6	ALGA0034962	29065531	A	G	0.067	-3.47849	0.424014	9.53906e-16	2.24322e+06	4/97/686	6.84082
Ratio	Large White	PC aa C34:2 / PC ae C38:3	6	ALGA0034962	29065531	A	G	0.067	-0.533291	0.0650497	9.94952e-16	2.15068e+06	4/97/686	8.57051
Ratio	Large White	PC aa C38:5 / PC ae C34:3	6	ALGA0034962	29065531	A	G	0.067	-0.21267	0.0247232	4.24544e-17	2.09078e+06	4/97/686	8.87523
Ratio	Large White	PC aa C34:1 / PC ae C42:4	6	ALGA0034962	29065531	A	G	0.067	-0.0514527	0.00846085	1.86282e-09	1.60185e+06	4/97/686	10.3294
Ratio	Large White	PC aa C38:5 / SM (OH) C14:1	6	ALGA0034962	29065531	A	G	0.067	-2.06761	0.241479	5.82227e-17	1.52454e+06	4/97/686	9.34261
Ratio	Large White	PC aa C34:4 / PC aa C36:0	6	ALGA0034962	29065531	A	G	0.067	-0.34456	0.0516279	4.71341e-11	1.47403e+06	4/97/686	8.10628
Ratio	Large White	PC aa C36:3 / PC ae C32:2	6	ALGA0034962	29065531	A	G	0.067	-0.25987	0.0385561	3.0706e-11	1.46592e+06	4/97/686	8.66983
Ratio	Large White	PC aa C38:4 / PC ae C38:0	6	ALGA0034962	29065531	A	G	0.067	0.210773	0.025447	5.19111e-16	1.40231e+06	4/97/686	16.4092
Ratio	Large White	PC aa C34:1 / PC aa C42:5	6	ALGA0034962	29065531	A	G	0.067	-0.261164	0.0413837	4.64335e-10	1.36758e+06	4/97/686	8.67346
Ratio	Large White	PC aa C34:2 / PC aa C42:1	6	ALGA0034962	29065531	A	G	0.067	-0.790441	0.0971603	1.60693e-15	1.33162e+06	4/97/686	7.30678
Ratio	Large White	PC aa C40:6 / PC ae C38:0	6	ALGA0034962	29065531	A	G	0.067	0.167976	0.0245575	1.59533e-11	1.17484e+06	4/97/686	31.335
Ratio	Large White	PC aa C42:5 / lysoPC a C17:0	6	ALGA0034962	29065531	A	G	0.067	0.26224	0.0396433	6.88285e-11	1.07595e+06	4/97/686	11.3875
Ratio	Large White	PC aa C36:3 / PC aa C40:3	6	ALGA0034962	29065531	A	G	0.067	-0.0656759	0.00981844	4.27461e-11	1.05302e+06	4/97/686	4.05166
Ratio	Large White	PC aa C42:4 / lysoPC a C16:1	6	ALGA0034962	29065531	A	G	0.067	0.077137	0.0125019	1.09441e-09	1.02902e+06	4/97/686	6.11673
Ratio	Large White	PC ae C40:4 / lysoPC a C17:0	6	ALGA0034962	29065531	A	G	0.067	0.130677	0.0197993	7.57243e-11	977966	4/97/686	22.9231
Ratio	Large White	PC ae C40:4 / lysoPC a C16:0	6	ALGA0034962	29065531	A	G	0.067	0.38887	0.04512	3.72087e-17	960738	4/97/686	11.2544
Ratio	Large White	PC aa C32:1 / PC aa C38:3	6	ALGA0034962	29065531	A	G	0.067	-0.120801	0.0183289	8.03654e-11	958279	4/97/686	6.69484
Ratio	Large White	PC aa C36:5 / PC aa C42:0	6	ALGA0034962	29065531	A	G	0.067	-0.280644	0.0356394	1.14031e-14	946567	4/97/686	7.46486
Ratio	Large White	PC aa C38:6 / PC ae C42:4	6	ALGA0034962	29065531	A	G	0.067	-0.287612	0.0382738	1.56166e-13	907721	4/97/686	18.3015
Ratio	Large White	PC aa C38:6 / PC ae C40:4	6	ALGA0034962	29065531	A	G	0.067	-0.238271	0.0317453	1.66369e-13	852055	4/97/686	5.85897
Ratio	Large White	PC aa C34:2 / PC aa C40:6	6	ALGA0034962	29065531	A	G	0.067	-0.411772	0.0511981	3.24358e-15	659709	4/97/686	16.7101
Ratio	Large White	PC aa C34:4 / SM C16:0	6	ALGA0034962	29065531	A	G	0.067	-0.0165834	0.00253417	1.0825e-10	641818	4/97/686	10.937
Ratio	Large White	PC aa C34:1 / PC ae C40:4	6	ALGA0034962	29065531	A	G	0.067	-0.200506	0.033861	4.77432e-09	625002	4/97/686	10.9502
Ratio	Large White	PC aa C32:0 / PC aa C34:2	6	ALGA0034962	29065531	A	G	0.067	4.82926	0.601134	3.47484e-15	615804	4/97/686	6.31576
Ratio	Large White	PC aa C36:3 / PC aa C42:1	6	ALGA0034962	29065531	A	G	0.067	-0.380592	0.057708	7.81488e-11	575986	4/97/686	6.48488
Ratio	Large White	PC aa C38:6 / PC ae C44:3	6	ALGA0034962	29065531	A	G	0.067	-1.2317	0.165401	2.52834e-13	560667	4/97/686	10.1069
Ratio	Large White	PC aa C32:2 / PC aa C36:0	6	ALGA0034962	29065531	A	G	0.067	-0.159871	0.0260414	1.31813e-09	559304	4/97/686	15.7121
Ratio	Large White	PC aa C38:6 / SM C16:1	6	ALGA0034962	29065531	A	G	0.067	-0.209748	0.0281805	2.59595e-13	546063	4/97/686	7.61927
Ratio	Large White	PC aa C32:2 / PC aa C38:4	6	ALGA0034962	29065531	A	G	0.067	-0.136688	0.0167659	1.40842e-15	516861	4/97/686	11.0045
Ratio	Large White	PC aa C34:1 / lysoPC a C18:0	6	ALGA0034962	29065531	A	G	0.067	-0.2454	0.0261295	6.28401e-20	516518	4/97/686	20.7827
Ratio	Large White	PC ae C36:2 / PC ae C40:3	6	ALGA0034962	29065531	A	G	0.067	-0.267835	0.0453966	5.41134e-09	493041	4/97/686	12.5402
Ratio	Large White	PC aa C32:2 / PC aa C42:5	6	ALGA0034962	29065531	A	G	0.067	-0.216474	0.0352628	1.32006e-09	481051	4/97/686	11.8411
Ratio	Large White	PC aa C40:6 / lysoPC a C16:0	6	ALGA0034962	29065531	A	G	0.067	0.360621	0.0422998	7.79942e-17	458339	4/97/686	25.9058
Ratio	Large White	PC aa C38:3 / PC ae C36:2	6	ALGA0034962	29065531	A	G	0.067	0.124121	0.0191974	1.77589e-10	433657	4/97/686	5.61381
Ratio	Large White	PC aa C36:2 / PC ae C36:1	6	ALGA0034962	29065531	A	G	0.067	0.157227	0.0177307	4.99748e-18	430816	4/97/686	10.0444
Ratio	Large White	PC aa C34:3 / SM C20:2	6	ALGA0034962	29065531	A	G	0.067	-0.0763486	0.0107472	2.72514e-12	417993	4/97/686	12.4445
Ratio	Large White	PC aa C38:5 / SM C24:0	6	ALGA0034962	29065531	A	G	0.067	-0.460123	0.0547936	2.13201e-16	416333	4/97/686	4.67488
Ratio	Large White	PC ae C38:2 / lysoPC a C16:1	6	ALGA0034962	29065531	A	G	0.067	0.127976	0.0209402	1.55546e-09	413863	4/97/686	5.84079
Ratio	Large White	PC aa C32:2 / PC ae C42:4	6	ALGA0034962	29065531	A	G	0.067	-0.145421	0.0238948	1.81244e-09	406762	4/97/686	8.3577
Ratio	Large White	PC aa C32:2 / PC ae C32:2	6	ALGA0034962	29065531	A	G	0.067	-0.132047	0.0217344	1.92799e-09	382385	4/97/686	9.72758
Ratio	Large White	PC aa C34:2 / PC ae C30:0	6	ALGA0034962	29065531	A	G	0.067	-0.990741	0.124341	5.6892e-15	376120	4/97/686	13.8914
Ratio	Large White	PC aa C42:5 / lysoPC a C16:0	6	ALGA0034962	29065531	A	G	0.067	0.797668	0.093847	9.55372e-17	374177	4/97/686	6.57626
Ratio	Large White	lysoPC a C16:0 / SM C24:0	6	ALGA0034962	29065531	A	G	0.067	-0.498382	0.0586499	9.71341e-17	368026	4/97/686	5.48093
Ratio	Large White	PC aa C36:5 / PC ae C38:5	6	ALGA0034962	29065531	A	G	0.067	-0.110445	0.0142585	2.93979e-14	367162	4/97/686	9.16237
Ratio	Large White	PC aa C34:2 / PC aa C40:3	6	ALGA0034962	29065531	A	G	0.067	-0.115507	0.0145083	5.97183e-15	358319	4/97/686	5.14187
Ratio	Large White	PC aa C36:3 / PC ae C40:2	6	ALGA0034962	29065531	A	G	0.067	-0.322614	0.049483	1.26206e-10	356659	4/97/686	4.98152
Ratio	Large White	PC ae C36:2 / PC ae C40:4	6	ALGA0034962	29065531	A	G	0.067	-0.148646	0.0267215	3.64523e-08	317840	4/97/686	6.53176
Ratio	Large White	PC aa C34:1 / SM C16:0	6	ALGA0034962	29065531	A	G	0.067	-0.116737	0.0201136	9.40913e-09	317135	4/97/686	14.3811
Ratio	Large White	PC aa C32:0 / PC aa C40:5	6	ALGA0034962	29065531	A	G	0.067	-0.294621	0.0252602	4.26305e-29	300802	4/97/686	8.77236
Ratio	Large White	PC aa C36:5 / SM (OH) C14:1	6	ALGA0034962	29065531	A	G	0.067	-0.200468	0.0260129	3.91872e-14	275442	4/97/686	17.1302
Ratio	Large White	PC aa C36:5 / PC aa C42:2	6	ALGA0034962	29065531	A	G	0.067	-0.199309	0.025877	4.04417e-14	266898	4/97/686	8.43313
Ratio	Large White	PC aa C38:6 / SM C18:1	6	ALGA0034962	29065531	A	G	0.067	-0.301176	0.0410352	5.37602e-13	263681	4/97/686	14.1091
Ratio	Large White	PC aa C40:6 / lysoPC a C16:1	6	ALGA0034962	29065531	A	G	0.067	0.164369	0.0248672	7.11285e-11	263503	4/97/686	12.3017
Ratio	Large White	PC aa C34:3 / PC aa C40:3	6	ALGA0034962	29065531	A	G	0.067	-0.0985062	0.0140064	4.41115e-12	258230	4/97/686	17.9147
Ratio	Large White	PC ae C40:4 / PC ae C40:5	6	ALGA0034962	29065531	A	G	0.067	0.0422911	0.00765615	4.51657e-08	256522	4/97/686	6.16895
Ratio	Large White	PC aa C36:4 / PC ae C42:0	6	ALGA0034962	29065531	A	G	0.067	-3.51523	0.328096	4.34087e-25	255632	4/97/686	16.4797
Ratio	Large White	PC aa C34:2 / SM C20:2	6	ALGA0034962	29065531	A	G	0.067	-0.0823207	0.0103993	8.38164e-15	255298	4/97/686	7.11219
Ratio	Large White	PC aa C34:1 / PC aa C38:0	6	ALGA0034962	29065531	A	G	0.067	-0.249887	0.0433469	1.17581e-08	253779	4/97/686	16.0579
Ratio	Large White	PC aa C38:6 / PC aa C40:3	6	ALGA0034962	29065531	A	G	0.067	-0.0954933	0.0130446	6.1377e-13	230958	4/97/686	11.5296
Ratio	Large White	PC aa C34:1 / PC ae C32:1	6	ALGA0034962	29065531	A	G	0.067	-0.859375	0.149523	1.29765e-08	229952	4/97/686	15.4489
Ratio	Large White	PC ae C40:3 / lysoPC a C16:1	6	ALGA0034962	29065531	A	G	0.067	0.109728	0.0189542	1.02401e-08	229438	4/97/686	6.05697
Ratio	Large White	PC ae C38:1 / lysoPC a C16:1	6	ALGA0034962	29065531	A	G	0.067	0.12152	0.0200976	2.29078e-09	215761	4/97/686	17.2287
Ratio	Large White	PC aa C36:1 / PC ae C38:3	6	ALGA0034962	29065531	A	G	0.067	0.104432	0.0103119	9.7765e-23	214020	4/97/686	14.9468
Ratio	Large White	PC aa C32:2 / PC aa C38:0	6	ALGA0034962	29065531	A	G	0.067	-0.163312	0.0273225	3.44688e-09	213885	4/97/686	12.8658
Ratio	Large White	PC aa C36:4 / PC ae C36:2	6	ALGA0034962	29065531	A	G	0.067	-0.333744	0.0312118	5.29849e-25	209431	4/97/686	15.0416
Ratio	Large White	PC aa C34:2 / PC ae C38:6	6	ALGA0034962	29065531	A	G	0.067	-1.06457	0.134958	1.0306e-14	207629	4/97/686	12.3824
Ratio	Large White	PC aa C36:6 / PC ae C38:1	6	ALGA0034962	29065531	A	G	0.067	-0.146711	0.0242907	2.38268e-09	207438	4/97/686	13.3481
Ratio	Large White	PC aa C34:3 / PC aa C42:2	6	ALGA0034962	29065531	A	G	0.067	-0.119982	0.0171438	5.56039e-12	204858	4/97/686	7.92369
Ratio	Large White	PC aa C36:3 / SM C16:0	6	ALGA0034962	29065531	A	G	0.067	-0.0925389	0.014393	2.22567e-10	202243	4/97/686	20.5057
Ratio	Large White	PC aa C36:5 / PC ae C34:3	6	ALGA0034962	29065531	A	G	0.067	-0.191443	0.025005	5.64645e-14	191161	4/97/686	14.0684
Ratio	Large White	PC aa C34:2 / SM C24:0	6	ALGA0034962	29065531	A	G	0.067	-0.346124	0.0439445	1.12493e-14	190219	4/97/686	8.80046
Ratio	Large White	PC aa C34:4 / PC aa C40:3	6	ALGA0034962	29065531	A	G	0.067	-0.175067	0.0275813	3.70759e-10	187391	4/97/686	17.0276
Ratio	Large White	PC aa C42:5 / lysoPC a C16:1	6	ALGA0034962	29065531	A	G	0.067	0.119901	0.0200593	3.44455e-09	184353	4/97/686	11.1968
Ratio	Large White	PC aa C32:3 / PC aa C36:5	6	ALGA0034962	29065531	A	G	0.067	0.733369	0.0959	6.02413e-14	179176	4/97/686	7.61084
Ratio	Large White	PC aa C38:5 / PC ae C42:0	6	ALGA0034962	29065531	A	G	0.067	-3.93404	0.475372	5.48344e-16	161874	4/97/686	4.24603
Ratio	Large White	PC aa C36:3 / SM C16:1	6	ALGA0034962	29065531	A	G	0.067	-0.293013	0.0458332	2.7928e-10	161174	4/97/686	10.6609
Ratio	Large White	PC aa C36:5 / PC aa C42:6	6	ALGA0034962	29065531	A	G	0.067	-0.258468	0.0338875	6.96055e-14	155071	4/97/686	4.53087
Ratio	Large White	PC aa C38:6 / SM C16:0	6	ALGA0034962	29065531	A	G	0.067	-0.0691437	0.00952117	9.21061e-13	153904	4/97/686	19.5321
Ratio	Large White	PC aa C36:2 / PC ae C38:0	6	ALGA0034962	29065531	A	G	0.067	0.144864	0.0165893	1.49393e-17	144116	4/97/686	17.1249
Ratio	Large White	PC aa C34:4 / SM C16:1	6	ALGA0034962	29065531	A	G	0.067	-0.0893675	0.0141764	4.84283e-10	143463	4/97/686	9.41837
Ratio	Large White	PC aa C32:2 / PC ae C40:4	6	ALGA0034962	29065531	A	G	0.067	-0.109083	0.0184653	5.17912e-09	142347	4/97/686	7.78644
Ratio	Large White	PC ae C42:4 / lysoPC a C16:0	6	ALGA0034962	29065531	A	G	0.067	0.373539	0.0445958	2.51739e-16	142003	4/97/686	5.2896
Single	Large White	PC aa C40:5	6	H3GA0017731	29078984	A	G	0.16	0.344561	0.0496346	8.12138e-12	-	15/222/550	3.70849
Single	Large White	PC aa C36:1	6	H3GA0017731	29078984	A	G	0.16	0.475584	0.0691408	1.23817e-11	-	15/222/550	2.2945
Single	Large White	PC aa C36:2	6	H3GA0017731	29078984	A	G	0.16	1.12338	0.19194	7.10632e-09	-	15/222/550	3.7658
Single	Large White	lysoPC a C18:0	6	H3GA0017731	29078984	A	G	0.16	1.45209	0.261663	3.92307e-08	-	15/222/550	5.77003
Single	Large White	PC aa C36:4	6	H3GA0017731	29078984	A	G	0.16	-2.01249	0.365547	4.99424e-08	-	15/222/550	5.67095
Single	Large White	PC aa C38:4	6	H3GA0017731	29078984	A	G	0.16	10.6239	2.17143	1.20838e-06	-	15/222/550	2.24894
Ratio	Large White	PC aa C36:2 / PC aa C36:4	6	H3GA0017731	29078984	A	G	0.16	0.0247049	0.00209707	1.3134e-29	5.41064e+20	15/222/550	4.86209
Ratio	Large White	PC aa C36:1 / PC aa C36:4	6	H3GA0017731	29078984	A	G	0.16	0.341358	0.0278464	9.95177e-32	1.24417e+20	15/222/550	6.99984
Ratio	Large White	PC aa C34:2 / PC aa C36:2	6	H3GA0017731	29078984	A	G	0.16	-0.108176	0.00940703	2.1826e-28	3.25591e+19	15/222/550	8.5736
Ratio	Large White	PC aa C36:4 / PC aa C38:4	6	H3GA0017731	29078984	A	G	0.16	-0.0475877	0.00435157	5.28742e-26	9.44553e+17	15/222/550	7.62761
Ratio	Large White	PC aa C38:4 / PC aa C38:5	6	H3GA0017731	29078984	A	G	0.16	0.00466615	0.000446435	5.01553e-24	2.40927e+17	15/222/550	12.2947
Ratio	Large White	PC aa C36:4 / PC aa C40:5	6	H3GA0017731	29078984	A	G	0.16	-0.583452	0.0504397	1.11285e-28	7.29783e+16	15/222/550	9.869
Ratio	Large White	lysoPC a C16:0 / lysoPC a C18:0	6	H3GA0017731	29078984	A	G	0.16	-0.230533	0.0216751	9.05108e-25	4.33436e+16	15/222/550	5.16227
Ratio	Large White	PC aa C38:5 / PC aa C40:5	6	H3GA0017731	29078984	A	G	0.16	-0.260826	0.0228386	4.76999e-28	1.7026e+16	15/222/550	6.72962
Ratio	Large White	PC aa C36:2 / lysoPC a C16:0	6	H3GA0017731	29078984	A	G	0.16	0.0817872	0.00778666	3.11182e-24	2283655636780000	15/222/550	5.04948
Ratio	Large White	PC aa C38:6 / PC aa C40:6	6	H3GA0017731	29078984	A	G	0.16	-0.130842	0.0141022	1.64935e-19	1975953009480000	15/222/550	4.3956
Ratio	Large White	PC aa C36:1 / PC aa C36:5	6	H3GA0017731	29078984	A	G	0.16	0.00552663	0.000505915	5.91551e-26	2.09309e+14	15/222/550	4.82437
Ratio	Large White	PC aa C34:2 / PC ae C38:2	6	H3GA0017731	29078984	A	G	0.16	-1.45469	0.170593	7.68381e-17	14498525405800	15/222/550	7.76973
Ratio	Large White	PC aa C36:2 / PC aa C36:5	6	H3GA0017731	29078984	A	G	0.16	0.0068896	0.000696429	8.00098e-22	8881816837660	15/222/550	6.80909
Ratio	Large White	PC aa C36:1 / lysoPC a C16:0	6	H3GA0017731	29078984	A	G	0.16	0.191072	0.0180542	1.48028e-24	8.36445e+12	15/222/550	6.19037
Ratio	Large White	PC ae C36:2 / PC ae C38:2	6	H3GA0017731	29078984	A	G	0.16	-0.199896	0.0245499	1.52364e-15	731170396118	15/222/550	6.53834
Ratio	Large White	PC aa C36:1 / PC aa C38:5	6	H3GA0017731	29078984	A	G	0.16	0.0838497	0.00816723	2.7586e-23	448839791503	15/222/550	6.46177
Ratio	Large White	PC aa C34:1 / PC aa C36:1	6	H3GA0017731	29078984	A	G	0.16	-0.333129	0.0324545	2.81222e-23	440282481958	15/222/550	4.87219
Ratio	Large White	PC aa C36:2 / PC aa C36:3	6	H3GA0017731	29078984	A	G	0.16	0.0172928	0.00181292	1.78002e-20	399227592081	15/222/550	7.97868
Ratio	Large White	PC aa C36:4 / PC aa C40:4	6	H3GA0017731	29078984	A	G	0.16	-0.565604	0.0609293	1.58282e-19	315527437037	15/222/550	8.2792
Ratio	Large White	PC aa C36:4 / PC aa C40:2	6	H3GA0017731	29078984	A	G	0.16	-1.16527	0.126643	3.15189e-19	158452105797	15/222/550	5.27252
Ratio	Large White	PC aa C36:4 / PC ae C38:2	6	H3GA0017731	29078984	A	G	0.16	-3.66958	0.399882	3.87392e-19	128919514167	15/222/550	8.48797
Ratio	Large White	PC aa C36:4 / PC ae C40:3	6	H3GA0017731	29078984	A	G	0.16	-1.91944	0.20947	4.33314e-19	1.15257e+11	15/222/550	5.40467
Ratio	Large White	PC aa C36:4 / lysoPC a C18:0	6	H3GA0017731	29078984	A	G	0.16	-0.259016	0.028241	4.04087e-19	9.70848e+10	15/222/550	11.3193
Ratio	Large White	PC aa C38:4 / lysoPC a C16:0	6	H3GA0017731	29078984	A	G	0.16	0.136073	0.0156359	1.89919e-17	6.36259e+10	15/222/550	8.49609
Ratio	Large White	PC aa C34:2 / PC aa C36:1	6	H3GA0017731	29078984	A	G	0.16	-0.302848	0.0302164	2.51016e-22	4.93263e+10	15/222/550	13.1913
Ratio	Large White	PC aa C36:5 / PC aa C38:4	6	H3GA0017731	29078984	A	G	0.16	-0.0520999	0.00603762	3.41827e-17	3.53506e+10	15/222/550	10.9121
Ratio	Large White	PC aa C36:4 / PC aa C42:5	6	H3GA0017731	29078984	A	G	0.16	-3.02777	0.338141	2.45659e-18	2.033e+10	15/222/550	9.85967
Ratio	Large White	PC aa C36:4 / PC ae C38:1	6	H3GA0017731	29078984	A	G	0.16	-0.811765	0.0907473	2.64143e-18	1.89073e+10	15/222/550	5.59743
Ratio	Large White	PC aa C36:4 / PC aa C42:2	6	H3GA0017731	29078984	A	G	0.16	-1.14817	0.129407	4.79307e-18	1.04197e+10	15/222/550	9.10946
Ratio	Large White	PC ae C38:2 / lysoPC a C17:0	6	H3GA0017731	29078984	A	G	0.16	0.112358	0.0148997	1.29345e-13	8.6129e+09	15/222/550	4.33944
Ratio	Large White	PC aa C38:5 / PC aa C40:4	6	H3GA0017731	29078984	A	G	0.16	-0.27086	0.0335996	2.8171e-15	8.31328e+09	15/222/550	8.55251
Ratio	Large White	PC aa C40:5 / lysoPC a C16:0	6	H3GA0017731	29078984	A	G	0.16	0.269912	0.0274255	1.25849e-21	6.45328e+09	15/222/550	9.22921
Ratio	Large White	PC aa C36:5 / PC aa C40:5	6	H3GA0017731	29078984	A	G	0.16	-0.0384797	0.00391922	1.54838e-21	5.2451e+09	15/222/550	5.70285
Ratio	Large White	PC aa C38:5 / PC aa C40:2	6	H3GA0017731	29078984	A	G	0.16	-0.167323	0.0225502	3.05374e-13	4.63665e+09	15/222/550	7.49578
Ratio	Large White	PC aa C34:3 / PC aa C36:2	6	H3GA0017731	29078984	A	G	0.16	-0.00541793	0.000610041	4.46482e-18	1.59163e+09	15/222/550	5.33665
Ratio	Large White	PC aa C36:2 / PC aa C38:5	6	H3GA0017731	29078984	A	G	0.16	0.0253271	0.00285729	5.13852e-18	1.38295e+09	15/222/550	4.35138
Ratio	Large White	PC aa C36:4 / PC aa C42:4	6	H3GA0017731	29078984	A	G	0.16	-7.52366	0.873508	3.88494e-17	1.28554e+09	15/222/550	3.48566
Ratio	Large White	PC aa C38:5 / PC aa C42:5	6	H3GA0017731	29078984	A	G	0.16	-1.29869	0.175335	3.34927e-13	1.24267e+09	15/222/550	7.30128
Ratio	Large White	PC aa C36:4 / PC aa C38:3	6	H3GA0017731	29078984	A	G	0.16	-0.37794	0.0440529	5.08909e-17	9.81363e+08	15/222/550	5.80768
Ratio	Large White	PC aa C34:1 / PC aa C36:4	6	H3GA0017731	29078984	A	G	0.16	0.0689577	0.00806688	6.50737e-17	7.67475e+08	15/222/550	10.2226
Ratio	Large White	PC ae C38:2 / lysoPC a C16:0	6	H3GA0017731	29078984	A	G	0.16	0.215197	0.0279606	4.21595e-14	4.5821e+08	15/222/550	5.71944
Ratio	Large White	PC aa C36:0 / PC aa C36:4	6	H3GA0017731	29078984	A	G	0.16	0.00953246	0.00112692	1.31737e-16	3.79109e+08	15/222/550	7.31708
Ratio	Large White	PC aa C32:1 / PC aa C36:1	6	H3GA0017731	29078984	A	G	0.16	-0.0228282	0.0024115	3.3161e-20	3.73381e+08	15/222/550	4.78332
Ratio	Large White	PC aa C38:5 / PC aa C40:6	6	H3GA0017731	29078984	A	G	0.16	-0.26007	0.0360279	1.24429e-12	2.61919e+08	15/222/550	5.12515
Ratio	Large White	PC aa C38:5 / PC ae C40:3	6	H3GA0017731	29078984	A	G	0.16	-0.404419	0.0583771	8.93138e-12	1.58532e+08	15/222/550	7.6777
Ratio	Large White	PC aa C40:4 / lysoPC a C16:0	6	H3GA0017731	29078984	A	G	0.16	0.216501	0.028774	1.45817e-13	1.3248e+08	15/222/550	5.17992
Ratio	Large White	PC aa C36:5 / PC ae C38:2	6	H3GA0017731	29078984	A	G	0.16	-0.127777	0.0178215	1.73945e-12	1.25954e+08	15/222/550	4.9046
Ratio	Large White	PC aa C36:5 / PC ae C38:1	6	H3GA0017731	29078984	A	G	0.16	-0.123552	0.0172614	1.89006e-12	1.13118e+08	15/222/550	5.90485
Ratio	Large White	PC aa C34:2 / PC ae C38:1	6	H3GA0017731	29078984	A	G	0.16	-0.112025	0.0156776	2.05382e-12	1.04098e+08	15/222/550	5.84239
Ratio	Large White	PC aa C36:4 / PC aa C42:0	6	H3GA0017731	29078984	A	G	0.16	-1.07862	0.130275	5.32285e-16	9.38265e+07	15/222/550	4.77943
Ratio	Large White	PC aa C36:5 / PC aa C38:3	6	H3GA0017731	29078984	A	G	0.16	-0.0597175	0.00839625	2.57494e-12	8.50854e+07	15/222/550	6.03954
Ratio	Large White	PC aa C36:4 / PC aa C38:0	6	H3GA0017731	29078984	A	G	0.16	-2.65144	0.320977	6.16375e-16	8.1026e+07	15/222/550	8.77845
Ratio	Large White	PC aa C36:4 / PC aa C42:6	6	H3GA0017731	29078984	A	G	0.16	-1.36191	0.165285	7.23413e-16	6.90372e+07	15/222/550	6.87837
Ratio	Large White	PC aa C36:4 / PC aa C42:1	6	H3GA0017731	29078984	A	G	0.16	-0.996487	0.121015	7.53761e-16	6.62576e+07	15/222/550	5.63087
Ratio	Large White	PC aa C34:2 / PC aa C38:3	6	H3GA0017731	29078984	A	G	0.16	-0.223424	0.0323353	1.0073e-11	6.09327e+07	15/222/550	9.66598
Ratio	Large White	PC aa C36:2 / PC ae C36:2	6	H3GA0017731	29078984	A	G	0.16	0.0252093	0.00299098	1.67211e-16	4.24992e+07	15/222/550	4.87295
Ratio	Large White	PC aa C36:5 / PC aa C40:2	6	H3GA0017731	29078984	A	G	0.16	-0.0870143	0.0124519	5.96747e-12	3.67141e+07	15/222/550	6.86775
Ratio	Large White	PC aa C38:6 / PC aa C42:5	6	H3GA0017731	29078984	A	G	0.16	-0.203307	0.0295186	1.16696e-11	3.56657e+07	15/222/550	5.56453
Ratio	Large White	PC aa C36:4 / PC aa C40:6	6	H3GA0017731	29078984	A	G	0.16	-0.345659	0.0424453	1.50972e-15	3.30806e+07	15/222/550	7.93225
Ratio	Large White	PC aa C36:4 / SM (OH) C14:1	6	H3GA0017731	29078984	A	G	0.16	-7.39179	0.908813	1.63135e-15	3.06141e+07	15/222/550	7.20303
Ratio	Large White	PC aa C36:5 / PC aa C40:4	6	H3GA0017731	29078984	A	G	0.16	-0.120963	0.0166089	7.96621e-13	2.93983e+07	15/222/550	9.6564
Ratio	Large White	PC aa C38:5 / PC ae C38:2	6	H3GA0017731	29078984	A	G	0.16	-0.195786	0.0292442	4.11652e-11	2.70627e+07	15/222/550	4.59256
Ratio	Large White	PC aa C36:4 / SM C16:0	6	H3GA0017731	29078984	A	G	0.16	-0.108629	0.0134085	2.07895e-15	2.4023e+07	15/222/550	8.61445
Ratio	Large White	PC aa C36:3 / PC ae C38:2	6	H3GA0017731	29078984	A	G	0.16	-0.221338	0.0332779	5.45609e-11	2.04183e+07	15/222/550	7.09519
Ratio	Large White	lysoPC a C17:0 / lysoPC a C18:0	6	H3GA0017731	29078984	A	G	0.16	-0.0364281	0.00450285	2.26862e-15	1.72927e+07	15/222/550	4.36061
Ratio	Large White	PC aa C36:0 / PC aa C38:5	6	H3GA0017731	29078984	A	G	0.16	0.0086874	0.00129555	3.84044e-11	1.49319e+07	15/222/550	9.71281
Ratio	Large White	PC aa C36:5 / PC ae C40:3	6	H3GA0017731	29078984	A	G	0.16	-0.117734	0.0171807	1.46834e-11	1.4921e+07	15/222/550	14.3856
Ratio	Large White	PC aa C38:3 / lysoPC a C16:0	6	H3GA0017731	29078984	A	G	0.16	0.184605	0.0256167	1.35259e-12	1.42822e+07	15/222/550	13.1667
Ratio	Large White	PC aa C38:5 / PC aa C42:4	6	H3GA0017731	29078984	A	G	0.16	-1.73656	0.264844	9.96887e-11	1.42033e+07	15/222/550	6.92798
Ratio	Large White	PC aa C36:5 / PC ae C40:1	6	H3GA0017731	29078984	A	G	0.16	-0.125719	0.0184039	1.69281e-11	1.29424e+07	15/222/550	7.29388
Ratio	Large White	PC ae C38:1 / lysoPC a C17:0	6	H3GA0017731	29078984	A	G	0.16	0.127995	0.0187482	1.73817e-11	1.23003e+07	15/222/550	11.06
Ratio	Large White	PC aa C34:2 / PC aa C40:4	6	H3GA0017731	29078984	A	G	0.16	-0.260557	0.0364648	2.05535e-12	1.13943e+07	15/222/550	12.5673
Ratio	Large White	PC aa C36:5 / PC aa C42:5	6	H3GA0017731	29078984	A	G	0.16	-0.152202	0.0223505	1.94699e-11	1.12528e+07	15/222/550	4.97252
Ratio	Large White	PC aa C36:4 / PC ae C32:1	6	H3GA0017731	29078984	A	G	0.16	-3.53881	0.443142	4.97839e-15	1.00318e+07	15/222/550	5.32197
Ratio	Large White	PC aa C36:4 / PC ae C42:2	6	H3GA0017731	29078984	A	G	0.16	-0.671853	0.084273	5.50408e-15	9.07372e+06	15/222/550	4.67216
Ratio	Large White	PC ae C38:1 / lysoPC a C16:0	6	H3GA0017731	29078984	A	G	0.16	0.120866	0.0169426	2.22519e-12	8.68145e+06	15/222/550	5.59121
Ratio	Large White	PC aa C38:5 / PC ae C42:2	6	H3GA0017731	29078984	A	G	0.16	-0.377914	0.0584158	1.73306e-10	8.17001e+06	15/222/550	5.68487
Ratio	Large White	PC aa C36:4 / PC ae C40:4	6	H3GA0017731	29078984	A	G	0.16	-6.37453	0.805248	8.3667e-15	5.96919e+06	15/222/550	6.68617
Ratio	Large White	PC aa C38:5 / PC aa C42:6	6	H3GA0017731	29078984	A	G	0.16	-2.07839	0.322593	2.04764e-10	5.24849e+06	15/222/550	7.09488
Ratio	Large White	PC aa C36:5 / PC aa C40:6	6	H3GA0017731	29078984	A	G	0.16	-0.130144	0.01946	4.30926e-11	5.08418e+06	15/222/550	7.67526
Ratio	Large White	PC aa C34:2 / PC aa C36:0	6	H3GA0017731	29078984	A	G	0.16	-0.00380629	0.000582499	1.14974e-10	4.98767e+06	15/222/550	6.62015
Ratio	Large White	PC aa C38:3 / PC aa C38:5	6	H3GA0017731	29078984	A	G	0.16	0.142836	0.0219074	1.25962e-10	4.87268e+06	15/222/550	5.7477
Ratio	Large White	PC ae C40:3 / lysoPC a C16:0	6	H3GA0017731	29078984	A	G	0.16	0.361934	0.0513822	4.09581e-12	4.71651e+06	15/222/550	7.39382
Ratio	Large White	PC aa C38:5 / PC ae C38:1	6	H3GA0017731	29078984	A	G	0.16	-0.275829	0.0412932	4.53831e-11	4.71099e+06	15/222/550	8.0125
Ratio	Large White	PC aa C36:4 / PC ae C42:4	6	H3GA0017731	29078984	A	G	0.16	-0.899618	0.114131	1.0761e-14	4.64106e+06	15/222/550	6.07376
Ratio	Large White	PC aa C38:5 / PC aa C42:0	6	H3GA0017731	29078984	A	G	0.16	-0.447762	0.070281	3.20136e-10	4.42285e+06	15/222/550	8.64379
[truncated: 1,800 more rows]

## Sheet: Table_S10
Table S10. All genetic association signals obtained in the meta-analyses. Results include the study of both single metabolites and metabolite ratios.
GWAS approach1	Metabolite or metabolite ratio	SSC	Position2	Marker	Minor Allele	Major Allele	MAF3	P	p-gain4	Direction of beta5	No. of pigs with different genotypes6
Single	Ile	1	30232849	H3GA0001315	C	G	0.6236	2.079e-07		--	130/347/310
Single	Ile	1	30346083	ALGA0002249	A	G	0.392	9.991e-07		++	163/360/264
Single	Ile	1	30379857	ALGA0002259	A	G	0.3869	3.882e-07		++	156/364/267
Single	Ile	1	30605825	ASGA0002034	A	G	0.6405	2.475e-07		--	137/349/301
Single	Ile	1	30649675	MARC0094181	A	G	0.6211	4.781e-07		--	137/350/300
Single	Ile	1	30667823	H3GA0001331	A	G	0.6379	1.501e-06		--	126/335/326
Single	Ile	1	30709317	ASGA0002040	A	G	0.3789	3.866e-07		++	136/351/300
Single	Arg	1	31528591	H3GA0001359	A	G	0.545	3.47e-07		++	187/381/219
Ratio	Arg / Orn	1	31528591	H3GA0001359	A	G	0.545	6.524e-18	5.31882e+10	++	187/381/219
Single	Orn	1	31548038	INRA0001627	A	G	0.3855	6.479e-07		++	151/368/268
Single	Orn	1	31697534	ASGA0002134	A	G	0.4169	2.189e-06		++	163/370/254
Single	Orn	1	31740851	DIAS0004542	A	C	0.5683	2.515e-08		--	192/385/210
Ratio	Arg / Orn	1	31740851	DIAS0004542	A	C	0.5683	3.292e-16	7.63973e+07	++	192/385/210
Single	Orn	1	31868855	DIAS0002497	A	G	0.3496	7.712e-13		++	109/361/317
Ratio	Arg / Orn	1	31868855	DIAS0002497	A	G	0.3496	4.788e-30	1.61069e+17	--	109/361/317
Single	Orn	1	31884853	INRA0001633	A	G	0.7178	3.294e-10		--	74/348/365
Ratio	Arg / Orn	1	31884853	INRA0001633	A	G	0.7178	2.518e-21	130818109611	++	74/348/365
Single	Orn	1	31969926	H3GA0001369	A	G	0.3426	2.64e-11		++	120/380/287
Ratio	Arg / Orn	1	31969926	H3GA0001369	A	G	0.3426	7.591e-29	3.4778e+17	--	120/380/287
Single	Orn	1	32066172	ASGA0002142	A	G	0.6102	3.951e-07		++	82/347/358
Ratio	Arg / Orn	1	32066172	ASGA0002142	A	G	0.6102	1.019e-17	3.87733e+10	--	82/347/358
Ratio	Arg / Orn	1	33839922	ASGA0002260	A	G	0.5269	4.193e-13	4.19509e+08	--	106/392/288
Single	Cit	1	270545489	ASGA0008030	A	G	0.3994	1.613e-10		--	173/368/246
Single	Cit	1	270675522	MARC0099340	A	G	0.4302	9.542e-08		--	93/342/352
Single	Cit	1	270725631	ASGA0008038	A	G	0.4487	2.441e-12		++	199/374/214
Single	PC ae C42:0	2	9548890	MARC0018949	A	G	0.4442	6.083e-07		++	201/368/217
Ratio	PC aa C40:2 / PC ae C42:0	2	9614500	ASGA0008896	A	G	0.4665	2.023e-09	1.37123e+06	--	151/389/247
Ratio	PC aa C40:3 / PC ae C42:0	2	9787054	M1GA0002584	A	G	0.5943	2.818e-11	1.06849e+07	++	104/374/309
Single	PC aa C40:5	2	26333042	MARC0028771	A	G	0.2305	1.941e-06		++	2/86/699
Ratio	PC aa C36:6 / PC ae C40:2	2	43949286	MARC0032926	A	G	0.359	7.874e-10	9.65456e+06	--	173/385/229
Ratio	PC aa C36:6 / PC ae C34:1	2	43949286	MARC0032926	A	G	0.359	2.358e-09	3.09712e+06	--	173/385/229
Ratio	PC aa C36:6 / PC ae C34:0	2	43949286	MARC0032926	A	G	0.359	8.041e-09	945405	--	173/385/229
Ratio	PC aa C36:6 / PC ae C32:1	2	43949286	MARC0032926	A	G	0.359	1.958e-10	3.88253e+07	--	173/385/229
Ratio	PC aa C36:6 / PC ae C30:0	2	43949286	MARC0032926	A	G	0.359	1.04e-09	7.30962e+06	--	173/385/229
Ratio	PC aa C36:3 / PC ae C34:1	2	44147014	MARC0077792	A	G	0.6143	1.998e-08	1.22072e+06	--	121/416/250
Ratio	PC aa C32:0 / PC ae C34:1	2	44147014	MARC0077792	A	G	0.6143	1.867e-09	2.59829e+07	--	121/416/250
Ratio	PC ae C34:1 / PC ae C38:3	2	44471618	ALGA0013592	A	G	0.6157	4.027e-08	2.6819e+06	++	121/412/254
Ratio	PC aa C36:3 / PC ae C34:1	2	44471618	ALGA0013592	A	G	0.6157	4.458e-09	3.23239e+06	--	121/412/254
Ratio	PC aa C32:0 / PC ae C34:1	2	44471618	ALGA0013592	A	G	0.6157	2.548e-10	1.18642e+08	--	121/412/254
Ratio	PC ae C34:1 / PC ae C38:3	2	44552554	ALGA0115399	A	G	0.3821	5.543e-08	1.99531e+06	--	118/414/255
Ratio	PC aa C36:3 / PC ae C34:1	2	44552554	ALGA0115399	A	G	0.3821	9.264e-09	1.78325e+06	++	118/414/255
Ratio	PC aa C32:0 / PC ae C34:1	2	44552554	ALGA0115399	A	G	0.3821	2.991e-10	9.66232e+07	++	118/414/255
Ratio	PC ae C34:1 / PC ae C38:3	2	44638259	ALGA0013598	A	G	0.6179	5.543e-08	1.99531e+06	++	118/414/255
Ratio	PC aa C36:3 / PC ae C34:1	2	44638259	ALGA0013598	A	G	0.6179	9.264e-09	1.78325e+06	--	118/414/255
Ratio	PC aa C32:0 / PC ae C34:1	2	44638259	ALGA0013598	A	G	0.6179	2.991e-10	9.66232e+07	--	118/414/255
Ratio	PC ae C34:1 / PC ae C38:3	2	44758950	ALGA0013605	A	G	0.3266	1.079e-08	7.79703e+06	--	87/363/337
Ratio	PC aa C36:3 / PC ae C34:1	2	44758950	ALGA0013605	A	G	0.3266	9.684e-10	1.08736e+07	++	87/363/337
Ratio	PC aa C34:2 / PC ae C34:1	2	44758950	ALGA0013605	A	G	0.3266	1.435e-08	1.7784e+06	++	87/363/337
Ratio	PC aa C32:0 / PC ae C34:1	2	44758950	ALGA0013605	A	G	0.3266	1.996e-11	1.26904e+09	++	87/363/337
Ratio	PC ae C34:1 / PC ae C38:3	2	45003832	ALGA0013618	A	G	0.4451	5.991e-08	1.40828e+06	--	162/417/207
Ratio	PC aa C32:0 / PC ae C34:1	2	45003832	ALGA0013618	A	G	0.4451	6.959e-10	4.77511e+07	++	162/417/207
Ratio	PC aa C32:0 / PC ae C34:1	2	45073098	ALGA0013636	C	G	0.5255	2.725e-10	5.37615e+07	--	159/417/211
Ratio	PC aa C32:0 / PC ae C34:1	2	45271919	H3GA0006743	A	G	0.5815	8.163e-10	6.11662e+07	++	105/399/283
Ratio	PC aa C32:0 / PC ae C34:1	2	45302406	H3GA0006745	A	G	0.3805	7.375e-09	5.54847e+06	++	86/383/318
Ratio	PC ae C34:1 / PC ae C38:3	2	45437017	ALGA0013646	A	G	0.4401	1.453e-08	1.39367e+06	--	145/413/229
Ratio	PC aa C36:5 / PC ae C34:1	2	45437017	ALGA0013646	A	G	0.4401	2.24e-08	904018	++	145/413/229
Ratio	PC aa C36:3 / PC ae C34:1	2	45437017	ALGA0013646	A	G	0.4401	4.919e-09	4.11669e+06	++	145/413/229
Ratio	PC aa C32:0 / PC ae C34:1	2	45437017	ALGA0013646	A	G	0.4401	7.132e-12	2.83932e+09	++	145/413/229
Ratio	PC aa C32:0 / PC ae C34:1	2	45495353	ALGA0013650	A	G	0.2961	1.148e-11	6.02787e+07	++	103/371/313
Ratio	PC ae C34:1 / PC ae C38:3	2	45628435	MARC0027345	A	G	0.7711	6.905e-12	3.06879e+07	++	58/323/406
Ratio	PC ae C34:1 / PC ae C36:2	2	45628435	MARC0027345	A	G	0.7711	1.45e-10	1.46138e+06	++	58/323/406
Ratio	PC aa C34:3 / PC ae C34:1	2	45628435	MARC0027345	A	G	0.7711	5.75e-11	3.68522e+06	--	58/323/406
Ratio	PC aa C34:2 / PC ae C34:1	2	45628435	MARC0027345	A	G	0.7711	1.823e-11	1.16237e+07	--	58/323/406
Ratio	PC aa C34:1 / PC ae C34:1	2	45628435	MARC0027345	A	G	0.7711	9.288e-14	2.28144e+09	--	58/323/406
Ratio	PC aa C32:2 / PC ae C34:1	2	45628435	MARC0027345	A	G	0.7711	2.195e-11	9.65376e+06	--	58/323/406
Ratio	PC aa C32:1 / PC ae C34:1	2	45628435	MARC0027345	A	G	0.7711	1.101e-11	1.92461e+07	--	58/323/406
Ratio	PC aa C32:0 / PC ae C34:1	2	45628435	MARC0027345	A	G	0.7711	2.612e-15	8.11256e+10	--	58/323/406
Ratio	PC aa C30:0 / PC ae C34:1	2	45628435	MARC0027345	A	G	0.7711	1.423e-12	1.48911e+08	--	58/323/406
Ratio	PC aa C32:0 / PC ae C34:1	2	45943026	H3GA0006754	A	G	0.3821	8.032e-11	2.41409e+08	++	101/390/296
Ratio	PC aa C34:1 / PC ae C34:1	2	45965839	ASGA0097854	A	G	0.2333	2.24e-09	4428125	++	63/322/402
Ratio	PC aa C32:2 / PC ae C34:1	2	45965839	ASGA0097854	A	G	0.2333	1.058e-08	937524	++	63/322/402
Ratio	PC aa C32:0 / PC ae C34:1	2	45965839	ASGA0097854	A	G	0.2333	2.015e-11	4.92258e+08	++	63/322/402
Ratio	PC aa C30:0 / PC ae C34:1	2	45965839	ASGA0097854	A	G	0.2333	5.946e-09	1.66818e+06	++	63/322/402
Ratio	PC aa C32:0 / PC ae C34:1	2	46605610	ASGA0097814	A	G	0.558	7.356e-09	1.54704e+06	++	139/404/244
Ratio	PC aa C34:1 / PC ae C34:1	2	46842659	ALGA0119911	A	C	0.5272	1.042e-08	1.35701e+06	++	155/418/212
Ratio	PC aa C34:1 / PC ae C34:1	2	46844298	MARC0041991	A	G	0.5279	1.449e-08	882678	++	156/417/214
Ratio	PC aa C32:0 / PC ae C34:1	2	47326959	ALGA0013687	A	G	0.4039	8.263e-10	1.39054e+06	++	103/393/291
Ratio	PC aa C34:1 / PC ae C34:1	2	48097311	ALGA0013690	A	G	0.4951	5.405e-08	1.03238e+06	--	93/356/338
Ratio	PC ae C36:1 / PC ae C36:3	2	48557746	ALGA0013702	A	G	0.4635	4.861e-09	1.73771e+06	--	159/392/236
Ratio	SM C16:1 / SM C18:1	2	50750725	ASGA0010510	A	C	0.1855	1.375e-08	2.13527e+06	++	7/126/654
Ratio	SM C16:1 / SM C18:1	2	58920429	H3GA0006890	A	G	0.9097	1.535e-11	2.53811e+08	--	5/138/644
Ratio	SM C16:1 / SM C18:1	2	59024796	H3GA0006888	A	G	0.0741	1.021e-13	1.00392e+10	++	4/105/676
Ratio	SM C16:1 / SM C18:1	2	59069896	ALGA0013961	A	G	0.9095	1.524e-11	2.51772e+08	--	5/138/644
Ratio	SM C16:1 / SM C18:1	2	59117451	ALGA0013963	A	G	0.0741	1.084e-13	9.13007e+09	++	4/105/678
Ratio	SM C16:1 / SM C18:1	2	60428931	ASGA0010487	A	C	0.0864	1.945e-10	1.17635e+08	++	4/130/653
Ratio	SM C16:0 / SM C18:1	2	60428931	ASGA0010487	A	C	0.0864	1.564e-08	1.46292e+06	++	4/130/653
Ratio	SM C16:1 / SM C18:1	2	60663362	M1GA0002940	A	G	0.1642	9.587e-11	1.64911e+07	++	7/133/647
Ratio	SM C16:1 / SM C18:1	2	64683710	ASGA0096884	A	G	0.1165	6.176e-13	9.45272e+09	++	9/164/614
Ratio	SM C16:1 / SM C18:1	2	65349052	H3GA0006831	A	G	0.9369	3.196e-10	7.66896e+06	--	2/86/693
Ratio	SM C16:0 / SM C18:1	2	65349052	H3GA0006831	A	G	0.9369	2.069e-11	1.18463e+08	--	2/86/693
Ratio	SM C18:0 / SM C24:0	2	66111292	ASGA0010421	A	G	0.8446	2.695e-12	8.8423e+07	++	7/133/647
Ratio	SM C16:1 / SM C18:1	2	66111292	ASGA0010421	A	G	0.8446	2.138e-14	3.93592e+10	--	7/133/647
Ratio	SM C18:0 / SM C24:0	2	67373064	MARC0013967	A	G	0.1427	9.381e-12	1.50091e+06	--	17/172/598
Ratio	SM C16:1 / SM C18:1	2	67373064	MARC0013967	A	G	0.1427	5.49e-13	9.08015e+08	++	17/172/598
Ratio	SM C18:0 / SM C24:0	2	68534886	DRGA0003006	A	G	0.8339	1.502e-10	1.24834e+06	++	21/198/568
Ratio	SM C16:1 / SM C18:1	2	68534886	DRGA0003006	A	G	0.8339	3.688e-12	1.04962e+09	--	21/198/568
Ratio	SM C18:0 / SM C24:0	2	70010936	ASGA0010401	A	G	0.7848	7.381e-10	3.5903e+06	++	21/203/563
Ratio	SM C16:1 / SM C18:1	2	70010936	ASGA0010401	A	G	0.7848	3.189e-12	4.7413e+09	--	21/203/563
Ratio	SM (OH) C22:1 / SM C18:0	2	70010936	ASGA0010401	A	G	0.7848	2.385e-09	1.11111e+06	--	21/203/563
Single	PC aa C32:3	2	145517996	ASGA0012664	A	G	0.2061	1.882e-06		--	5/84/698
Single	SM C20:2	4	14576462	SIRI0000276	A	G	0.6196	2.067e-07		++	125/396/266
Single	SM C20:2	4	14601654	ASGA0018536	A	G	0.6128	4.19e-07		++	128/398/261
Ratio	PC aa C36:1 / PC aa C36:4	4	122058519	ALGA0029016	A	G	0.7553	8.887e-09	1.98492e+06	--	18/134/635
Ratio	PC aa C36:1 / PC aa C36:4	4	122418721	DRGA0005309	A	G	0.2008	8.933e-09	2.35419e+06	++	20/148/615
Single	ADMA	4	130375500	M1GA0006938	A	G	0.69	8.725e-08		--	29/266/492
Single	Kynurenine	5	66885632	H3GA0016622	A	G	0.5868	2.239e-06		--	198/372/201
Single	Ac-Orn	6	7944029	H3GA0017521	A	G	0.3419	6.591e-08		--	30/251/506
Ratio	PC aa C38:4 / PC aa C38:5	6	27231744	ALGA0114328	A	G	0.7738	3.731e-14	4.31252e+10	--	2/75/710
Ratio	PC aa C36:2 / PC aa C36:4	6	27231744	ALGA0114328	A	G	0.7738	1.417e-11	6.50388e+06	--	2/75/710
Ratio	PC aa C38:6 / PC aa C40:5	6	27409149	MARC0086608	A	G	0.1224	1.763e-12	4.04765e+07	--	8/84/695
Ratio	PC aa C38:4 / PC aa C38:6	6	27409149	MARC0086608	A	G	0.1224	8.571e-12	1.4199e+07	++	8/84/695
Ratio	PC aa C38:4 / PC aa C38:5	6	27409149	MARC0086608	A	G	0.1224	2.751e-13	7.44093e+08	++	8/84/695
Ratio	PC aa C36:4 / PC aa C40:5	6	27409149	MARC0086608	A	G	0.1224	7.515e-15	1.08357e+09	--	8/84/695
Ratio	PC aa C36:4 / PC aa C38:4	6	27409149	MARC0086608	A	G	0.1224	1.048e-12	7.77004e+06	--	8/84/695
Ratio	PC aa C36:2 / PC aa C38:6	6	27409149	MARC0086608	A	G	0.1224	8.128e-11	1.49729e+06	++	8/84/695
Ratio	PC aa C36:2 / PC aa C38:5	6	27409149	MARC0086608	A	G	0.1224	6.369e-11	3.21401e+06	++	8/84/695
Ratio	PC aa C36:2 / PC aa C36:4	6	27409149	MARC0086608	A	G	0.1224	2.539e-14	3.20717e+08	++	8/84/695
Ratio	PC aa C36:2 / PC aa C36:3	6	27409149	MARC0086608	A	G	0.1224	1.216e-11	3.09128e+08	++	8/84/695
Ratio	PC aa C36:1 / PC aa C36:4	6	27409149	MARC0086608	A	G	0.1224	2.559e-12	3.1821e+06	++	8/84/695
Ratio	PC aa C34:2 / PC aa C36:2	6	27409149	MARC0086608	A	G	0.1224	5.243e-12	7.16956e+08	--	8/84/695
Ratio	PC aa C34:1 / PC aa C40:5	6	27409149	MARC0086608	A	G	0.1224	5.34e-11	1.33633e+06	--	8/84/695
Ratio	PC aa C34:1 / PC aa C36:2	6	27409149	MARC0086608	A	G	0.1224	2.488e-12	1.51085e+09	--	8/84/695
Ratio	PC aa C34:1 / PC aa C36:1	6	27409149	MARC0086608	A	G	0.1224	1.331e-14	285048835462	--	8/84/695
Ratio	lysoPC a C18:0 / lysoPC a C18:1	6	27409149	MARC0086608	A	G	0.1224	1.531e-10	2.47616e+06	++	8/84/695
Ratio	lysoPC a C16:1 / lysoPC a C18:0	6	27409149	MARC0086608	A	G	0.1224	1.616e-10	2.34592e+06	--	8/84/695
Ratio	lysoPC a C16:0 / lysoPC a C18:0	6	27409149	MARC0086608	A	G	0.1224	2.206e-16	1718495013600	--	8/84/695
Ratio	PC aa C38:4 / PC aa C38:5	6	27626041	MARC0091858	A	G	0.9	3.045e-15	144499178982	--	2/83/702
Ratio	PC aa C36:2 / PC aa C38:5	6	27626041	MARC0091858	A	G	0.9	3.574e-11	2.33436e+06	--	2/83/702
Ratio	PC aa C36:2 / PC aa C36:4	6	27626041	MARC0091858	A	G	0.9	5.399e-13	1.54529e+08	--	2/83/702
Ratio	PC aa C34:2 / PC aa C36:2	6	27626041	MARC0091858	A	G	0.9	1.092e-13	7.64011e+08	++	2/83/702
Ratio	PC aa C34:1 / PC aa C36:1	6	27626041	MARC0091858	A	G	0.9	4.403e-14	1.91846e+08	++	2/83/702
Ratio	lysoPC a C16:0 / lysoPC a C18:0	6	27626041	MARC0091858	A	G	0.9	9.72e-16	1.32407e+11	++	2/83/702
Ratio	PC aa C38:4 / PC aa C38:5	6	27632273	MARC0032894	A	C	0.9	3.045e-15	144499178982	--	2/83/702
Ratio	PC aa C36:2 / PC aa C38:5	6	27632273	MARC0032894	A	C	0.9	3.574e-11	2.33436e+06	--	2/83/702
Ratio	PC aa C36:2 / PC aa C36:4	6	27632273	MARC0032894	A	C	0.9	5.399e-13	1.54529e+08	--	2/83/702
Ratio	PC aa C34:2 / PC aa C36:2	6	27632273	MARC0032894	A	C	0.9	1.092e-13	7.64011e+08	++	2/83/702
Ratio	PC aa C34:1 / PC aa C36:1	6	27632273	MARC0032894	A	C	0.9	4.403e-14	1.91846e+08	++	2/83/702
Ratio	lysoPC a C16:0 / lysoPC a C18:0	6	27632273	MARC0032894	A	C	0.9	9.72e-16	1.32407e+11	++	2/83/702
Ratio	PC aa C34:2 / PC ae C38:2	6	27899607	MARC0055666	A	G	0.8358	2.887e-09	4.70038e+06	++	2/99/686
Ratio	PC aa C34:2 / PC aa C36:2	6	27899607	MARC0055666	A	G	0.8358	3.187e-13	1.39316e+09	++	2/99/686
Ratio	lysoPC a C16:0 / lysoPC a C18:0	6	27899607	MARC0055666	A	G	0.8358	1.378e-14	2.82438e+09	++	2/99/686
Ratio	PC aa C36:2 / PC aa C36:5	6	28623557	ALGA0117587	A	C	0.6494	1.26e-10	3.83651e+06	--	64/278/413
Single	PC aa C36:1	6	28950815	ALGA0034984	A	G	0.1228	5.289e-10		++	2/75/710
Single	lysoPC a C18:0	6	28950815	ALGA0034984	A	G	0.1228	8.521e-10		++	2/75/710
Single	PC aa C36:2	6	28950815	ALGA0034984	A	G	0.1228	1.135e-08		++	2/75/710
Single	PC aa C38:4	6	28950815	ALGA0034984	A	G	0.1228	1.997e-06		++	2/75/710
Ratio	PC aa C38:6 / PC ae C42:3	6	28950815	ALGA0034984	A	G	0.1228	5.111e-10	2.95637e+07	--	2/75/710
Ratio	PC aa C38:6 / PC ae C40:1	6	28950815	ALGA0034984	A	G	0.1228	8.576e-09	1.76189e+06	--	2/75/710
Ratio	PC aa C38:5 / PC ae C42:2	6	28950815	ALGA0034984	A	G	0.1228	2.312e-11	3.46886e+06	--	2/75/710
Ratio	PC aa C38:5 / PC ae C38:2	6	28950815	ALGA0034984	A	G	0.1228	1.007e-14	7.96425e+09	--	2/75/710
Ratio	PC aa C38:5 / PC aa C42:2	6	28950815	ALGA0034984	A	G	0.1228	7.316e-11	1.09623e+06	--	2/75/710
Ratio	PC aa C38:4 / PC aa C38:6	6	28950815	ALGA0034984	A	G	0.1228	1.712e-12	1.16647e+06	++	2/75/710
Ratio	PC aa C38:4 / PC aa C38:5	6	28950815	ALGA0034984	A	G	0.1228	1.082e-25	1.84566e+19	++	2/75/710
Ratio	PC aa C38:3 / PC aa C38:5	6	28950815	ALGA0034984	A	G	0.1228	4.884e-11	1.6421e+06	++	2/75/710
Ratio	PC aa C36:4 / PC ae C38:2	6	28950815	ALGA0034984	A	G	0.1228	2.272e-17	1.28081e+11	--	2/75/710
Ratio	PC aa C36:4 / PC ae C36:2	6	28950815	ALGA0034984	A	G	0.1228	5.715e-13	5.09186e+06	--	2/75/710
Ratio	PC aa C36:4 / PC aa C38:3	6	28950815	ALGA0034984	A	G	0.1228	5.95e-13	4.89076e+06	--	2/75/710
Ratio	PC aa C36:2 / PC aa C38:5	6	28950815	ALGA0034984	A	G	0.1228	1.016e-21	11171259842500	++	2/75/710
Ratio	PC aa C36:2 / PC aa C36:4	6	28950815	ALGA0034984	A	G	0.1228	1.856e-21	6115301724140	++	2/75/710
Ratio	PC aa C36:2 / PC aa C36:3	6	28950815	ALGA0034984	A	G	0.1228	1.661e-18	6.83323e+09	++	2/75/710
Ratio	PC aa C36:1 / PC aa C38:5	6	28950815	ALGA0034984	A	G	0.1228	1.859e-21	284507799892	++	2/75/710
Ratio	PC aa C36:1 / PC aa C36:4	6	28950815	ALGA0034984	A	G	0.1228	2.801e-21	188825419493	++	2/75/710
Ratio	PC aa C34:2 / PC aa C36:2	6	28950815	ALGA0034984	A	G	0.1228	3.709e-19	3.06012e+10	--	2/75/710
Ratio	PC aa C34:1 / PC aa C36:2	6	28950815	ALGA0034984	A	G	0.1228	3.373e-17	3.36496e+08	--	2/75/710
Ratio	PC aa C34:1 / PC aa C36:1	6	28950815	ALGA0034984	A	G	0.1228	6.433e-22	822166951656	--	2/75/710
Ratio	PC aa C32:0 / PC aa C36:2	6	28950815	ALGA0034984	A	G	0.1228	2.265e-15	5.01104e+06	--	2/75/710
Ratio	lysoPC a C16:1 / lysoPC a C18:0	6	28950815	ALGA0034984	A	G	0.1228	4.464e-16	1.90883e+06	--	2/75/710
Ratio	lysoPC a C16:0 / lysoPC a C18:0	6	28950815	ALGA0034984	A	G	0.1228	1.269e-22	6714736012610	--	2/75/710
Single	PC aa C36:1	6	28964755	ALGA0034982	A	C	0.1382	5.452e-14		++	4/104/679
Single	lysoPC a C18:0	6	28964755	ALGA0034982	A	C	0.1382	6.655e-13		++	4/104/679
Single	PC aa C36:2	6	28964755	ALGA0034982	A	C	0.1382	4.896e-12		++	4/104/679
Single	PC aa C38:4	6	28964755	ALGA0034982	A	C	0.1382	6.893e-08		++	4/104/679
Ratio	PC ae C38:2 / PC ae C38:3	6	28964755	ALGA0034982	A	C	0.1382	3.675e-12	1.26095e+07	++	4/104/679
Ratio	PC ae C36:2 / PC ae C38:2	6	28964755	ALGA0034982	A	C	0.1382	1.595e-16	290532915361	--	4/104/679
Ratio	PC aa C40:5 / PC ae C40:5	6	28964755	ALGA0034982	A	C	0.1382	2.985e-23	8.76382e+08	++	4/104/679
Ratio	PC aa C38:6 / PC ae C42:3	6	28964755	ALGA0034982	A	C	0.1382	5.276e-17	1433093252460	--	4/104/679
Ratio	PC aa C38:6 / PC ae C42:2	6	28964755	ALGA0034982	A	C	0.1382	2.738e-11	2.7615e+06	--	4/104/679
Ratio	PC aa C38:6 / PC ae C40:1	6	28964755	ALGA0034982	A	C	0.1382	3.67e-16	206021798365	--	4/104/679
Ratio	PC aa C38:6 / PC ae C38:2	6	28964755	ALGA0034982	A	C	0.1382	5.588e-13	8.29277e+07	--	4/104/679
Ratio	PC aa C38:6 / PC ae C38:1	6	28964755	ALGA0034982	A	C	0.1382	8.411e-12	8.98942e+06	--	4/104/679
Ratio	PC aa C38:6 / PC ae C38:0	6	28964755	ALGA0034982	A	C	0.1382	1.07e-13	7.06636e+08	--	4/104/679
Ratio	PC aa C38:5 / PC ae C42:3	6	28964755	ALGA0034982	A	C	0.1382	9.121e-16	4.94244e+07	--	4/104/679
Ratio	PC aa C38:5 / PC ae C42:2	6	28964755	ALGA0034982	A	C	0.1382	2.562e-17	1.75956e+09	--	4/104/679
Ratio	PC aa C38:5 / PC ae C40:2	6	28964755	ALGA0034982	A	C	0.1382	1.202e-17	3.75042e+09	--	4/104/679
Ratio	PC aa C38:5 / PC ae C40:1	6	28964755	ALGA0034982	A	C	0.1382	3.424e-16	1.31659e+08	--	4/104/679
Ratio	PC aa C38:5 / PC ae C38:2	6	28964755	ALGA0034982	A	C	0.1382	7.408e-23	608531317495000	--	4/104/679
Ratio	PC aa C38:5 / PC ae C38:0	6	28964755	ALGA0034982	A	C	0.1382	3.606e-15	1.25014e+07	--	4/104/679
Ratio	PC aa C38:5 / PC ae C36:5	6	28964755	ALGA0034982	A	C	0.1382	1.215e-17	3.71029e+09	--	4/104/679
Ratio	PC aa C38:5 / PC ae C36:3	6	28964755	ALGA0034982	A	C	0.1382	1.105e-15	4.07964e+07	--	4/104/679
Ratio	PC aa C38:5 / PC ae C34:3	6	28964755	ALGA0034982	A	C	0.1382	1.297e-14	3.47571e+06	--	4/104/679
Ratio	PC aa C38:5 / PC ae C34:2	6	28964755	ALGA0034982	A	C	0.1382	3.407e-14	1.32316e+06	--	4/104/679
Ratio	PC aa C38:5 / PC ae C32:1	6	28964755	ALGA0034982	A	C	0.1382	7.105e-17	6.34483e+08	--	4/104/679
Ratio	PC aa C38:5 / PC aa C42:2	6	28964755	ALGA0034982	A	C	0.1382	3.442e-16	1.3097e+08	--	4/104/679
Ratio	PC aa C38:4 / PC aa C38:6	6	28964755	ALGA0034982	A	C	0.1382	1.694e-22	406906729634000	++	4/104/679
Ratio	PC aa C38:4 / PC aa C38:5	6	28964755	ALGA0034982	A	C	0.1382	6.033e-42	7.47224e+33	++	4/104/679
Ratio	PC aa C38:3 / PC aa C38:6	6	28964755	ALGA0034982	A	C	0.1382	3.179e-11	1.85593e+06	++	4/104/679
Ratio	PC aa C38:3 / PC aa C38:5	6	28964755	ALGA0034982	A	C	0.1382	9.08e-19	4.96476e+10	++	4/104/679
Ratio	PC aa C36:5 / PC aa C38:3	6	28964755	ALGA0034982	A	C	0.1382	3.194e-13	1.84721e+08	--	4/104/679
Ratio	PC aa C36:4 / PC ae C40:1	6	28964755	ALGA0034982	A	C	0.1382	1.7e-19	3.62176e+07	--	4/104/679
Ratio	PC aa C36:4 / PC ae C38:2	6	28964755	ALGA0034982	A	C	0.1382	1.83e-30	3.36448e+18	--	4/104/679
Ratio	PC aa C36:4 / PC ae C36:2	6	28964755	ALGA0034982	A	C	0.1382	1.012e-21	6.08399e+09	--	4/104/679
Ratio	PC aa C36:4 / PC ae C36:1	6	28964755	ALGA0034982	A	C	0.1382	8.795e-21	7.00057e+08	--	4/104/679
Ratio	PC aa C36:4 / PC aa C38:3	6	28964755	ALGA0034982	A	C	0.1382	1.88e-23	327500000000	--	4/104/679
Ratio	PC aa C36:3 / PC aa C38:3	6	28964755	ALGA0034982	A	C	0.1382	1.586e-12	3.72005e+07	--	4/104/679
Ratio	PC aa C36:2 / PC ae C36:2	6	28964755	ALGA0034982	A	C	0.1382	1.158e-18	4.22798e+06	++	4/104/679
Ratio	PC aa C36:2 / PC ae C34:1	6	28964755	ALGA0034982	A	C	0.1382	2.285e-18	2.14267e+06	++	4/104/679
Ratio	PC aa C36:2 / PC aa C38:6	6	28964755	ALGA0034982	A	C	0.1382	6.506e-22	7.52536e+09	++	4/104/679
Ratio	PC aa C36:2 / PC aa C38:5	6	28964755	ALGA0034982	A	C	0.1382	1.503e-36	3.25749e+24	++	4/104/679
Ratio	PC aa C36:2 / PC aa C36:4	6	28964755	ALGA0034982	A	C	0.1382	7.665e-39	6.38748e+26	++	4/104/679
Ratio	PC aa C36:2 / PC aa C36:3	6	28964755	ALGA0034982	A	C	0.1382	1.434e-33	3.41423e+21	++	4/104/679
Ratio	PC aa C36:1 / PC aa C38:6	6	28964755	ALGA0034982	A	C	0.1382	2.005e-22	2.7192e+08	++	4/104/679
Ratio	PC aa C36:1 / PC aa C38:5	6	28964755	ALGA0034982	A	C	0.1382	5.273e-36	1.03395e+22	++	4/104/679
Ratio	PC aa C36:1 / PC aa C36:4	6	28964755	ALGA0034982	A	C	0.1382	2.493e-37	2.18692e+23	++	4/104/679
Ratio	PC aa C34:4 / PC ae C38:2	6	28964755	ALGA0034982	A	C	0.1382	4.002e-12	1.15792e+07	--	4/104/679
Ratio	PC aa C34:4 / PC aa C36:2	6	28964755	ALGA0034982	A	C	0.1382	4.973e-22	9.84516e+09	--	4/104/679
Ratio	PC aa C34:3 / PC aa C36:2	6	28964755	ALGA0034982	A	C	0.1382	1.711e-26	286148451198000	--	4/104/679
Ratio	PC aa C34:2 / PC aa C38:3	6	28964755	ALGA0034982	A	C	0.1382	2.597e-13	2.27185e+08	--	4/104/679
Ratio	PC aa C34:2 / PC aa C36:2	6	28964755	ALGA0034982	A	C	0.1382	1.671e-34	2.92998e+22	--	4/104/679
Ratio	PC aa C34:1 / PC ae C38:2	6	28964755	ALGA0034982	A	C	0.1382	4.672e-13	9.91866e+07	--	4/104/679
Ratio	PC aa C34:1 / PC aa C38:3	6	28964755	ALGA0034982	A	C	0.1382	7.113e-13	8.29467e+07	--	4/104/679
Ratio	PC aa C34:1 / PC aa C36:2	6	28964755	ALGA0034982	A	C	0.1382	9.06e-28	5403973509930000	--	4/104/679
Ratio	PC aa C34:1 / PC aa C36:1	6	28964755	ALGA0034982	A	C	0.1382	4.818e-35	1.13159e+21	--	4/104/679
Ratio	PC aa C32:2 / PC ae C38:2	6	28964755	ALGA0034982	A	C	0.1382	5.699e-13	8.13125e+07	--	4/104/679
Ratio	PC aa C32:2 / PC aa C36:2	6	28964755	ALGA0034982	A	C	0.1382	2.503e-21	1.95605e+09	--	4/104/679
Ratio	PC aa C32:0 / PC aa C36:2	6	28964755	ALGA0034982	A	C	0.1382	7.43e-22	6.5895e+09	--	4/104/679
Ratio	lysoPC a C16:1 / lysoPC a C18:0	6	28964755	ALGA0034982	A	C	0.1382	2.233e-23	29802955665	--	4/104/679
Ratio	lysoPC a C16:0 / lysoPC a C18:0	6	28964755	ALGA0034982	A	C	0.1382	2.793e-37	2.38274e+24	--	4/104/679
Ratio	PC aa C38:5 / PC ae C42:2	6	28970880	MARC0019292	A	G	0.601	2.959e-09	3.80534e+06	++	24/268/495
Ratio	PC aa C38:5 / PC ae C40:1	6	28970880	MARC0019292	A	G	0.601	1.1e-08	1.02364e+06	++	24/268/495
Ratio	PC aa C36:5 / PC ae C42:2	6	28970880	MARC0019292	A	G	0.601	3.368e-09	880344	++	24/268/495
Ratio	PC aa C36:5 / PC ae C40:1	6	28970880	MARC0019292	A	G	0.601	2.138e-10	1.38681e+07	++	24/268/495
Ratio	PC aa C36:5 / PC ae C38:1	6	28970880	MARC0019292	A	G	0.601	1.43e-09	1.07622e+06	++	24/268/495
Ratio	PC aa C36:4 / PC ae C42:2	6	28970880	MARC0019292	A	G	0.601	1.622e-10	1.02713e+06	++	24/268/495
Ratio	PC aa C36:4 / PC ae C40:1	6	28970880	MARC0019292	A	G	0.601	6.736e-11	2.47328e+06	++	24/268/495
Ratio	PC aa C36:4 / PC ae C38:1	6	28970880	MARC0019292	A	G	0.601	8.875e-12	1.87718e+07	++	24/268/495
Ratio	PC aa C36:4 / PC aa C40:4	6	28970880	MARC0019292	A	G	0.601	1.385e-10	1.20289e+06	++	24/268/495
Single	PC aa C36:1	6	29340241	DIAS0000297	A	C	0.3008	6.89e-10		++	37/246/504
Single	PC aa C36:2	6	29340241	DIAS0000297	A	C	0.3008	1.818e-08		++	37/246/504
Single	lysoPC a C18:0	6	29340241	DIAS0000297	A	C	0.3008	6.878e-08		++	37/246/504
Ratio	PC aa C38:3 / PC aa C38:5	6	29340241	DIAS0000297	A	C	0.3008	5.132e-11	982463	++	37/246/504
Ratio	PC aa C36:4 / PC aa C38:3	6	29340241	DIAS0000297	A	C	0.3008	2.644e-14	1.90696e+09	--	37/246/504
Ratio	PC aa C36:2 / PC aa C38:5	6	29340241	DIAS0000297	A	C	0.3008	5.862e-16	3.10133e+07	++	37/246/504
Ratio	PC aa C36:1 / PC aa C38:5	6	29340241	DIAS0000297	A	C	0.3008	2.173e-20	3.17073e+10	++	37/246/504
Ratio	PC aa C34:2 / PC ae C38:2	6	29340241	DIAS0000297	A	C	0.3008	4.532e-10	1.9188e+06	--	37/246/504
Ratio	PC aa C34:2 / PC aa C36:2	6	29340241	DIAS0000297	A	C	0.3008	1.668e-19	1.08993e+11	--	37/246/504
Ratio	lysoPC a C16:1 / lysoPC a C18:0	6	29340241	DIAS0000297	A	C	0.3008	2.739e-14	2.51114e+06	--	37/246/504
Ratio	lysoPC a C16:0 / lysoPC a C18:0	6	29340241	DIAS0000297	A	C	0.3008	2.932e-20	2345839017740	--	37/246/504
Single	PC aa C36:1	6	29486603	ALGA0034995	A	G	0.1389	1.92e-15		++	4/106/677
Single	lysoPC a C18:0	6	29486603	ALGA0034995	A	G	0.1389	1.679e-14		++	4/106/677
Single	PC aa C36:2	6	29486603	ALGA0034995	A	G	0.1389	3.384e-13		++	4/106/677
Single	PC aa C38:4	6	29486603	ALGA0034995	A	G	0.1389	8.701e-09		++	4/106/677
Ratio	PC ae C40:4 / PC ae C40:5	6	29486603	ALGA0034995	A	G	0.1389	1.512e-08	1.22751e+06	++	4/106/677
Ratio	PC ae C38:2 / PC ae C38:3	6	29486603	ALGA0034995	A	G	0.1389	2.306e-13	2.03686e+08	++	4/106/677
Ratio	PC ae C36:2 / PC ae C38:2	6	29486603	ALGA0034995	A	G	0.1389	2.354e-19	199532710280000	--	4/106/677
Ratio	PC aa C40:5 / PC ae C40:5	6	29486603	ALGA0034995	A	G	0.1389	2.774e-28	377793799567	++	4/106/677
Ratio	PC aa C38:6 / PC ae C42:3	6	29486603	ALGA0034995	A	G	0.1389	8.969e-19	11829635410900	--	4/106/677
Ratio	PC aa C38:6 / PC ae C42:2	6	29486603	ALGA0034995	A	G	0.1389	1.193e-12	8.89355e+06	--	4/106/677
Ratio	PC aa C38:6 / PC ae C40:3	6	29486603	ALGA0034995	A	G	0.1389	1.055e-11	1.00569e+06	--	4/106/677
Ratio	PC aa C38:6 / PC ae C40:1	6	29486603	ALGA0034995	A	G	0.1389	1.121e-19	94647636039300	--	4/106/677
Ratio	PC aa C38:6 / PC ae C38:2	6	29486603	ALGA0034995	A	G	0.1389	2.1e-14	5.05238e+08	--	4/106/677
Ratio	PC aa C38:6 / PC ae C38:1	6	29486603	ALGA0034995	A	G	0.1389	2.593e-13	4.09179e+07	--	4/106/677
Ratio	PC aa C38:6 / PC ae C38:0	6	29486603	ALGA0034995	A	G	0.1389	1.9e-15	5.58421e+09	--	4/106/677
Ratio	PC aa C38:5 / PC ae C42:3	6	29486603	ALGA0034995	A	G	0.1389	1.705e-17	5.02522e+07	--	4/106/677
Ratio	PC aa C38:5 / PC ae C42:2	6	29486603	ALGA0034995	A	G	0.1389	7.994e-20	1.0718e+10	--	4/106/677
Ratio	PC aa C38:5 / PC ae C40:2	6	29486603	ALGA0034995	A	G	0.1389	6.97e-20	1.22927e+10	--	4/106/677
Ratio	PC aa C38:5 / PC ae C40:1	6	29486603	ALGA0034995	A	G	0.1389	8.299e-20	10324135438	--	4/106/677
Ratio	PC aa C38:5 / PC ae C38:2	6	29486603	ALGA0034995	A	G	0.1389	4.763e-26	1.79887e+16	--	4/106/677
Ratio	PC aa C38:5 / PC ae C38:0	6	29486603	ALGA0034995	A	G	0.1389	1.906e-17	4.49528e+07	--	4/106/677
Ratio	PC aa C38:5 / PC ae C36:5	6	29486603	ALGA0034995	A	G	0.1389	2.764e-19	3.09986e+09	--	4/106/677
Ratio	PC aa C38:5 / PC ae C36:3	6	29486603	ALGA0034995	A	G	0.1389	6.814e-18	1.25741e+08	--	4/106/677
Ratio	PC aa C38:5 / PC ae C34:3	6	29486603	ALGA0034995	A	G	0.1389	2.451e-17	3.49572e+07	--	4/106/677
Ratio	PC aa C38:5 / PC ae C34:2	6	29486603	ALGA0034995	A	G	0.1389	2.888e-16	2.96676e+06	--	4/106/677
Ratio	PC aa C38:5 / PC ae C32:1	6	29486603	ALGA0034995	A	G	0.1389	5.937e-18	1.44315e+08	--	4/106/677
Ratio	PC aa C38:5 / PC aa C42:2	6	29486603	ALGA0034995	A	G	0.1389	3.785e-18	2.26367e+08	--	4/106/677
Ratio	PC aa C38:4 / PC aa C38:6	6	29486603	ALGA0034995	A	G	0.1389	1.9e-26	4.57947e+17	++	4/106/677
Ratio	PC aa C38:4 / PC aa C38:5	6	29486603	ALGA0034995	A	G	0.1389	5.39e-50	1.58961e+40	++	4/106/677
Ratio	PC aa C38:3 / PC aa C38:6	6	29486603	ALGA0034995	A	G	0.1389	1.161e-13	6.27304e+07	++	4/106/677
Ratio	PC aa C38:3 / PC aa C38:5	6	29486603	ALGA0034995	A	G	0.1389	4.377e-23	19575051405100	++	4/106/677
Ratio	PC aa C36:5 / PC aa C38:3	6	29486603	ALGA0034995	A	G	0.1389	2.764e-16	2.63495e+10	--	4/106/677
Ratio	PC aa C36:4 / PC ae C40:1	6	29486603	ALGA0034995	A	G	0.1389	3.083e-24	1.67791e+09	--	4/106/677
Ratio	PC aa C36:4 / PC ae C38:2	6	29486603	ALGA0034995	A	G	0.1389	5.163e-36	1.00194e+21	--	4/106/677
Ratio	PC aa C36:4 / PC ae C36:2	6	29486603	ALGA0034995	A	G	0.1389	4.143e-25	1.24861e+10	--	4/106/677
Ratio	PC aa C36:4 / PC ae C36:1	6	29486603	ALGA0034995	A	G	0.1389	3.023e-24	1.71121e+09	--	4/106/677
Ratio	PC aa C36:4 / PC aa C38:3	6	29486603	ALGA0034995	A	G	0.1389	7.333e-30	705441156416000	--	4/106/677
Ratio	PC aa C36:3 / PC aa C38:3	6	29486603	ALGA0034995	A	G	0.1389	2.087e-16	3.4897e+10	--	4/106/677
Ratio	PC aa C36:2 / PC ae C36:2	6	29486603	ALGA0034995	A	G	0.1389	7.865e-23	4.30261e+09	++	4/106/677
Ratio	PC aa C36:2 / PC ae C34:1	6	29486603	ALGA0034995	A	G	0.1389	2.828e-22	1.19661e+09	++	4/106/677
Ratio	PC aa C36:2 / PC aa C38:6	6	29486603	ALGA0034995	A	G	0.1389	2.373e-25	1426042983570	++	4/106/677
Ratio	PC aa C36:2 / PC aa C38:5	6	29486603	ALGA0034995	A	G	0.1389	1.645e-42	2.05714e+29	++	4/106/677
Ratio	PC aa C36:2 / PC aa C36:4	6	29486603	ALGA0034995	A	G	0.1389	5.346e-47	9.67639e+31	++	4/106/677
Ratio	PC aa C36:2 / PC aa C36:3	6	29486603	ALGA0034995	A	G	0.1389	1.777e-42	1.90433e+29	++	4/106/677
Ratio	PC aa C36:1 / PC ae C34:1	6	29486603	ALGA0034995	A	G	0.1389	1.275e-23	1.50588e+08	++	4/106/677
Ratio	PC aa C36:1 / PC aa C38:6	6	29486603	ALGA0034995	A	G	0.1389	1.7e-26	112941176471	++	4/106/677
Ratio	PC aa C36:1 / PC aa C38:5	6	29486603	ALGA0034995	A	G	0.1389	2.031e-43	9.45347e+27	++	4/106/677
Ratio	PC aa C36:1 / PC aa C36:4	6	29486603	ALGA0034995	A	G	0.1389	6.851e-47	2.80251e+31	++	4/106/677
Ratio	PC aa C34:4 / PC ae C38:2	6	29486603	ALGA0034995	A	G	0.1389	8.258e-13	5.68782e+07	--	4/106/677
Ratio	PC aa C34:4 / PC aa C36:4	6	29486603	ALGA0034995	A	G	0.1389	1.819e-21	2.84387e+06	++	4/106/677
Ratio	PC aa C34:4 / PC aa C36:2	6	29486603	ALGA0034995	A	G	0.1389	1.225e-24	276244897959	--	4/106/677
Ratio	PC aa C34:3 / PC aa C36:2	6	29486603	ALGA0034995	A	G	0.1389	8.937e-32	3.78651e+18	--	4/106/677
Ratio	PC aa C34:2 / PC aa C38:3	6	29486603	ALGA0034995	A	G	0.1389	4.473e-17	162821372681	--	4/106/677
Ratio	PC aa C34:2 / PC aa C36:2	6	29486603	ALGA0034995	A	G	0.1389	5.758e-43	5.87704e+29	--	4/106/677
Ratio	PC aa C34:1 / PC ae C38:2	6	29486603	ALGA0034995	A	G	0.1389	1.259e-14	3.73074e+09	--	4/106/677
Ratio	PC aa C34:1 / PC aa C38:3	6	29486603	ALGA0034995	A	G	0.1389	3.855e-16	1.88923e+10	--	4/106/677
Ratio	PC aa C34:1 / PC aa C36:2	6	29486603	ALGA0034995	A	G	0.1389	1.404e-32	2.41026e+19	--	4/106/677
Ratio	PC aa C34:1 / PC aa C36:1	6	29486603	ALGA0034995	A	G	0.1389	2.659e-42	7.22076e+26	--	4/106/677
Ratio	PC aa C32:3 / PC aa C38:5	6	29486603	ALGA0034995	A	G	0.1389	7.358e-16	1.16445e+06	++	4/106/677
Ratio	PC aa C32:2 / PC ae C38:2	6	29486603	ALGA0034995	A	G	0.1389	9.036e-13	5.1981e+07	--	4/106/677
Ratio	PC aa C32:2 / PC aa C36:2	6	29486603	ALGA0034995	A	G	0.1389	4.166e-23	8.1229e+09	--	4/106/677
Ratio	PC aa C32:0 / PC ae C38:2	6	29486603	ALGA0034995	A	G	0.1389	2.226e-12	2.11006e+07	--	4/106/677
Ratio	PC aa C32:0 / PC aa C36:2	6	29486603	ALGA0034995	A	G	0.1389	2.857e-26	11844592229600	--	4/106/677
Ratio	PC aa C32:0 / PC aa C36:1	6	29486603	ALGA0034995	A	G	0.1389	6.322e-23	3.03701e+07	--	4/106/677
Ratio	lysoPC a C16:1 / lysoPC a C18:0	6	29486603	ALGA0034995	A	G	0.1389	8.422e-29	199358822133000	--	4/106/677
Ratio	lysoPC a C16:0 / lysoPC a C18:0	6	29486603	ALGA0034995	A	G	0.1389	5.239e-47	3.20481e+32	--	4/106/677
Single	PC aa C36:1	6	29935029	ASGA0027932	A	G	0.1279	1.987e-10		++	3/84/700
Single	lysoPC a C18:0	6	29935029	ASGA0027932	A	G	0.1279	1.64e-09		++	3/84/700
Single	PC aa C36:2	6	29935029	ASGA0027932	A	G	0.1279	6.027e-09		++	3/84/700
Ratio	PC ae C38:2 / PC ae C38:3	6	29935029	ASGA0027932	A	G	0.1279	1.046e-10	2.76291e+06	++	3/84/700
Ratio	PC ae C36:2 / PC ae C38:2	6	29935029	ASGA0027932	A	G	0.1279	2.168e-14	1.33303e+10	--	3/84/700
Ratio	PC aa C40:5 / PC ae C40:5	6	29935029	ASGA0027932	A	G	0.1279	1.353e-17	5.19808e+06	++	3/84/700
Ratio	PC aa C38:6 / PC ae C42:3	6	29935029	ASGA0027932	A	G	0.1279	2.385e-14	5.0608e+09	--	3/84/700
Ratio	PC aa C38:6 / PC ae C40:1	6	29935029	ASGA0027932	A	G	0.1279	1.424e-13	8.47612e+08	--	3/84/700
Ratio	PC aa C38:6 / PC ae C38:2	6	29935029	ASGA0027932	A	G	0.1279	1.303e-11	9.26324e+06	--	3/84/700
Ratio	PC aa C38:6 / PC ae C38:1	6	29935029	ASGA0027932	A	G	0.1279	9.242e-11	1.30599e+06	--	3/84/700
Ratio	PC aa C38:6 / PC ae C38:0	6	29935029	ASGA0027932	A	G	0.1279	1.895e-12	6.36939e+07	--	3/84/700
Ratio	PC aa C38:5 / PC ae C42:2	6	29935029	ASGA0027932	A	G	0.1279	9.498e-15	2.0299e+07	--	3/84/700
Ratio	PC aa C38:5 / PC ae C40:2	6	29935029	ASGA0027932	A	G	0.1279	1.385e-14	1.39206e+07	--	3/84/700
Ratio	PC aa C38:5 / PC ae C38:2	6	29935029	ASGA0027932	A	G	0.1279	8.5e-19	226823529412	--	3/84/700
Ratio	PC aa C38:5 / PC ae C36:5	6	29935029	ASGA0027932	A	G	0.1279	9.379e-14	2.05566e+06	--	3/84/700
Ratio	PC aa C38:5 / PC ae C32:1	6	29935029	ASGA0027932	A	G	0.1279	3.981e-14	4.843e+06	--	3/84/700
Ratio	PC aa C38:4 / PC aa C38:6	6	29935029	ASGA0027932	A	G	0.1279	6.103e-19	8220547271830	++	3/84/700
Ratio	PC aa C38:4 / PC aa C38:5	6	29935029	ASGA0027932	A	G	0.1279	3.462e-33	5.56904e+25	++	3/84/700
Ratio	PC aa C38:3 / PC aa C38:5	6	29935029	ASGA0027932	A	G	0.1279	1.559e-15	1.23669e+08	++	3/84/700
Ratio	PC aa C36:5 / PC aa C38:3	6	29935029	ASGA0027932	A	G	0.1279	5.591e-11	7.04525e+06	--	3/84/700
Ratio	PC aa C36:4 / PC ae C38:2	6	29935029	ASGA0027932	A	G	0.1279	5.94e-25	135740740741000	--	3/84/700
Ratio	PC aa C36:4 / PC ae C36:2	6	29935029	ASGA0027932	A	G	0.1279	4.185e-18	1.92664e+07	--	3/84/700
Ratio	PC aa C36:4 / PC ae C36:1	6	29935029	ASGA0027932	A	G	0.1279	8.676e-18	9.29345e+06	--	3/84/700
Ratio	PC aa C36:4 / PC aa C38:3	6	29935029	ASGA0027932	A	G	0.1279	3.253e-19	2.47864e+08	--	3/84/700
Ratio	PC aa C36:3 / PC aa C38:3	6	29935029	ASGA0027932	A	G	0.1279	4.956e-11	7.94794e+06	--	3/84/700
Ratio	PC aa C36:2 / PC ae C34:1	6	29935029	ASGA0027932	A	G	0.1279	6.167e-16	9.77299e+06	++	3/84/700
Ratio	PC aa C36:2 / PC aa C38:6	6	29935029	ASGA0027932	A	G	0.1279	5.634e-18	1.06976e+09	++	3/84/700
Ratio	PC aa C36:2 / PC aa C38:5	6	29935029	ASGA0027932	A	G	0.1279	7.281e-29	8.27771e+19	++	3/84/700
Ratio	PC aa C36:2 / PC aa C36:4	6	29935029	ASGA0027932	A	G	0.1279	5.84e-31	1.38065e+20	++	3/84/700
Ratio	PC aa C36:2 / PC aa C36:3	6	29935029	ASGA0027932	A	G	0.1279	3.097e-26	1.94608e+17	++	3/84/700
Ratio	PC aa C36:1 / PC aa C38:6	6	29935029	ASGA0027932	A	G	0.1279	2.559e-17	7.76475e+06	++	3/84/700
Ratio	PC aa C36:1 / PC aa C38:5	6	29935029	ASGA0027932	A	G	0.1279	6.879e-26	2.8885e+15	++	3/84/700
Ratio	PC aa C36:1 / PC aa C36:4	6	29935029	ASGA0027932	A	G	0.1279	3.429e-27	2.35141e+16	++	3/84/700
Ratio	PC aa C34:4 / PC ae C38:2	6	29935029	ASGA0027932	A	G	0.1279	2.307e-10	1.25271e+06	--	3/84/700
Ratio	PC aa C34:4 / PC aa C36:2	6	29935029	ASGA0027932	A	G	0.1279	1.888e-17	3.19227e+08	--	3/84/700
Ratio	PC aa C34:3 / PC aa C36:2	6	29935029	ASGA0027932	A	G	0.1279	1.253e-20	481005586592	--	3/84/700
Ratio	PC aa C34:2 / PC aa C38:3	6	29935029	ASGA0027932	A	G	0.1279	9.461e-12	4.16341e+07	--	3/84/700
Ratio	PC aa C34:2 / PC aa C36:2	6	29935029	ASGA0027932	A	G	0.1279	1.241e-27	4.85657e+18	--	3/84/700
Ratio	PC aa C34:1 / PC ae C38:2	6	29935029	ASGA0027932	A	G	0.1279	7.919e-12	3.64945e+07	--	3/84/700
Ratio	PC aa C34:1 / PC aa C38:3	6	29935029	ASGA0027932	A	G	0.1279	6.601e-12	5.96728e+07	--	3/84/700
Ratio	PC aa C34:1 / PC aa C36:2	6	29935029	ASGA0027932	A	G	0.1279	1.885e-23	319734748011000	--	3/84/700
Ratio	PC aa C34:1 / PC aa C36:1	6	29935029	ASGA0027932	A	G	0.1279	2.423e-27	8.20058e+16	--	3/84/700
Ratio	PC aa C32:2 / PC ae C38:2	6	29935029	ASGA0027932	A	G	0.1279	3.927e-11	7.35931e+06	--	3/84/700
Ratio	PC aa C32:2 / PC aa C36:2	6	29935029	ASGA0027932	A	G	0.1279	8.62e-17	6.99188e+07	--	3/84/700
Ratio	PC aa C32:0 / PC ae C38:2	6	29935029	ASGA0027932	A	G	0.1279	1.22e-10	2.36885e+06	--	3/84/700
Ratio	PC aa C32:0 / PC aa C36:2	6	29935029	ASGA0027932	A	G	0.1279	1.458e-18	4.13374e+09	--	3/84/700
Ratio	lysoPC a C18:0 / lysoPC a C18:1	6	29935029	ASGA0027932	A	G	0.1279	1.372e-15	1.19534e+06	++	3/84/700
Ratio	lysoPC a C16:1 / lysoPC a C18:0	6	29935029	ASGA0027932	A	G	0.1279	1.951e-20	8.40595e+10	--	3/84/700
Ratio	lysoPC a C16:0 / lysoPC a C18:0	6	29935029	ASGA0027932	A	G	0.1279	4.255e-31	3.85429e+21	--	3/84/700
Single	PC aa C36:1	6	29957350	ALGA0035018	A	G	0.1274	2.936e-10		++	3/84/700
Single	lysoPC a C18:0	6	29957350	ALGA0035018	A	G	0.1274	2.054e-09		++	3/84/700
Single	PC aa C36:2	6	29957350	ALGA0035018	A	G	0.1274	6.904e-09		++	3/84/700
Ratio	PC ae C38:2 / PC ae C38:3	6	29957350	ALGA0035018	A	G	0.1274	1.816e-10	1.72687e+06	++	3/84/700
Ratio	PC ae C36:2 / PC ae C38:2	6	29957350	ALGA0035018	A	G	0.1274	3.183e-14	9.85234e+09	--	3/84/700
Ratio	PC aa C40:5 / PC ae C40:5	6	29957350	ALGA0035018	A	G	0.1274	3.073e-17	1.76473e+06	++	3/84/700
Ratio	PC aa C38:6 / PC ae C42:3	6	29957350	ALGA0035018	A	G	0.1274	5.339e-15	2.52482e+10	--	3/84/700
Ratio	PC aa C38:6 / PC ae C40:1	6	29957350	ALGA0035018	A	G	0.1274	7.142e-14	1.88743e+09	--	3/84/700
Ratio	PC aa C38:6 / PC ae C38:2	6	29957350	ALGA0035018	A	G	0.1274	1.643e-11	8.2045e+06	--	3/84/700
Ratio	PC aa C38:6 / PC ae C38:1	6	29957350	ALGA0035018	A	G	0.1274	8.584e-11	1.57036e+06	--	3/84/700
Ratio	PC aa C38:6 / PC ae C38:0	6	29957350	ALGA0035018	A	G	0.1274	2.052e-12	6.5692e+07	--	3/84/700
Ratio	PC aa C38:6 / PC aa C42:4	6	29957350	ALGA0035018	A	G	0.1274	1.359e-10	991906	--	3/84/700
Ratio	PC aa C38:6 / PC aa C40:2	6	29957350	ALGA0035018	A	G	0.1274	2.545e-12	5.29666e+07	--	3/84/700
Ratio	PC aa C38:5 / PC ae C42:3	6	29957350	ALGA0035018	A	G	0.1274	1.522e-13	1.47043e+06	--	3/84/700
Ratio	PC aa C38:5 / PC ae C42:2	6	29957350	ALGA0035018	A	G	0.1274	5.116e-15	4.37451e+07	--	3/84/700
Ratio	PC aa C38:5 / PC ae C40:3	6	29957350	ALGA0035018	A	G	0.1274	4.074e-17	5.49337e+09	--	3/84/700
Ratio	PC aa C38:5 / PC ae C40:2	6	29957350	ALGA0035018	A	G	0.1274	1.911e-14	1.17111e+07	--	3/84/700
Ratio	PC aa C38:5 / PC ae C38:2	6	29957350	ALGA0035018	A	G	0.1274	1.42e-18	157605633803	--	3/84/700
Ratio	PC aa C38:5 / PC ae C32:1	6	29957350	ALGA0035018	A	G	0.1274	2.485e-14	9.00604e+06	--	3/84/700
Ratio	PC aa C38:4 / PC aa C38:6	6	29957350	ALGA0035018	A	G	0.1274	6.844e-19	6611630625370	++	3/84/700
Ratio	PC aa C38:4 / PC aa C38:5	6	29957350	ALGA0035018	A	G	0.1274	4.533e-33	4.93713e+25	++	3/84/700
Ratio	PC aa C38:3 / PC aa C38:5	6	29957350	ALGA0035018	A	G	0.1274	2.45e-15	9.13469e+07	++	3/84/700
Ratio	PC aa C36:5 / PC aa C38:3	6	29957350	ALGA0035018	A	G	0.1274	6.83e-11	6.1347e+06	--	3/84/700
Ratio	PC aa C36:4 / PC ae C42:3	6	29957350	ALGA0035018	A	G	0.1274	3.826e-17	2.37193e+06	--	3/84/700
Ratio	PC aa C36:4 / PC ae C38:2	6	29957350	ALGA0035018	A	G	0.1274	9.706e-25	93498866680400	--	3/84/700
Ratio	PC aa C36:4 / PC ae C36:2	6	29957350	ALGA0035018	A	G	0.1274	4.133e-18	2.19574e+07	--	3/84/700
Ratio	PC aa C36:4 / PC aa C42:2	6	29957350	ALGA0035018	A	G	0.1274	5.197e-18	1.7462e+07	--	3/84/700
Ratio	PC aa C36:4 / PC aa C38:3	6	29957350	ALGA0035018	A	G	0.1274	5.495e-19	1.6515e+08	--	3/84/700
Ratio	PC aa C36:3 / PC aa C38:3	6	29957350	ALGA0035018	A	G	0.1274	6.04e-11	6.93709e+06	--	3/84/700
Ratio	PC aa C36:2 / PC ae C34:1	6	29957350	ALGA0035018	A	G	0.1274	9.22e-16	7.48807e+06	++	3/84/700
Ratio	PC aa C36:2 / PC aa C38:6	6	29957350	ALGA0035018	A	G	0.1274	1.128e-17	6.12057e+08	++	3/84/700
Ratio	PC aa C36:2 / PC aa C38:5	6	29957350	ALGA0035018	A	G	0.1274	1.729e-28	3.99306e+19	++	3/84/700
Ratio	PC aa C36:2 / PC aa C36:4	6	29957350	ALGA0035018	A	G	0.1274	1.796e-30	5.0529e+19	++	3/84/700
Ratio	PC aa C36:2 / PC aa C36:3	6	29957350	ALGA0035018	A	G	0.1274	5.805e-26	1.18932e+17	++	3/84/700
Ratio	PC aa C36:1 / PC aa C38:6	6	29957350	ALGA0035018	A	G	0.1274	8.735e-17	3.36119e+06	++	3/84/700
Ratio	PC aa C36:1 / PC aa C38:5	6	29957350	ALGA0035018	A	G	0.1274	3.684e-25	796959826276000	++	3/84/700
Ratio	PC aa C34:4 / PC ae C38:2	6	29957350	ALGA0035018	A	G	0.1274	3.177e-10	987095	--	3/84/700
Ratio	PC aa C34:4 / PC aa C36:2	6	29957350	ALGA0035018	A	G	0.1274	2.634e-17	2.62111e+08	--	3/84/700
Ratio	PC aa C34:3 / PC aa C36:2	6	29957350	ALGA0035018	A	G	0.1274	1.761e-20	392049971607	--	3/84/700
Ratio	PC aa C34:2 / PC aa C38:3	6	29957350	ALGA0035018	A	G	0.1274	1.128e-11	3.71454e+07	--	3/84/700
Ratio	PC aa C34:2 / PC aa C36:2	6	29957350	ALGA0035018	A	G	0.1274	2.11e-27	3.27204e+18	--	3/84/700
Ratio	PC aa C34:1 / PC ae C38:2	6	29957350	ALGA0035018	A	G	0.1274	7.029e-12	4.46152e+07	--	3/84/700
Ratio	PC aa C34:1 / PC aa C38:3	6	29957350	ALGA0035018	A	G	0.1274	6.096e-12	6.87336e+07	--	3/84/700
Ratio	PC aa C34:1 / PC aa C36:2	6	29957350	ALGA0035018	A	G	0.1274	1.84e-23	375217391304000	--	3/84/700
Ratio	PC aa C34:1 / PC aa C36:1	6	29957350	ALGA0035018	A	G	0.1274	6.466e-27	4.54067e+16	--	3/84/700
Ratio	PC aa C32:2 / PC ae C38:2	6	29957350	ALGA0035018	A	G	0.1274	4.863e-11	6.44869e+06	--	3/84/700
Ratio	PC aa C32:2 / PC aa C36:2	6	29957350	ALGA0035018	A	G	0.1274	1.108e-16	6.23105e+07	--	3/84/700
Ratio	PC aa C32:0 / PC ae C38:2	6	29957350	ALGA0035018	A	G	0.1274	1.095e-10	2.86393e+06	--	3/84/700
Ratio	PC aa C32:0 / PC aa C36:2	6	29957350	ALGA0035018	A	G	0.1274	1.4e-18	4.93143e+09	--	3/84/700
Ratio	lysoPC a C18:0 / lysoPC a C18:1	6	29957350	ALGA0035018	A	G	0.1274	1.021e-15	2.01175e+06	++	3/84/700
Ratio	lysoPC a C16:1 / lysoPC a C18:0	6	29957350	ALGA0035018	A	G	0.1274	2.885e-20	7.11958e+10	--	3/84/700
Ratio	lysoPC a C16:0 / lysoPC a C18:0	6	29957350	ALGA0035018	A	G	0.1274	7.321e-31	2.80563e+21	--	3/84/700
Ratio	PC aa C38:5 / PC ae C38:2	6	29981802	ASGA0027941	A	C	0.8428	5.255e-12	6.18839e+06	++	5/142/640
Ratio	PC aa C38:4 / PC aa C38:6	6	29981802	ASGA0027941	A	C	0.8428	3.308e-12	2.65961e+08	--	5/142/640
Ratio	PC aa C38:4 / PC aa C38:5	6	29981802	ASGA0027941	A	C	0.8428	1.356e-22	2.39823e+17	--	5/142/640
Ratio	PC aa C36:4 / PC ae C38:2	6	29981802	ASGA0027941	A	C	0.8428	4.731e-14	6.60537e+07	++	5/142/640
Ratio	PC aa C36:2 / PC aa C38:5	6	29981802	ASGA0027941	A	C	0.8428	5.295e-17	614164305949	--	5/142/640
Ratio	PC aa C36:2 / PC aa C36:4	6	29981802	ASGA0027941	A	C	0.8428	9.791e-17	3.19171e+10	--	5/142/640
Ratio	PC aa C36:2 / PC aa C36:3	6	29981802	ASGA0027941	A	C	0.8428	6.006e-15	5.80586e+09	--	5/142/640
Ratio	PC aa C36:1 / PC aa C38:5	6	29981802	ASGA0027941	A	C	0.8428	3.072e-12	1.05859e+07	--	5/142/640
Ratio	PC aa C34:2 / PC aa C36:2	6	29981802	ASGA0027941	A	C	0.8428	2.746e-15	1.26985e+10	++	5/142/640
Ratio	PC aa C34:1 / PC aa C36:2	6	29981802	ASGA0027941	A	C	0.8428	3.745e-15	9.31108e+09	++	5/142/640
Ratio	PC aa C34:1 / PC aa C36:1	6	29981802	ASGA0027941	A	C	0.8428	2.907e-14	1.97936e+09	++	5/142/640
Ratio	lysoPC a C16:0 / lysoPC a C18:0	6	29981802	ASGA0027941	A	C	0.8428	3.402e-17	8.57143e+11	++	5/142/640
Ratio	PC aa C38:4 / PC aa C38:5	6	30050012	ALGA0035037	A	G	0.2594	3.242e-11	1.27267e+08	++	43/268/476
Ratio	PC aa C36:2 / PC aa C38:5	6	30050012	ALGA0035037	A	G	0.2594	3.267e-11	1.53321e+07	++	43/268/476
Ratio	PC aa C36:2 / PC aa C36:4	6	30050012	ALGA0035037	A	G	0.2594	2.605e-12	1.92284e+08	++	43/268/476
Ratio	SM (OH) C22:1 / SM C24:0	6	165590160	ALGA0037714	A	G	0.9042	2.086e-08	1.77709e+06	++	8/114/665
Ratio	SM C16:0 / SM C24:0	6	167797522	H3GA0019322	A	G	0.393	4.727e-09	4.6245e+06	++	182/388/217
Ratio	SM (OH) C22:2 / SM C24:0	6	167797522	H3GA0019322	A	G	0.393	4.104e-09	5.32651e+06	++	182/388/217
Ratio	SM (OH) C22:1 / SM C24:0	6	167797522	H3GA0019322	A	G	0.393	8.412e-16	13956252971900	++	182/388/217
Ratio	SM C16:0 / SM C24:0	6	167850197	ASGA0030335	A	G	0.6899	2.502e-09	6.6227e+06	--	114/347/326
Ratio	SM (OH) C22:2 / SM C24:0	6	167850197	ASGA0030335	A	G	0.6899	8.567e-10	1.93417e+07	--	114/347/326
Ratio	SM (OH) C22:1 / SM C24:0	6	167850197	ASGA0030335	A	G	0.6899	1.426e-15	10238429172500	--	114/347/326
Ratio	SM (OH) C22:1 / SM (OH) C24:1	6	167850197	ASGA0030335	A	G	0.6899	1.356e-08	1.0767e+06	--	114/347/326
Ratio	SM (OH) C22:1 / SM C24:0	6	167936003	ASGA0030343	A	G	0.5935	1.756e-11	7.76765e+08	--	80/301/406
Ratio	SM (OH) C22:2 / SM C24:1	6	167989528	ALGA0037812	A	G	0.7721	1.32e-08	1.57955e+06	++	43/262/482
Ratio	SM (OH) C22:1 / SM C24:1	6	167989528	ALGA0037812	A	G	0.7721	3.919e-09	2.03215e+06	++	43/262/482
Ratio	SM (OH) C22:1 / SM C24:0	6	167989528	ALGA0037812	A	G	0.7721	1.888e-10	4.21822e+07	++	43/262/482
Ratio	SM (OH) C22:1 / SM C24:0	6	170312136	MARC0034540	A	G	0.2961	2.194e-12	2.85369e+09	--	24/212/551
Ratio	SM (OH) C22:1 / SM C24:0	6	170319677	ASGA0103354	A	G	0.2917	2.268e-11	4.33422e+08	--	22/206/559
Ratio	SM (OH) C22:1 / SM C24:0	6	170340281	M1GA0009131	A	G	0.2373	5.295e-14	2.54202e+10	--	32/219/536
Single	PC aa C42:5	7	7797364	M1GA0009510	A	G	0.8925	1.388e-06		--	8/141/638
Single	PC aa C40:6	7	7797364	M1GA0009510	A	G	0.8925	2.372e-06		--	8/141/638
Ratio	PC ae C44:5 / PC ae C44:6	7	44984516	ALGA0041370	A	G	0.3073	7.639e-12	4.79382e+08	++	109/320/358
Ratio	PC ae C44:5 / PC ae C44:6	7	45390438	MARC0025919	A	G	0.259	1.137e-14	1.9701e+11	++	79/345/363
Ratio	PC ae C44:5 / PC ae C44:6	7	45698913	ASGA0033546	A	G	0.408	1.025e-11	2.23317e+08	++	194/386/207
Ratio	PC ae C44:5 / PC ae C44:6	7	45828581	ALGA0041464	A	G	0.7067	1.142e-15	7.86778e+10	--	80/352/355
Ratio	PC ae C44:5 / PC ae C44:6	7	45856658	ASGA0033576	A	G	0.2571	6.407e-13	2.44264e+08	++	61/312/414
Ratio	PC ae C44:5 / PC ae C44:6	7	45925391	H3GA0021468	A	G	0.2686	2.15e-17	6437209302330	++	72/327/388
Ratio	PC ae C44:5 / PC ae C44:6	7	45959499	ALGA0041477	A	G	0.249	9.337e-19	62064903073800	++	59/306/422
Single	PC ae C44:6	7	45991916	ASGA0033592	A	C	0.1173	6.149e-09		--	9/172/606
Ratio	PC ae C44:5 / PC ae C44:6	7	45991916	ASGA0033592	A	C	0.1173	2.969e-33	2.07107e+24	++	9/172/606
Ratio	PC ae C42:5 / PC ae C44:6	7	45991916	ASGA0033592	A	C	0.1173	3.194e-15	1.92517e+06	++	9/172/606
Ratio	PC ae C42:4 / PC ae C44:6	7	45991916	ASGA0033592	A	C	0.1173	5.777e-15	1.06439e+06	++	9/172/606
Ratio	PC ae C40:5 / PC ae C44:6	7	45991916	ASGA0033592	A	C	0.1173	2.698e-16	2.2791e+07	++	9/172/606
Ratio	PC ae C38:5 / PC ae C44:6	7	45991916	ASGA0033592	A	C	0.1173	1.017e-17	6.04621e+08	++	9/172/606
Ratio	PC ae C38:5 / PC ae C40:6	7	45991916	ASGA0033592	A	C	0.1173	6.721e-08	1.82711e+06	++	9/172/606
Ratio	PC ae C38:4 / PC ae C44:6	7	45991916	ASGA0033592	A	C	0.1173	5.914e-17	1.03974e+08	++	9/172/606
Ratio	PC ae C44:5 / PC ae C44:6	7	46033165	H3GA0021475	A	G	0.7581	4.101e-20	303340648622000	--	53/297/437
Ratio	PC ae C44:5 / PC ae C44:6	7	46063115	ASGA0033599	A	G	0.7581	4.101e-20	303340648622000	--	53/297/437
Ratio	PC ae C44:5 / PC ae C44:6	7	46081552	ASGA0033603	A	G	0.2543	4.43e-20	176952595937000	++	62/305/420
Single	PC ae C44:6	7	46094909	M1GA0010288	A	C	0.2249	2.416e-06		--	50/288/449
Ratio	PC ae C44:5 / PC ae C44:6	7	46094909	M1GA0010288	A	C	0.2249	2.263e-24	1.06761e+18	++	50/288/449
Ratio	PC aa C42:0 / PC ae C42:2	7	46094909	M1GA0010288	A	C	0.2249	1.47e-08	1.58027e+06	--	50/288/449
Single	PC ae C44:6	7	46108788	ALGA0041496	A	G	0.7693	3.834e-07		++	53/289/445
Ratio	PC ae C44:5 / PC ae C44:6	7	46108788	ALGA0041496	A	G	0.7693	1.596e-24	2.40226e+17	--	53/289/445
Ratio	PC aa C42:0 / PC ae C42:2	7	46108788	ALGA0041496	A	G	0.7693	7.854e-09	2.11485e+06	++	53/289/445
Single	PC ae C44:6	7	46124358	ALGA0041501	A	G	0.2307	3.834e-07		--	53/289/445
Ratio	PC ae C44:5 / PC ae C44:6	7	46124358	ALGA0041501	A	G	0.2307	1.596e-24	2.40226e+17	++	53/289/445
Ratio	PC aa C42:0 / PC ae C42:2	7	46124358	ALGA0041501	A	G	0.2307	7.854e-09	2.11485e+06	--	53/289/445
Single	PC ae C40:1	7	46334668	ASGA0037329	A	G	0.5903	8.295e-07		++	57/310/420
Ratio	PC aa C38:4 / PC ae C40:1	7	46334668	ASGA0037329	A	G	0.5903	5.578e-13	1.48709e+06	--	57/310/420
Single	PC ae C40:1	7	46356250	ASGA0037335	A	G	0.59	9.179e-07		++	57/310/420
Ratio	PC aa C38:4 / PC ae C40:1	7	46356250	ASGA0037335	A	G	0.59	6.622e-13	1.38614e+06	--	57/310/420
Ratio	PC ae C44:5 / PC ae C44:6	7	47295291	ALGA0041511	A	C	0.5502	6.049e-09	2.15573e+06	--	212/353/222
Ratio	PC ae C44:5 / PC ae C44:6	7	47712958	H3GA0021503	A	G	0.2136	9.749e-11	6.71351e+07	++	47/278/462
Ratio	PC ae C44:5 / PC ae C44:6	7	48218972	ASGA0033742	A	G	0.7435	1.809e-12	5.2681e+07	--	30/230/527
Single	PC ae C40:1	7	54698134	ASGA0034199	A	G	0.1942	5.055e-17		--	31/282/474
Single	PC ae C42:2	7	54698134	ASGA0034199	A	G	0.1942	1.692e-11		--	31/282/474
Single	PC ae C38:0	7	54698134	ASGA0034199	A	G	0.1942	1.225e-07		--	31/282/474
Single	PC ae C42:3	7	54698134	ASGA0034199	A	G	0.1942	3.813e-07		--	31/282/474
Ratio	PC ae C40:3 / PC ae C42:2	7	54698134	ASGA0034199	A	G	0.1942	2.877e-18	5.88113e+06	++	31/282/474
Ratio	PC ae C38:6 / PC ae C40:1	7	54698134	ASGA0034199	A	G	0.1942	3.048e-24	1.65846e+07	++	31/282/474
Ratio	PC ae C36:5 / PC ae C40:1	7	54698134	ASGA0034199	A	G	0.1942	4.345e-26	1.16341e+09	++	31/282/474
Ratio	PC aa C42:0 / PC ae C42:2	7	54698134	ASGA0034199	A	G	0.1942	2.024e-19	8.35968e+07	++	31/282/474
Ratio	PC aa C42:0 / PC ae C40:1	7	54698134	ASGA0034199	A	G	0.1942	3.396e-23	1.48852e+06	++	31/282/474
Ratio	PC aa C40:5 / PC ae C42:2	7	54698134	ASGA0034199	A	G	0.1942	5.539e-18	3.0547e+06	++	31/282/474
Ratio	PC aa C40:2 / PC ae C42:2	7	54698134	ASGA0034199	A	G	0.1942	7.521e-24	2249700837650	++	31/282/474
Ratio	PC aa C38:4 / PC ae C42:3	7	54698134	ASGA0034199	A	G	0.1942	1.411e-13	2.70234e+06	++	31/282/474
Ratio	PC aa C38:4 / PC ae C42:2	7	54698134	ASGA0034199	A	G	0.1942	7.541e-31	2.24373e+19	++	31/282/474
Ratio	PC aa C38:4 / PC ae C40:1	7	54698134	ASGA0034199	A	G	0.1942	3.459e-36	1.46141e+19	++	31/282/474
Ratio	PC aa C38:4 / PC ae C38:0	7	54698134	ASGA0034199	A	G	0.1942	5.401e-14	2.2681e+06	++	31/282/474
Ratio	PC aa C38:4 / PC aa C38:6	7	54698134	ASGA0034199	A	G	0.1942	1.654e-12	7.19468e+06	++	31/282/474
Ratio	PC aa C36:2 / PC ae C42:2	7	54698134	ASGA0034199	A	G	0.1942	5.993e-19	2.82329e+07	++	31/282/474
Ratio	PC aa C36:2 / PC ae C40:1	7	54698134	ASGA0034199	A	G	0.1942	2.651e-25	1.90683e+08	++	31/282/474
Ratio	PC aa C36:2 / PC aa C36:3	7	54698134	ASGA0034199	A	G	0.1942	3.254e-11	1.37216e+08	++	31/282/474
Ratio	PC aa C36:1 / PC ae C40:1	7	54698134	ASGA0034199	A	G	0.1942	7.089e-24	7.13077e+06	++	31/282/474
Ratio	PC aa C32:3 / PC ae C42:3	7	54698134	ASGA0034199	A	G	0.1942	1.32e-14	2.88864e+07	++	31/282/474
Ratio	PC aa C32:3 / PC ae C42:2	7	54698134	ASGA0034199	A	G	0.1942	2.443e-22	6.92591e+10	++	31/282/474
Ratio	PC aa C32:3 / PC ae C40:1	7	54698134	ASGA0034199	A	G	0.1942	8.764e-28	5.76791e+10	++	31/282/474
Single	PC ae C40:1	7	54887670	DBNP0000793	A	G	0.8058	5.055e-17		++	31/282/474
Single	PC ae C42:2	7	54887670	DBNP0000793	A	G	0.8058	1.692e-11		++	31/282/474
Single	PC ae C38:0	7	54887670	DBNP0000793	A	G	0.8058	1.225e-07		++	31/282/474
Single	PC ae C42:3	7	54887670	DBNP0000793	A	G	0.8058	3.813e-07		++	31/282/474
Ratio	PC ae C40:3 / PC ae C42:2	7	54887670	DBNP0000793	A	G	0.8058	2.877e-18	5.88113e+06	--	31/282/474
Ratio	PC ae C38:6 / PC ae C40:1	7	54887670	DBNP0000793	A	G	0.8058	3.048e-24	1.65846e+07	--	31/282/474
Ratio	PC ae C36:5 / PC ae C40:1	7	54887670	DBNP0000793	A	G	0.8058	4.345e-26	1.16341e+09	--	31/282/474
Ratio	PC aa C42:0 / PC ae C42:2	7	54887670	DBNP0000793	A	G	0.8058	2.024e-19	8.35968e+07	--	31/282/474
Ratio	PC aa C42:0 / PC ae C40:1	7	54887670	DBNP0000793	A	G	0.8058	3.396e-23	1.48852e+06	--	31/282/474
Ratio	PC aa C40:5 / PC ae C42:2	7	54887670	DBNP0000793	A	G	0.8058	5.539e-18	3.0547e+06	--	31/282/474
Ratio	PC aa C40:2 / PC ae C42:2	7	54887670	DBNP0000793	A	G	0.8058	7.521e-24	2249700837650	--	31/282/474
Ratio	PC aa C38:4 / PC ae C42:3	7	54887670	DBNP0000793	A	G	0.8058	1.411e-13	2.70234e+06	--	31/282/474
Ratio	PC aa C38:4 / PC ae C42:2	7	54887670	DBNP0000793	A	G	0.8058	7.541e-31	2.24373e+19	--	31/282/474
Ratio	PC aa C38:4 / PC ae C40:1	7	54887670	DBNP0000793	A	G	0.8058	3.459e-36	1.46141e+19	--	31/282/474
Ratio	PC aa C38:4 / PC ae C38:0	7	54887670	DBNP0000793	A	G	0.8058	5.401e-14	2.2681e+06	--	31/282/474
Ratio	PC aa C38:4 / PC aa C38:6	7	54887670	DBNP0000793	A	G	0.8058	1.654e-12	7.19468e+06	--	31/282/474
Ratio	PC aa C36:2 / PC ae C42:2	7	54887670	DBNP0000793	A	G	0.8058	5.993e-19	2.82329e+07	--	31/282/474
Ratio	PC aa C36:2 / PC ae C40:1	7	54887670	DBNP0000793	A	G	0.8058	2.651e-25	1.90683e+08	--	31/282/474
Ratio	PC aa C36:2 / PC aa C36:3	7	54887670	DBNP0000793	A	G	0.8058	3.254e-11	1.37216e+08	--	31/282/474
Ratio	PC aa C36:1 / PC ae C40:1	7	54887670	DBNP0000793	A	G	0.8058	7.089e-24	7.13077e+06	--	31/282/474
Ratio	PC aa C32:3 / PC ae C42:3	7	54887670	DBNP0000793	A	G	0.8058	1.32e-14	2.88864e+07	--	31/282/474
Ratio	PC aa C32:3 / PC ae C42:2	7	54887670	DBNP0000793	A	G	0.8058	2.443e-22	6.92591e+10	--	31/282/474
Ratio	PC aa C32:3 / PC ae C40:1	7	54887670	DBNP0000793	A	G	0.8058	8.764e-28	5.76791e+10	--	31/282/474
Single	PC ae C40:1	7	54919473	ASGA0034201	A	G	0.8082	3.309e-17		++	31/282/473
Single	PC ae C42:2	7	54919473	ASGA0034201	A	G	0.8082	6.274e-12		++	31/282/473
Single	PC ae C42:3	7	54919473	ASGA0034201	A	G	0.8082	9.28e-08		++	31/282/473
Single	PC ae C38:0	7	54919473	ASGA0034201	A	G	0.8082	1.374e-07		++	31/282/473
Ratio	PC ae C40:3 / PC ae C42:2	7	54919473	ASGA0034201	A	G	0.8082	2.938e-18	2.13547e+06	--	31/282/473
Ratio	PC ae C38:6 / PC ae C40:1	7	54919473	ASGA0034201	A	G	0.8082	1.034e-23	3.20019e+06	--	31/282/473
Ratio	PC ae C36:5 / PC ae C40:1	7	54919473	ASGA0034201	A	G	0.8082	1.025e-25	3.22829e+08	--	31/282/473
Ratio	PC aa C42:0 / PC ae C42:2	7	54919473	ASGA0034201	A	G	0.8082	1.343e-18	4.67163e+06	--	31/282/473
Ratio	PC aa C40:5 / PC ae C42:2	7	54919473	ASGA0034201	A	G	0.8082	7.819e-19	8.02404e+06	--	31/282/473
Ratio	PC aa C40:2 / PC ae C42:2	7	54919473	ASGA0034201	A	G	0.8082	2.545e-24	2465225933200	--	31/282/473
Ratio	PC aa C38:4 / PC ae C42:3	7	54919473	ASGA0034201	A	G	0.8082	1.41e-14	6.58156e+06	--	31/282/473
Ratio	PC aa C38:4 / PC ae C42:2	7	54919473	ASGA0034201	A	G	0.8082	8.064e-32	7.78026e+19	--	31/282/473
Ratio	PC aa C38:4 / PC ae C40:1	7	54919473	ASGA0034201	A	G	0.8082	1.033e-36	3.20329e+19	--	31/282/473
Ratio	PC aa C38:4 / PC ae C38:0	7	54919473	ASGA0034201	A	G	0.8082	6.504e-14	2.11255e+06	--	31/282/473
Ratio	PC aa C38:4 / PC aa C38:6	7	54919473	ASGA0034201	A	G	0.8082	3.134e-12	5.02553e+06	--	31/282/473
Ratio	PC aa C36:2 / PC ae C42:2	7	54919473	ASGA0034201	A	G	0.8082	3.251e-19	1.92987e+07	--	31/282/473
Ratio	PC aa C36:2 / PC ae C40:1	7	54919473	ASGA0034201	A	G	0.8082	3.924e-25	8.43272e+07	--	31/282/473
Ratio	PC aa C36:2 / PC aa C36:3	7	54919473	ASGA0034201	A	G	0.8082	1.875e-11	164960000	--	31/282/473
Ratio	PC aa C36:1 / PC ae C40:1	7	54919473	ASGA0034201	A	G	0.8082	7.966e-24	4.1539e+06	--	31/282/473
Ratio	PC aa C32:3 / PC ae C42:3	7	54919473	ASGA0034201	A	G	0.8082	2.642e-14	3.51249e+06	--	31/282/473
Ratio	PC aa C32:3 / PC ae C42:2	7	54919473	ASGA0034201	A	G	0.8082	3.253e-21	1.92868e+09	--	31/282/473
Ratio	PC aa C32:3 / PC ae C40:1	7	54919473	ASGA0034201	A	G	0.8082	4.932e-26	6.70925e+08	--	31/282/473
Single	PC ae C40:1	7	54987917	INRA0026086	A	G	0.2634	1.125e-15		--	69/350/368
Single	PC ae C42:2	7	54987917	INRA0026086	A	G	0.2634	1.838e-10		--	69/350/368
Single	PC ae C38:0	7	54987917	INRA0026086	A	G	0.2634	1.271e-07		--	69/350/368
Single	PC ae C42:3	7	54987917	INRA0026086	A	G	0.2634	1.324e-07		--	69/350/368
Single	PC aa C38:6	7	54987917	INRA0026086	A	G	0.2634	1.043e-06		--	69/350/368
Ratio	PC aa C42:0 / PC ae C42:2	7	54987917	INRA0026086	A	G	0.2634	5.065e-17	3.62883e+06	++	69/350/368
Ratio	PC aa C40:2 / PC ae C42:2	7	54987917	INRA0026086	A	G	0.2634	2.97e-17	6.18855e+06	++	69/350/368
Ratio	PC aa C38:4 / PC ae C42:2	7	54987917	INRA0026086	A	G	0.2634	2.602e-20	7.0638e+09	++	69/350/368
Ratio	PC aa C38:4 / PC ae C40:1	7	54987917	INRA0026086	A	G	0.2634	1.071e-25	1.05042e+10	++	69/350/368
Ratio	PC aa C32:3 / PC ae C42:2	7	54987917	INRA0026086	A	G	0.2634	6.68e-17	2.7515e+06	++	69/350/368
Ratio	PC aa C32:3 / PC ae C40:1	7	54987917	INRA0026086	A	G	0.2634	1.183e-21	950972	++	69/350/368
Single	PC ae C40:1	7	55245189	ASGA0034205	A	G	0.6777	2.784e-09		++	108/397/281
Single	PC ae C42:2	7	55245189	ASGA0034205	A	G	0.6777	1.206e-06		++	108/397/281
Ratio	PC aa C40:2 / PC ae C42:2	7	55245189	ASGA0034205	A	G	0.6777	4.453e-13	2.70829e+06	--	108/397/281
Ratio	PC aa C38:4 / PC ae C42:2	7	55245189	ASGA0034205	A	G	0.6777	3.356e-13	3.59356e+06	--	108/397/281
Ratio	PC aa C38:4 / PC ae C40:1	7	55245189	ASGA0034205	A	G	0.6777	3.354e-16	8.30054e+06	--	108/397/281
Single	PC ae C40:1	7	55617577	ALGA0042218	A	G	0.7903	2.584e-09		++	6/136/645
Single	PC ae C42:2	7	55617577	ALGA0042218	A	G	0.7903	2.27e-08		++	6/136/645
Ratio	PC ae C34:2 / PC ae C38:6	7	88277167	ALGA0043136	A	G	0.316	8.164e-09	2.32607e+06	++	40/304/443
Ratio	PC ae C34:2 / PC ae C36:5	7	88277167	ALGA0043136	A	G	0.316	1.391e-09	5.23077e+06	++	40/304/443
Ratio	PC ae C34:2 / PC ae C38:6	7	88346942	MARC0023503	A	C	0.683	1.153e-08	1.74241e+06	--	40/304/443
Ratio	PC ae C34:2 / PC ae C36:5	7	88346942	MARC0023503	A	C	0.683	2.063e-09	4.14833e+06	--	40/304/443
Single	C8	7	93137554	ALGA0043766	A	G	0.4592	1.779e-07		++	187/382/218
Single	Kynurenine	10	11301419	ALGA0057132	A	C	0.8485	1.637e-08		++	4/110/673
Single	Kynurenine	10	11407563	DRGA0010298	A	G	0.3919	1.184e-06		--	143/397/247
Single	Kynurenine	10	11608411	ALGA0057146	A	G	0.2226	2.384e-06		++	56/292/439
Single	Kynurenine	10	11645525	MARC0050928	A	C	0.8761	4.982e-17		++	2/138/647
Single	Kynurenine	10	11720309	H3GA0053792	A	G	0.1667	6.403e-14		--	2/145/640
Single	Kynurenine	10	11834912	ALGA0110509	A	C	0.7114	1.774e-06		--	96/360/331
Single	Kynurenine	10	11963387	MARC0049529	A	G	0.4017	6.807e-07		--	135/376/276
Single	Kynurenine	10	12107244	H3GA0029301	A	G	0.2047	1.131e-15		--	4/130/653
Single	Kynurenine	10	12183539	ASGA0046584	A	G	0.6399	1.808e-10		--	160/364/263
Single	Kynurenine	10	12204694	ASGA0046593	A	G	0.3601	1.808e-10		++	160/364/263
Single	Kynurenine	10	12232435	ASGA0046599	A	G	0.687	5.532e-18		++	10/169/608
Single	Kynurenine	10	12260482	ALGA0124445	A	G	0.7238	4.361e-26		++	3/124/660
Single	Kynurenine	10	12439245	MARC0068908	A	G	0.1183	7.321e-08		++	18/149/620
Single	Kynurenine	10	12447567	MARC0101304	A	G	0.6956	7.881e-37		++	11/169/607
Single	Kynurenine	10	12495364	ALGA0117764	A	G	0.6761	2.606e-35		++	11/172/600
Single	Kynurenine	10	12564565	MARC0014251	A	G	0.6482	1.325e-25		++	23/209/555
Single	Kynurenine	10	12711084	ALGA0057279	A	G	0.7198	1.822e-16		++	12/190/585
Single	Kynurenine	10	12773847	M1GA0013794	A	G	0.3169	1.274e-13		--	21/250/516
Single	Kynurenine	10	12813075	ALGA0057264	A	G	0.6826	8.428e-14		++	21/250/516
Single	Kynurenine	10	12956974	ALGA0057243	A	G	0.2929	5.261e-24		--	20/201/566
Single	Kynurenine	10	13092434	ALGA0057208	C	G	0.5892	1.006e-11		++	83/326/378
Single	Kynurenine	10	13127146	ASGA0046606	A	G	0.2915	5.54e-24		--	20/198/569
Single	Kynurenine	10	13227282	MARC0047249	A	G	0.4108	1.006e-11		--	83/326/378
Single	Kynurenine	10	13694095	H3GA0029341	A	G	0.1644	1.407e-08		--	5/106/676
Single	Kynurenine	10	13771460	M1GA0013802	A	G	0.8334	1.29e-09		++	5/110/672
Single	Kynurenine	10	13785361	ALGA0057315	A	G	0.5071	7.709e-11		--	117/359/311
Single	Kynurenine	10	13797536	H3GA0029351	A	G	0.5817	7.548e-12		++	73/327/387
Single	Kynurenine	10	13815402	ASGA0046696	A	G	0.4183	7.548e-12		--	73/327/387
Single	Kynurenine	10	13985130	MARC0063547	A	C	0.4093	1.469e-10		--	64/327/387
Single	Kynurenine	10	14319384	MARC0049579	A	C	0.7071	1.279e-13		++	13/183/591
Single	Kynurenine	10	14328664	MARC0028567	A	G	0.5839	1.596e-10		++	73/327/387
Single	Kynurenine	10	14525650	ALGA0057340	A	G	0.4185	4.858e-09		--	71/327/389
Single	Kynurenine	10	14603796	H3GA0029376	A	G	0.4854	4.391e-07		++	141/394/252
Single	Kynurenine	10	14711601	ALGA0057371	A	G	0.2534	5.289e-08		--	4/107/676
Single	Kynurenine	10	14794268	MARC0114836	A	G	0.7434	2.164e-09		++	4/115/668
Single	Kynurenine	10	14988867	ALGA0057391	A	G	0.5762	3.927e-10		++	74/334/379
Single	Kynurenine	10	16533878	ASGA0046812	A	G	0.6724	1.737e-11		++	22/234/530
Single	Kynurenine	10	16549180	ALGA0057450	A	G	0.6727	2.1e-11		++	22/235/530
Single	PC ae C40:6	12	6284901	H3GA0033064	A	C	0.2093	2.578e-11		++	40/318/429
Single	PC ae C44:6	12	6284901	H3GA0033064	A	C	0.2093	5.143e-10		++	40/318/429
Single	PC ae C42:5	12	6284901	H3GA0033064	A	C	0.2093	5.293e-10		++	40/318/429
Single	PC ae C38:5	12	6284901	H3GA0033064	A	C	0.2093	2.924e-09		++	40/318/429
Single	PC ae C36:4	12	6284901	H3GA0033064	A	C	0.2093	1.144e-08		++	40/318/429
Single	PC ae C42:4	12	6284901	H3GA0033064	A	C	0.2093	5.318e-08		++	40/318/429
Single	PC ae C44:5	12	6284901	H3GA0033064	A	C	0.2093	5.704e-08		++	40/318/429
Single	PC ae C38:6	12	6284901	H3GA0033064	A	C	0.2093	1.876e-06		++	40/318/429
Single	PC ae C38:4	12	6284901	H3GA0033064	A	C	0.2093	2.118e-06		++	40/318/429
Ratio	PC ae C40:2 / PC ae C42:4	12	6284901	H3GA0033064	A	C	0.2093	3.348e-14	1.58841e+06	--	40/318/429
Ratio	PC ae C38:6 / SM C16:0	12	6284901	H3GA0033064	A	C	0.2093	7.735e-13	2.42534e+06	++	40/318/429
Ratio	PC ae C38:5 / SM C16:0	12	6284901	H3GA0033064	A	C	0.2093	3.363e-16	8.69462e+06	++	40/318/429
Ratio	PC ae C38:0 / PC ae C40:6	12	6284901	H3GA0033064	A	C	0.2093	1.475e-18	1.7478e+07	--	40/318/429
Ratio	PC ae C36:5 / PC ae C40:6	12	6284901	H3GA0033064	A	C	0.2093	3.978e-18	6.48064e+06	--	40/318/429
Ratio	PC ae C36:5 / PC ae C38:6	12	6284901	H3GA0033064	A	C	0.2093	5.219e-20	35945583445100	--	40/318/429
Ratio	PC ae C36:5 / PC ae C38:5	12	6284901	H3GA0033064	A	C	0.2093	2.397e-18	1.21986e+09	--	40/318/429
Ratio	PC ae C36:4 / SM C16:0	12	6284901	H3GA0033064	A	C	0.2093	2.453e-16	4.66368e+07	++	40/318/429
Ratio	PC ae C36:4 / PC ae C36:5	12	6284901	H3GA0033064	A	C	0.2093	9.392e-18	1.21806e+09	++	40/318/429
Ratio	PC ae C36:3 / PC ae C36:4	12	6284901	H3GA0033064	A	C	0.2093	1.905e-17	6.00525e+08	--	40/318/429
Ratio	PC ae C34:3 / PC ae C38:6	12	6284901	H3GA0033064	A	C	0.2093	2.124e-14	8.83239e+07	--	40/318/429
Ratio	PC ae C34:3 / PC ae C38:5	12	6284901	H3GA0033064	A	C	0.2093	3.092e-15	945666	--	40/318/429
Ratio	PC ae C34:3 / PC ae C36:4	12	6284901	H3GA0033064	A	C	0.2093	3.243e-21	3527597903180	--	40/318/429
Ratio	PC ae C34:2 / PC ae C36:4	12	6284901	H3GA0033064	A	C	0.2093	1.699e-15	6.73337e+06	--	40/318/429
Ratio	PC ae C34:1 / PC ae C36:4	12	6284901	H3GA0033064	A	C	0.2093	6.586e-15	1.73702e+06	--	40/318/429
Single	PC ae C40:6	12	6306890	M1GA0015877	A	G	0.1939	4.167e-12		++	33/299/455
Single	PC ae C42:5	12	6306890	M1GA0015877	A	G	0.1939	2.794e-10		++	33/299/455
Single	PC ae C38:5	12	6306890	M1GA0015877	A	G	0.1939	2.932e-10		++	33/299/455
Single	PC ae C36:4	12	6306890	M1GA0015877	A	G	0.1939	1.24e-09		++	33/299/455
Single	PC ae C44:6	12	6306890	M1GA0015877	A	G	0.1939	1.998e-09		++	33/299/455
Single	PC ae C42:4	12	6306890	M1GA0015877	A	G	0.1939	5.834e-08		++	33/299/455
Single	PC ae C44:5	12	6306890	M1GA0015877	A	G	0.1939	7.365e-08		++	33/299/455
Single	PC ae C38:6	12	6306890	M1GA0015877	A	G	0.1939	1.567e-07		++	33/299/455
Single	PC ae C38:4	12	6306890	M1GA0015877	A	G	0.1939	5.431e-07		++	33/299/455
Single	PC ae C40:5	12	6306890	M1GA0015877	A	G	0.1939	1.016e-06		++	33/299/455
Single	PC aa C38:0	12	6306890	M1GA0015877	A	G	0.1939	1.443e-06		++	33/299/455
Ratio	PC ae C38:6 / SM C16:0	12	6306890	M1GA0015877	A	G	0.1939	4.101e-14	3.82102e+06	++	33/299/455
Ratio	PC ae C38:5 / SM C16:0	12	6306890	M1GA0015877	A	G	0.1939	5.713e-17	5.13215e+06	++	33/299/455
Ratio	PC ae C38:0 / PC ae C40:6	12	6306890	M1GA0015877	A	G	0.1939	1.682e-18	2.47741e+06	--	33/299/455
Ratio	PC ae C36:5 / PC ae C40:6	12	6306890	M1GA0015877	A	G	0.1939	3.36e-18	1.24018e+06	--	33/299/455
Ratio	PC ae C36:5 / PC ae C38:6	12	6306890	M1GA0015877	A	G	0.1939	1.252e-21	125159744409000	--	33/299/455
Ratio	PC ae C36:5 / PC ae C38:5	12	6306890	M1GA0015877	A	G	0.1939	6.742e-19	4.34886e+08	--	33/299/455
Ratio	PC ae C36:4 / SM C16:0	12	6306890	M1GA0015877	A	G	0.1939	4.803e-17	2.58172e+07	++	33/299/455
Ratio	PC ae C36:4 / PC ae C36:5	12	6306890	M1GA0015877	A	G	0.1939	1.607e-18	7.71624e+08	++	33/299/455
Ratio	PC ae C36:3 / PC ae C36:4	12	6306890	M1GA0015877	A	G	0.1939	4.104e-19	3.02144e+09	--	33/299/455
Ratio	PC ae C34:3 / PC ae C38:6	12	6306890	M1GA0015877	A	G	0.1939	4.2e-14	3.73095e+06	--	33/299/455
Ratio	PC ae C34:3 / PC ae C36:4	12	6306890	M1GA0015877	A	G	0.1939	8.104e-20	1.53011e+10	--	33/299/455
Ratio	PC ae C34:2 / PC ae C36:4	12	6306890	M1GA0015877	A	G	0.1939	3.445e-17	3.59942e+07	--	33/299/455
Ratio	PC ae C34:1 / PC ae C36:4	12	6306890	M1GA0015877	A	G	0.1939	2.09e-17	5.93301e+07	--	33/299/455
Single	PC ae C40:6	12	6356756	ALGA0064432	A	G	0.2145	4.094e-15		++	34/301/452
Single	PC ae C38:5	12	6356756	ALGA0064432	A	G	0.2145	2.184e-12		++	34/301/452
Single	PC ae C36:4	12	6356756	ALGA0064432	A	G	0.2145	5.776e-12		++	34/301/452
Single	PC ae C42:5	12	6356756	ALGA0064432	A	G	0.2145	1.239e-11		++	34/301/452
Single	PC ae C44:6	12	6356756	ALGA0064432	A	G	0.2145	2.203e-10		++	34/301/452
Single	PC ae C38:6	12	6356756	ALGA0064432	A	G	0.2145	4.838e-10		++	34/301/452
Single	PC aa C38:0	12	6356756	ALGA0064432	A	G	0.2145	9.681e-09		++	34/301/452
Single	PC ae C44:5	12	6356756	ALGA0064432	A	G	0.2145	1.482e-08		++	34/301/452
Single	PC ae C42:4	12	6356756	ALGA0064432	A	G	0.2145	1.774e-08		++	34/301/452
Single	PC ae C40:5	12	6356756	ALGA0064432	A	G	0.2145	1.681e-07		++	34/301/452
Single	PC ae C38:4	12	6356756	ALGA0064432	A	G	0.2145	2.494e-07		++	34/301/452
Ratio	PC ae C38:6 / SM C16:0	12	6356756	ALGA0064432	A	G	0.2145	2.537e-17	1.90698e+07	++	34/301/452
Ratio	PC ae C38:5 / SM C16:0	12	6356756	ALGA0064432	A	G	0.2145	2.895e-19	7.54404e+06	++	34/301/452
Ratio	PC ae C36:5 / PC ae C38:6	12	6356756	ALGA0064432	A	G	0.2145	8.797e-23	5499602137090	--	34/301/452
Ratio	PC ae C36:4 / SM C16:0	12	6356756	ALGA0064432	A	G	0.2145	5.014e-20	1.15197e+08	++	34/301/452
Ratio	PC ae C36:4 / PC ae C36:5	12	6356756	ALGA0064432	A	G	0.2145	2.31e-18	2.50043e+06	++	34/301/452
Ratio	PC ae C36:3 / PC ae C36:4	12	6356756	ALGA0064432	A	G	0.2145	8.855e-24	652286843591	--	34/301/452
Ratio	PC ae C34:3 / PC ae C38:6	12	6356756	ALGA0064432	A	G	0.2145	2.448e-17	1.97631e+07	--	34/301/452
Ratio	PC ae C34:3 / PC ae C36:4	12	6356756	ALGA0064432	A	G	0.2145	1.382e-23	417945007236	--	34/301/452
Ratio	PC ae C34:2 / PC ae C36:4	12	6356756	ALGA0064432	A	G	0.2145	2.425e-21	2.38186e+09	--	34/301/452
Ratio	PC ae C34:1 / PC ae C36:4	12	6356756	ALGA0064432	A	G	0.2145	8.533e-22	6.76901e+09	--	34/301/452
Single	PC ae C44:5	12	6731269	ALGA0122080	A	G	0.7126	1.671e-07		--	49/306/432
Single	PC ae C40:6	12	6731269	ALGA0122080	A	G	0.7126	4.677e-07		--	49/306/432
Single	PC ae C42:5	12	6731269	ALGA0122080	A	G	0.7126	9.863e-07		--	49/306/432
Single	Serotonin	12	43477367	ALGA0066628	A	C	0.1639	1.247e-07		--	17/232/538
Single	Serotonin	12	45827405	ASGA0054862	A	G	0.6551	2.098e-06		--	65/295/427
Single	PC aa C38:4	12	60396907	ALGA0124050	A	C	0.6489	9.217e-07		--	22/239/526
Single	PC aa C34:4	12	60396907	ALGA0124050	A	C	0.6489	1.012e-06		--	22/239/526
Single	Cit	13	132785255	MARC0031610	A	G	0.4742	2.935e-08		--	170/391/226
Single	Cit	13	132858651	ALGA0072015	A	C	0.5491	1.934e-07		++	192/395/200
Single	Cit	13	132947055	INRA0041019	A	C	0.4509	1.934e-07		--	192/395/200
Single	Cit	13	132996311	ASGA0058869	A	G	0.4509	1.934e-07		--	192/395/200
Single	Cit	13	133062111	ALGA0072018	A	G	0.4516	1.939e-07		--	191/395/200
Single	Cit	13	133097571	ALGA0072022	A	G	0.5256	6.573e-07		++	164/400/222
Single	Cit	13	133138520	ALGA0072038	A	G	0.4874	2.979e-08		--	153/396/238
Single	Cit	13	134231909	ASGA0058906	A	G	0.833	7.092e-08		++	19/148/620
Single	Cit	13	135372527	ALGA0122555	A	G	0.63	6.625e-09		++	118/364/304
Single	lysoPC a C20:4	13	207771882	M1GA0017995	A	G	0.2989	1.954e-06		--	22/240/525
Single	C0	14	61590196	ALGA0078249	A	G	0.0953	4.32e-08		--	6/104/677
Single	C0	14	61700008	MARC0031334	A	G	0.8658	7.153e-07		++	16/168/603
Single	PC ae C44:5	14	64417868	M1GA0018786	A	G	0.3151	2.421e-06		++	47/279/461
Single	PC aa C40:4	14	122538710	DIAS0004286	A	G	0.8319	9.048e-08		++	6/174/607
Ratio	SM (OH) C22:1 / SM::OH::C24:1	14	140598974	M1GA0020074	A	C	0.6362	1.545e-08	1.75599e+06	++	101/375/311
Ratio	SM (OH) C22:1 / SM::OH::C24:1	14	140612004	MARC0028756	A	G	0.6362	1.545e-08	1.75599e+06	++	101/375/311
Ratio	SM (OH) C24:1 / SM C16:0	14	141410475	ASGA0068311	A	G	0.4549	2.006e-11	5.4985e+06	--	171/390/226
Ratio	SM (OH) C24:1 / SM C20:2	14	141690183	SIRI0000194	A	G	0.456	1.036e-10	1.0444e+06	--	169/392/226
Ratio	SM (OH) C24:1 / SM C16:0	14	141690183	SIRI0000194	A	G	0.456	2.258e-11	4.79185e+06	--	169/392/226
Single	C18:2	15	130757592	ALGA0123307	A	G	0.6822	8.189e-09		--	67/294/422
Single	C18:2	15	130961823	H3GA0045336	A	G	0.6718	1.917e-09		--	52/281/442
Ratio	C16 / C18:2	15	130961823	H3GA0045336	A	G	0.6718	2.041e-15	939245	++	52/281/442
Single	C18:2	15	131039525	MARC0074589	A	C	0.8191	5.624e-10		--	2/88/697
Single	C18:2	15	131052021	MARC0113771	A	G	0.1917	2.882e-16		++	16/151/620
Ratio	C14:1 / C18:2	15	131052021	MARC0113771	A	G	0.1917	1.818e-22	1.58526e+06	--	16/151/620
Single	C18:2	15	131178384	M1GA0020535	A	G	0.439	6.57e-07		++	111/343/333
Single	C18:2	15	131198959	ALGA0088010	A	G	0.6854	1.652e-17		--	48/295/444
Ratio	C16 / C18:2	15	131198959	ALGA0088010	A	G	0.6854	1.156e-25	1.42907e+08	++	48/295/444
Ratio	C14:1 / C18:2	15	131198959	ALGA0088010	A	G	0.6854	2.005e-26	8.2394e+08	++	48/295/444
Single	C18:2	15	131261928	ALGA0088014	A	G	0.7104	1.3e-14		--	41/271/475
Single	C18:2	15	131412615	H3GA0045368	A	G	0.6368	8.353e-09		--	45/286/456
Single	C18:2	15	131460883	M1GA0020537	A	G	0.7355	1.353e-10		--	30/205/552
Single	C18:2	15	131638959	ASGA0071383	A	G	0.2354	2.279e-06		++	4/143/640
Ratio	Lys / Thr	17	5061992	ALGA0092844	A	G	0.4384	4.757e-10	2.21778e+06	++	178/405/204
Ratio	Arg / Thr	17	5061992	ALGA0092844	A	G	0.4384	3.902e-10	2.01948e+06	++	178/405/204
Ratio	Lys / Thr	17	5154217	ASGA0075100	A	G	0.5544	4.154e-10	5.25277e+06	--	178/403/205
Ratio	Arg / Thr	17	5154217	ASGA0075100	A	G	0.5544	2.564e-11	9.922e+06	--	178/403/205
Ratio	Lys / Thr	17	5177460	MARC0079929	A	C	0.5547	5.993e-10	4.00968e+06	--	179/403/205
Ratio	Arg / Thr	17	5177460	MARC0079929	A	C	0.5547	3.127e-11	9.77295e+06	--	179/403/205
Single	lysoPC a C16:1	17	54676990	H3GA0049609	A	G	0.7086	8.398e-07		++	64/296/427
Single	PC aa C32:2	17	54676990	H3GA0049609	A	G	0.7086	2.162e-06		++	64/296/427
Single	PC aa C32:2	17	54718055	ASGA0077814	A	G	0.2469	4.237e-07		--	67/307/413
1 The analyses are reported for single metabolites or for the ratio of pairs of metabolites.
2 Position of the SNP on Sscrofa11.1 reference genome
3 Minor Allele Frequency
4 P-gain is reported only for the metabolite ratios
5 Direction of beta of association: Estimated based on additive genetic models assuming a trend per copy of the minor allele used to specify the dependency of each metabolite trait on genotype categories. The indication included two symbols for each entry (++ or --, according to the direction) that referred to the GWAS results for the two breeds: Large White and Duroc.
6 The number of pigs of the three genotypes are: number of homozygous pigs for the minor allele/number of heterozygous pigs/number of homozygous pigs for the major allele.

## Sheet: Table_S11
Table S11. Complete list of mQTL identified in pigs and comparative analysis of mQTL between pigs and humans.
Information in pigs (from Table 2)											Information in humans					General information on the candidate genes17
No.1	SSC2	SNP3	Position4	Metabolite5	p-value6	GWAS7	Metabolite ratios8	p-gain9	GWAS10	Candidate gene(s)11	Human12	Database13	Identical metabolite(s)14	Metabolite Family15	Other associated human metabolite(s)16	Gene function description
1	1	ALGA0001160	13637577	-	-	-	PC aa C32:0 / PC aa C34:4 and PC aa C32:0 / PC ae C32:2	1.52×106	D	SYNE1r, VIP r	Yes	PhenoScanner2	No	Yes	Other phosphatidylcholines: PC aa C38:1 / PC aa C30:2	GeneCards: SYNE1: This gene encodes a spectrin repeat containing protein expressed in skeletal and smooth muscle, and peripheral blood lymphocytes, that localizes to the nuclear membrane. Mutations in this gene have been associated with autosomal recessive spinocerebellar ataxia 8, also referred to as autosomal recessive cerebellar ataxia type 1 or recessive ataxia of Beauce. GeneCards: VIP: The …
2	1	H3GA0001315	30232849	Ile	2.08×10-07	Meta	-	-	-	SLC2A12t	Yes	PhenoScanner2	No	Yes	Other amino acids: Glycine	Gene Cards: SLC2A12 belongs to a family of transporters that catalyze the uptake of sugars through facilitated diffusion. This family of transporters show conservation of 12 transmembrane helices as well as functionally significant amino acid residues.
3	1	DIAS0002497	31868855	Orn (Arg)	7.71×10-13	Meta, LW	Arg/Orn and Arg/Lys	2.49×1021	LW, D, Meta	ARG1e	Yes	GWAS Catalog	Yes	Yes	Other amino acids. See also additional information in Supplementary Table S6.	GeneCards: Arginase catalyzes the hydrolysis of arginine to ornithine and urea.
4	1	ASGA0002320	36529754	Orn	2.29×10-07	LW	Arg/Orn	1.07×107	LW	-	-	-	-	-	-	-
5	1	H3GA0001989	71563587	C14:2	1.04×10-06	LW	-	-	-	-	-	-	-	-	-	-
6	1	ALGA0005631	114573450	-	-	-	Ala / Spermine	1.68×109	D	-	-	-	-	-	-	-
7	1	ALGA0005956	127957580	PC ae C34:3	3.39×10-07	D	-	-	-	CATSPER2r	Yes	GWAS Catalog	No	Yes	Other phosphatidylcholines. See also additional information in Supplementary Table S6.	GeneCards: This gene encodes a member of a family of cation channel proteins that localize to the flagellum of spermatozoa.
8	1	ALGA0005986	130488207	-	-	-	SM C16:0 / SM C18:0	1.67×107	D	CHP1r	No	GeneCards	-	-	-	GeneCards: It is an essential regulatory protein of glycerolipid synthesis and storage.
9	1	ALGA0006012	131201231	-	-	-	C4 / C5	1.78×105	LW	IVDe	Yes	GWAS Catalog	Yes	Yes	Other acylcarnitines. See also additional information in Supplementary Table S6.	GeneCards: Catalyzes the conversion of isovaleryl-CoA/3-methylbutanoyl-CoA to 3-methylbut-2-enoyl-CoA as an intermediate step in the leucine (Leu) catabolic pathway. To a lesser extent, is also able to catalyze the oxidation of other saturated short-chain acyl-CoA thioesters as pentanoyl-CoA, hexenoyl-CoA and butenoyl-CoA.
10	1	ALGA0006071	133696865	PC ae C34:3	1.83×10-06	D	-	-	-	MEIS2r	Yes	PhenoScanner2	No	Yes	Other phosphatidylcholines: Phosphatidylcholine diacyl C38:5, Phosphatidylcholine (16:0/22:5n3, 18:1/20:4)	GeneCards: Involved in transcriptional regulation.
11	1	MARC0065533	253959579	-	-	-	PC aa C34:4 / lysoPC a C16:0	5.49×105	LW	-	-	-	-	-	-	-
12	1	ASGA0008038	270725631	Cit	1.44×10-12	Meta, LW	-	-	-	ASS1e	Yes	GWAS Catalog	Yes	No	Associated only with citrulline. See also additional information in Supplementary Table S6.	GeneCards: One of the enzymes of the urea cycle, the metabolic pathway transforming neurotoxic amonia produced by protein catabolism into inocuous urea in the liver of ureotelic animals. Catalyzes the formation of arginosuccinate from aspartate, citrulline and ATP and together with ASL it is responsible for the biosynthesis of arginine in most body tissues.
13	1	MARC0072424	272712128	-	-	-	PC ae C38:4 / PC ae C40:5	1.44×106	LW	GFI1Br, SURF4r, CELe	Yes	PhenoScanner2, GeneCards	No	Yes	Other phosphatidylcholines. GFI1B: PC ae C44:5 / PC aa C36:0 - SURF1: PC aa C36:4 / PC ae C44:3.	GeneCards: GFI1B: Essential proto-oncogenic transcriptional regulator necessary for development and differentiation of erythroid and megakaryocytic lineages. GeneCards: SURF4: Endoplasmic reticulum cargo receptor that mediates the export of lipoproteins by recruiting cargos into COPII vesicles to facilitate their secretion. Acts as a cargo receptor for lipoproteins bearing both APOB and APOA1, th…
14	1	M1GA0002011	273242436	Sarcosine	3.49×10-08	LW	-	-	-	SARDHe	Yes	GWAS Catalog	Yes	No	Associated only with sarcosine. See also additional information in Supplementary Table S6.	GeneCards: This gene encodes an enzyme localized to the mitochondrial matrix which catalyzes the oxidative demethylation of sarcosine.
15	2	MARC0018949	9548890	PC ae C42:0	6.08×10-07	Meta, D	PC aa C38:3 / PC aa C40:4 (9)	3.01×108	D	FADS1e, FADS2e, FADS3e	Yes	GWAS Catalog	No	Yes	Other phosphatidylcholines. See also additional information in Supplementary Table S6.	GeneCards: The FADS cluster comprising three genes (FADS1, FADS2 and FADS3). The proteins encoded by these genes are members of the fatty acid desaturase (FADS) gene family. Desaturase enzymes regulate unsaturation of fatty acids through the introduction of double bonds between defined carbons of the fatty acyl chain.
16	2	MARC0028771	26333042	PC aa C40:5	1.94×10-06	Meta	-	-	-	-	-	-	-	-	-	-
17	2	MARC0032515	39825972	-	-	-	SM C16:0 / SM C18:1	2.63×105	LW	-	-	-	-	-	-	-
18	2	MARC0027345	45628435	SM C18:0	1.70×10-06	LW	PC aa C32:0 / PC ae C34:1 (37)	3.42×1011	LW, Meta	FAR1e	No	GeneCards	-	-	-	GeneCards: The protein encoded by this gene is required for the reduction of fatty acids to fatty alcohols, a process that is required for the synthesis of monoesters and ether lipids. Catalyzes the reduction of saturated and unsaturated C16 or C18 fatty acyl-CoA to fatty alcohols. It plays an essential role in the production of ether lipids/plasmalogens which synthesis requires fatty alcohols.
19	2	MARC0081387	50110622	-	-	-	SM C16:1 / SM C18:1 (1)	1.02×1008	LW, Meta	SNAP47r	Yes	PhenoScanner2	No	Yes	Other sphingomyelins: Sphingomyelin, Sphingomyelin (d18:1/20:0, d16:1/22:0)	GeneCards: Predicted to enable SNAP receptor activity and syntaxin binding activity. Predicted to be involved in synaptic vesicle fusion to presynaptic active zone membrane and synaptic vesicle priming. Predicted to act upstream of or within long-term synaptic potentiation.
20	2	ALGA0013946	60455290	-	-	-	SM C16:1 / SM C18:1 (5)	6.30×1012	LW, Meta	TM6SF2r, UPF1r	Yes	GWAS Catalog	No	Yes	Other sphingomyelins for both genes: See also additional information in Supplementary Table S6.	GeneCards: TM6SF2: Enables identical protein binding activity. Involved in regulation of lipid metabolic process.Regulator of liver fat metabolism influencing triglyceride secretion and hepatic lipid droplet content. GeneCards: UPF1: This gene encodes a protein that is part of a post-splicing multiprotein complex involved in both mRNA nuclear export and mRNA surveillance.
21	2	INRA0008800	66008692	SM C18:1 (SM C18:0)	3.0×10-07	LW	SM C16:1 / SM C18:1 (10)	3.94×1010	LW, Meta	DHPSe	Yes	PhenoScanner2	Yes	Yes	Other sphingomyelins: Sphingomyelins (d18:1/14:0, d16:1/16:0)	GeneCards: This gene encodes a protein that is required for the formation of hypusine, a unique amino acid formed by the posttranslational modification of only one protein, eukaryotic translation initiation factor 5A.
22	2	DRGA0003003	70649393	SM C18:0 (SM C18:1)	2.60×10-09	LW	SM C16:1 / SM C18:1 (9)	7.04×1014	LW, Meta	CERS4e, LDLRr	Yes	GWAS Catalog	Yes	Yes	Other sphingomyelins for both genes: See also additional information in Supplementary Table S6.	GeneCards: CERS4: Enables sphingosine N-acyltransferase activity. Involved in ceramide biosynthetic process. eramide synthase that catalyzes formation of ceramide from sphinganine and acyl-CoA substrates, with high selectivity toward long and very-long chains (C18:0-C22:0) as acyl donor.GeneCards: GeneCards: LDLR: The low density lipoprotein receptor (LDLR) gene family consists of cell surface pr…
23	2	MARC0040459	77810469	-	-	-	SM C16:1 / SM C18:1 (5)	9.40×1010	LW	PLPPR3r	No	GeneCards	-	-	-	GeneCards: The proteins in the lipid phosphate phosphatase (LPP) family, are integral membrane proteins that modulate bioactive lipid phosphates including phosphatidate, lysophosphatidate, and sphingosine-1-phosphate in the context of cell migration, neurite retraction, and mitogenesis.
24	2	ASGA0012664	145517996	PC aa C32:3	1.88×10-06	Meta	-	-	-	-	-	-	-	-	-	-
25	3	M1GA0004309	40354181	-	-	-	ADMA / total-DMA	2.74×105	LW	UBE2Ie	No	GeneCards; PubChem	-	-	-	GeneCards: The modification of proteins with ubiquitin is an important cellular mechanism for targeting abnormal or short-lived proteins for degradation PubChem: PMID 20965886: Indirect role of UBE2I in co-regulating ADMA production.
26	4	SIRI0000276	14576462	SM C20:2	2.07×10-07	Meta	-	-	-	TRIB1r	Yes	PhenoScanner2	No	Yes	Other sphingomyelins: Sphingomyelin (d18:0/20:0, d16:0/22:0) levels, Sphingomyelin (d18:0/20:0, d16:0/22:0) , Sphingomyelin level	GeneCards: Enables mitogen-activated protein kinase kinase binding activity and protein kinase inhibitor activity.
27	4	ASGA0019102	28084136	SM C26:1	2.48×10-06	D	-	-	-	-	-	-	-	-	-	-
28	4	ASGA0085258	93440441	-	-	-	PC ae C38:2 / SM (OH) C14:1	2.07×105	D	MEF2Dr	Yes	PhenoScanner2	No	Yes	Other phosphatidylcholines: Phosphatidylcholine diacyl C32:3	GeneCards: This gene is a member of the myocyte-specific enhancer factor 2 (MEF2) family of transcription factors. Members of this family are involved in control of muscle and neuronal cell differentiation and development, and are regulated by class II histone deacetylases.
29	4	ALGA0028020	109206088	C14:1	2.34×10-06	D	-	-	-	-	-	-	-	-	-	-
30	4	ALGA0029016	122058519	-	-	-	PC aa C34:1 / PC aa C36:1 (4)	1.09×109	D, Meta	ALG14e	Yes	GWAS Catalog	Yes	Yes	Other phosphatidylcholines. See also additional information in Supplementary Table S6.	GeneCards: This gene is a member of the glycosyltransferase 1 family. The encoded protein and ALG13 are thought to be subunits of UDP-GlcNAc transferase, which catalyzes the first two committed steps in endoplasmic reticulum N-linked glycosylation.
31	4	ALGA0029576	128218375	-	-	-	PC aa C34:1 / PC aa C36:1	1.66×105	D	-	-	-	-	-	-	-
32	4	MARC0030292	130543416	ADMA (total-DMA)	2.55×10-14	LW, Meta	-	-	-	DDAH1e	Yes	GWAS Catalog	Yes	Yes	Other arginine derivatives. See also additional information in Supplementary Table S6.	GeneCards: This gene belongs to the dimethylarginine dimethylaminohydrolase (DDAH) gene family. Hydrolyzes N(G),N(G)-dimethyl-L-arginine (ADMA) and N(G)-monomethyl-L-arginine (MMA) which act as inhibitors of NOS.
33	5	ALGA0032040	56960624	-	-	-	PC aa C32:3 / PC aa C36:1 (2)	2.41×108	D	PTPROr, RERGr	Yes	PhenoScanner2	No	Yes	Other phosphatidylcholines: PTPRO: PC ae C36:5 / C8:1 - RERG: C10:2 / PC aa C36:0	GeneCards: PTPRO: This gene encodes a member of the R3 subtype family of receptor-type protein tyrosine phosphatases. GeneCards: RERG: RERG, a member of the RAS superfamily of GTPases, inhibits cell proliferation and tumor formation.
[truncated: 83 more rows]

## Sheet: Table_S12
Table S12. Extended information obtained from GWAS Catalog of mQTL identified in humans.
[truncated: 1,126 more rows]

## Sheet: Table_S14
Table S14. Genetic variants identified from whole-genome resequencing of Large White, Duroc and Landrace pigs. Only missense, frameshift, in-frame deletions and insertion, stop gained and start lost variants are reported. For each pig breed (Large White, Duroc and Landrace), the number of animals carrying the three genotypes and allele frequencies are provided.
[truncated: 7,225 more rows]

[truncated: 1 more sheets: Table S18]
